# Supplementary material for: Quantitative Data-Independent Acquisition Glycoproteomics of Sparkling Wine
Source: PubMed Central journal article supplement (PMC8724608; doi:10.1074/mcp.ra120.002181), 2020-12-21
Supplement: mmc1.pdf [file mmc1.pdf]

| PID        | Prot. Rank | Pos. | Sequence                       | Mods (variable)         | Glycans | Score | Delta Mo Score | z | Obs. m/z | Calc. m/z | ppm err. | Off-By-X | Obs. MH   | Calc. MH  | Cleavage | Glycans Pos. | Protein Name                                                                       | Prot. Id | Scan Time |
|------------|------------|------|--------------------------------|-------------------------|---------|-------|----------------|---|----------|-----------|----------|----------|-----------|-----------|----------|--------------|------------------------------------------------------------------------------------|----------|-----------|
| 1   135... | 1          | 33   | R.VNLVELGVYVS[+162.05282]DIR.A | S11(Oglycan / 162.0528) | Hex(1)  | 959.8 | 694.7          | 2 | 869.4563 | 869.4671  | -12.36   |          | 1737.9054 | 1737.9269 | Specific | 11           | >sp P43575 PAU5_YEAST Seripauperin-5 OS=Saccharomyces cerevisiae (strain ATCC 2... | 3411     | 18.9753   |

| Prot. Rank | Protein Name                                                                                            | [Log Prob] | Best [Log Prob] | Best Score | # Spectra | # Uniq. Peps. | # Mod Peps. | % Cov. | # AAs | Intensity |
|------------|---------------------------------------------------------------------------------------------------------|------------|-----------------|------------|-----------|---------------|-------------|--------|-------|-----------|
| 2   2      | >sp P32612 PAU2_YEAST Seripauperin-2 OS=Saccharomyces cerevisiae (strain ATCC 204508 / S288c) OX=559... | 178.33     | 13.24           | 726.5      | 270       | 60            | 58          | 58.3   | 120   | 7.688e+6  |

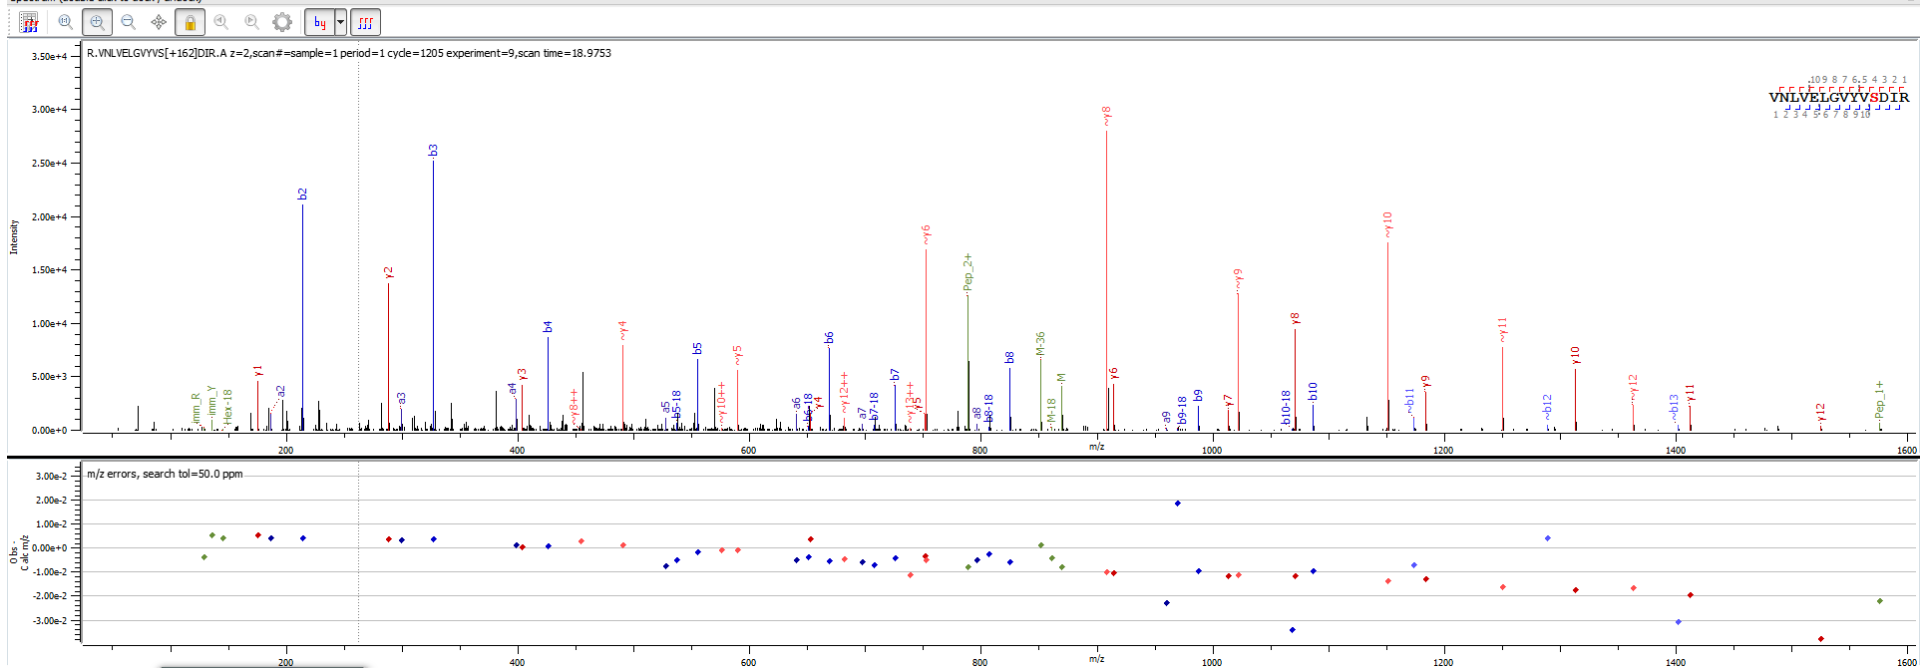

Sample S2 R.VNLVELGVYVS[+162.053]DIR.A

| PID | Prot. Rank | Pos. | Sequence | Mods (variable)                | Glycans                 | Score  | delta Mo Score | z     | Obs. m/z | Calc. m/z | ppm err. | Off-By-X | Obs. MH   | Calc. MH  | Cleavage | Glycans Pos. | Protein Name                                                                       | Prot. Id | Scan Time |                  |
|-----|------------|------|----------|--------------------------------|-------------------------|--------|----------------|-------|----------|-----------|----------|----------|-----------|-----------|----------|--------------|------------------------------------------------------------------------------------|----------|-----------|------------------|
| 1   | 139...     | 1    | 33       | R.VNLVELGVYVS[+162.05282]DIR.A | S11(OGlycan / 162.0528) | Hex(1) | 762.5          | 556.0 | 3        | 579.9755  | 579.9805 | -8.58    | 1737.9120 | 1737.9269 | Specific | 11           | >sp P43575 PAU5_YEAST Seripauperin-5 OS=Saccharomyces cerevisiae (strain ATCC 2... | 3411     | 19.3134   | samples=1 period |

| Prot. Rank | Protein Name                                                                                            | [Log Prob] | Best [Log Prob] | Best Score | # Spectra | # Uniq. Peps. | # Mod Peps. | % Cov. | # AAs | Intensity |
|------------|---------------------------------------------------------------------------------------------------------|------------|-----------------|------------|-----------|---------------|-------------|--------|-------|-----------|
| 2          | >sp P32612 PAU2_YEAST Seripauperin-2 OS=Saccharomyces cerevisiae (strain ATCC 204508 / 5288c) OX=559... | 178.33     | 13.24           | 726.5      | 270       | 60            | 58          | 58.3   | 120   | 7.688e+6  |

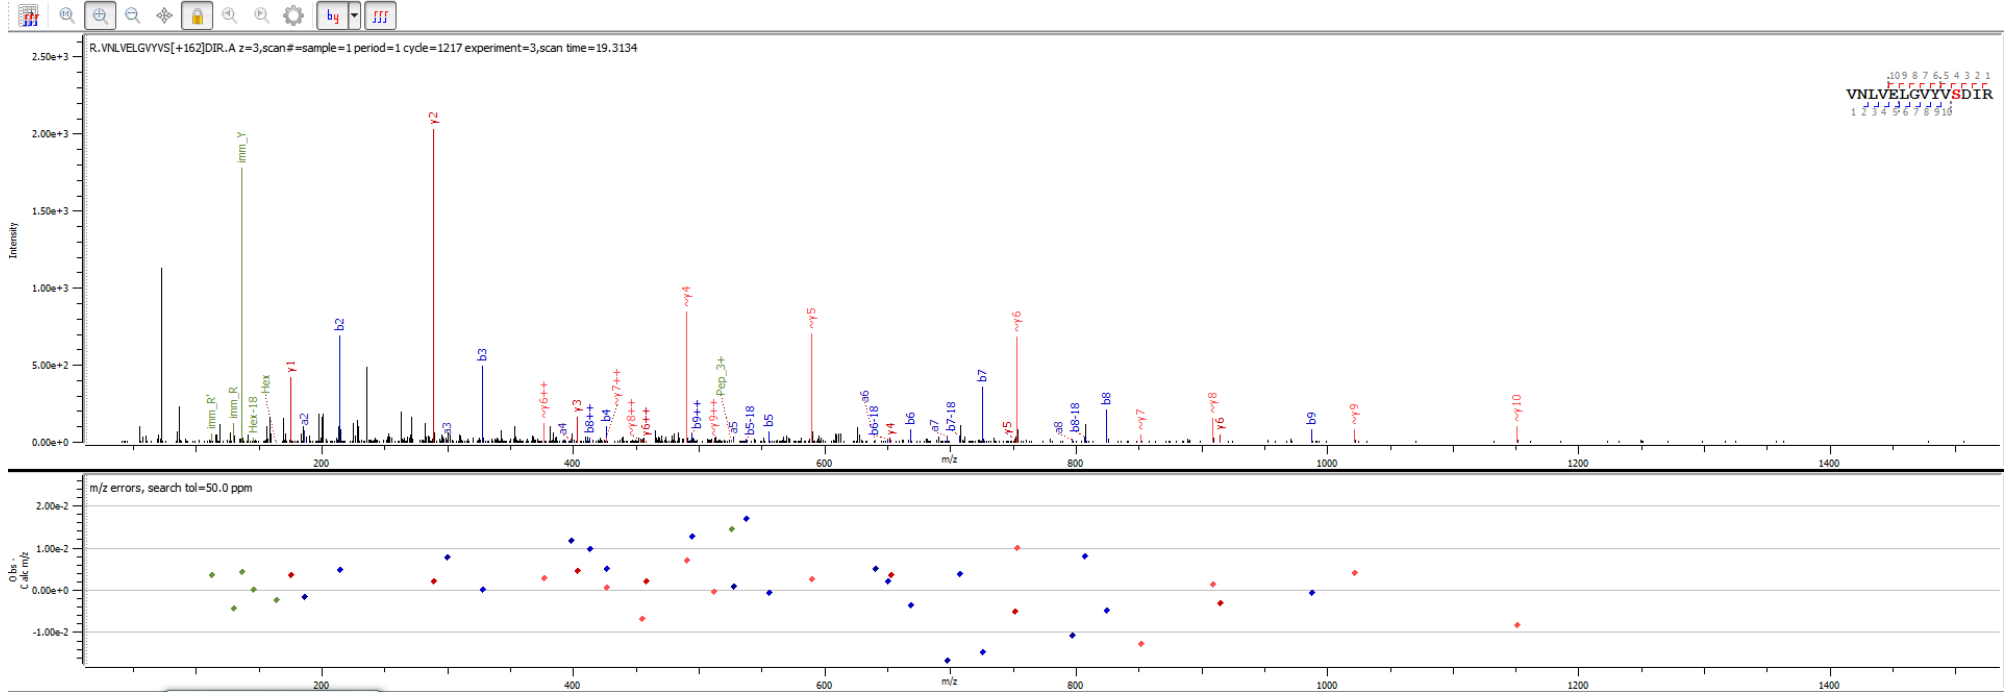

Sample S2 R.VNLVELGVYVS[+162.053]DIR.A

| PID | Prot. Rank | Pos. | Sequence | Mods (variable)                | Glycans                 | Score  | alta Mo Score | z     | Obs. m/z | Calc. m/z | ppm er.  | Off-By-X | Obs. MH   | Calc. MH  | Cleavage | Glycans Pos. | Protein Name                                                                       | Prot. Id | Scan Time |                 |
|-----|------------|------|----------|--------------------------------|-------------------------|--------|---------------|-------|----------|-----------|----------|----------|-----------|-----------|----------|--------------|------------------------------------------------------------------------------------|----------|-----------|-----------------|
| 1   | 135...     | 1    | 33       | R.VNLVELGVYVS[+324.10565]DIR.A | S11(OGlycan / 324.1056) | Hex(2) | 1004.1        | 667.8 | 2        | 950.4798  | 950.4935 | -14.42   | 1899.9523 | 1899.9797 | Specific | 11           | >sp P43575 PAU5_YEAST Seripauperin-5 OS=Saccharomyces cerevisiae (strain ATCC 2... | 3411     | 18.8978   | sample=1 period |

| Prot. Rank | Protein Name                                                                                            | [Log Prob] | Best [Log Prob] | Best Score | # Spectra | # Uniq. Peps. | # Mod. Peps. | % Cov. | # AAs | Intensity |
|------------|---------------------------------------------------------------------------------------------------------|------------|-----------------|------------|-----------|---------------|--------------|--------|-------|-----------|
| 2   2      | >sp P32612 PAU2_YEAST Seripauperin-2 OS=Saccharomyces cerevisiae (strain ATCC 204508 / S288c) OX=559... | 178.33     | 13.24           | 726.5      | 270       | 60            | 58           | 58.3   | 120   | 7.688e+6  |

Spectrum (double click to dock / undock)

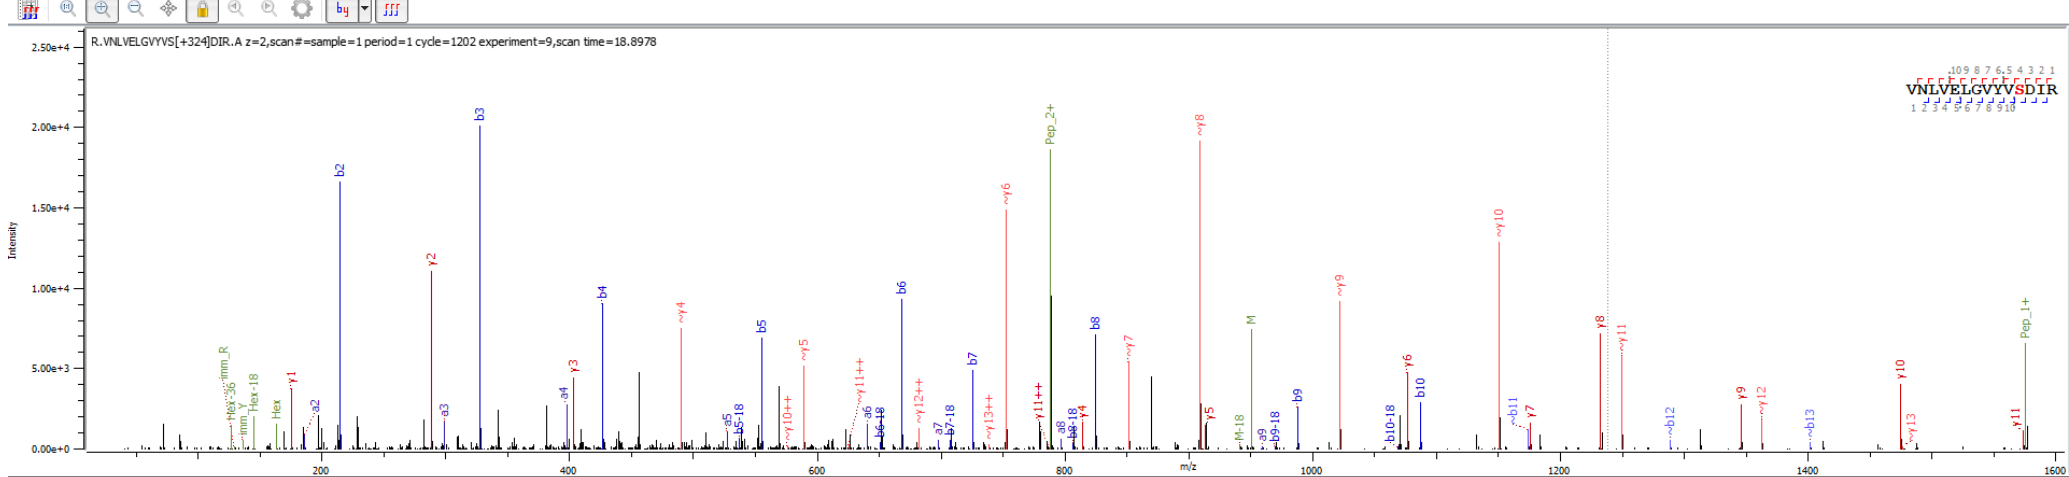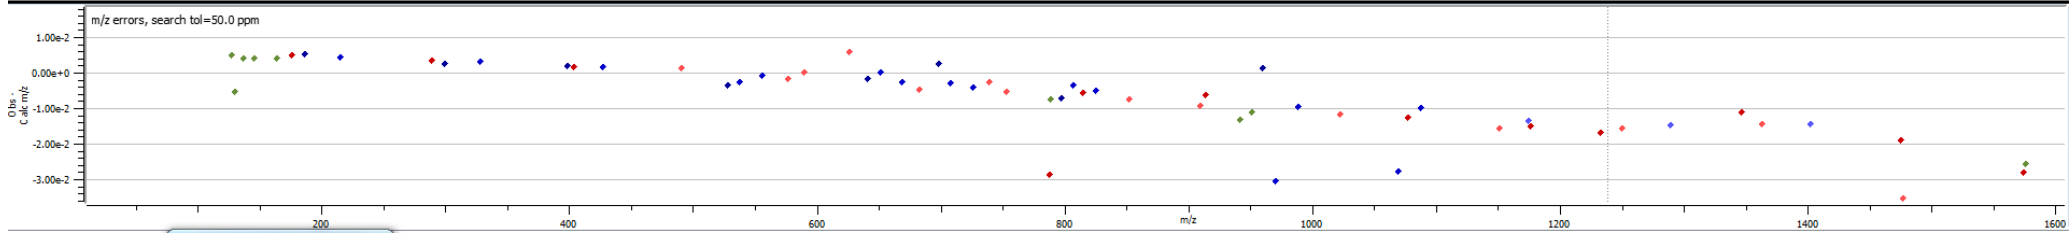

Sample S1 R.VNLVELGVYVS[+324.106]DIR.A

Peptide List (double click to dock / undock)

Peptides Experiment=4

| PID      | Prot. Rank | Pos. | Sequence                       | Mods (variable)         | Glycans | Score | alta Mo Score | z | Obs. m/z | Calc. m/z | ppm err. | Off-By-X | Obs. MH   | Calc. MH  | Cleavage | Glycans Pos. | Protein Name                                                                       | Prot. Id | Scan Time               |
|----------|------------|------|--------------------------------|-------------------------|---------|-------|---------------|---|----------|-----------|----------|----------|-----------|-----------|----------|--------------|------------------------------------------------------------------------------------|----------|-------------------------|
| 1 135... | 1          | 33   | R.VNLVELGVYVS[+324.10565]DIR.A | S11(OGlycan / 324.1056) | Hex(2)  | 864.6 | 617.5         | 3 | 633.9901 | 633.9981  | -12.57   |          | 1899.9558 | 1899.9797 | Specific | 11           | >sp P43575 PAU5_YEAST Seripauperin-5 OS=Saccharomyces cerevisiae (strain ATCC 2... | 3411     | 18.9186 sample=1 period |

Proteins Text filter...

| Prot. Rank | Protein Name                                                                                            | [Log Prob] | Best [Log Prob] | Best Score | # Spectra | # Uniq. Peps. | # Mod Peps. | % Cov. | # AAs | Intensity |
|------------|---------------------------------------------------------------------------------------------------------|------------|-----------------|------------|-----------|---------------|-------------|--------|-------|-----------|
| 2 2        | >sp P32612 PAU2_YEAST Seripauperin-2 OS=Saccharomyces cerevisiae (strain ATCC 204508 / S288c) OX=559... | 178.33     | 13.24           | 726.5      | 270       | 60            | 58          | 58.3   | 120   | 7.688e+6  |

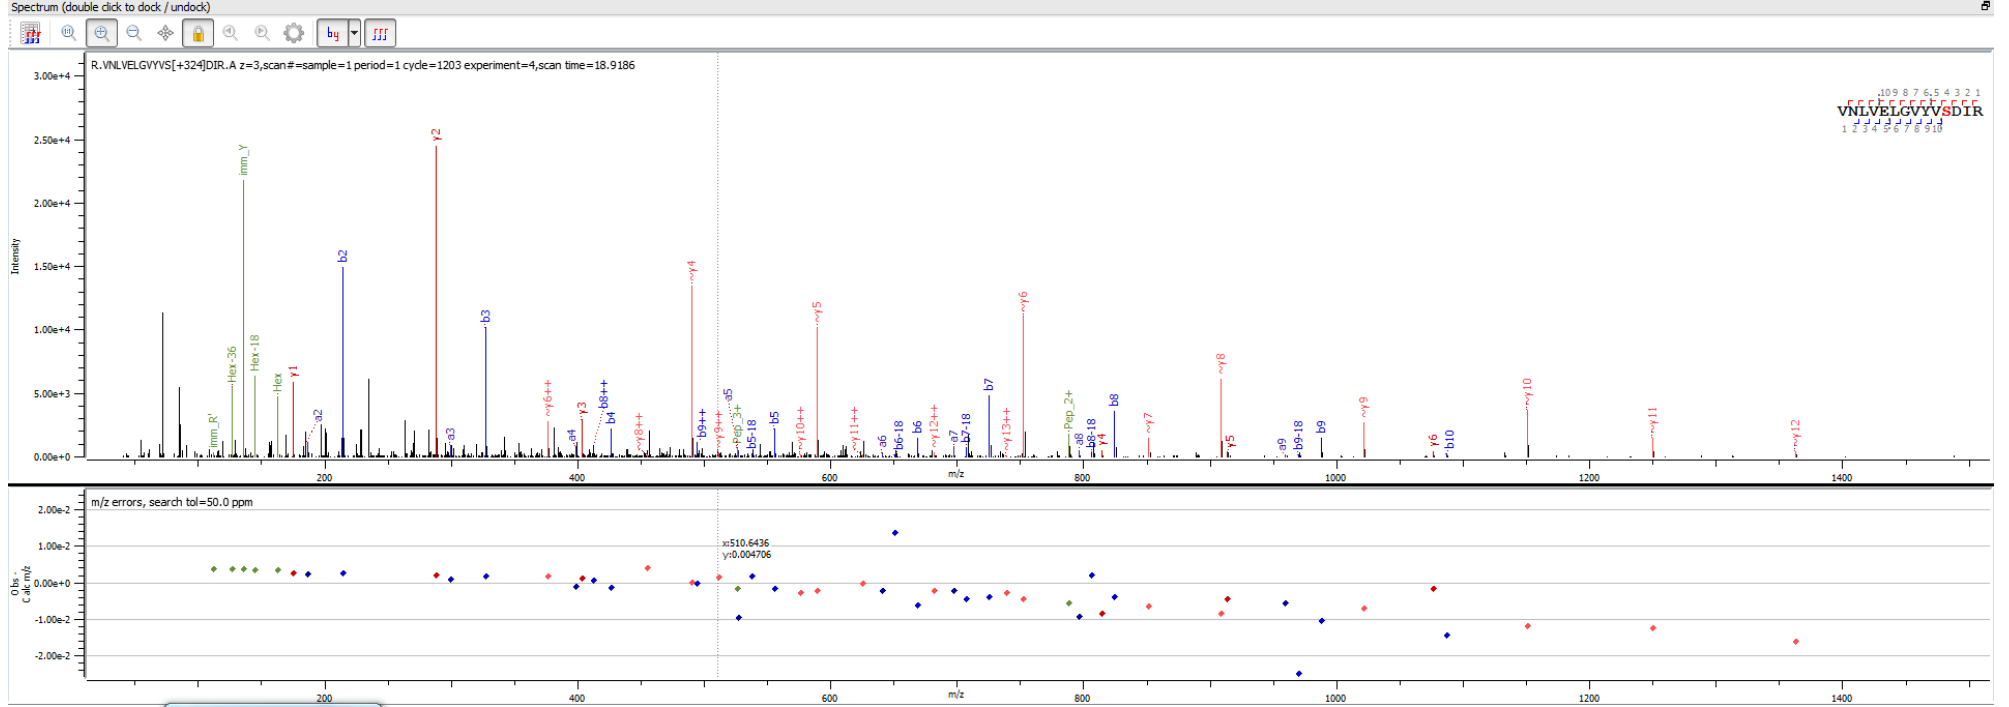

Sample S1 R.VNLVELGVYVS[+324.106]DIR.A

| PID        | Prot. Rank | Pos. | Sequence                       | Mods (variable)         | Glycans | Score | ΔMo Score | z | Obs. m/z  | Calc. m/z | ppm err. | Off-By-X | Obs. MH   | Calc. MH  | Cleavage | Glycans Pos. | Protein Name                                                                       | Prot. Id | Scan Time               |
|------------|------------|------|--------------------------------|-------------------------|---------|-------|-----------|---|-----------|-----------|----------|----------|-----------|-----------|----------|--------------|------------------------------------------------------------------------------------|----------|-------------------------|
| 1   132... | 1          | 33   | R.VNLVELGVYVS[+486.15847]DIR.A | S11(Oglycan / 486.1585) | Hex(3)  | 946.0 | 617.4     | 2 | 1031.5021 | 1031.5199 | -17.28   |          | 2061.9969 | 2062.0325 | Specific | 11           | >sp P43575 PAU5_YEAST Seripauperin-5 OS=Saccharomyces cerevisiae (strain ATCC 2... | 3411     | 18.5571 sample=1 period |

| Prot. Rank | Protein Name                                                                                            | [Log Prob] | Best [Log Prob] | Best Score | # Spectra | # Uniq. Peps. | # Mod Peps. | % Cov. | # AAs | Intensity |
|------------|---------------------------------------------------------------------------------------------------------|------------|-----------------|------------|-----------|---------------|-------------|--------|-------|-----------|
| 2   2      | >sp P32612 PAU2_YEAST Seripauperin-2 OS=Saccharomyces cerevisiae (strain ATCC 204508 / S288c) OX=559... | 178.33     | 13.24           | 726.5      | 270       | 60            | 58          | 58.3   | 120   | 7.689e+6  |

Spectrum (double click to dock / undock)

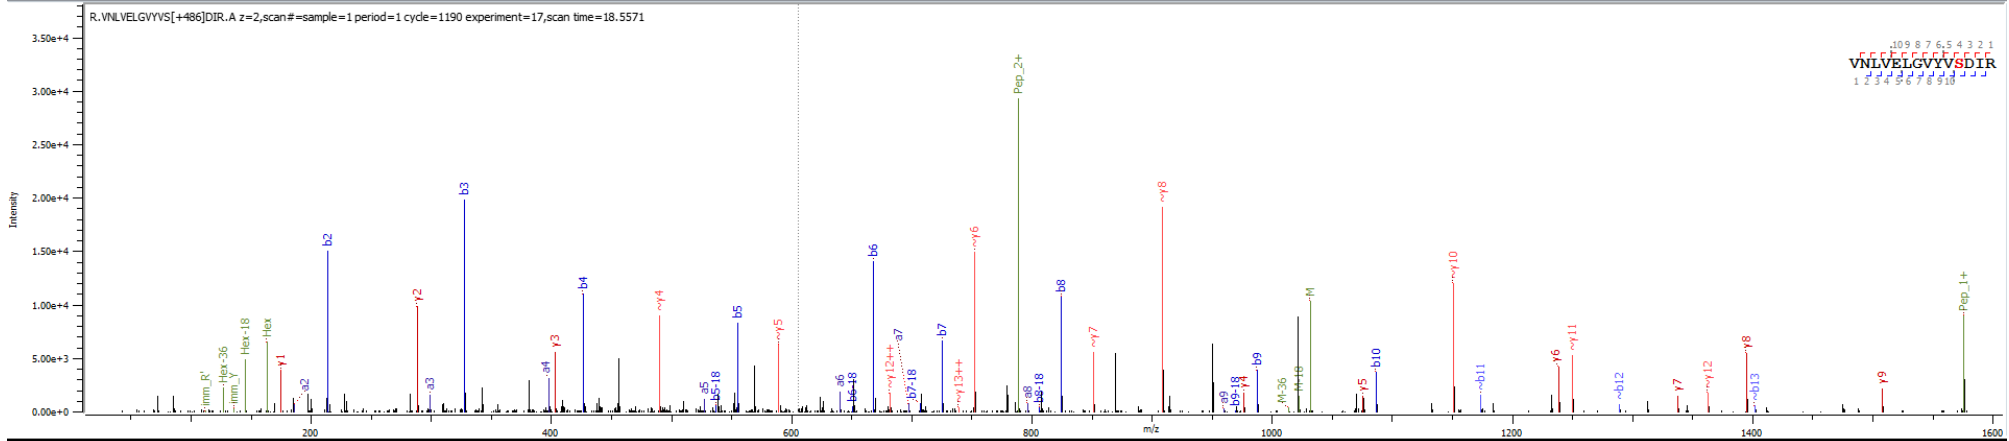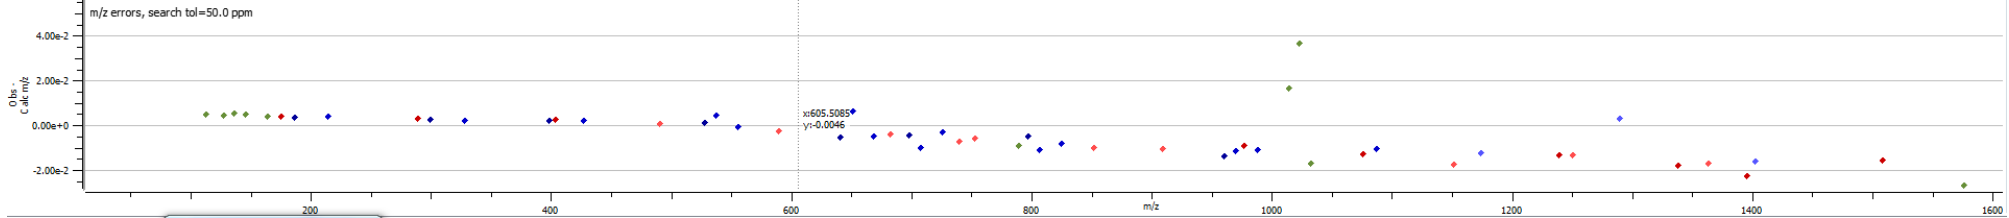

Sample S1 R.VNLVELGVYVS[+486.158]DIR.A

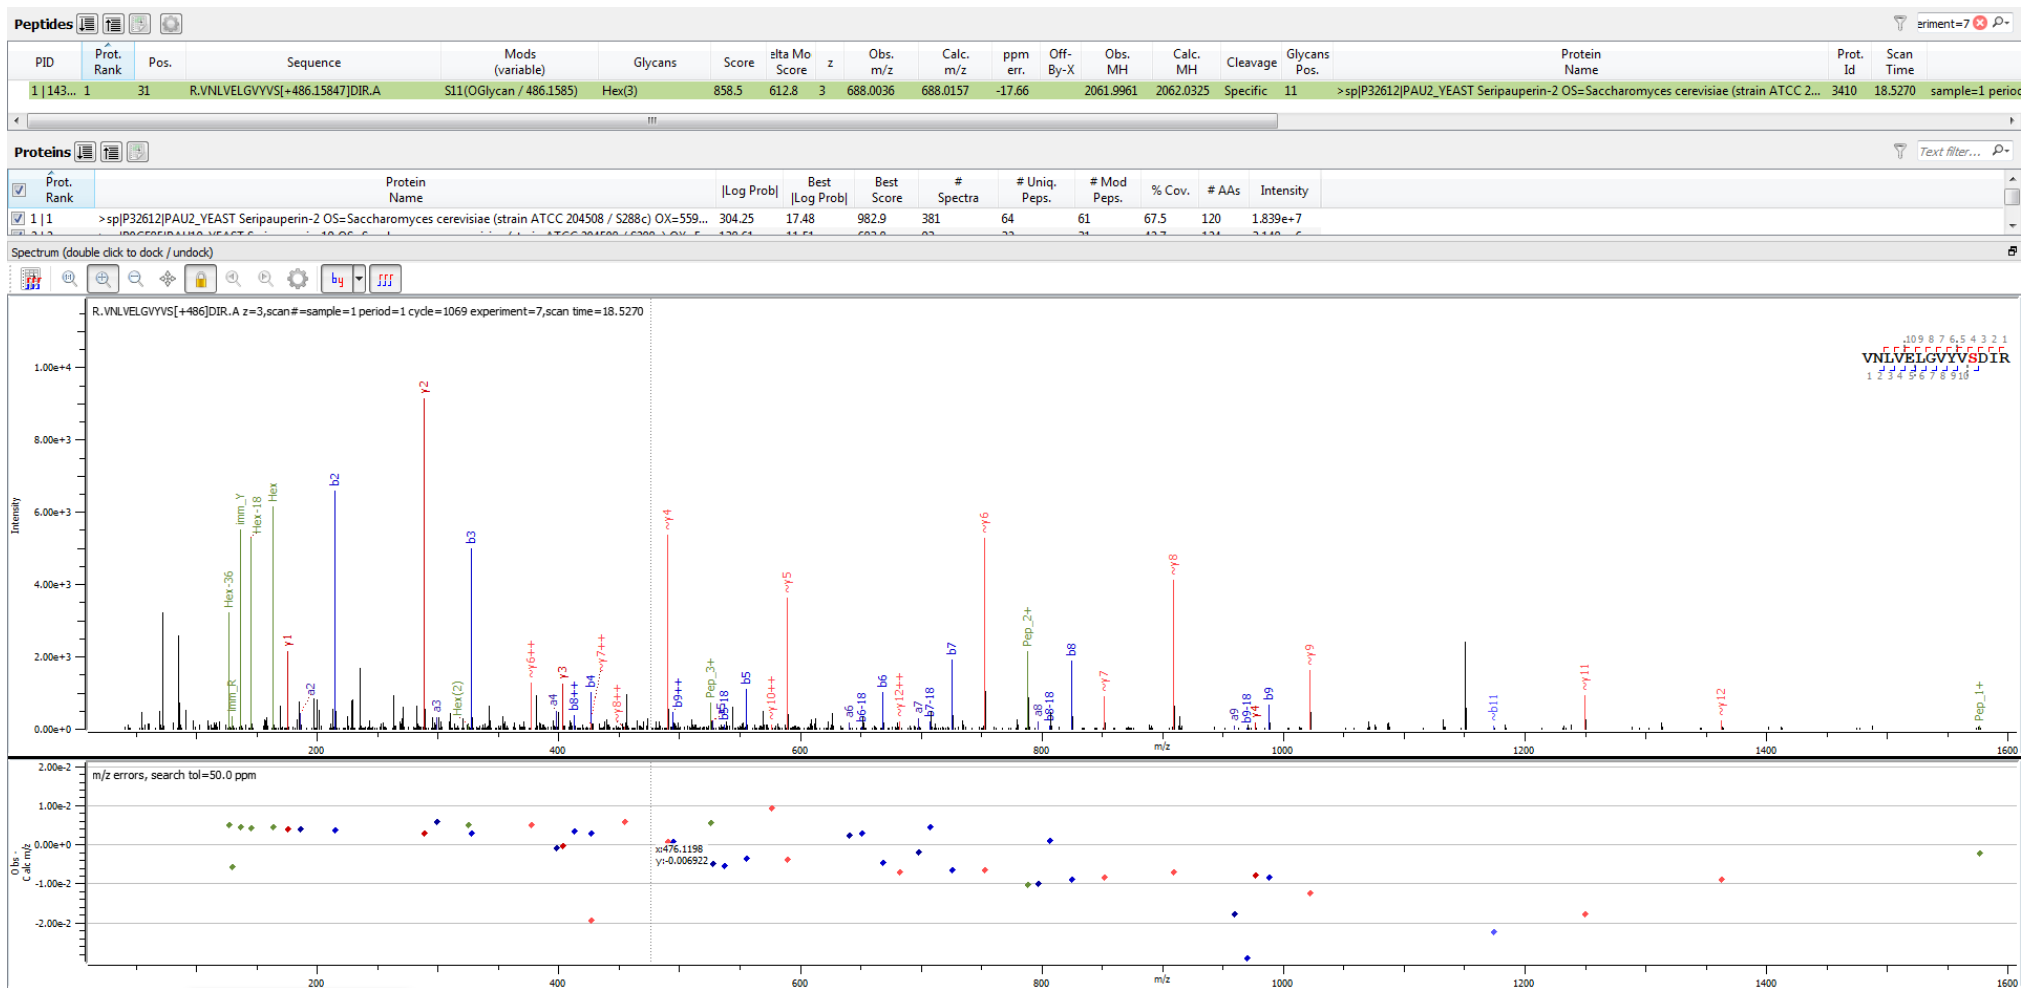

Sample S4 R.VNLVELGVYVS[+486.158]DIR.A

| PID        | Prot. Rank | Pos. | Sequence                      | Mods (variable)         | Glycans | Score | delta Mo Score | z | Obs. m/z  | Calc. m/z | ppm err. | Off-By-X | Obs. MH   | Calc. MH  | Cleavage | Glycans Pos. | Protein Name                                                                       | Prot. Id | Scan Time                   |
|------------|------------|------|-------------------------------|-------------------------|---------|-------|----------------|---|-----------|-----------|----------|----------|-----------|-----------|----------|--------------|------------------------------------------------------------------------------------|----------|-----------------------------|
| 1   220... | 1          | 33   | R.VNLVELGVYVS[+648.2119]DIR.A | S11(Oglycan / 648.2113) | Hex(4)  | 884.9 | 566.0          | 2 | 1112.5286 | 1112.5463 | -15.90   |          | 2224.0500 | 2224.0853 | Specific | 11           | >sp P43575 PAU5_YEAST Seripauperin-5 OS=Saccharomyces cerevisiae (strain ATCC 2... | 3411     | 18.5004 sample=1 period=... |

| Prot. Rank | Protein Name                                                                                            | [Log Prob] | Best [Log Prob] | Best Score | # Spectra | # Uniq. Peps. | # Mod Peps. | % Cov. | # AAs | Intensity |
|------------|---------------------------------------------------------------------------------------------------------|------------|-----------------|------------|-----------|---------------|-------------|--------|-------|-----------|
| 2   2      | >sp P32612 PAU2_YEAST Seripauperin-2 OS=Saccharomyces cerevisiae (strain ATCC 204508 / S288c) OX=559... | 178.33     | 13.24           | 726.5      | 270       | 60            | 58          | 58.3   | 120   | 7.688e+6  |

Spectrum (double click to dock / undock)

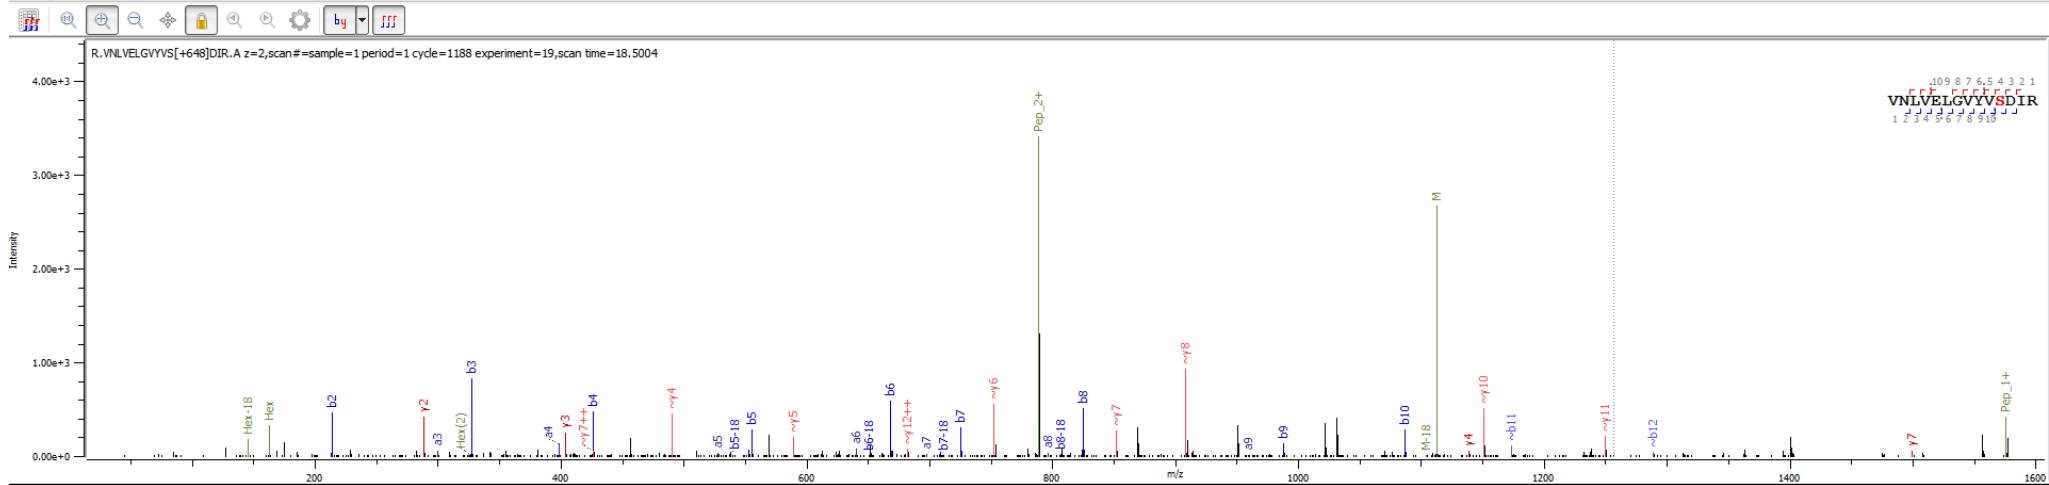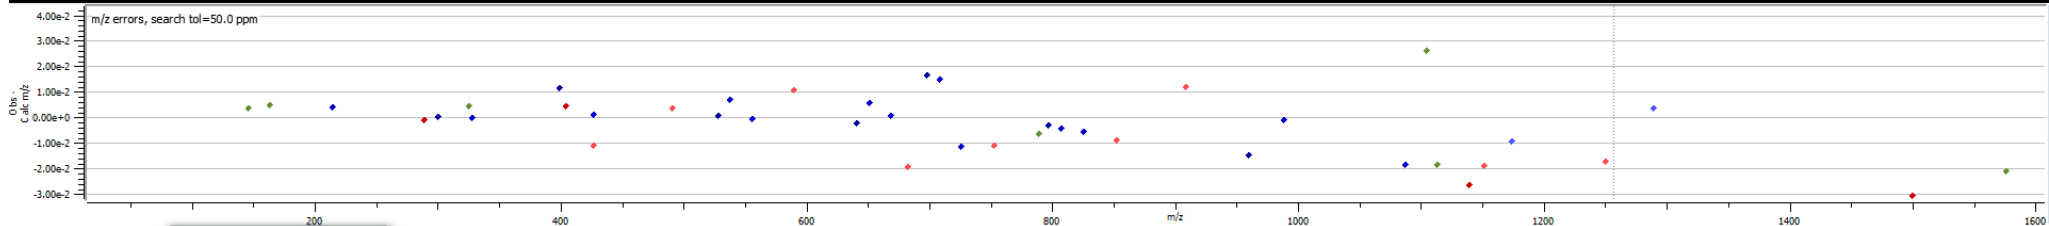

Sample S1 R.VNLVELGVYVS[+648.211]DIR.A

| PID        | Prot. Rank | Pos. | Sequence                     | Mods (variable)         | Glycans | Score | Delta Mo Score | z | Obs. m/z | Calc. m/z | ppm err. | Off-By-X | Obs. MH   | Calc. MH  | Cleavage | Glycans Pos. | Protein Name                                                                       | Prot. Id | Scan Time |
|------------|------------|------|------------------------------|-------------------------|---------|-------|----------------|---|----------|-----------|----------|----------|-----------|-----------|----------|--------------|------------------------------------------------------------------------------------|----------|-----------|
| 1   220... | 1          | 33   | R.VNLVELGVYVS[+648.211]DIR.A | S11(OGlycan / 648.2113) | Hex(4)  | 800.6 | 546.8          | 3 | 742.0241 | 742.0333  | -12.37   |          | 2224.0578 | 2224.0853 | Specific | 11           | >sp P43575 PAU5_YEAST Seripauperin-5 OS=Saccharomyces cerevisiae (strain ATCC 2... | 3411     | 18.5210   |

| Prot. Rank | Protein Name                                                                                            | [Log Prob] | Best [Log Prob] | Best Score | # Spectra | # Uniq. Peps. | # Mod Peps. | % Cov. | # AAs | Intensity |
|------------|---------------------------------------------------------------------------------------------------------|------------|-----------------|------------|-----------|---------------|-------------|--------|-------|-----------|
| 2   2      | >sp P32612 PAU2_YEAST Seripauperin-2 OS=Saccharomyces cerevisiae (strain ATCC 204508 / S288c) OX=559... | 178.33     | 13.24           | 726.5      | 270       | 60            | 58          | 58.3   | 120   | 7.688e+6  |

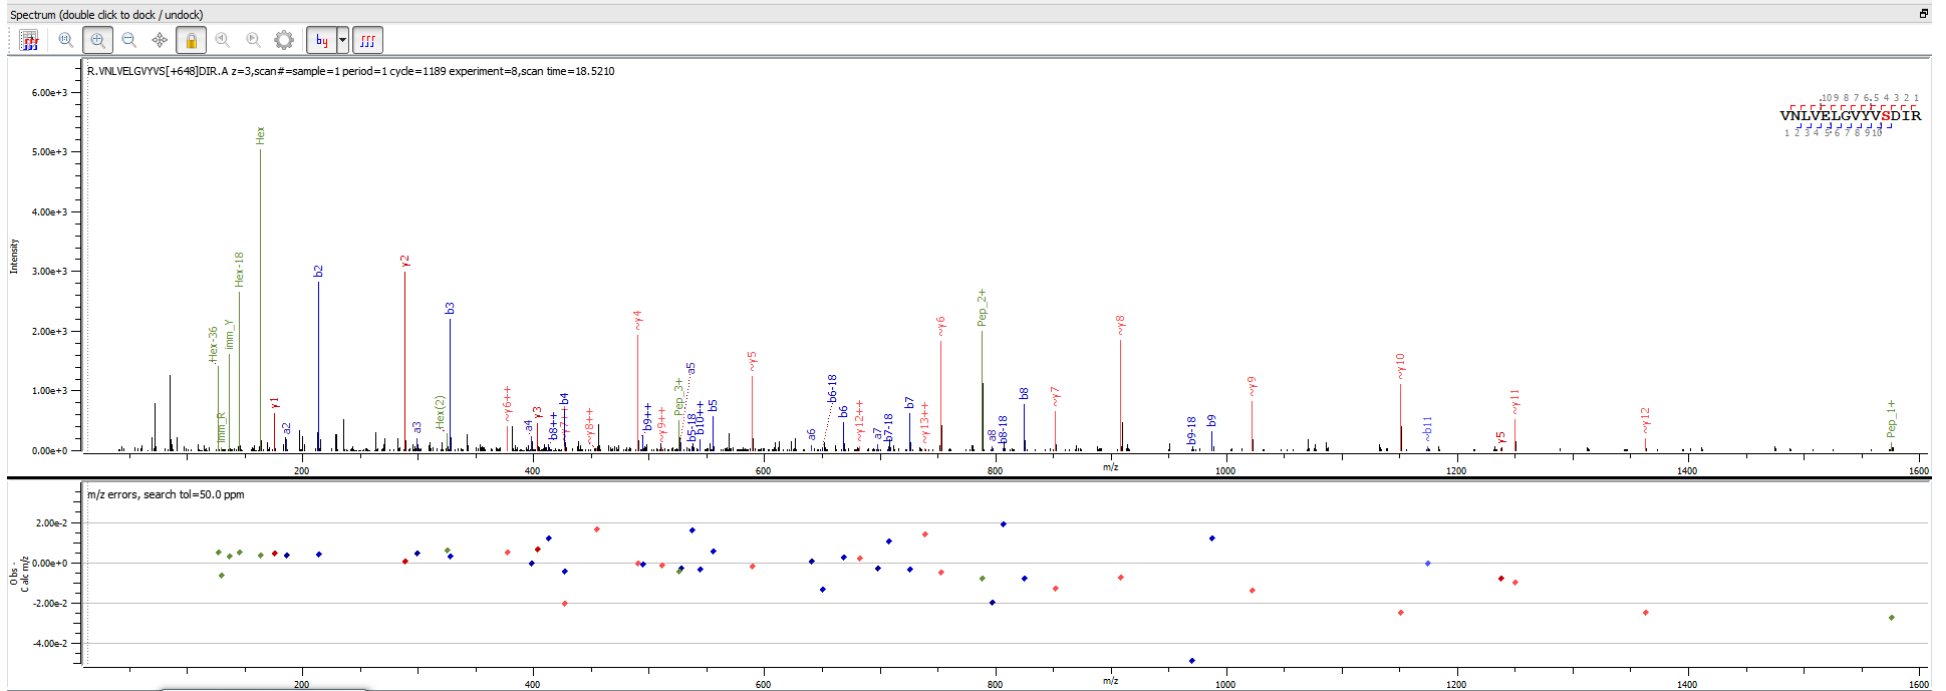

Sample S1 R.VNLVELGVYVS[+648.211]DIR.A



| PID | Prot. Rank | Pos. | Sequence | Mods (variable)                  | Glycans                 | Score  | delta Mo Score | z     | Obs. m/z | Calc. m/z | ppm err. | Off-By-X | Obs. MH   | Calc. MH  | Cleavage | Glycans Pos. | Protein Name                                                                       | Prot. Id | Scan Time |                 |
|-----|------------|------|----------|----------------------------------|-------------------------|--------|----------------|-------|----------|-----------|----------|----------|-----------|-----------|----------|--------------|------------------------------------------------------------------------------------|----------|-----------|-----------------|
| 1   | 210...     | 1    | 29       | D.ERVNLVELGVYVS[+324.10565]DIR.A | SL3(OGlycan / 324.1056) | Hex(2) | 902.7          | 670.1 | 3        | 729.0343  | 729.0460 | -16.03   | 2185.0884 | 2185.1234 | NRagged  | 13           | >sp Q3E770 PAU9_YEAST Seripauperin-9 OS=Saccharomyces cerevisiae (strain ATCC 2... | 3461     | 17.8142   | sample=1 period |

| Prot. Rank | Protein Name                                                                                            | [Log Prob] | Best [Log Prob] | Best Score | # Spectra | # Uniq. Peps. | # Mod Peps. | % Cov. | # AAs | Intensity |
|------------|---------------------------------------------------------------------------------------------------------|------------|-----------------|------------|-----------|---------------|-------------|--------|-------|-----------|
| 1          | >sp Q3E770 PAU9_YEAST Seripauperin-9 OS=Saccharomyces cerevisiae (strain ATCC 204508 / S288c) OX=559... | 248.32     | 15.68           | 955.8      | 342       | 58            | 55          | 67.5   | 120   | 1.797e+7  |

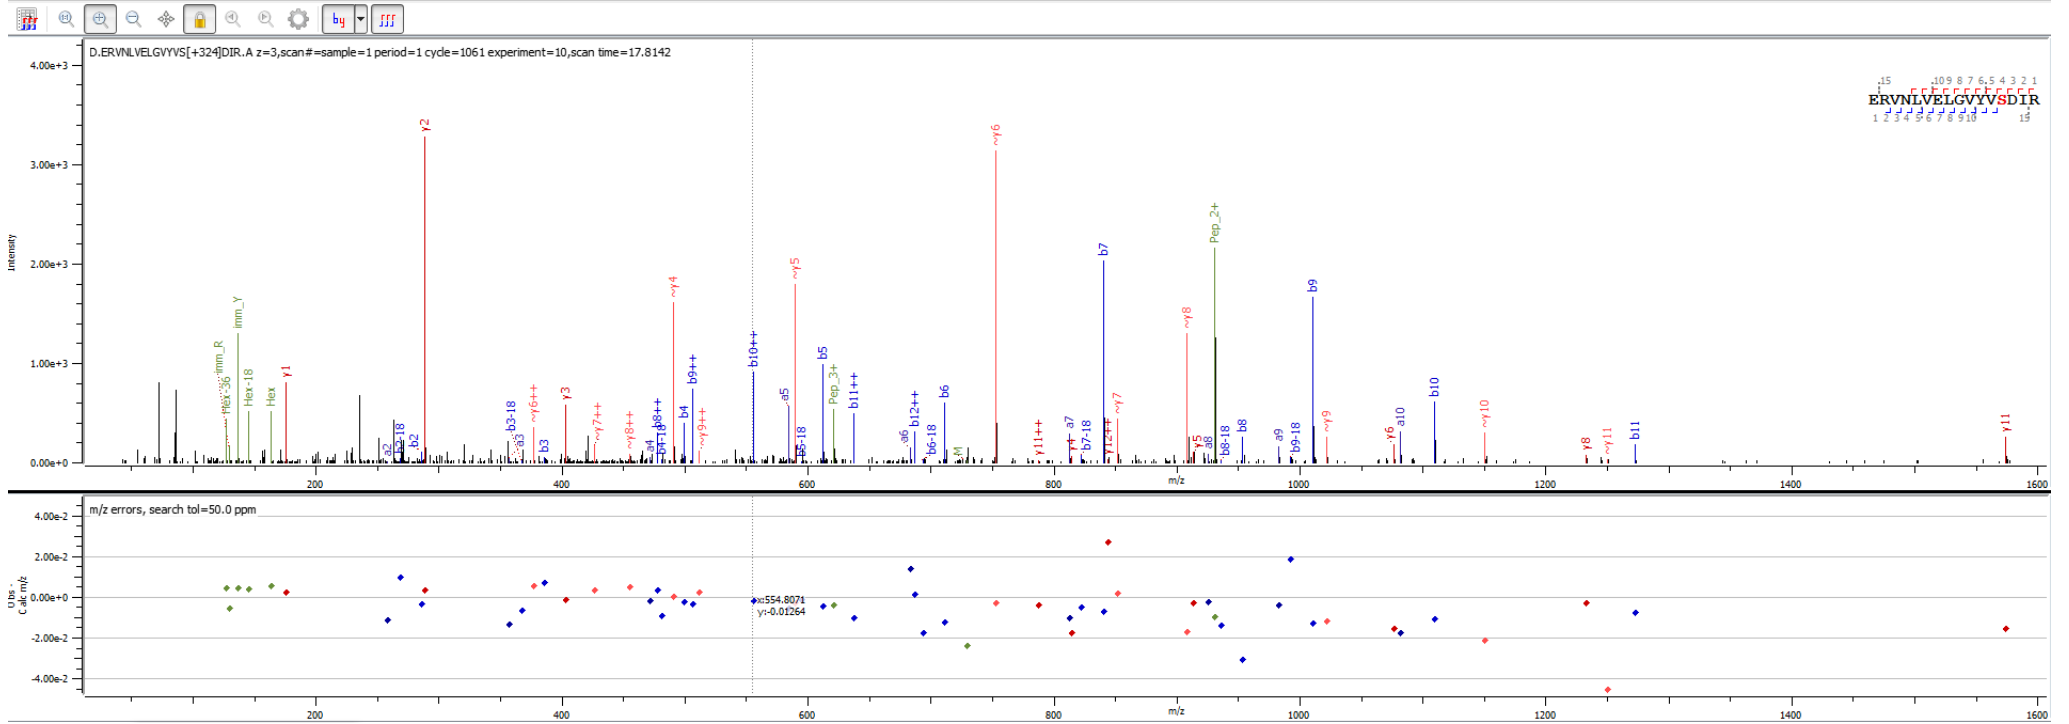

Sample S3 D.ERVNLVELGVYVS[+324.106]DIR.A

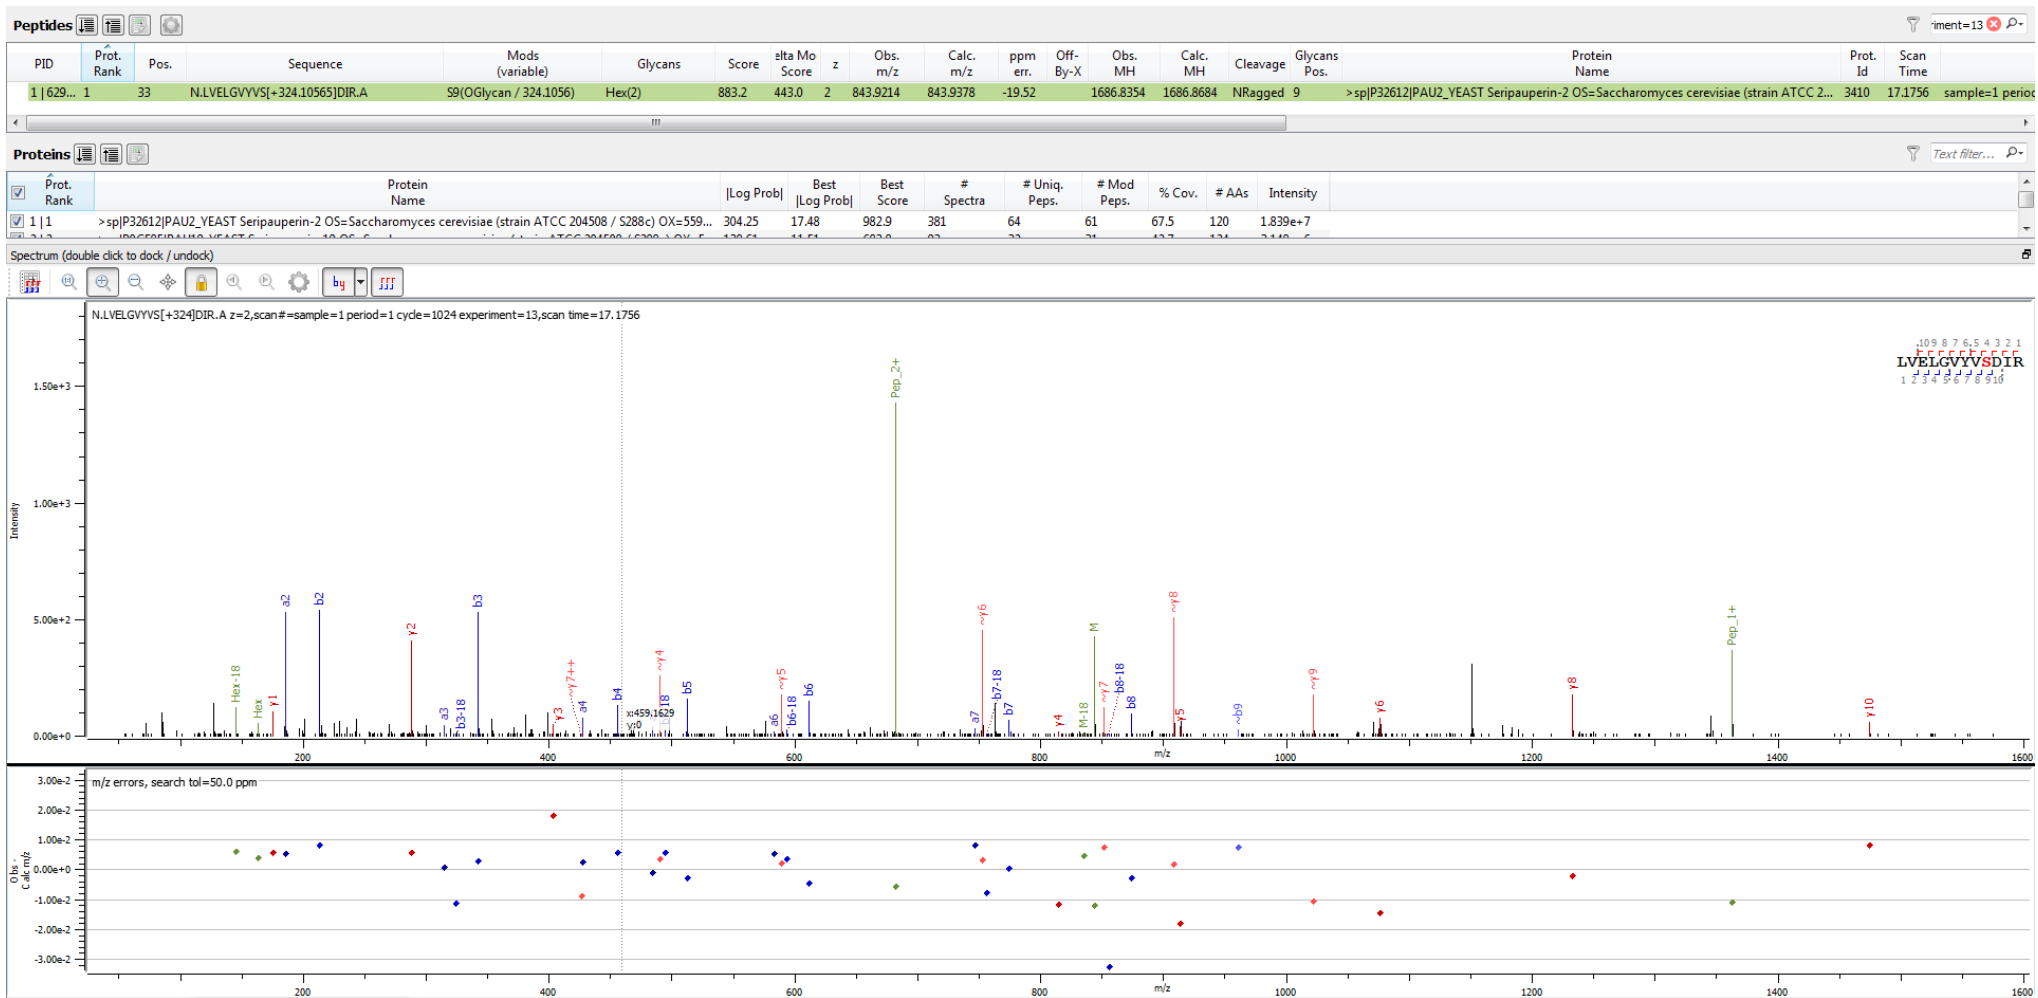

Sample S4 N.LVELGVYVS[+324.106]DIR.A

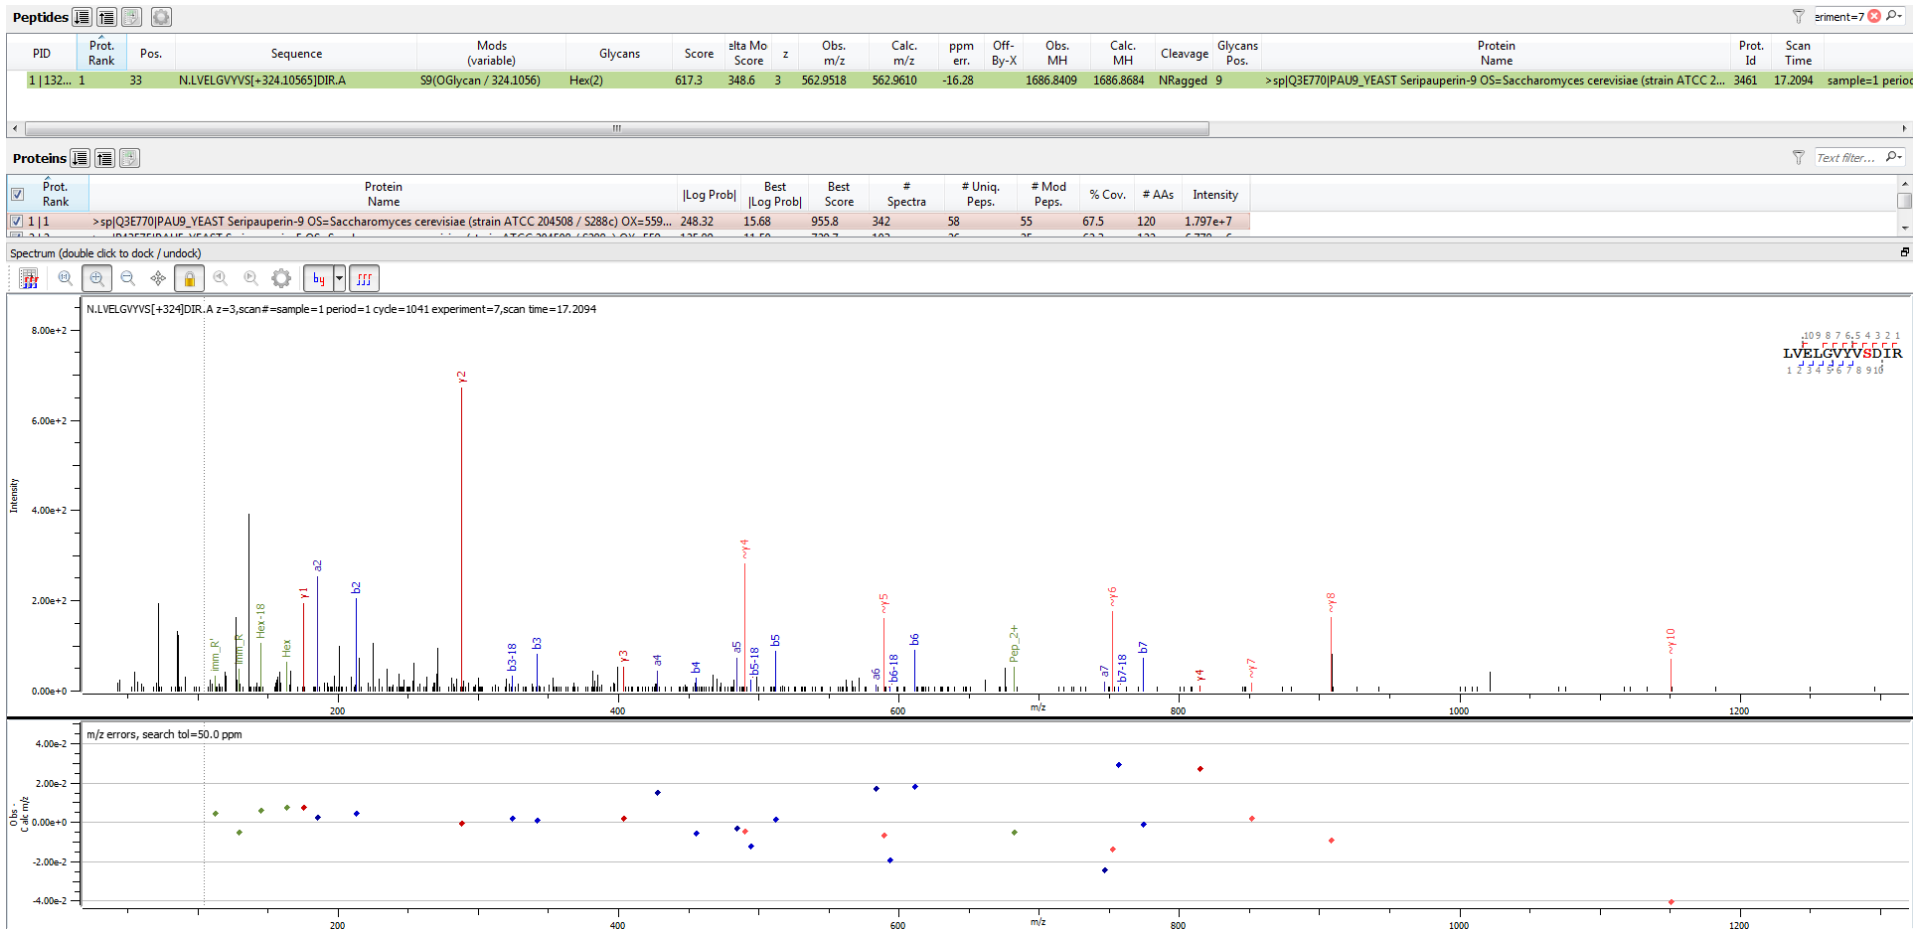

Sample S3 N.LVELGVYVS[+324.106]DIR.A

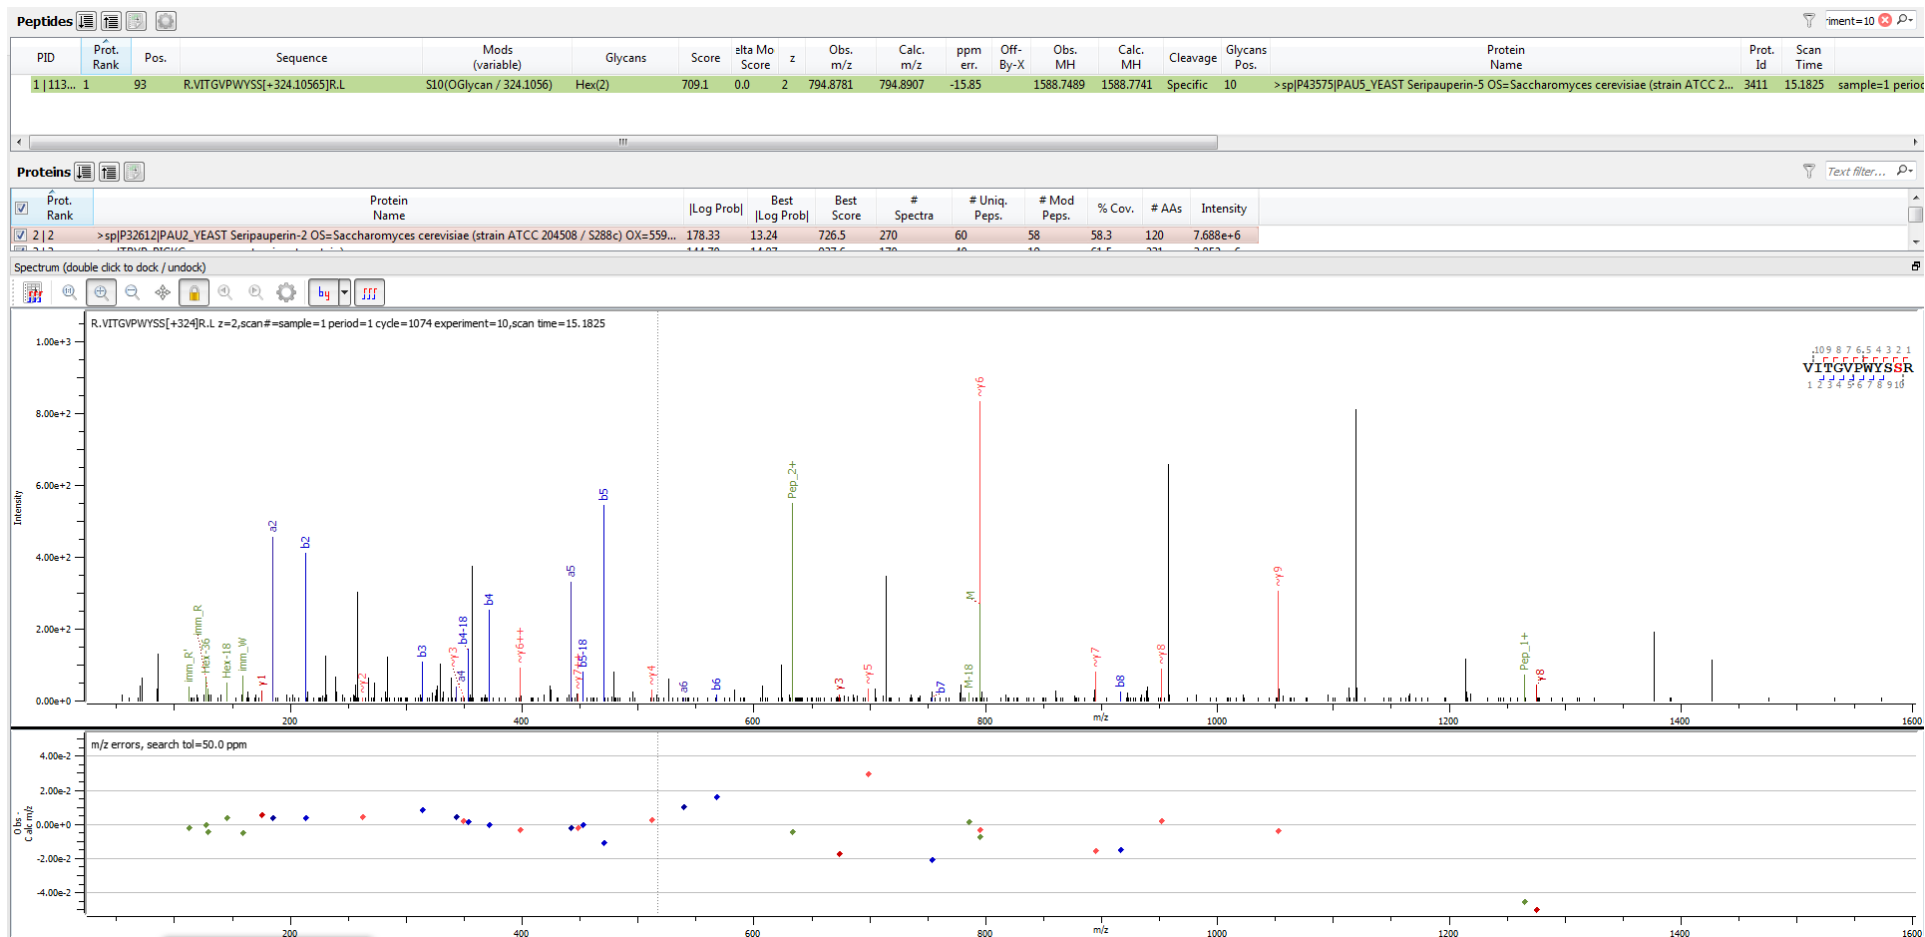

Sample S1 R.VITGVPWYSS[+324.106]SR.L

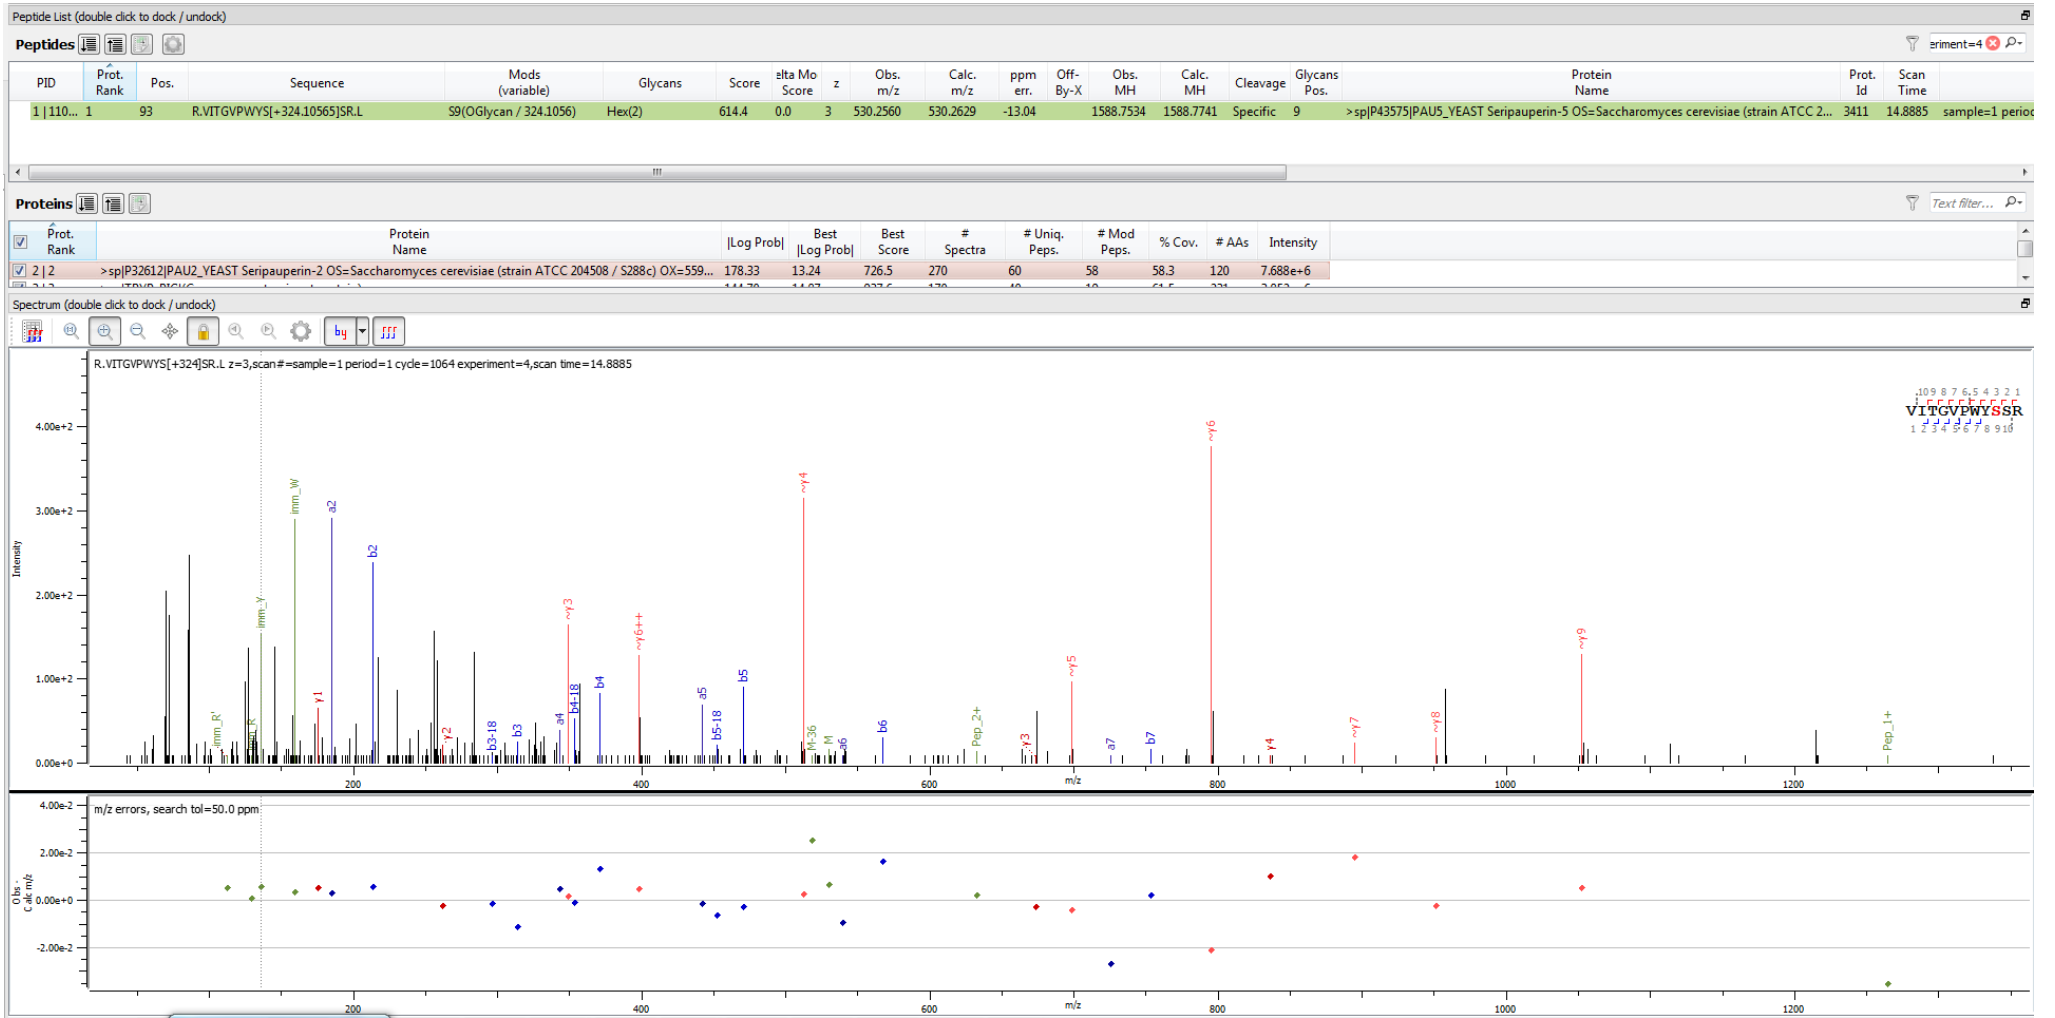

Sample S1 R.VITGVPWYS[+324.106]SR.L

| PID | Prot. Rank | Pos. | Sequence                    | Mods (variable)        | Glycans | Score | delta Mo Score | z | Obs. m/z | Calc. m/z | ppm err. | Off-By-X | Obs. MH   | Calc. MH  | Cleavage | Glycans Pos. | Protein Name                                                                       | Prot. Id | Scan Time |
|-----|------------|------|-----------------------------|------------------------|---------|-------|----------------|---|----------|-----------|----------|----------|-----------|-----------|----------|--------------|------------------------------------------------------------------------------------|----------|-----------|
| 1   | 110...     | 93   | R.VITGVPWYS[+486.15847]SR.L | S9(OGlycan / 486.1585) | Hex(3)  | 747.1 | 11.2           | 2 | 875.9020 | 875.9171  | -17.27   |          | 1750.7967 | 1750.8269 | Specific | 9            | >sp P43575 PAU5_YEAST Seripauperin-5 OS=Saccharomyces cerevisiae (strain ATCC 2... | 3411     | 14.8687   |

| Prot. Rank | Protein Name                                                                                            | [Log Prob] | Best [Log Prob] | Best Score | # Spectra | # Uniq. Peps. | # Mod Peps. | % Cov. | # AAs | Intensity |
|------------|---------------------------------------------------------------------------------------------------------|------------|-----------------|------------|-----------|---------------|-------------|--------|-------|-----------|
| 2          | >sp P32612 PAU2_YEAST Seripauperin-2 OS=Saccharomyces cerevisiae (strain ATCC 204508 / S288c) OX=559... | 178.33     | 13.24           | 726.5      | 270       | 60            | 58          | 58.3   | 120   | 7.688e+6  |

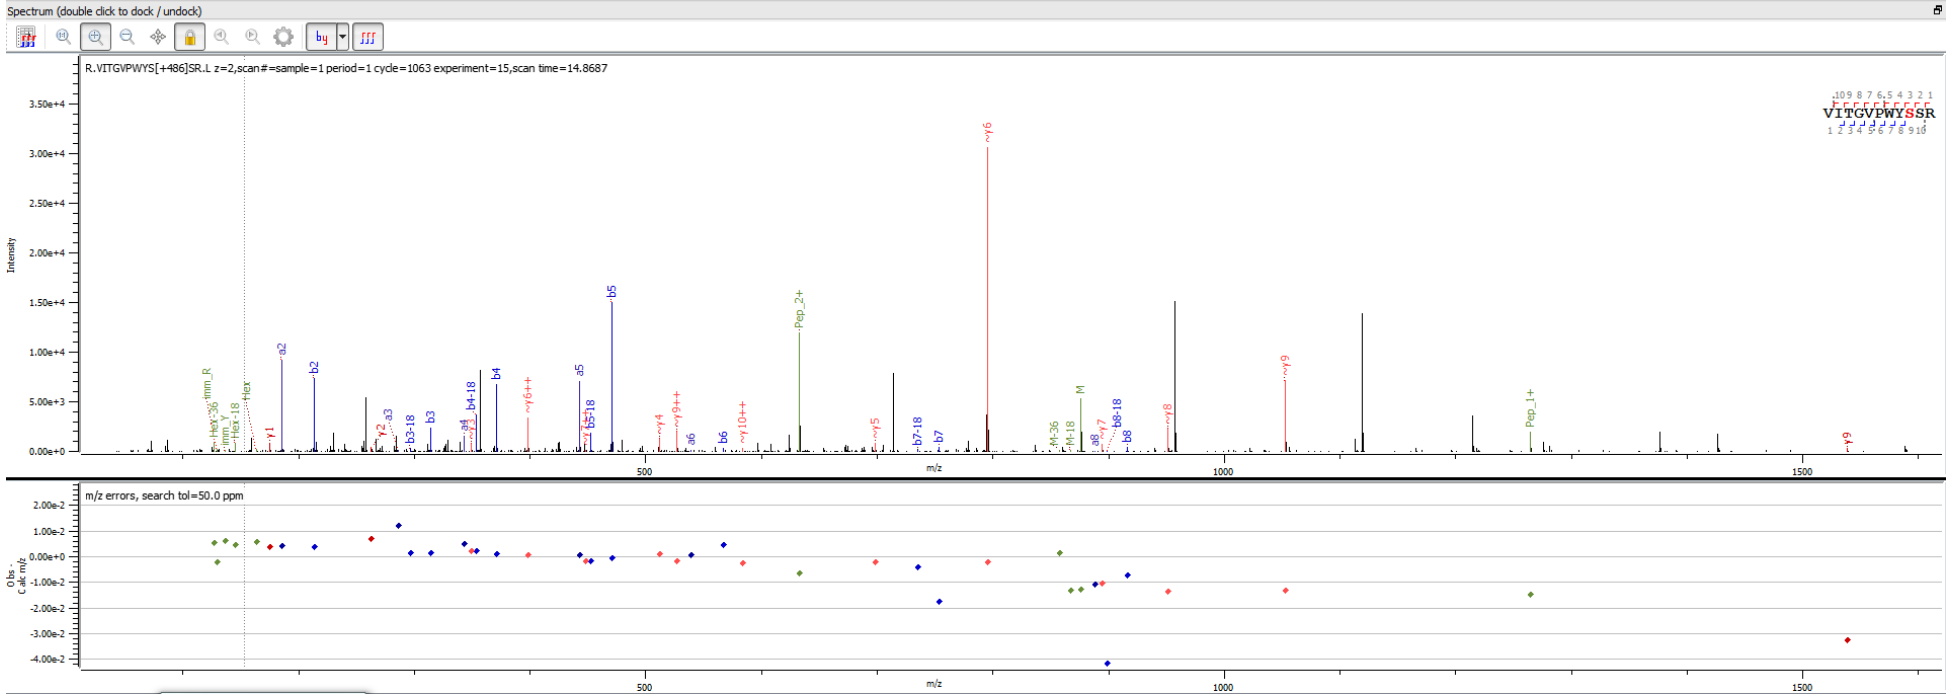

Sample S1 R.VITGVPWYS[+486.158]SR.L

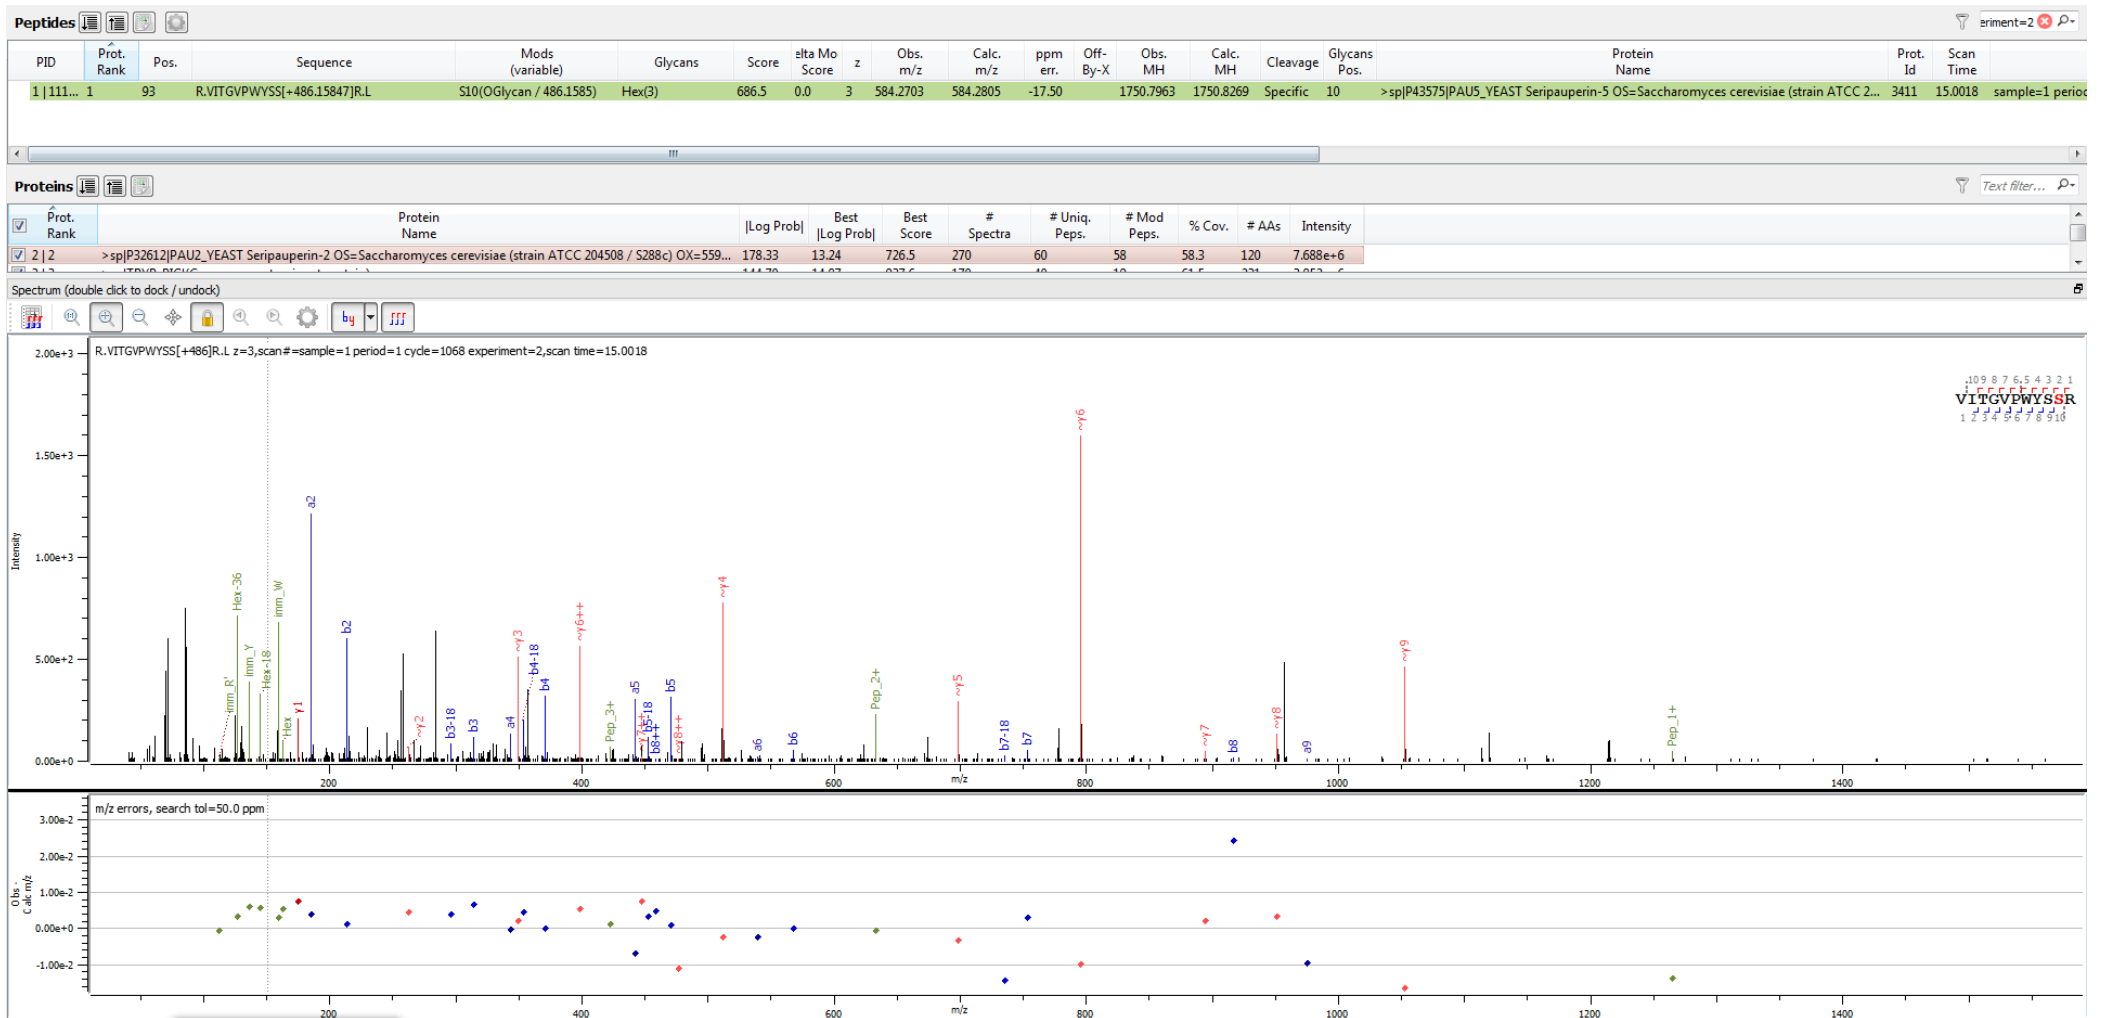

Sample S1 R.VITGVPWYS[+486.158]SR.L

| PID        | Prot. Rank | Pos. | Sequence                    | Mods (variable)        | Glycans | Score | alta Mo Score | z | Obs. m/z | Calc. m/z | ppm err. | Off-By-X | Obs. MH   | Calc. MH  | Cleavage | Glycans Pos. | Protein Name                                                                       | Prot. Id | Scan Time |
|------------|------------|------|-----------------------------|------------------------|---------|-------|---------------|---|----------|-----------|----------|----------|-----------|-----------|----------|--------------|------------------------------------------------------------------------------------|----------|-----------|
| 1   108... | 1          | 93   | R.VITGVPWYS[+648.21129]SR.L | S9(O)Glycan / 648.2113 | Hex(4)  | 674.6 | 0.0           | 2 | 956.9261 | 956.9435  | -18.15   |          | 1912.8450 | 1912.8797 | Specific | 9            | >sp P43575 PAU5_YEAST Seripauperin-5 OS=Saccharomyces cerevisiae (strain ATCC 2... | 3411     | 14.6700   |

| Prot. Rank | Protein Name                                                                                            | [Log Prob] | Best [Log Prob] | Best Score | # Spectra | # Uniq. Peps. | # Mod Peps. | % Cov. | # AAs | Intensity |
|------------|---------------------------------------------------------------------------------------------------------|------------|-----------------|------------|-----------|---------------|-------------|--------|-------|-----------|
| 2   2      | >sp P32612 PAU2_YEAST Seripauperin-2 OS=Saccharomyces cerevisiae (strain ATCC 204508 / S288c) OX=559... | 178.33     | 13.24           | 726.5      | 270       | 60            | 58          | 58.3   | 120   | 7.688e+6  |

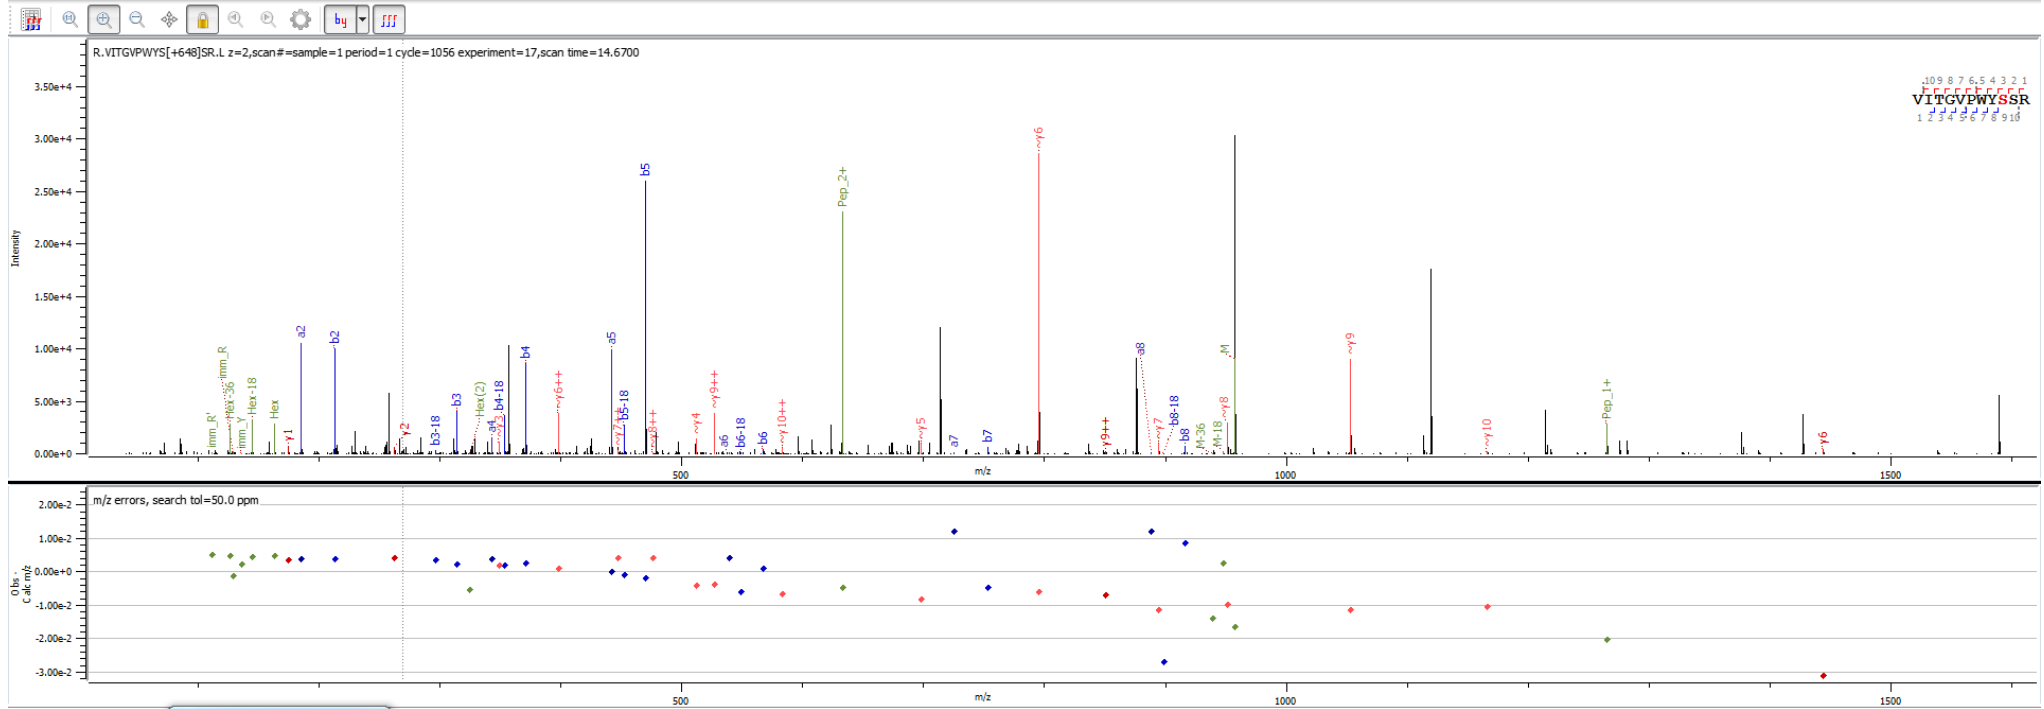

Sample S1 R.VITGVPWYS[+648.211]SR.L



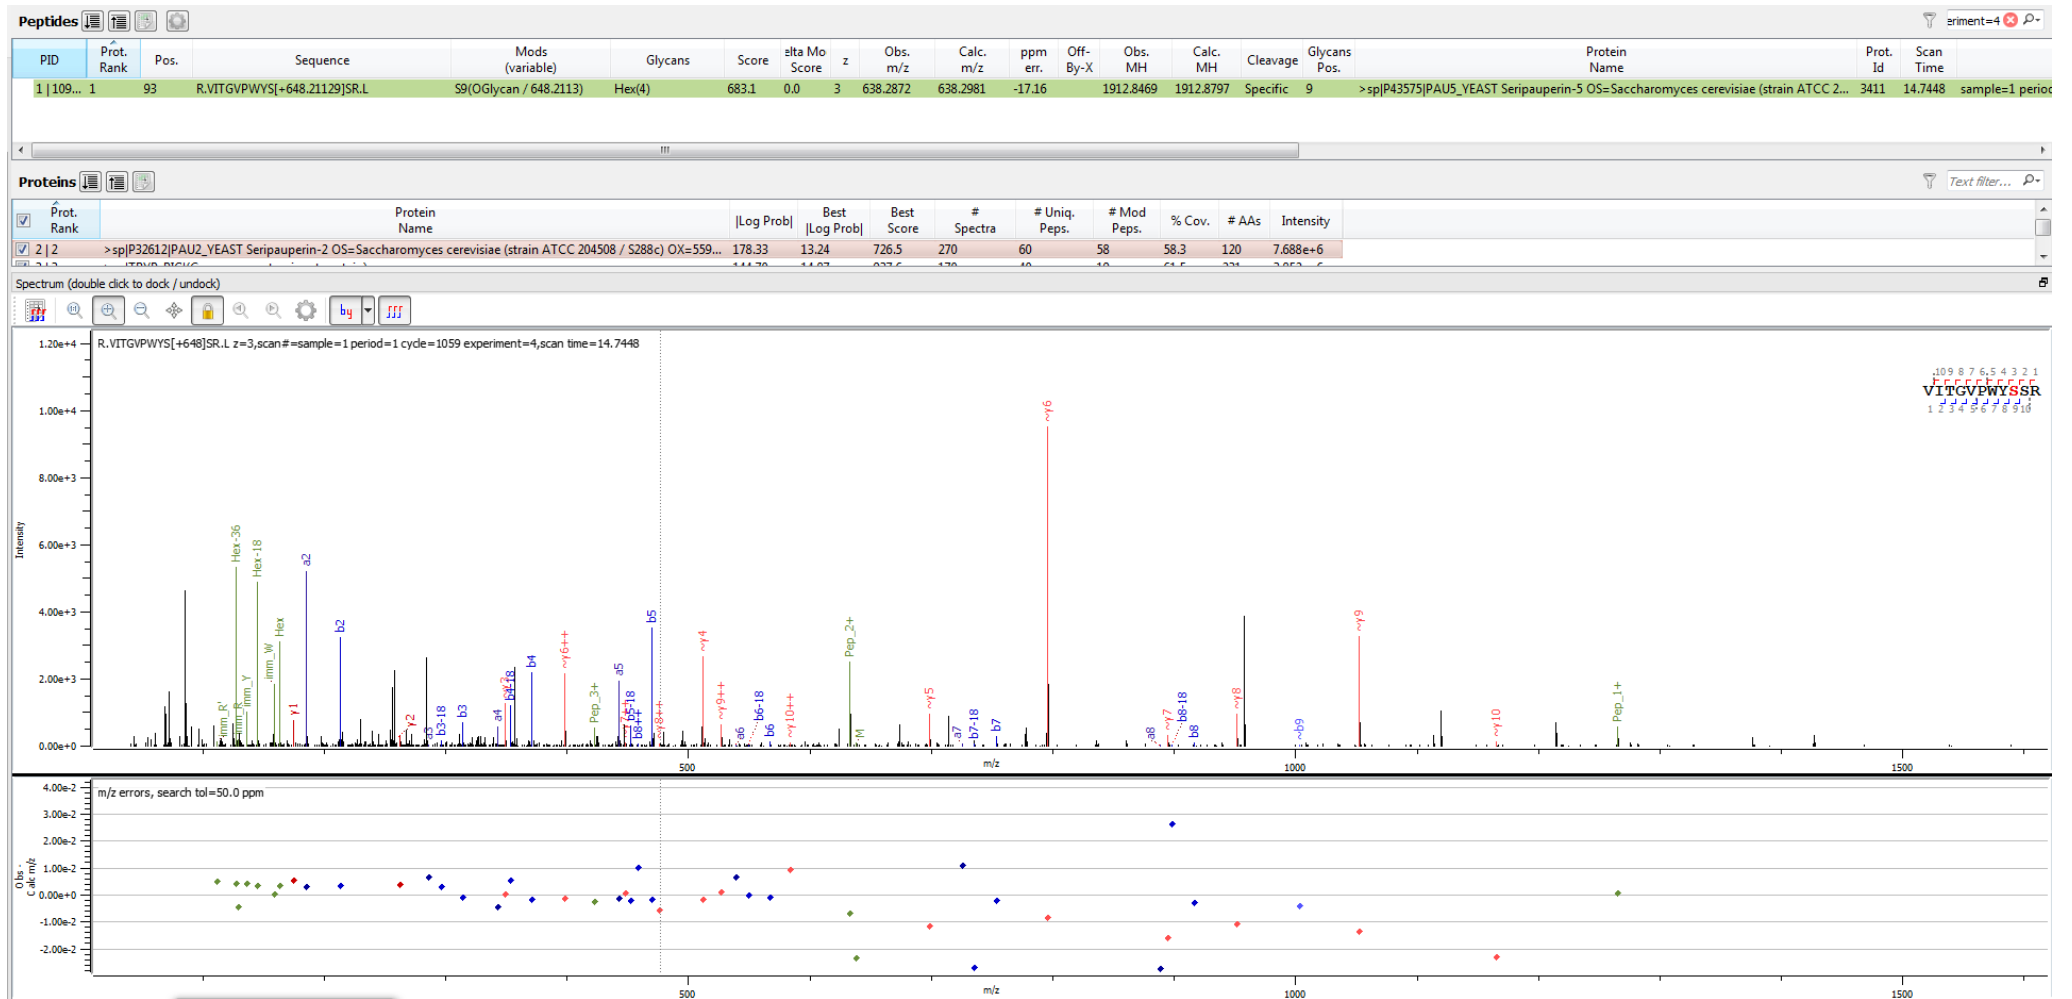

Sample S1 R.VITGVPWYS[+648.211]SR.L

Peptide List (double click to dock / undock)

**Peptides** iment=14

| PID | Prot. Rank | Pos. | Sequence | Mods (variable)             | Glycans                | Score  | Delta Mo Score | z   | Obs. m/z | Calc. m/z | ppm err.  | Off-By-X | Obs. MH   | Calc. MH  | Cleavage | Glycans Pos. | Protein Name                                                                       | Prot. Id | Scan Time                 |
|-----|------------|------|----------|-----------------------------|------------------------|--------|----------------|-----|----------|-----------|-----------|----------|-----------|-----------|----------|--------------|------------------------------------------------------------------------------------|----------|---------------------------|
| 1   | 1914...    | 3    | 93       | R.VITGVPWYS[+810.26412]SR.L | S9(Oglycan / 810.2641) | Hex(5) | 650.6          | 1.2 | 2        | 1037.9507 | 1037.9699 | -18.55   | 2074.8941 | 2074.9325 | Specific | 9            | >sp P43575 PAU5_YEAST Seripauperin-5 OS=Saccharomyces cerevisiae (strain ATCC 2... | 3411     | 14.6266 sample=1 period=1 |

**Proteins** Text filter...

| Prot. Rank | Protein Name | [Log Prob]                                                                                              | Best [Log Prob] | Best Score | # Spectra | # Uniq. Peps. | # Mod Peps. | % Cov. | # AAs | Intensity |          |
|------------|--------------|---------------------------------------------------------------------------------------------------------|-----------------|------------|-----------|---------------|-------------|--------|-------|-----------|----------|
| 1          | 1            | >sp Q3E770 PAU9_YEAST Seripauperin-9 OS=Saccharomyces cerevisiae (strain ATCC 204508 / S288c) OX=559... | 288.60          | 16.66      | 988.6     | 452           | 61          | 56     | 60.8  | 120       | 1.023e+7 |
| 2          | 2            | >sp Q07987 PAU23_YEAST Seripauperin-23 OS=Saccharomyces cerevisiae (strain ATCC 204508 / S288c) OX=5... | 160.38          | 13.28      | 718.6     | 124           | 39          | 36     | 43.5  | 124       | 2.323e+6 |
| 3          | 3            | >sp P43575 PAU5_YEAST Seripauperin-5 OS=Saccharomyces cerevisiae (strain ATCC 204508 / S288c) OX=559... | 142.55          | 14.15      | 737.1     | 167           | 35          | 33     | 42.6  | 122       | 6.136e+6 |
| 4          | 4            | >en K2C1_HUMAN Common contaminant protein)                                                              | 101.54          | 13.43      | 953.1     | 37            | 11          | 0      | 20.4  | 643       | 1.801e+5 |

Spectrum (double click to dock / undock)

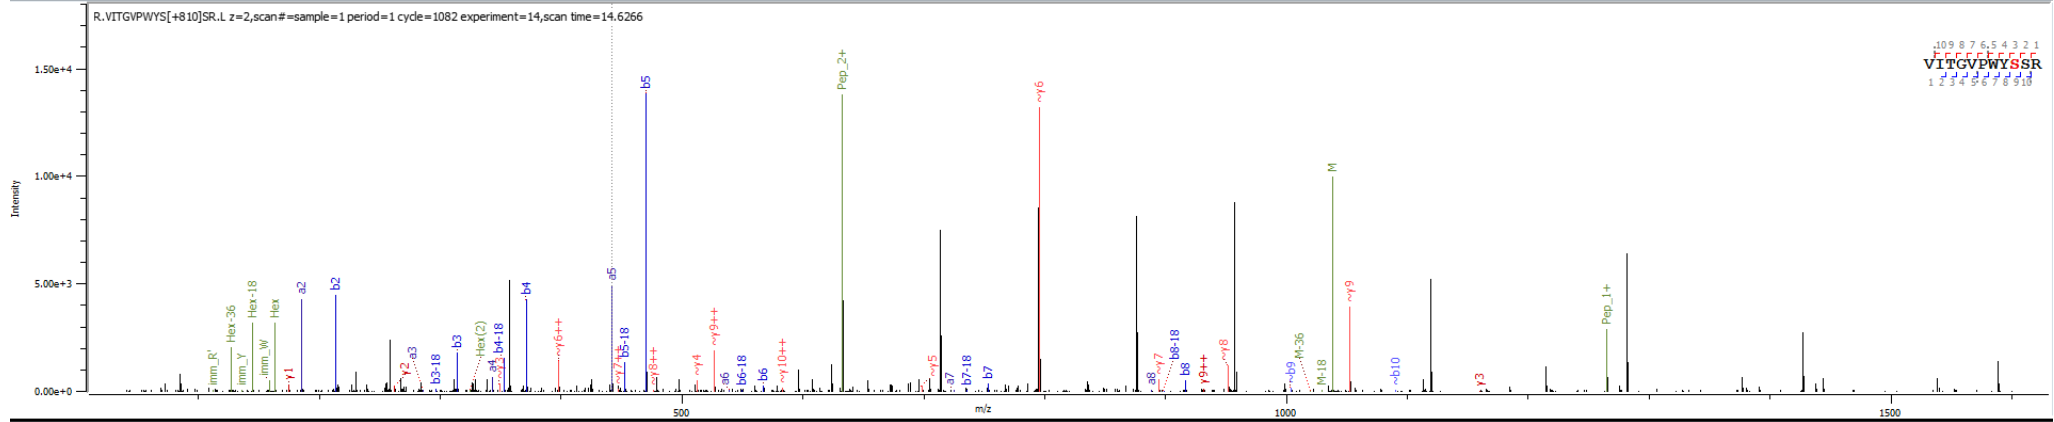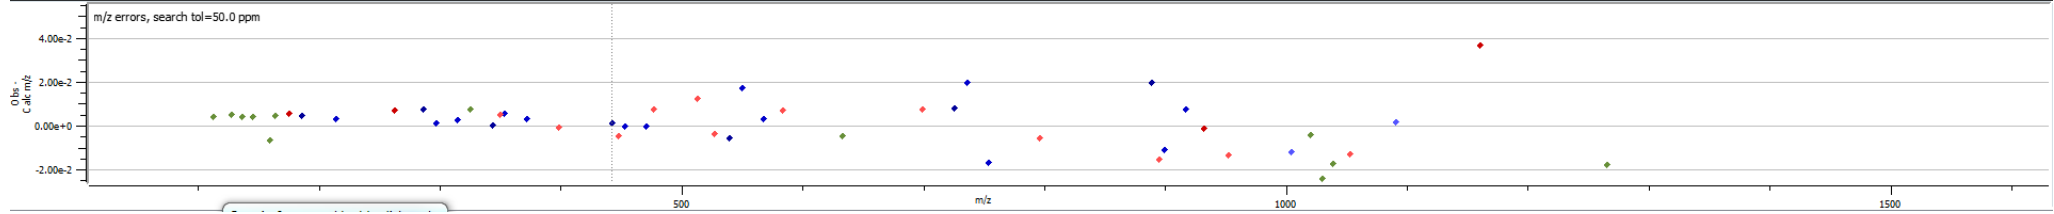

Sample S6 R.VITGVPWYS[+810.264]SR.L

Peptides

| PID | Prot. Rank | Pos. | Sequence                  | Mods (variable)        | Glycans | Score | delta Mo Score | z | Obs. m/z | Calc. m/z | ppm err. | Off-By-X | Obs. MH   | Calc. MH  | Cleavage | Glycans Pos. | Protein Name                                                                       | Prot. Id | Scan Time |
|-----|------------|------|---------------------------|------------------------|---------|-------|----------------|---|----------|-----------|----------|----------|-----------|-----------|----------|--------------|------------------------------------------------------------------------------------|----------|-----------|
| 1   | 1          | 93   | R.VITGVPWYS[+810.264]SR.L | S9(OGlycan / 810.2641) | Hex(5)  | 725.4 | 1.2            | 3 | 692.3033 | 692.3157  | -17.91   |          | 2074.8954 | 2074.9325 | Specific | 9            | >sp P43575 PAU5_YEAST Seripauperin-5 OS=Saccharomyces cerevisiae (strain ATCC 2... | 3411     | 14.5472   |

Proteins

| Prot. Rank | Protein Name                                                                                            | [Log Prob] | Best [Log Prob] | Best Score | # Spectra | # Uniq. Peps. | # Mod Peps. | % Cov. | # AAs | Intensity |
|------------|---------------------------------------------------------------------------------------------------------|------------|-----------------|------------|-----------|---------------|-------------|--------|-------|-----------|
| 1          | >sp P43575 PAU5_YEAST Seripauperin-5 OS=Saccharomyces cerevisiae (strain ATCC 204508 / S288c) OX=559... | 327.47     | 16.74           | 1004.1     | 632       | 70            | 67          | 68.9   | 122   | 3.742e+7  |
| 2          | >sp P32612 PAU2_YEAST Seripauperin-2 OS=Saccharomyces cerevisiae (strain ATCC 204508 / S288c) OX=559... | 178.33     | 13.24           | 726.5      | 270       | 60            | 58          | 58.3   | 120   | 7.688e+6  |

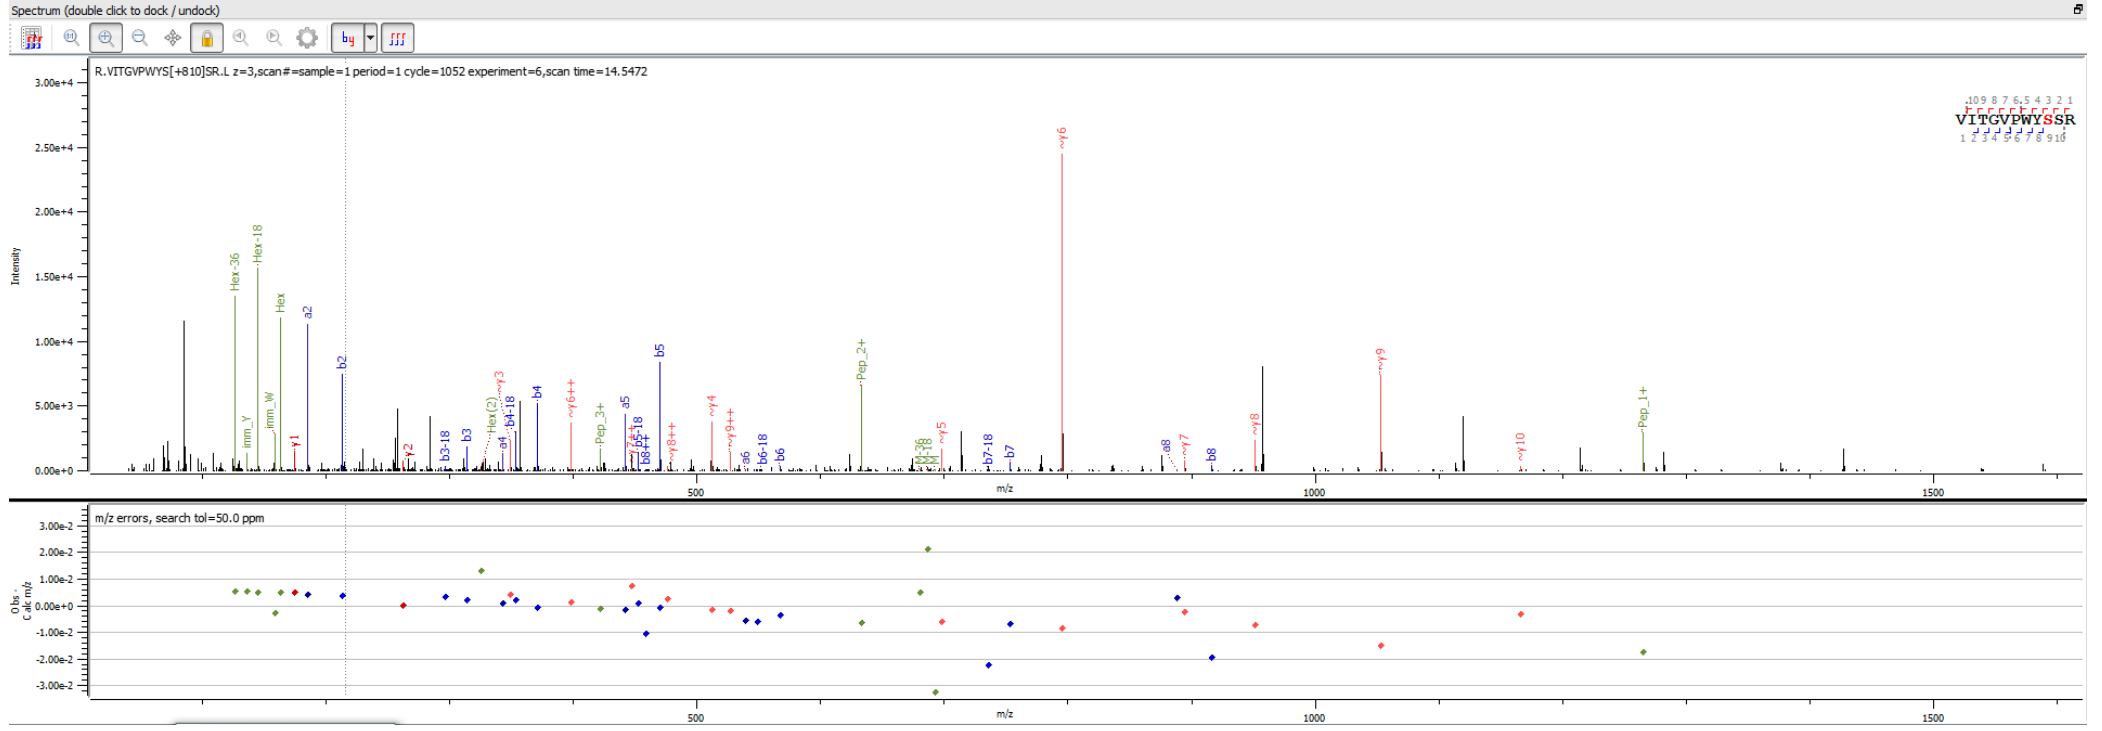

Sample S1 R.VITGVPWYS[+810.264]SR.L

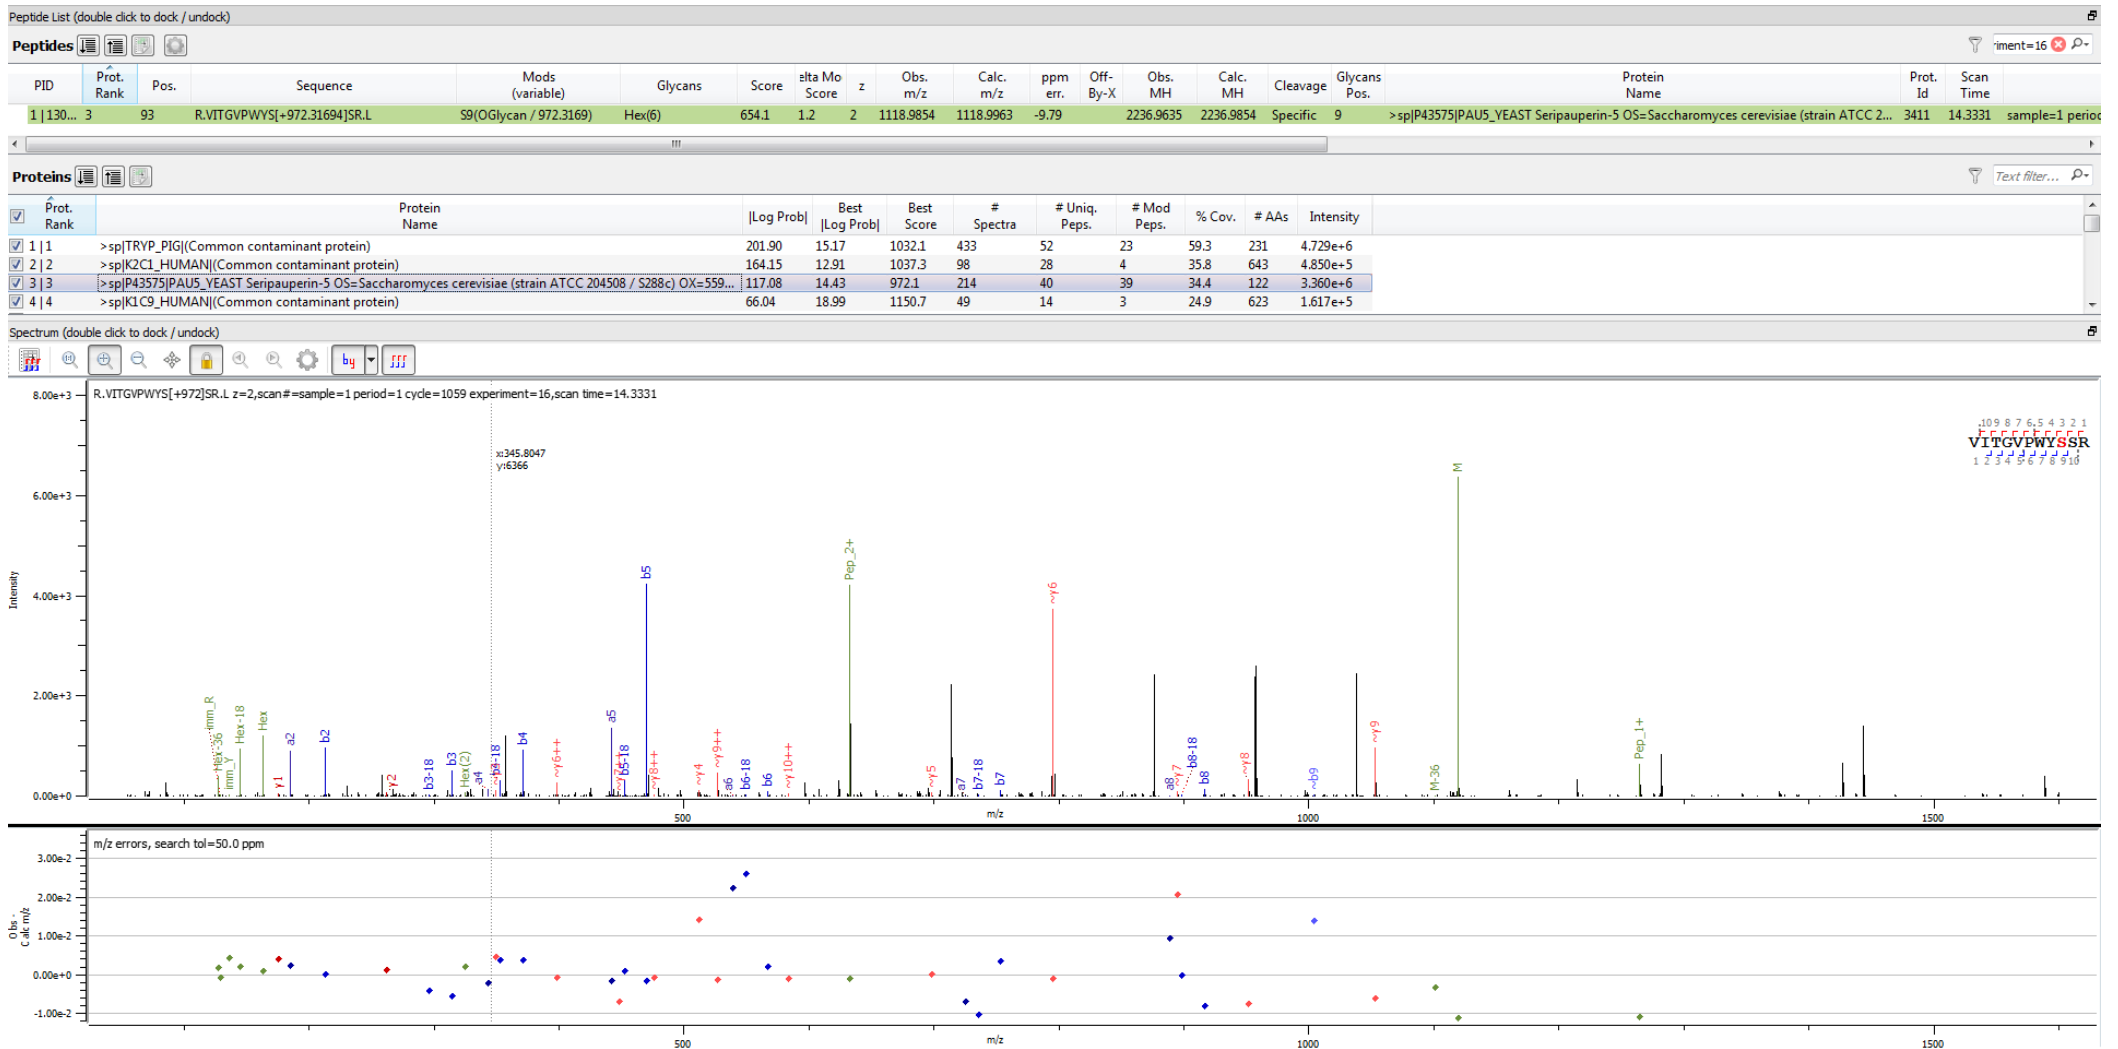

Sample S2 R.VITGVPWYS[+972.317]SR.L

| PID        | Prot. Rank | Pos. | Sequence                    | Mods (variable)        | Glycans | Score | ΔMo Score | z | Obs. m/z | Calc. m/z | ppm err. | Off-By-X | Obs. MH   | Calc. MH  | Cleavage | Glycans Pos. | Protein Name                                                                       | Prot. Id | Scan Time |
|------------|------------|------|-----------------------------|------------------------|---------|-------|-----------|---|----------|-----------|----------|----------|-----------|-----------|----------|--------------|------------------------------------------------------------------------------------|----------|-----------|
| 1   180... | 1          | 93   | R.VITGVPWYS[+972.31694]SR.L | S9(Oglycan / 972.3169) | Hex(6)  | 712.2 | 1.2       | 3 | 746.3205 | 746.3333  | -17.15   |          | 2236.9470 | 2236.9854 | Specific | 9            | >sp P43575 PAU5_YEAST Seripauperin-5 OS=Saccharomyces cerevisiae (strain ATCC 2... | 3411     | 14.2101   |

| Prot. Rank | Protein Name                                                                                            | [Log Prob] | Best [Log Prob] | Best Score | # Spectra | # Uniq. Peps. | # Mod Peps. | % Cov. | # AAs | Intensity |
|------------|---------------------------------------------------------------------------------------------------------|------------|-----------------|------------|-----------|---------------|-------------|--------|-------|-----------|
| 1   1      | >sp P43575 PAU5_YEAST Seripauperin-5 OS=Saccharomyces cerevisiae (strain ATCC 204508 / S288c) OX=559... | 327.47     | 16.74           | 1004.1     | 632       | 70            | 67          | 68.9   | 122   | 3.742e+7  |
| 2   2      | >sp P32612 PAU2_YEAST Seripauperin-2 OS=Saccharomyces cerevisiae (strain ATCC 204508 / S288c) OX=559... | 178.33     | 13.24           | 726.5      | 270       | 60            | 58          | 58.3   | 120   | 7.688e+6  |

Spectrum (double click to dock / undock)

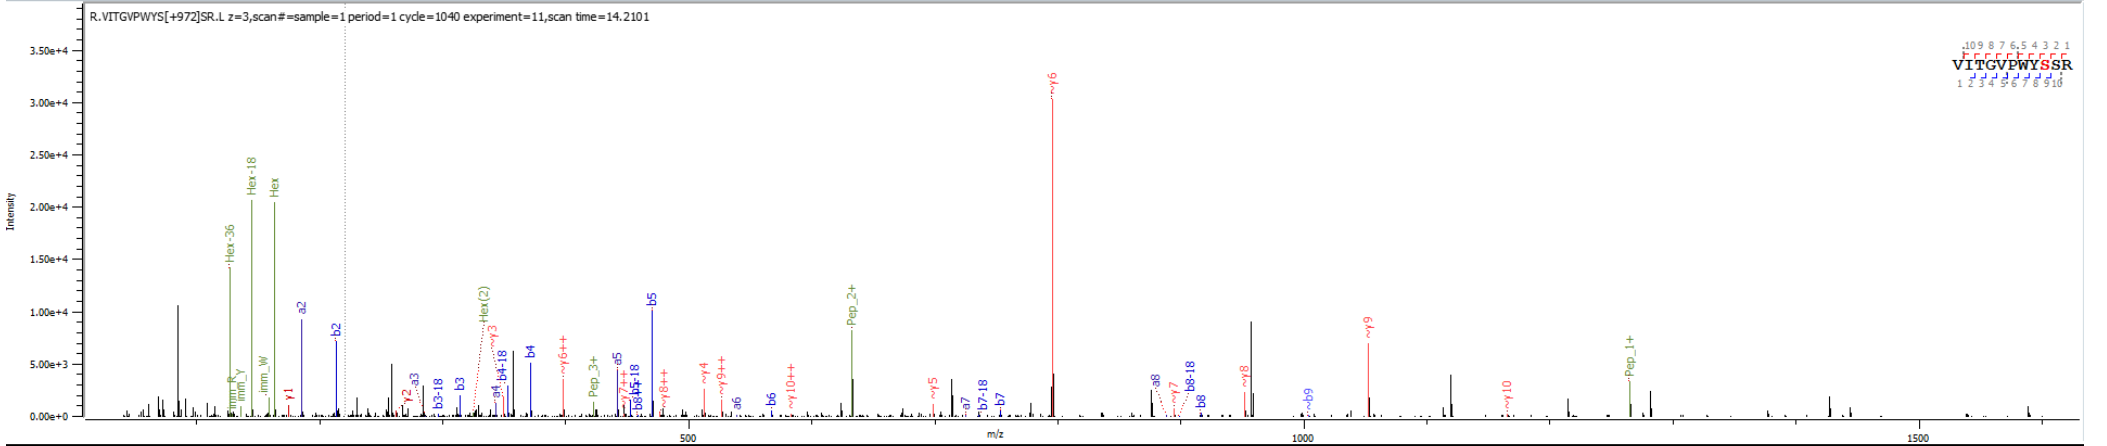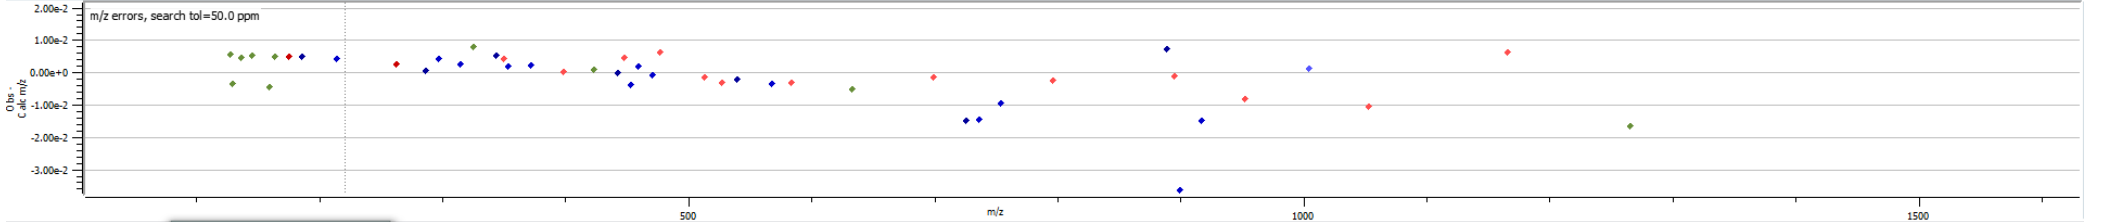

Sample S1 R.VITGVPWYS[+972.317]SR.L

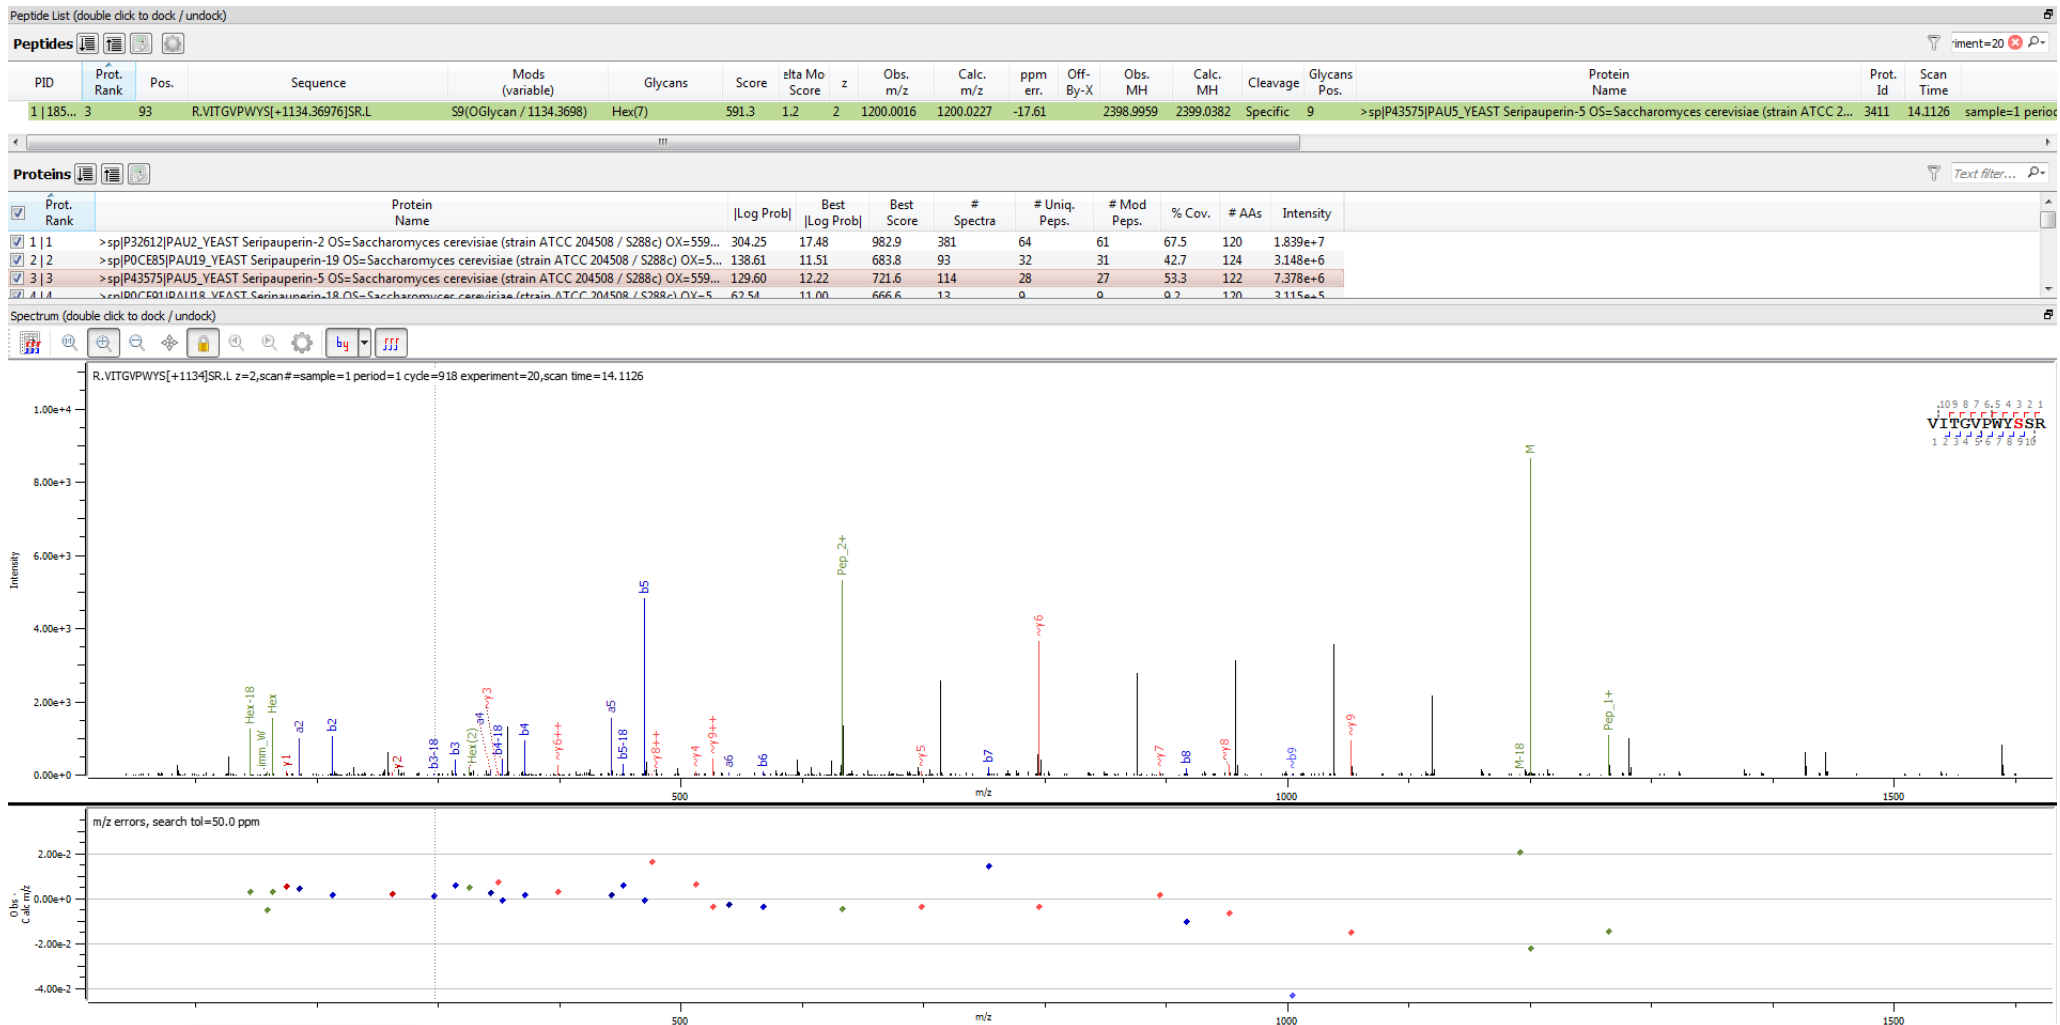

Sample S4 R.VITGVPWYS[+1134.370]SR.L

| PID        | Prot. Rank | Pos. | Sequence                     | Mods (variable)         | Glycans | Score | alta Mo Score | z | Obs. m/z | Calc. m/z | ppm err. | Off-By-X | Obs. MH   | Calc. MH  | Cleavage | Glycans Pos. | Protein Name                                                                       | Prot. Id | Scan Time |
|------------|------------|------|------------------------------|-------------------------|---------|-------|---------------|---|----------|-----------|----------|----------|-----------|-----------|----------|--------------|------------------------------------------------------------------------------------|----------|-----------|
| 1   180... | 1          | 93   | R.VITGVPWYS[+1134.36976]SR.L | S9(Oglycan / 1134.3698) | Hex(7)  | 673.9 | 1.2           | 3 | 800.3351 | 800.3509  | -19.80   |          | 2398.9907 | 2399.0382 | Specific | 9            | >sp P43575 PAU5_YEAST Seripauperin-5 OS=Saccharomyces cerevisiae (strain ATCC 2... | 3411     | 14.2126   |

| Prot. Rank | Protein Name                                                                                            | [Log Prob] | Best [Log Prob] | Best Score | # Spectra | # Uniq. Peps. | # Mod Peps. | % Cov. | # AAs | Intensity |
|------------|---------------------------------------------------------------------------------------------------------|------------|-----------------|------------|-----------|---------------|-------------|--------|-------|-----------|
| 1   1      | >sp P43575 PAU5_YEAST Seripauperin-5 OS=Saccharomyces cerevisiae (strain ATCC 204508 / S288c) OX=559... | 327.47     | 16.74           | 1004.1     | 632       | 70            | 67          | 68.9   | 122   | 3.742e+7  |
| 2   2      | >sp P32612 PAU2_YEAST Seripauperin-2 OS=Saccharomyces cerevisiae (strain ATCC 204508 / S288c) OX=559... | 178.33     | 13.24           | 726.5      | 270       | 60            | 58          | 58.3   | 120   | 7.688e+6  |

Spectrum (double click to dock / undock)

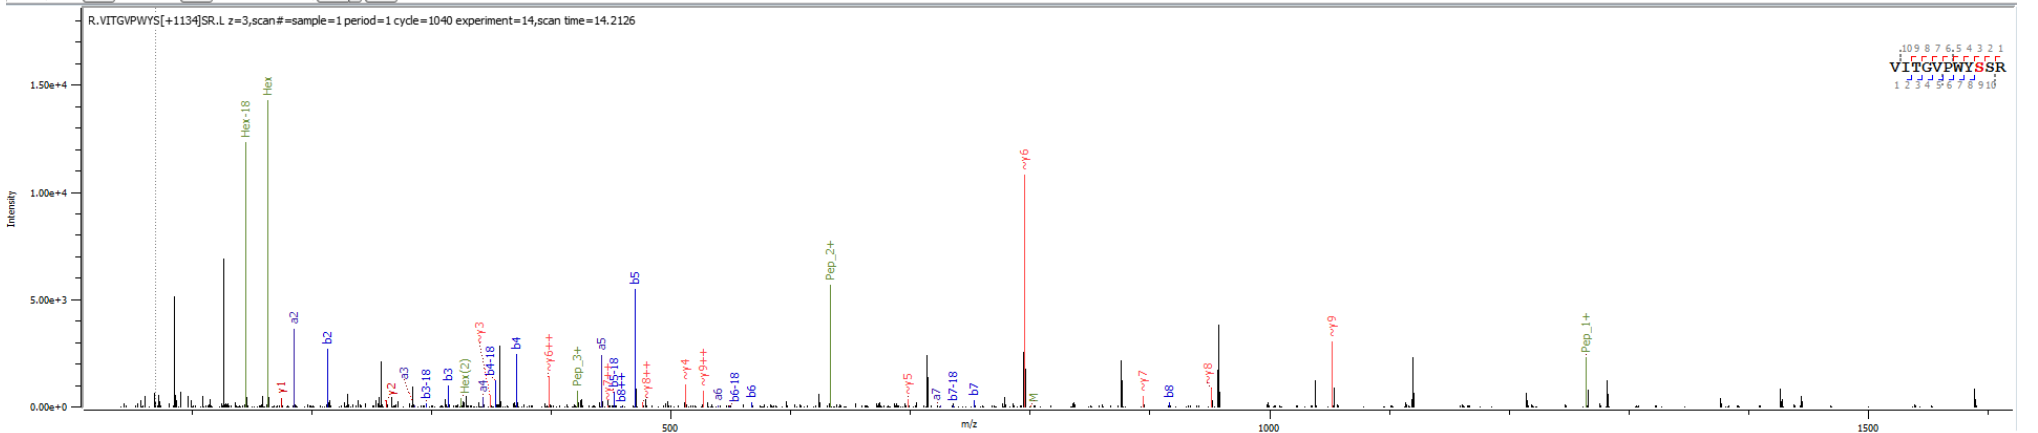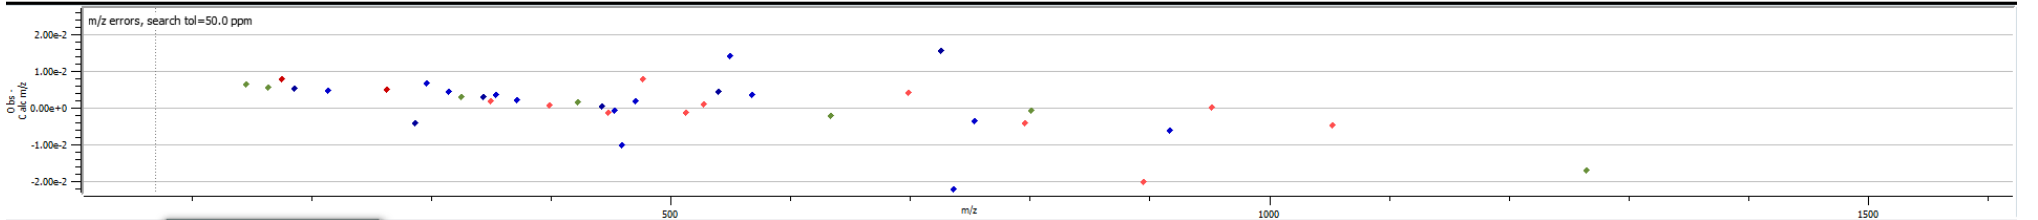

Sample S1 R.VITGVPWYS[+1134.370]SR.L

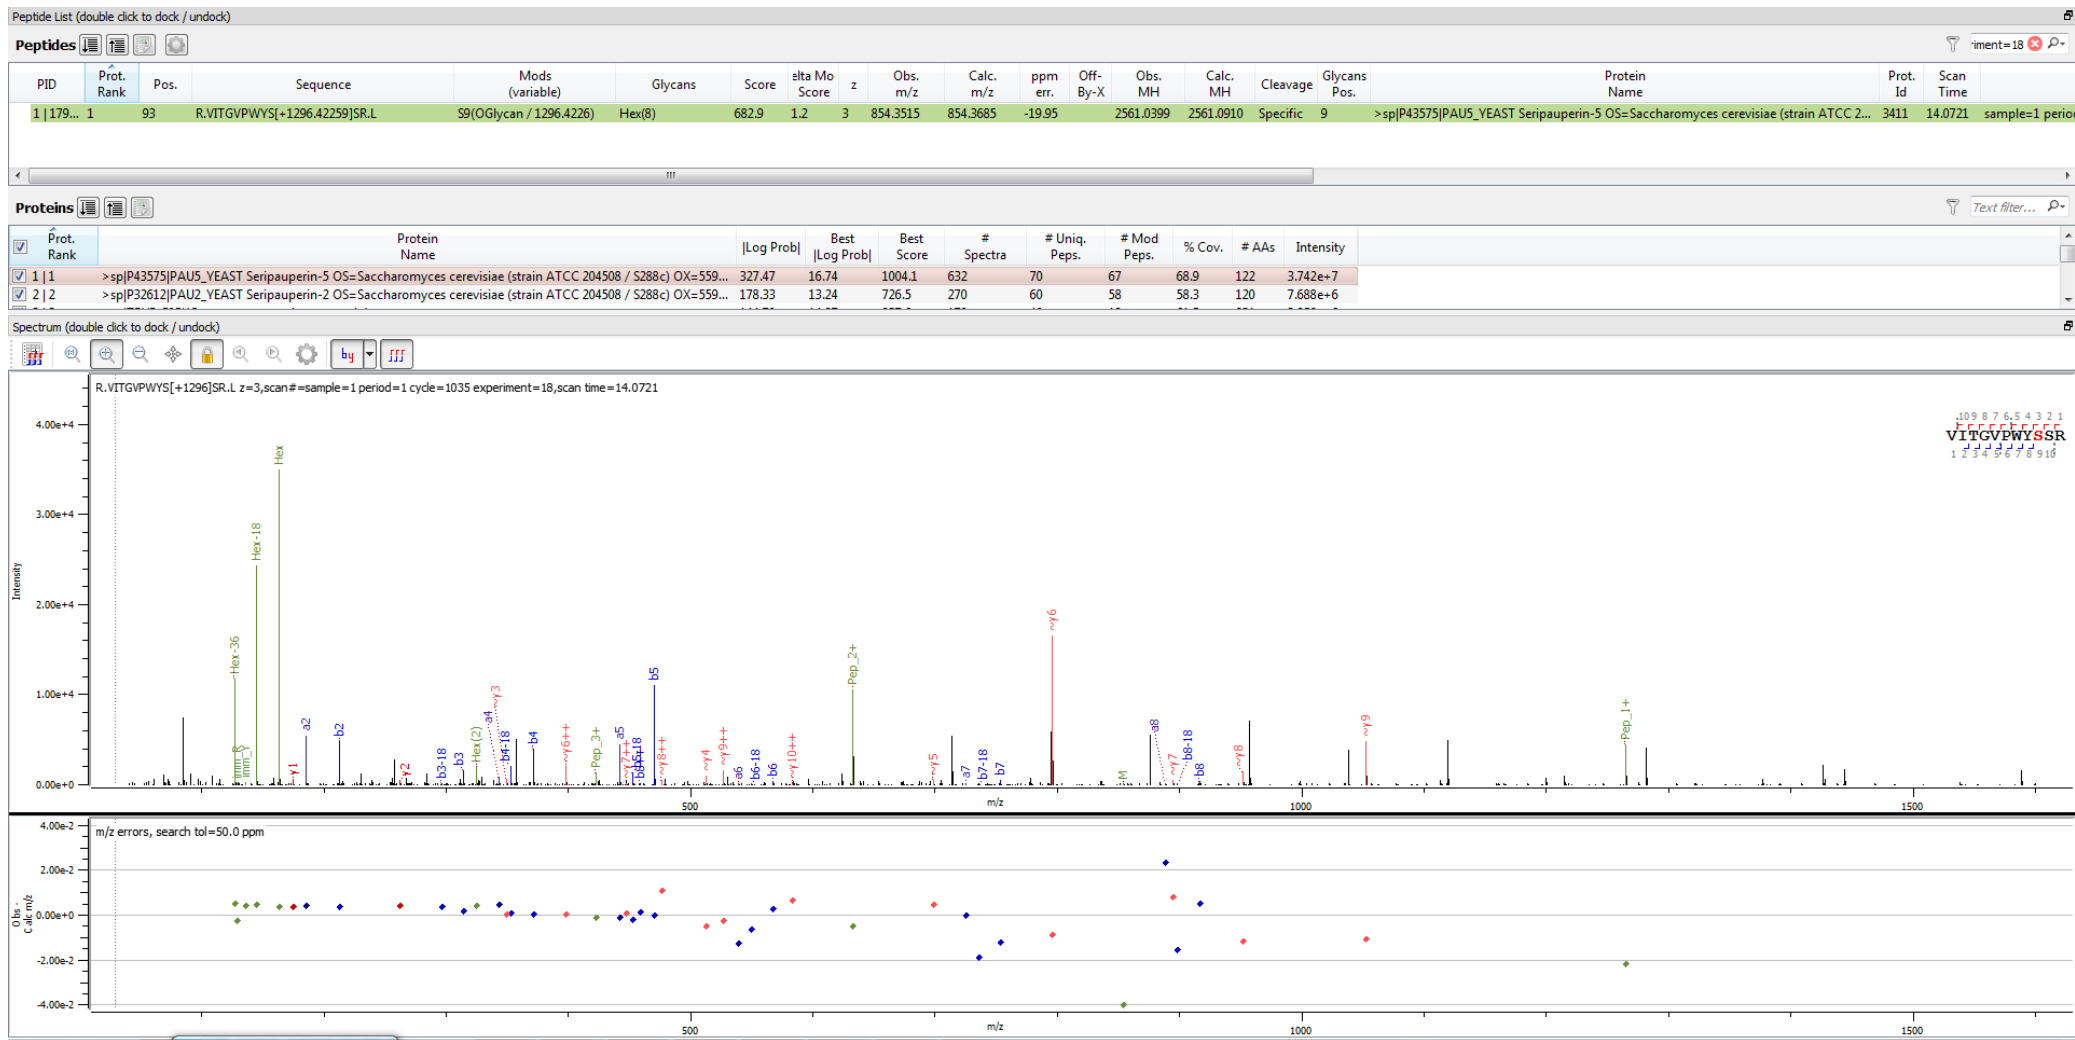

Sample S1 R.VITGVPWYS[+1296.423]SR.L



Peptides Experiment=12

| PID      | Prot. Rank | Pos. | Sequence                     | Mods (variable)         | Glycans | Score | alta Mo Score | z | Obs. m/z | Calc. m/z | ppm err. | Off-By-X | Obs. MH   | Calc. MH  | Cleavage | Glycans Pos. | Protein Name                                                                       | Prot. Id | Scan Time |
|----------|------------|------|------------------------------|-------------------------|---------|-------|---------------|---|----------|-----------|----------|----------|-----------|-----------|----------|--------------|------------------------------------------------------------------------------------|----------|-----------|
| 1 178... | 1          | 93   | R.VITGVPWYS[+1458.47541]SR.L | S9(OGlycan / 1458.4754) | Hex(9)  | 613.5 | 1.2           | 3 | 908.3717 | 908.3861  | -15.89   |          | 2723.1006 | 2723.1438 | Specific | 9            | >sp P43575 PAU5_YEAST Seripauperin-5 OS=Saccharomyces cerevisiae (strain ATCC 2... | 3411     | 13.9516   |

Proteins Text filter...

| Prot. Rank | Protein Name                                                                                            | [Log Prob] | Best [Log Prob] | Best Score | # Spectra | # Uniq. Peps. | # Mod Peps. | % Cov. | # AAs | Intensity |
|------------|---------------------------------------------------------------------------------------------------------|------------|-----------------|------------|-----------|---------------|-------------|--------|-------|-----------|
| 1 1        | >sp P43575 PAU5_YEAST Seripauperin-5 OS=Saccharomyces cerevisiae (strain ATCC 204508 / S288c) OX=559... | 327.47     | 16.74           | 1004.1     | 632       | 70            | 67          | 68.9   | 122   | 3.742e+7  |
| 2 2        | >sp P32612 PAU2_YEAST Seripauperin-2 OS=Saccharomyces cerevisiae (strain ATCC 204508 / S288c) OX=559... | 178.33     | 13.24           | 726.5      | 270       | 60            | 58          | 58.3   | 120   | 7.688e+6  |

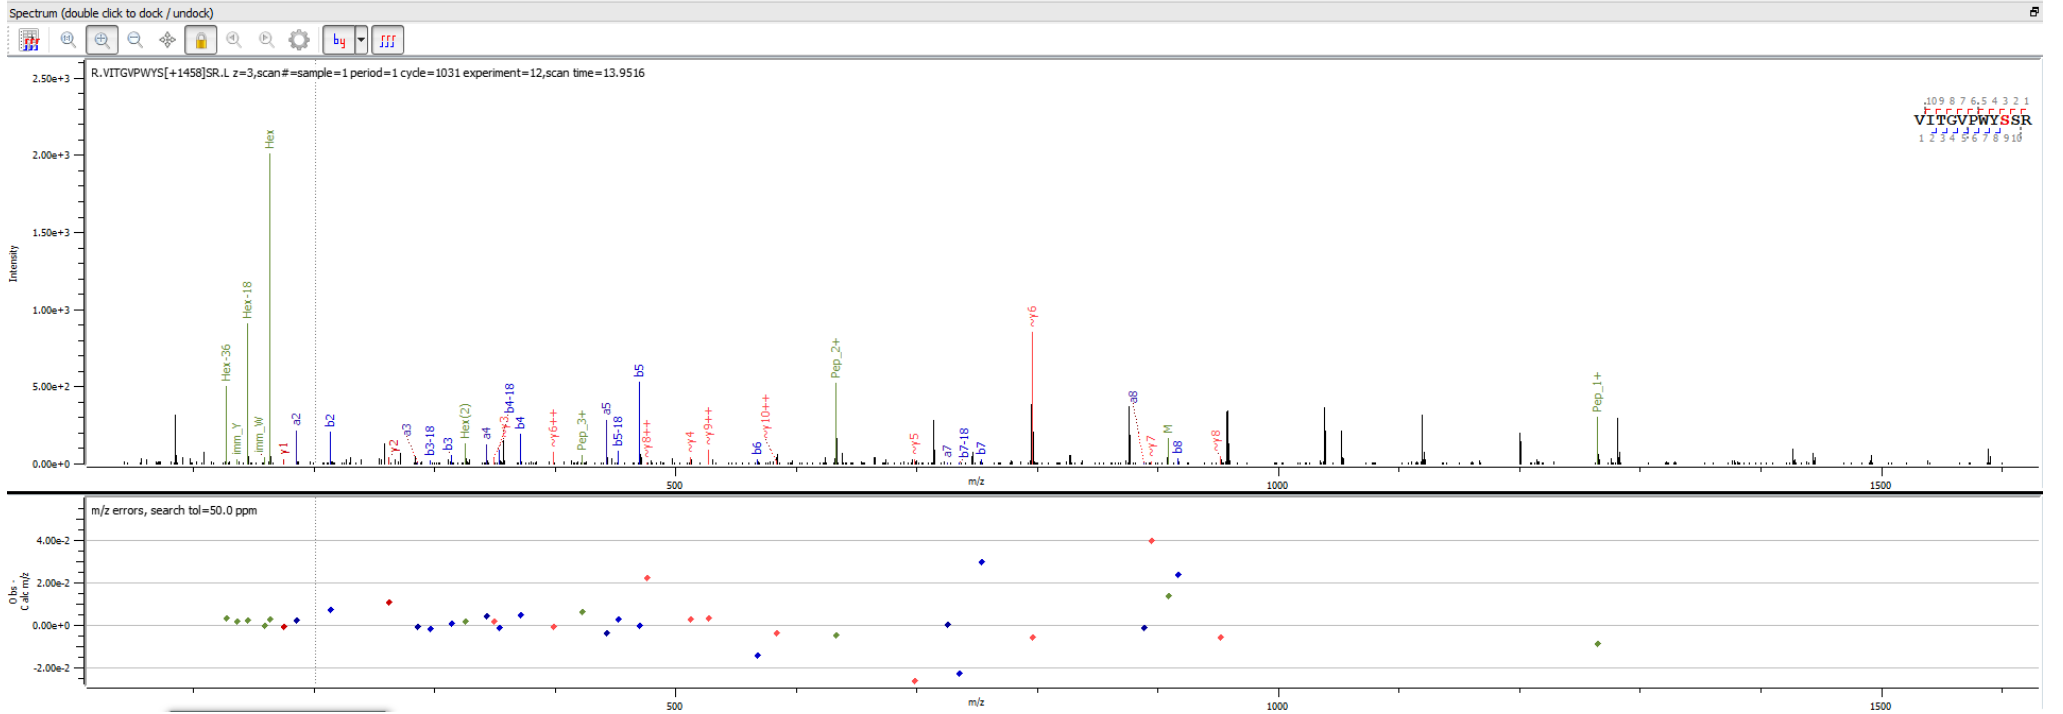

Sample S1 R.VITGVPWYS[+1458.475]SR.L

Peptide List (double click to dock / undock)

Peptides limit=15

| PID        | Prot. Rank | Pos. | Sequence                     | Mods (variable)         | Glycans | Score | delta Mo Score | z | Obs. m/z  | Calc. m/z | ppm err. | Off-By-X | Obs. MH   | Calc. MH  | Cleavage   | Glycans Pos. | Protein Name                                                                       | Prot. Id | Scan Time               |
|------------|------------|------|------------------------------|-------------------------|---------|-------|----------------|---|-----------|-----------|----------|----------|-----------|-----------|------------|--------------|------------------------------------------------------------------------------------|----------|-------------------------|
| 1   157... | 3          | 93   | R.VITGVPWYSS[+972.31694]RL.K | S10(OGlycan / 972.3169) | Hex(6)  | 413.9 | 1.7            | 2 | 1175.5192 | 1175.5384 | -16.33   |          | 2350.0310 | 2350.0694 | CRagged 10 |              | >sp P43575 PAU5_YEAST Seripauperin-5 OS=Saccharomyces cerevisiae (strain ATCC 2... | 3411     | 15.6784 sample=1 period |

Proteins Text filter...

| Prot. Rank | Protein Name                                                                                            | [Log Prob] | Best [Log Prob] | Best Score | # Spectra | # Uniq. Peps. | # Mod Peps. | % Cov. | # AAs | Intensity |
|------------|---------------------------------------------------------------------------------------------------------|------------|-----------------|------------|-----------|---------------|-------------|--------|-------|-----------|
| 3   3      | >sp P43575 PAU5_YEAST Seripauperin-5 OS=Saccharomyces cerevisiae (strain ATCC 204508 / S288c) OX=559... | 117.08     | 14.43           | 972.1      | 214       | 40            | 39          | 34.4   | 122   | 3.360e+6  |
| 4   4      | >sp K1C9_HUMAN (Common contaminant protein)                                                             | 66.04      | 18.99           | 1150.7     | 49        | 14            | 3           | 24.9   | 623   | 1.617e+5  |
| 5   5      | >sp POC885 PAU19_YEAST Seripauperin-19 OS=Saccharomyces cerevisiae (strain ATCC 204508 / S288c) OX=5... | 44.94      | 6.66            | 595.2      | 47        | 17            | 17          | 9.7    | 124   | 3.884e+5  |

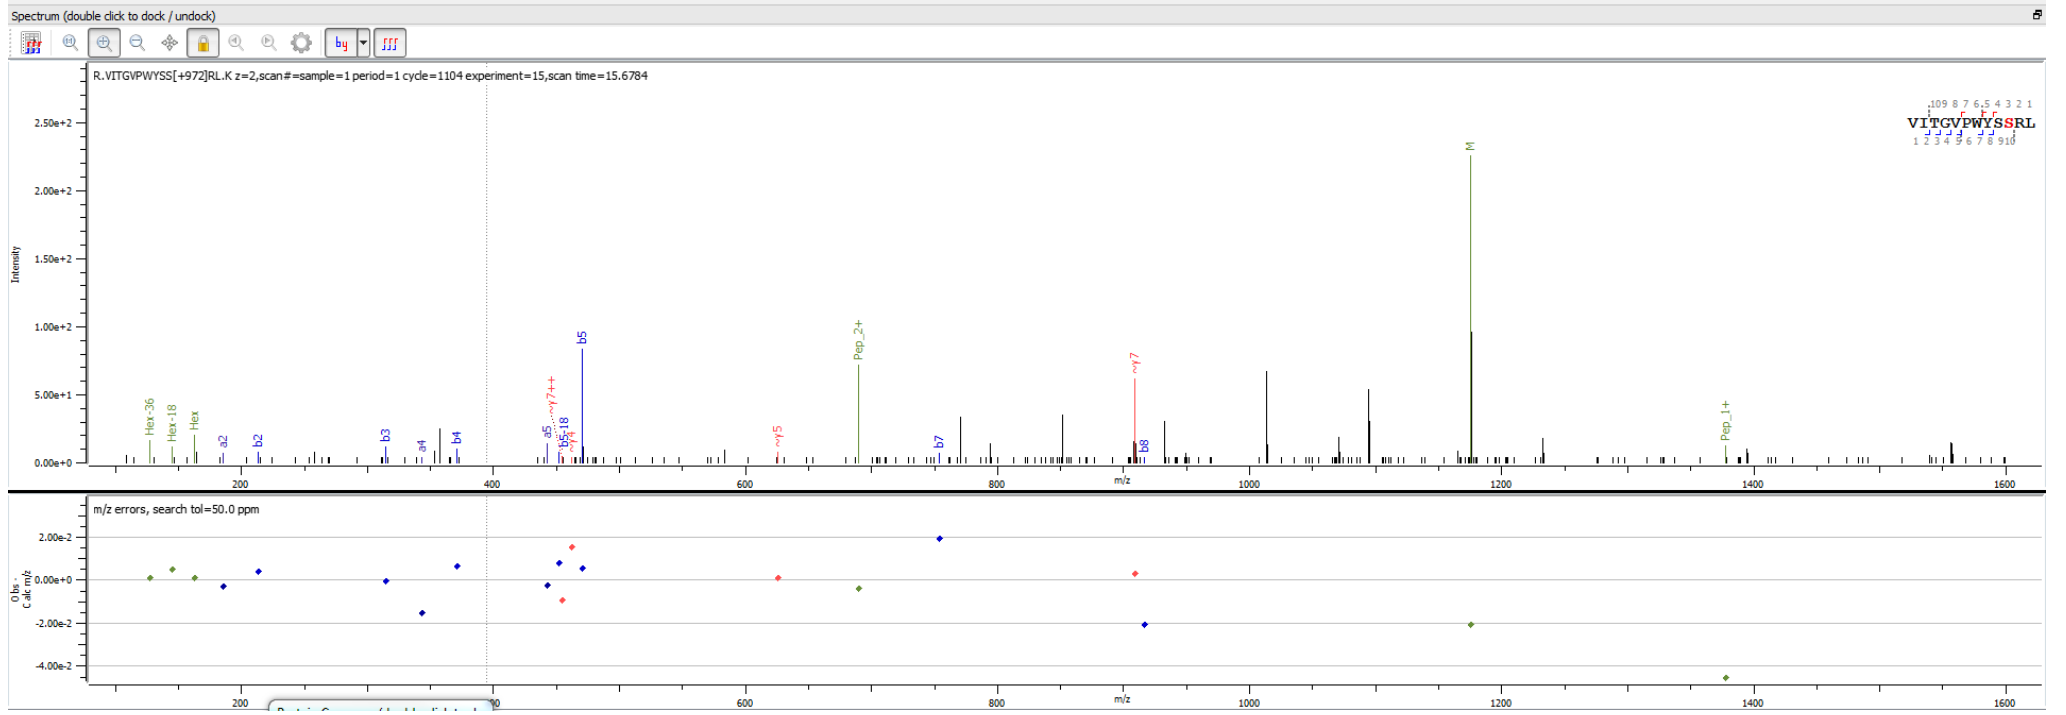

Sample S2 R.VITGVPWYSS[+972.317]RL.K

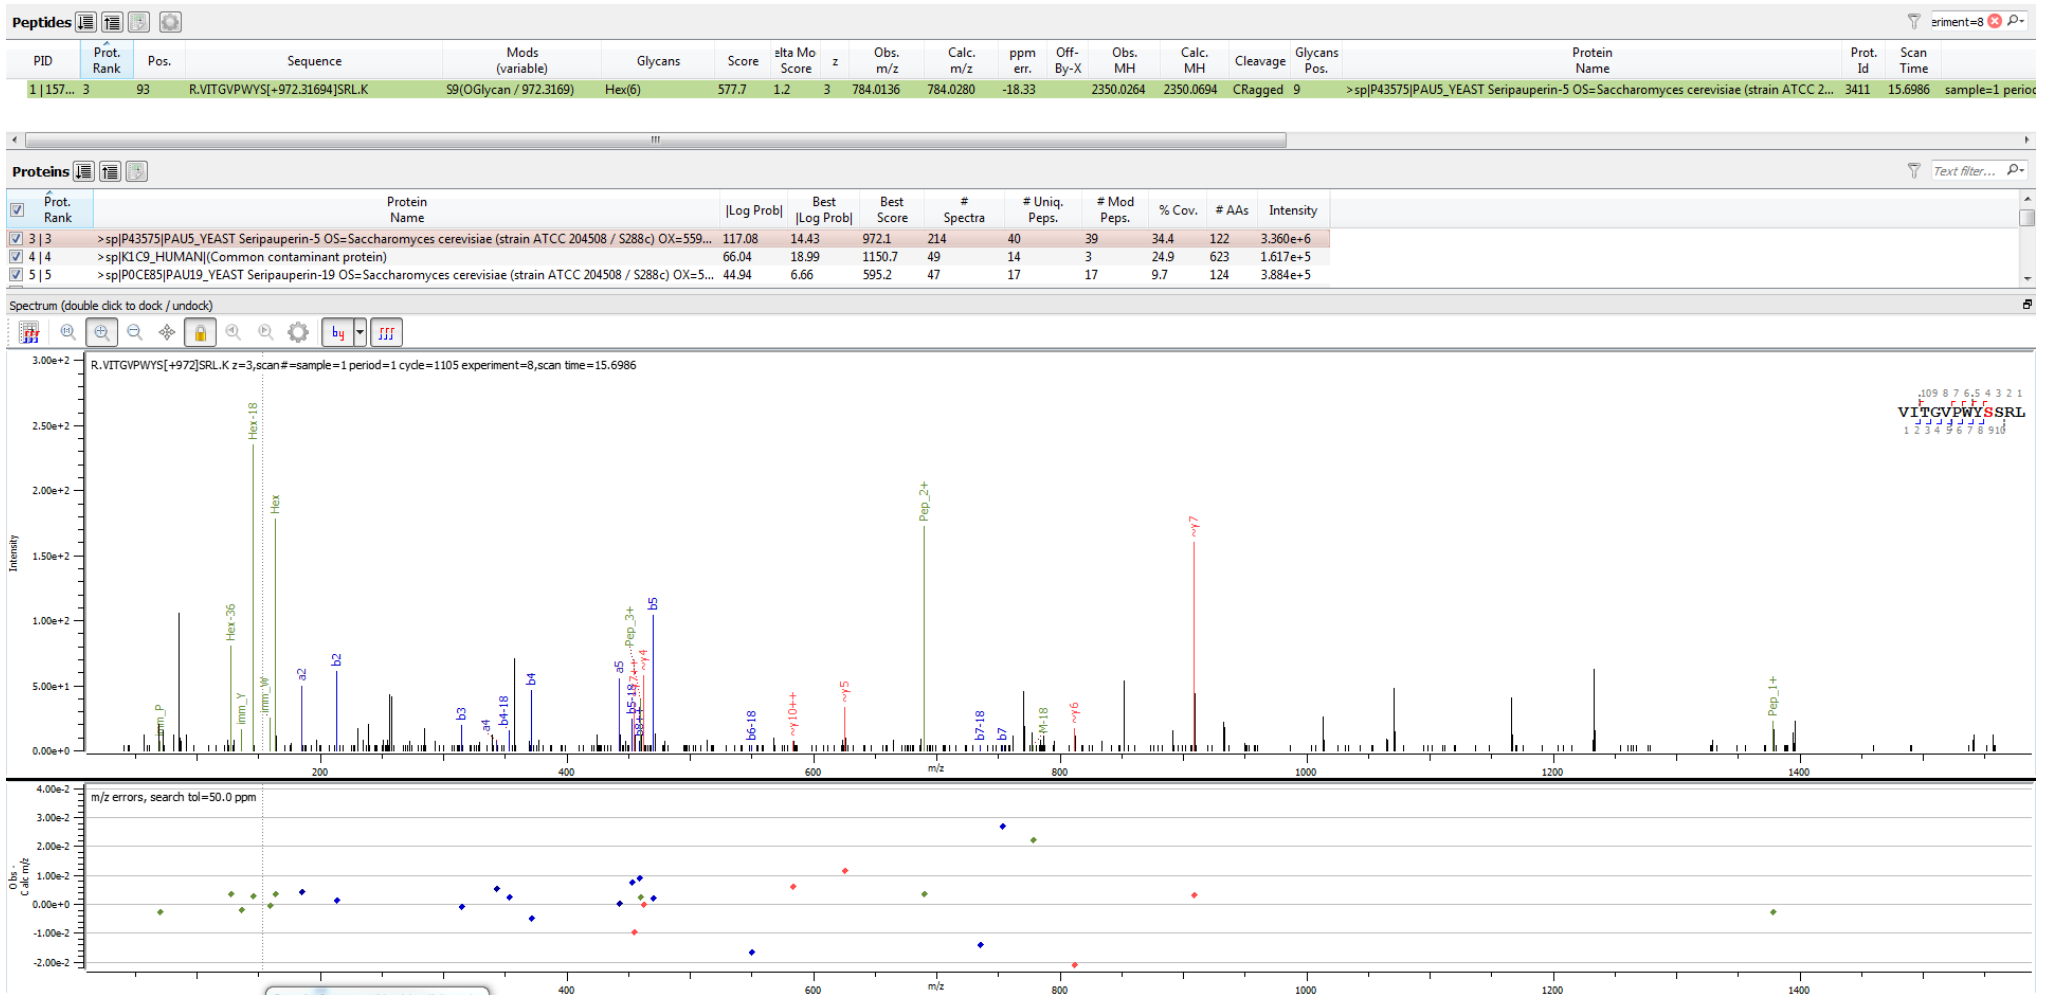

Sample S2 R.VITGVPWYS[+972.317]SRL.K



| PID | Prot. Rank | Pos. | Sequence | Mods (variable)               | Glycans                 | Score  | delta Mo Score | z   | Obs. m/z | Calc. m/z | ppm err. | Off-By-X | Obs. MH   | Calc. MH  | Cleavage | Glycans Pos. | Protein Name                                                                       | Prot. Id | Scan Time |                 |
|-----|------------|------|----------|-------------------------------|-------------------------|--------|----------------|-----|----------|-----------|----------|----------|-----------|-----------|----------|--------------|------------------------------------------------------------------------------------|----------|-----------|-----------------|
| 1   | 169...     | 3    | 93       | R.VITGVPWYS[+1296.42259]SRL.K | S9(OGlycan / 1296.4226) | Hex(8) | 567.8          | 1.2 | 3        | 892.0472  | 892.0632 | -18.01   | 2674.1269 | 2674.1751 | CRagged  | 9            | >sp P43575 PAUS_YEAST Seripauperin-5 OS=Saccharomyces cerevisiae (strain ATCC 2... | 3411     | 15.4305   | sample=1 period |

| Prot. Rank | Protein Name                                                                                            | [Log Prob] | Best [Log Prob] | Best Score | # Spectra | # Uni. Peps. | # Mod Peps. | % Cov. | # AAs | Intensity |
|------------|---------------------------------------------------------------------------------------------------------|------------|-----------------|------------|-----------|--------------|-------------|--------|-------|-----------|
| 3   3      | >sp P43575 PAUS_YEAST Seripauperin-5 OS=Saccharomyces cerevisiae (strain ATCC 204508 / S288c) OX=559... | 117.08     | 14.43           | 972.1      | 214       | 40           | 39          | 34.4   | 122   | 3.360e+6  |

Spectrum (double click to dock / undock)

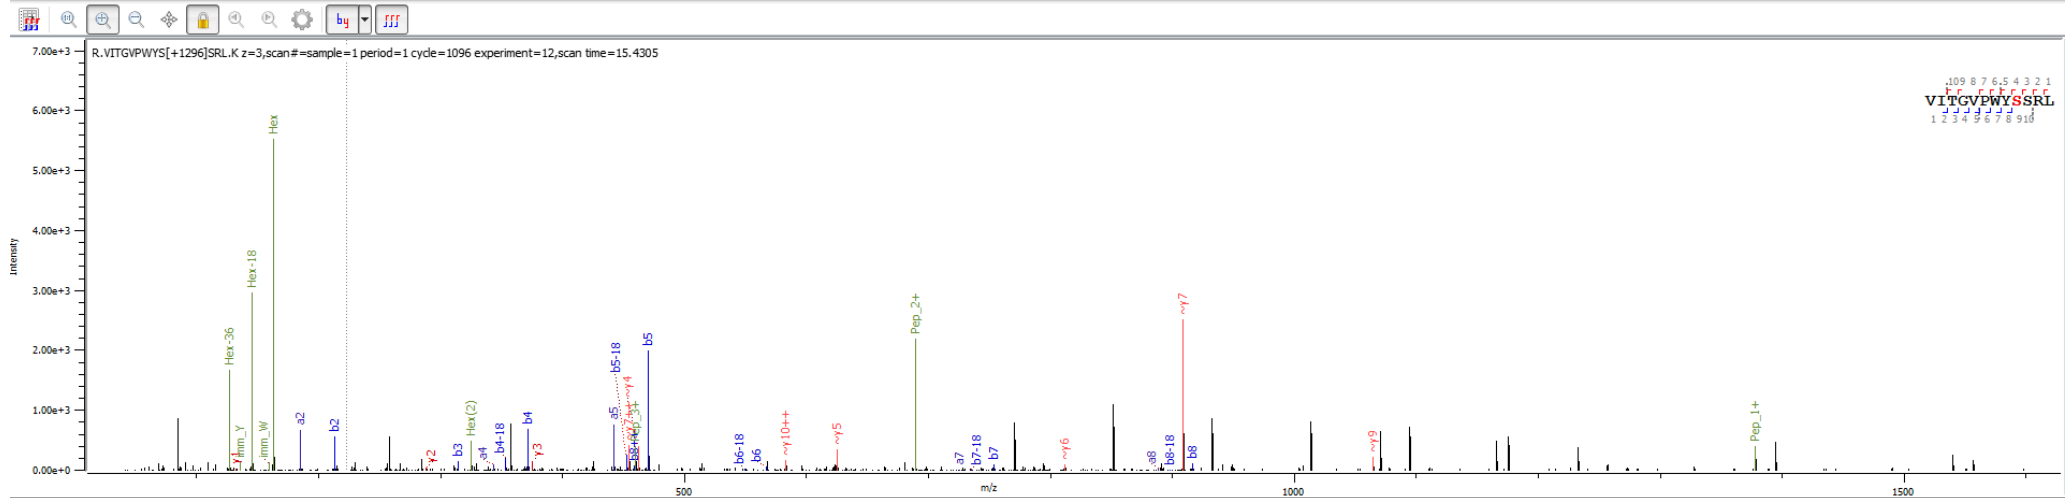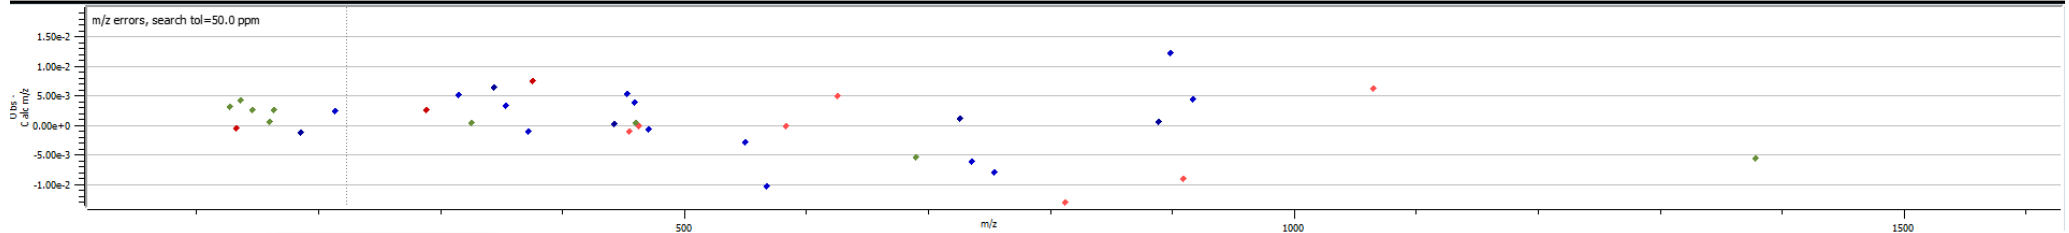

Sample S2 R.VITGVPWYS[+1296.423]SRL.K

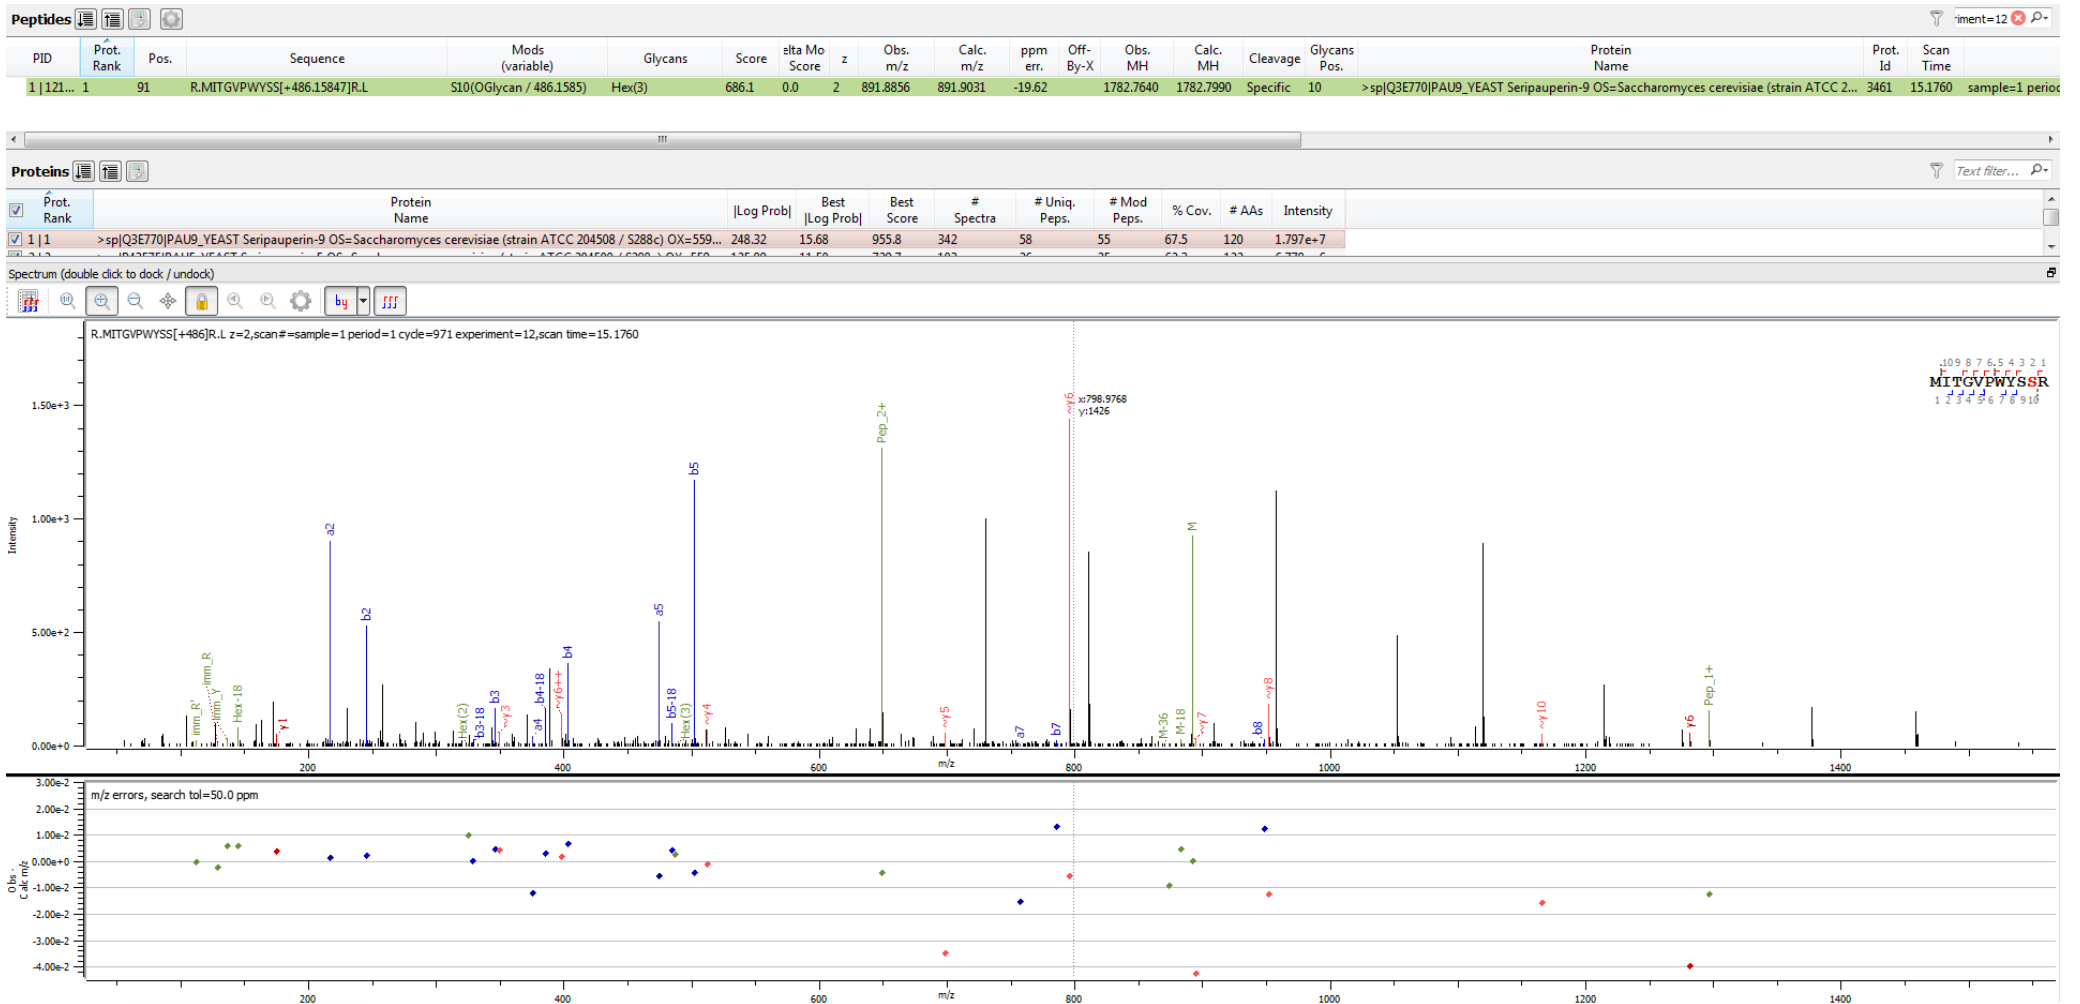

Sample S3 R.MITGVPWYSS[+486.158]R.L

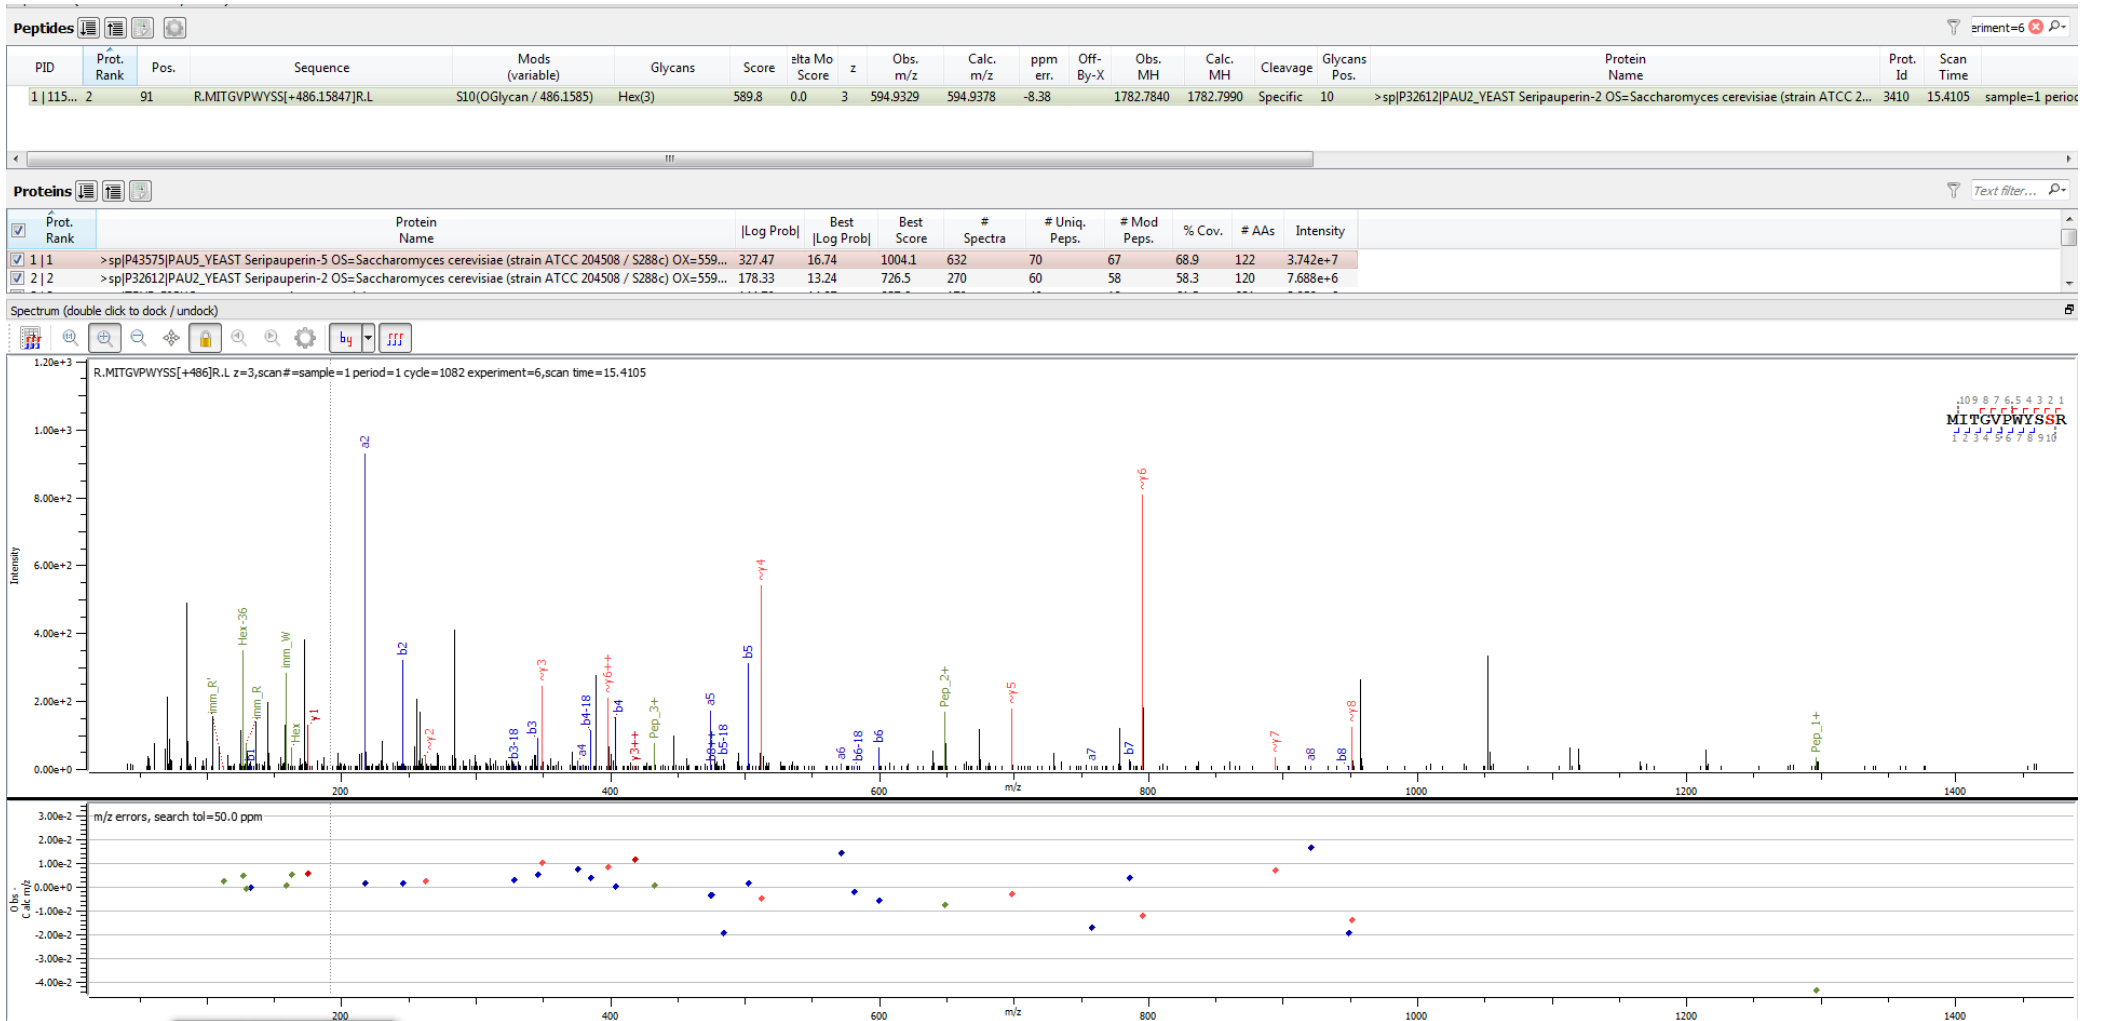

Sample S1 R.MITGVPWYSS[+486.158]R.L

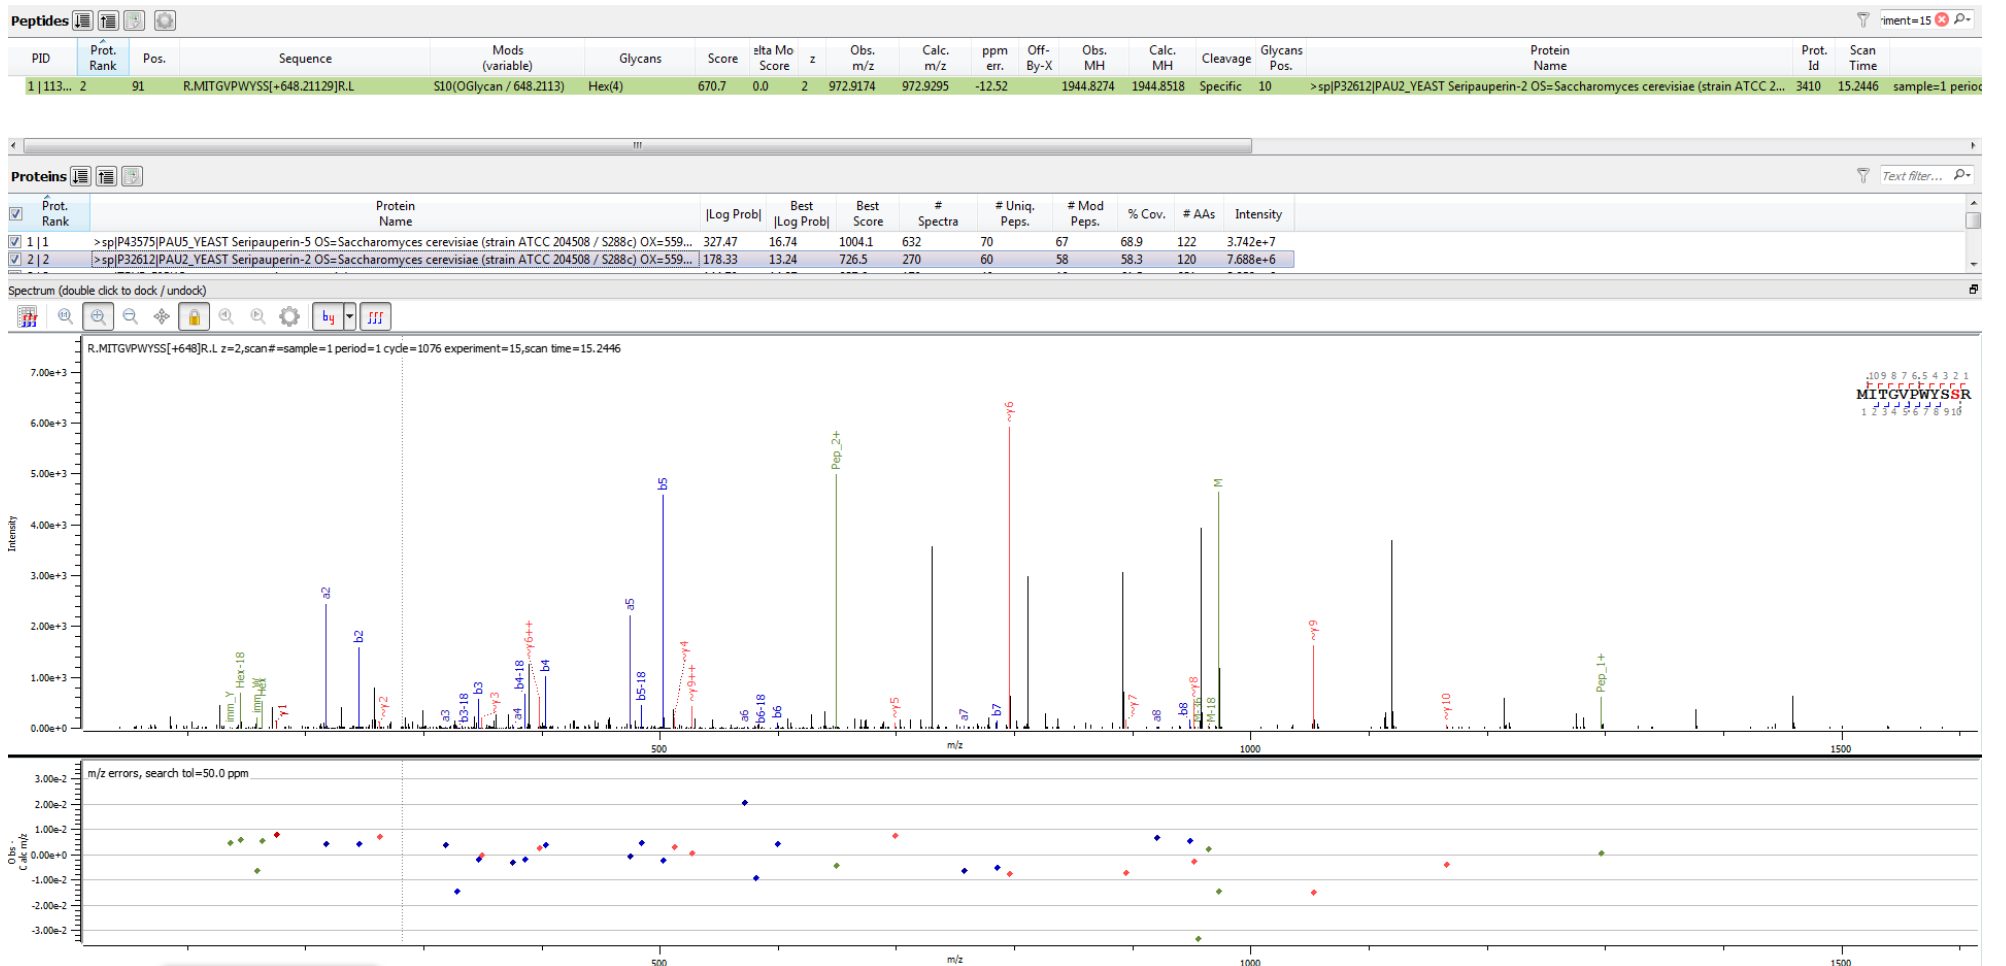

Sample S1 R.MITGVPWYSS[+648.211]R.L





| PID        | Prot. Rank | Pos. | Sequence                  | Mods (variable)        | Glycans | Score | delta Mo Score | z | Obs. m/z  | Calc. m/z | ppm err. | Off-By-X | Obs. MH   | Calc. MH  | Cleavage | Glycans Pos. | Protein Name                                                                       | Prot. Id | Scan Time |
|------------|------------|------|---------------------------|------------------------|---------|-------|----------------|---|-----------|-----------|----------|----------|-----------|-----------|----------|--------------|------------------------------------------------------------------------------------|----------|-----------|
| 1   187... | 2          | 91   | R.MITGVPWYS[+810.264]SR.L | S9(OGlycan / 810.2641) | Hex(5)  | 658.5 | 1.2            | 2 | 1053.9396 | 1053.9559 | -15.52   |          | 2106.8719 | 2106.9046 | Specific | 9            | >sp P32612 PAU2_YEAST Seripauperin-2 OS=Saccharomyces cerevisiae (strain ATCC 2... | 3410     | 15.0441   |

| Prot. Rank | Protein Name                                                                                            | [Log Prob] | Best [Log Prob] | Best Score | # Spectra | # Uniq. Peps. | # Mod. Peps. | % Cov. | # AAs | Intensity |
|------------|---------------------------------------------------------------------------------------------------------|------------|-----------------|------------|-----------|---------------|--------------|--------|-------|-----------|
| 1   1      | >sp P43575 PAU2_YEAST Seripauperin-5 OS=Saccharomyces cerevisiae (strain ATCC 204508 / S288c) OX=559... | 327.47     | 16.74           | 1004.1     | 632       | 70            | 67           | 68.9   | 122   | 3.742e+7  |
| 2   2      | >sp P32612 PAU2_YEAST Seripauperin-2 OS=Saccharomyces cerevisiae (strain ATCC 204508 / S288c) OX=559... | 178.33     | 13.24           | 726.5      | 270       | 60            | 58           | 58.3   | 120   | 7.688e+6  |

Spectrum (double click to dock / undock)

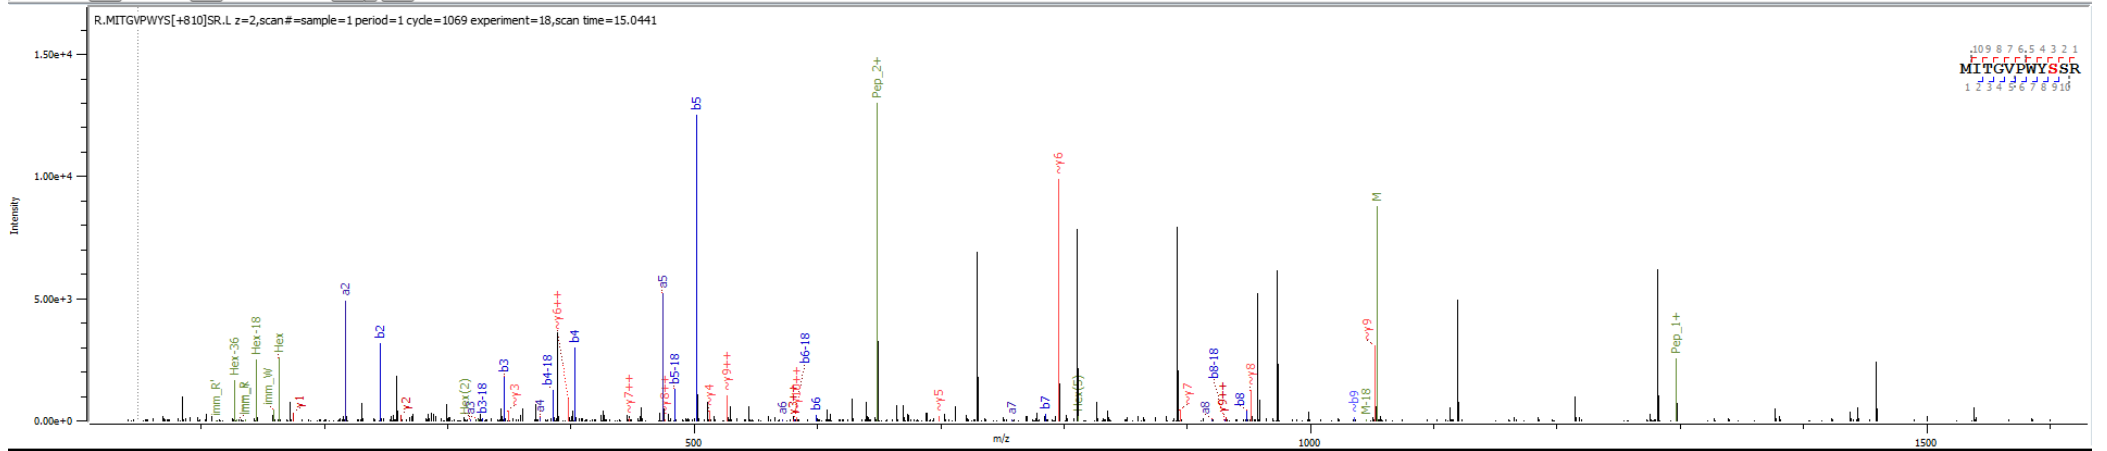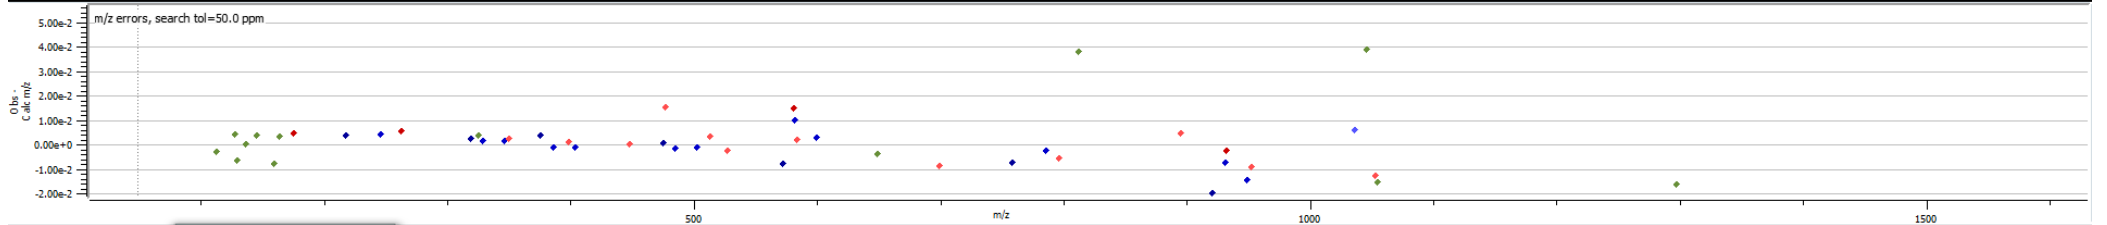

Sample S1 R.MITGVPWYS[+810.264]SR.L

| PID      | Prot. Rank | Pos. | Sequence                   | Mods (variable)        | Glycans | Score | delta Mo Score | z | Obs. m/z | Calc. m/z | ppm err. | Off-By-X | Obs. MH   | Calc. MH  | Cleavage | Glycans Pos. | Protein Name                                                                       | Prot. Id | Scan Time |
|----------|------------|------|----------------------------|------------------------|---------|-------|----------------|---|----------|-----------|----------|----------|-----------|-----------|----------|--------------|------------------------------------------------------------------------------------|----------|-----------|
| 1 187... | 2          | 91   | R.MITGVPWYS[+810.2641]SR.L | S9(OGlycan / 810.2641) | Hex(5)  | 726.5 | 1.2            | 3 | 702.9597 | 702.9731  | -19.03   |          | 2106.8645 | 2106.9046 | Specific | 9            | >sp P32612 PAU2_YEAST Seripauperin-2 OS=Saccharomyces cerevisiae (strain ATCC 2... | 3410     | 15.0671   |

| Prot. Rank | Protein Name                                                                                            | [Log Prob] | Best [Log Prob] | Best Score | # Spectra | # Uniq. Peps. | # Mod Peps. | % Cov. | # AAs | Intensity |
|------------|---------------------------------------------------------------------------------------------------------|------------|-----------------|------------|-----------|---------------|-------------|--------|-------|-----------|
| 1 1        | >sp P43575 PAU5_YEAST Seripauperin-5 OS=Saccharomyces cerevisiae (strain ATCC 204508 / S288c) OX=559... | 327.47     | 16.74           | 1004.1     | 632       | 70            | 67          | 68.9   | 122   | 3.742e+7  |
| 2 2        | >sp P32612 PAU2_YEAST Seripauperin-2 OS=Saccharomyces cerevisiae (strain ATCC 204508 / S288c) OX=559... | 178.33     | 13.24           | 726.5      | 270       | 60            | 58          | 58.3   | 120   | 7.688e+6  |

Spectrum (double click to dock / undock)

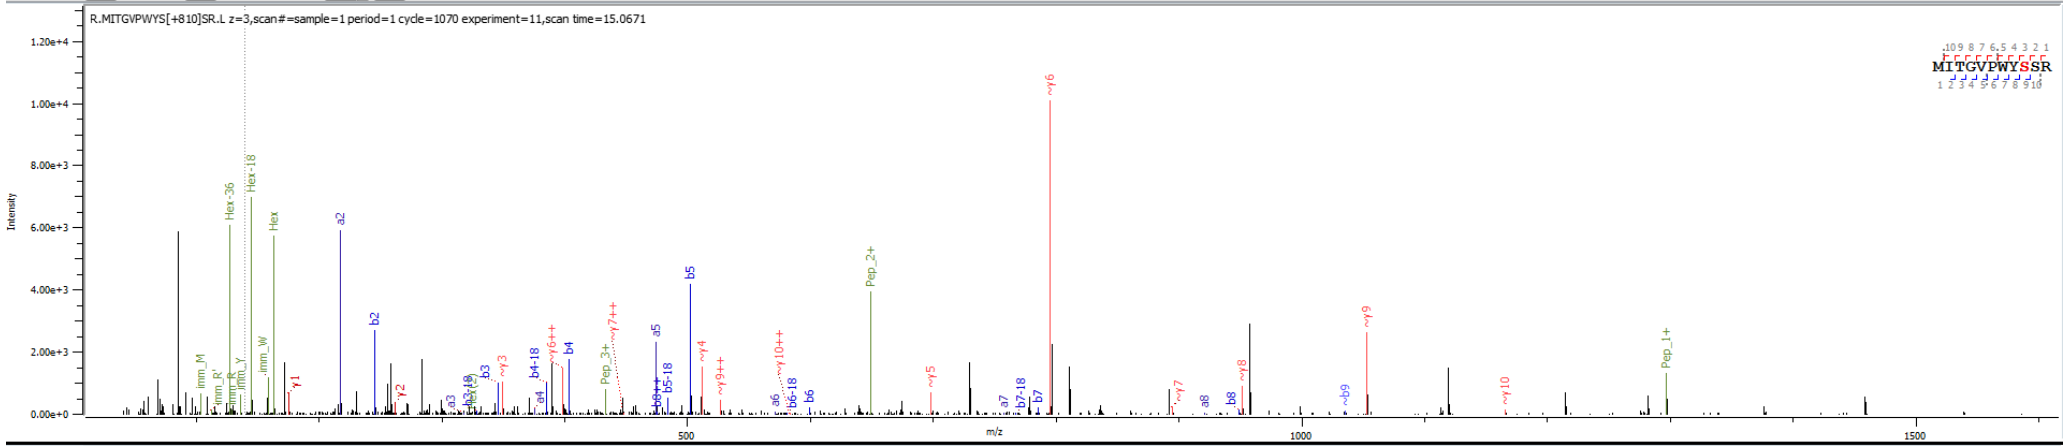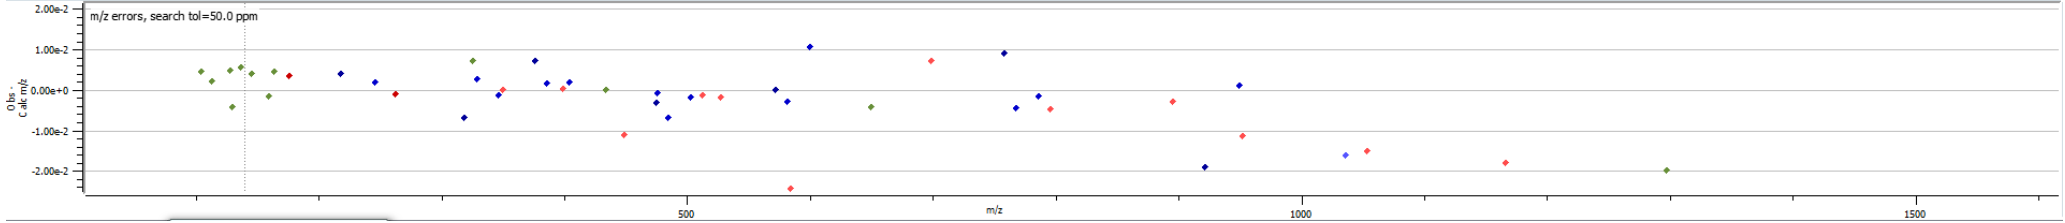

Sample S1 R.MITGVPWYS[+810.264]SR.L

| PID | Prot. Rank | Pos. | Sequence | Mods (variable)             | Glycans                 | Score  | alta Mo Score | z   | Obs. m/z | Calc. m/z | ppm err.  | Off-By-X | Obs. MH   | Calc. MH  | Cleavage | Glycans Pos. | Protein Name                                                                       | Prot. Id | Scan Time |
|-----|------------|------|----------|-----------------------------|-------------------------|--------|---------------|-----|----------|-----------|-----------|----------|-----------|-----------|----------|--------------|------------------------------------------------------------------------------------|----------|-----------|
| 1   | 186...     | 2    | 91       | R.MITGVPWYSS[+972.31694]R.L | S10(Oglycan / 972.3169) | Hex(6) | 622.3         | 0.8 | 2        | 1134.9622 | 1134.9824 | -17.74   | 2268.9172 | 2268.9574 | Specific | 10           | >sp P32612 PAU2_YEAST Seripauperin-2 OS=Saccharomyces cerevisiae (strain ATCC 2... | 3410     | 14.8720   |

| Prot. Rank | Protein Name | [Log Prob]                                                                                              | Best [Log Prob] | Best Score | # Spectra | # Uniq. Peps. | # Mod Peps. | % Cov. | # AAs | Intensity |          |
|------------|--------------|---------------------------------------------------------------------------------------------------------|-----------------|------------|-----------|---------------|-------------|--------|-------|-----------|----------|
| 1          | 1            | >sp P43575 PAU5_YEAST Seripauperin-5 OS=Saccharomyces cerevisiae (strain ATCC 204508 / S288c) OX=559... | 327.47          | 16.74      | 1004.1    | 632           | 70          | 67     | 68.9  | 122       | 3.742e+7 |
| 2          | 2            | >sp P32612 PAU2_YEAST Seripauperin-2 OS=Saccharomyces cerevisiae (strain ATCC 204508 / S288c) OX=559... | 178.33          | 13.24      | 726.5     | 270           | 60          | 58     | 58.3  | 120       | 7.688e+6 |

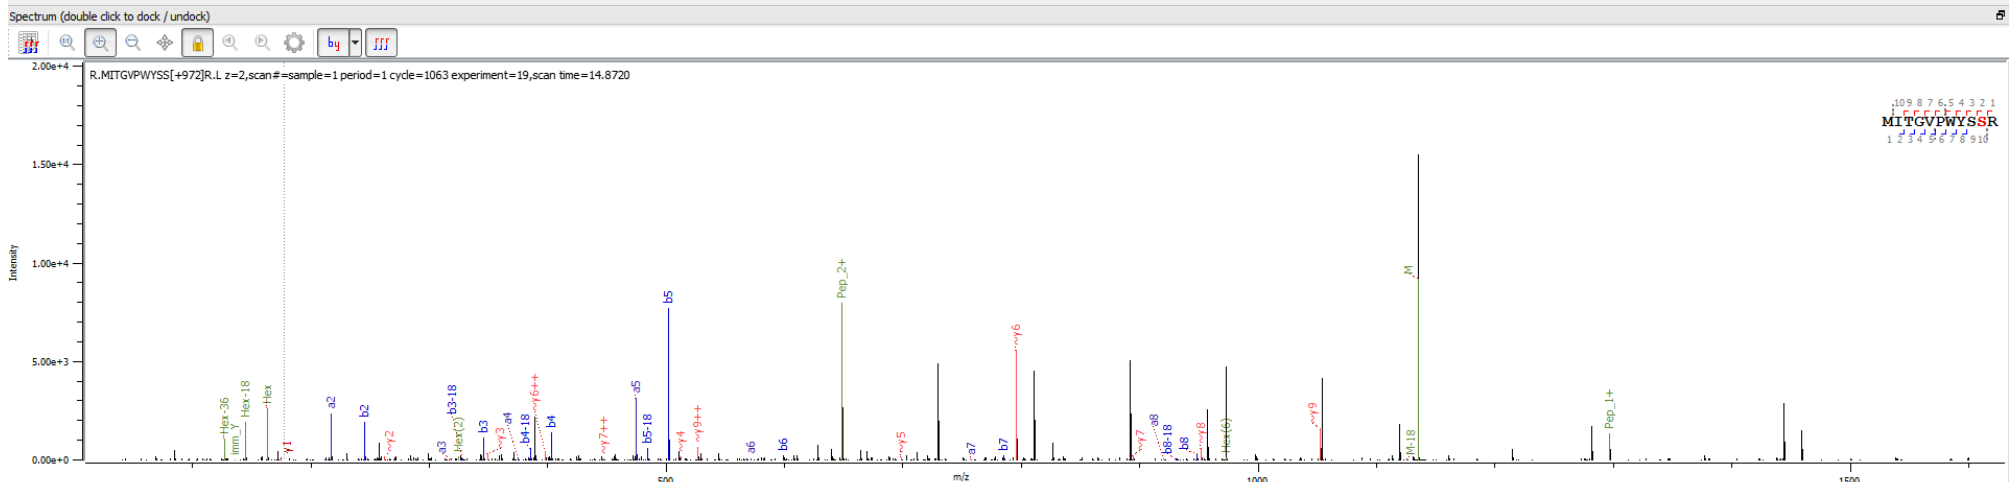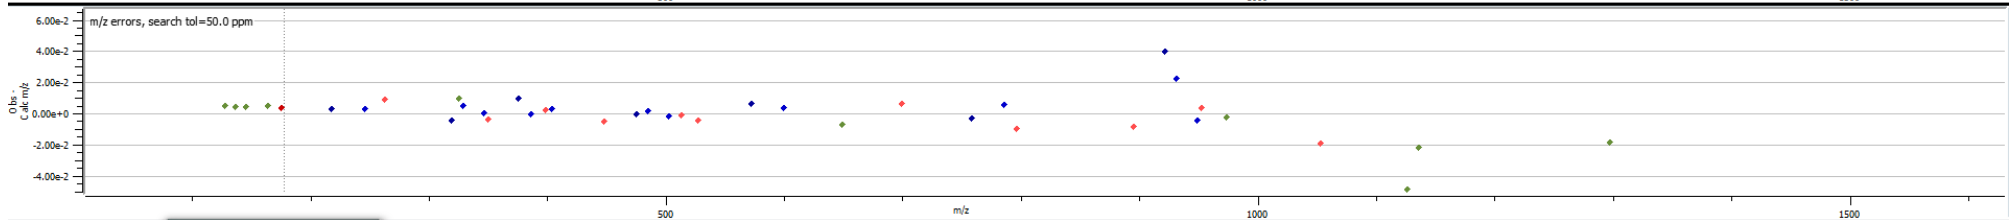

Sample S1 R.MITGVPWYS[+972.317]SR.L

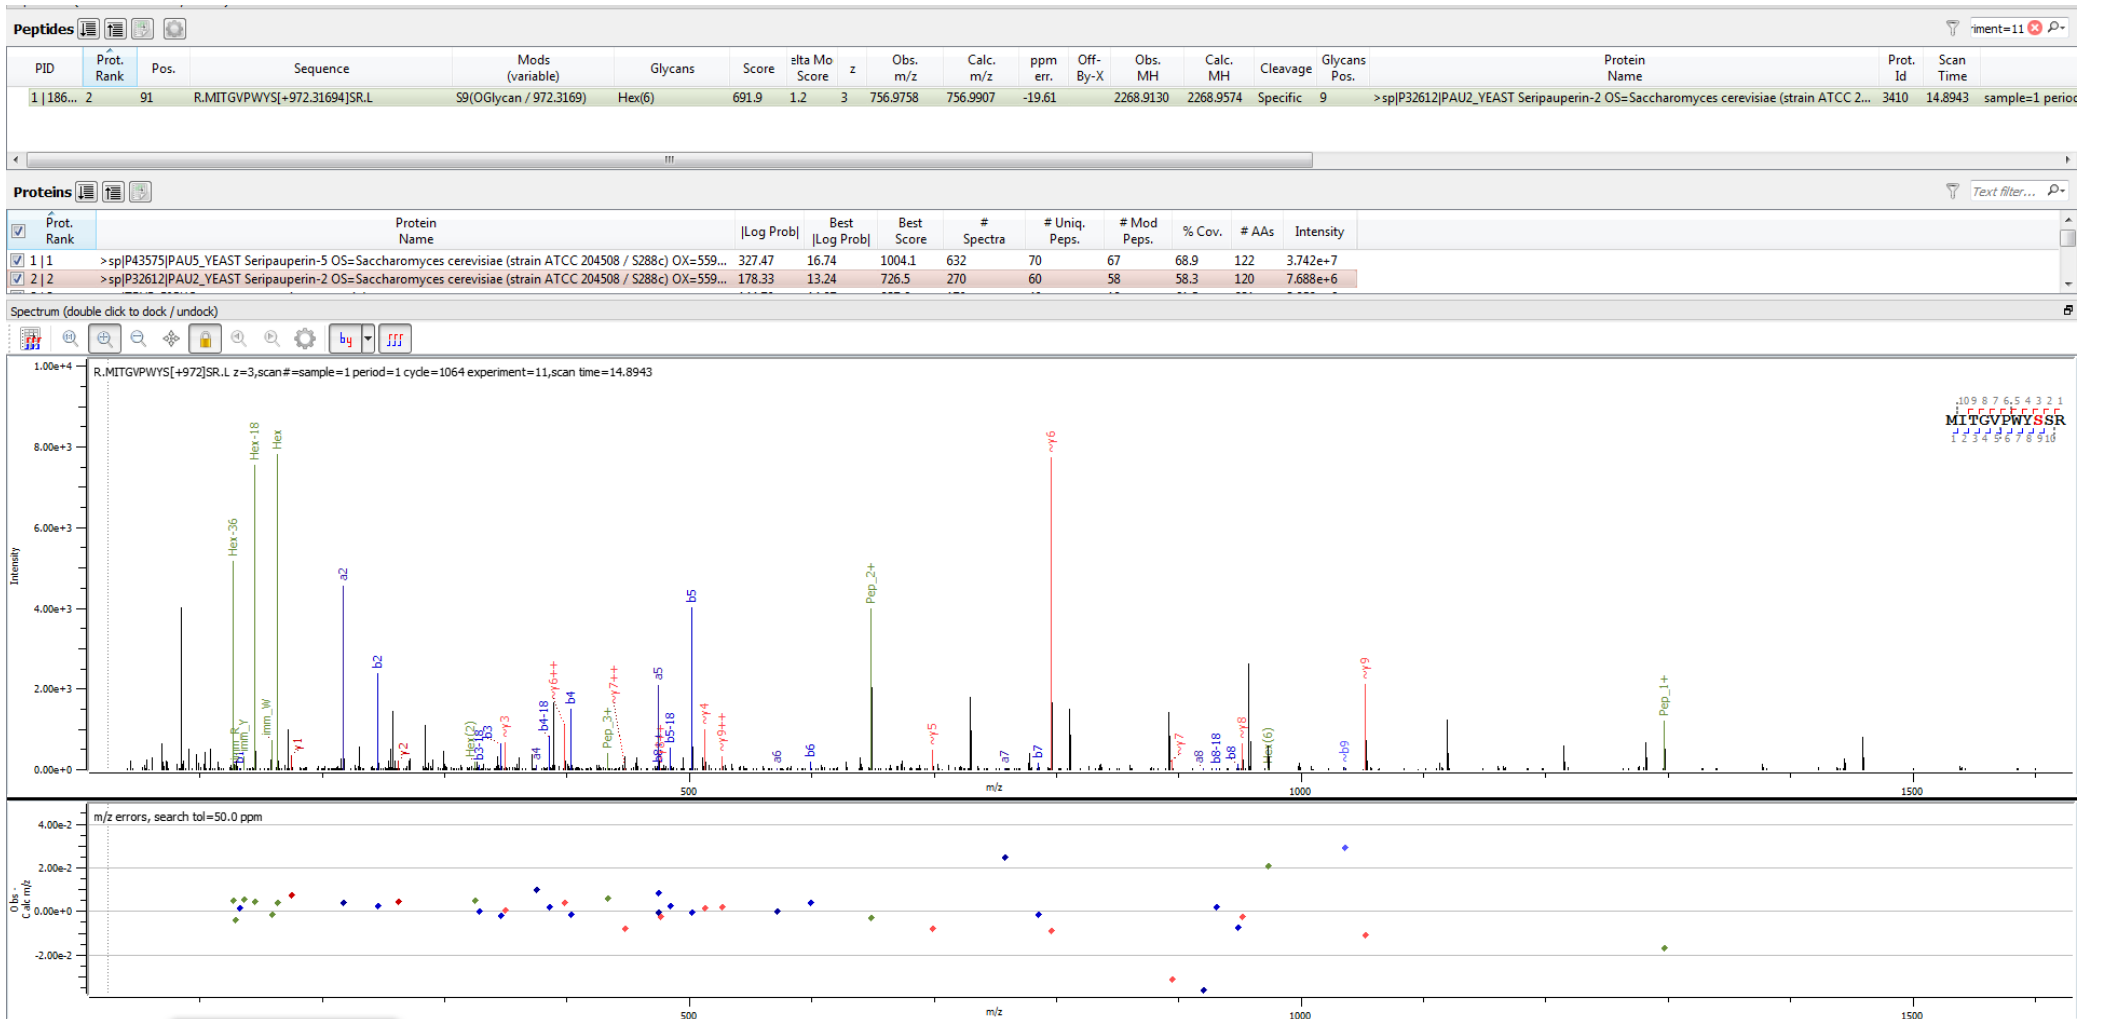

Sample S1 R.MITGVPWYS[+972.317]SR.L

| PID | Prot. Rank | Pos. | Sequence | Mods (variable)              | Glycans                 | Score  | delta Mo Score | z   | Obs. m/z | Calc. m/z | ppm err.  | Off-By-X | Obs. MH   | Calc. MH  | Cleavage | Glycans Pos. | Protein Name                                                                       | Prot. Id | Scan Time |                 |
|-----|------------|------|----------|------------------------------|-------------------------|--------|----------------|-----|----------|-----------|-----------|----------|-----------|-----------|----------|--------------|------------------------------------------------------------------------------------|----------|-----------|-----------------|
| 1   | 186...     | 2    | 91       | R.MITGVPWYS[+1134.36976]SR.L | S9(OGlycan / 1134.3698) | Hex(7) | 516.1          | 1.2 | 2        | 1215.9883 | 1216.0088 | -16.86   | 2430.9693 | 2431.0103 | Specific | 9            | >sp P32612 PAU2_YEAST Seripauperin-2 OS=Saccharomyces cerevisiae (strain ATCC 2... | 3410     | 14.8162   | sample=1 period |

| Prot. Rank | Protein Name                                                                                            | [Log Prob] | Best [Log Prob] | Best Score | # Spectra | # Uniq. Peps. | # Mod Peps. | % Cov. | # AAs | Intensity |
|------------|---------------------------------------------------------------------------------------------------------|------------|-----------------|------------|-----------|---------------|-------------|--------|-------|-----------|
| 1          | >sp P43575 PAU5_YEAST Seripauperin-5 OS=Saccharomyces cerevisiae (strain ATCC 204508 / S288c) OX=559... | 327.47     | 16.74           | 1004.1     | 632       | 70            | 67          | 68.9   | 122   | 3.742e+7  |
| 2          | >sp P32612 PAU2_YEAST Seripauperin-2 OS=Saccharomyces cerevisiae (strain ATCC 204508 / S288c) OX=559... | 178.33     | 13.24           | 726.5      | 270       | 60            | 58          | 58.3   | 120   | 7.688e+6  |

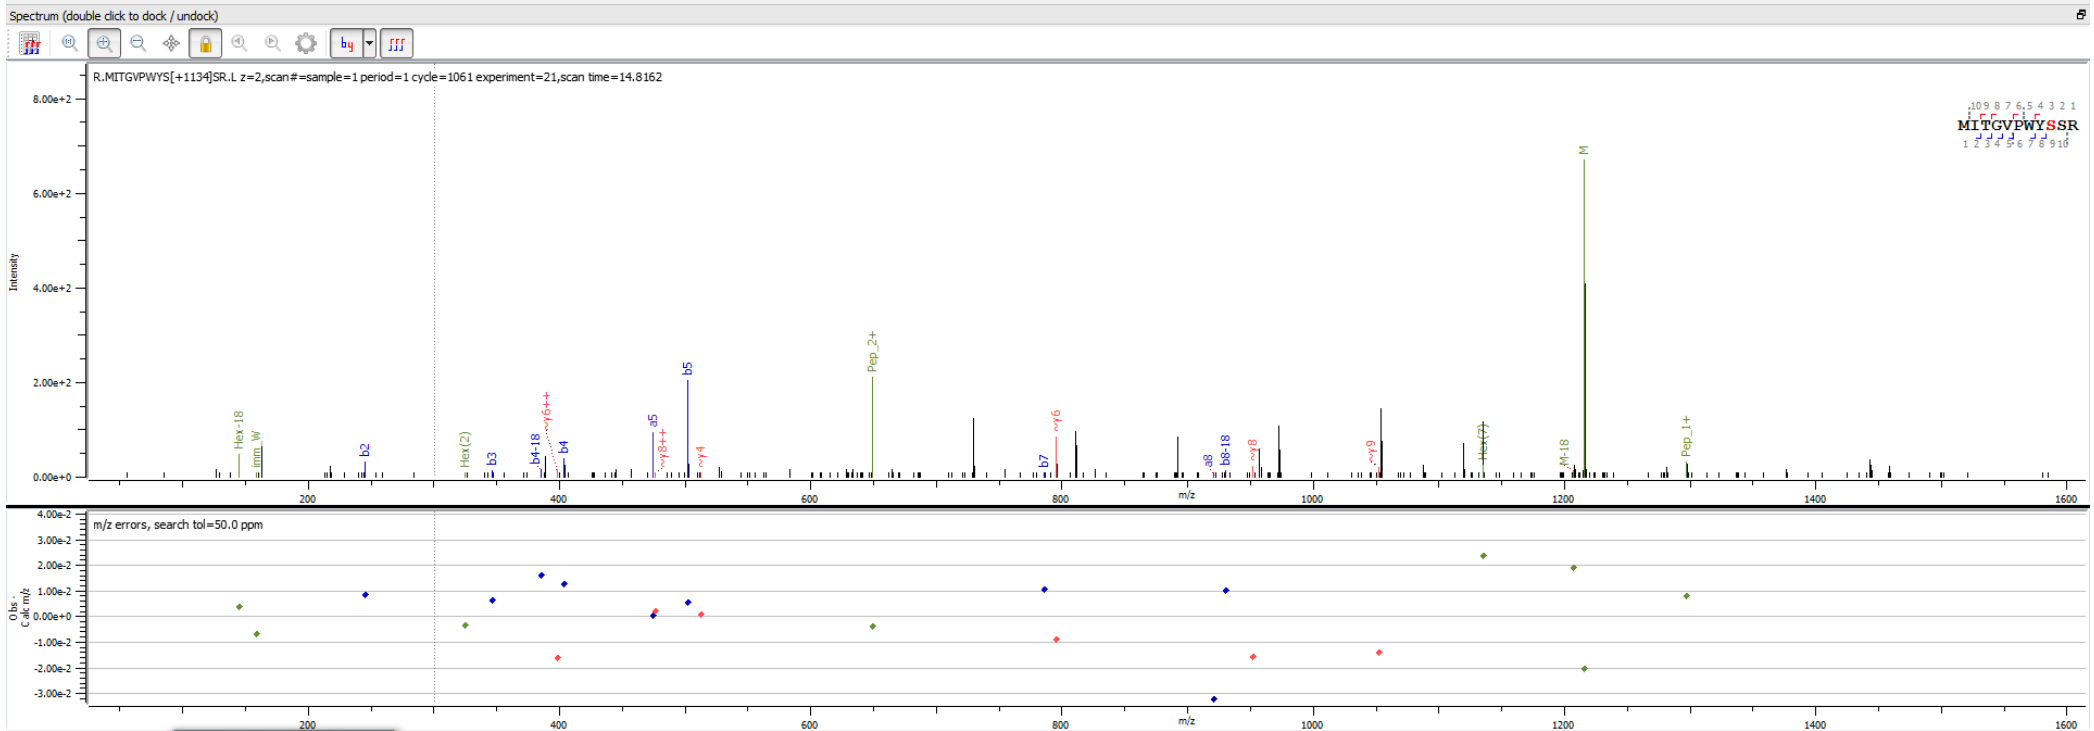

Sample S1 R.MITGVPWYS[+1134.370]SR.L

| PID | Prot. Rank | Pos. | Sequence | Mods (variable)              | Glycans                 | Score  | delta Mo Score | z   | Obs. m/z | Calc. m/z | ppm err. | Off-By-X | Obs. MH   | Calc. MH  | Cleavage | Glycans Pos. | Protein Name                                                                       | Prot. Id | Scan Time |                 |
|-----|------------|------|----------|------------------------------|-------------------------|--------|----------------|-----|----------|-----------|----------|----------|-----------|-----------|----------|--------------|------------------------------------------------------------------------------------|----------|-----------|-----------------|
| 1   | 132...     | 1    | 91       | R.MITGVPWYS[+1134.36976]SR.L | S9(OGlycan / 1134.3698) | Hex(7) | 636.2          | 1.2 | 3        | 810.9955  | 811.0083 | -15.75   | 2430.9720 | 2431.0103 | Specific | 9            | >sp Q3E770 PAU9_YEAST Seripauperin-9 OS=Saccharomyces cerevisiae (strain ATCC 2... | 3461     | 14.7986   | sample=1 period |

| Prot. Rank | Protein Name                                                                                            | [Log Prob] | Best [Log Prob] | Best Score | # Spectra | # Uniq. Peps. | # Mod Peps. | % Cov. | # AAs | Intensity |
|------------|---------------------------------------------------------------------------------------------------------|------------|-----------------|------------|-----------|---------------|-------------|--------|-------|-----------|
| 1          | >sp Q3E770 PAU9_YEAST Seripauperin-9 OS=Saccharomyces cerevisiae (strain ATCC 204508 / S288c) OX=559... | 288.60     | 16.66           | 988.6      | 452       | 61            | 56          | 60.8   | 120   | 1.023e+7  |
| 2          | >sp Q07987 PAU23_YEAST Seripauperin-23 OS=Saccharomyces cerevisiae (strain ATCC 204508 / S288c) OX=5... | 160.38     | 13.28           | 718.6      | 124       | 39            | 36          | 43.5   | 124   | 2.323e+6  |
| 3          | >sp P43575 PAU5_YEAST Seripauperin-5 OS=Saccharomyces cerevisiae (strain ATCC 204508 / S288c) OX=559... | 142.55     | 14.15           | 737.1      | 167       | 35            | 33          | 42.6   | 122   | 6.136e+6  |
| 4          | >celK2C1_HUMAN((Common contaminant protein))                                                            | 101.54     | 13.42           | 952.1      | 37        | 11            | 0           | 20.4   | 642   | 1.801e+5  |

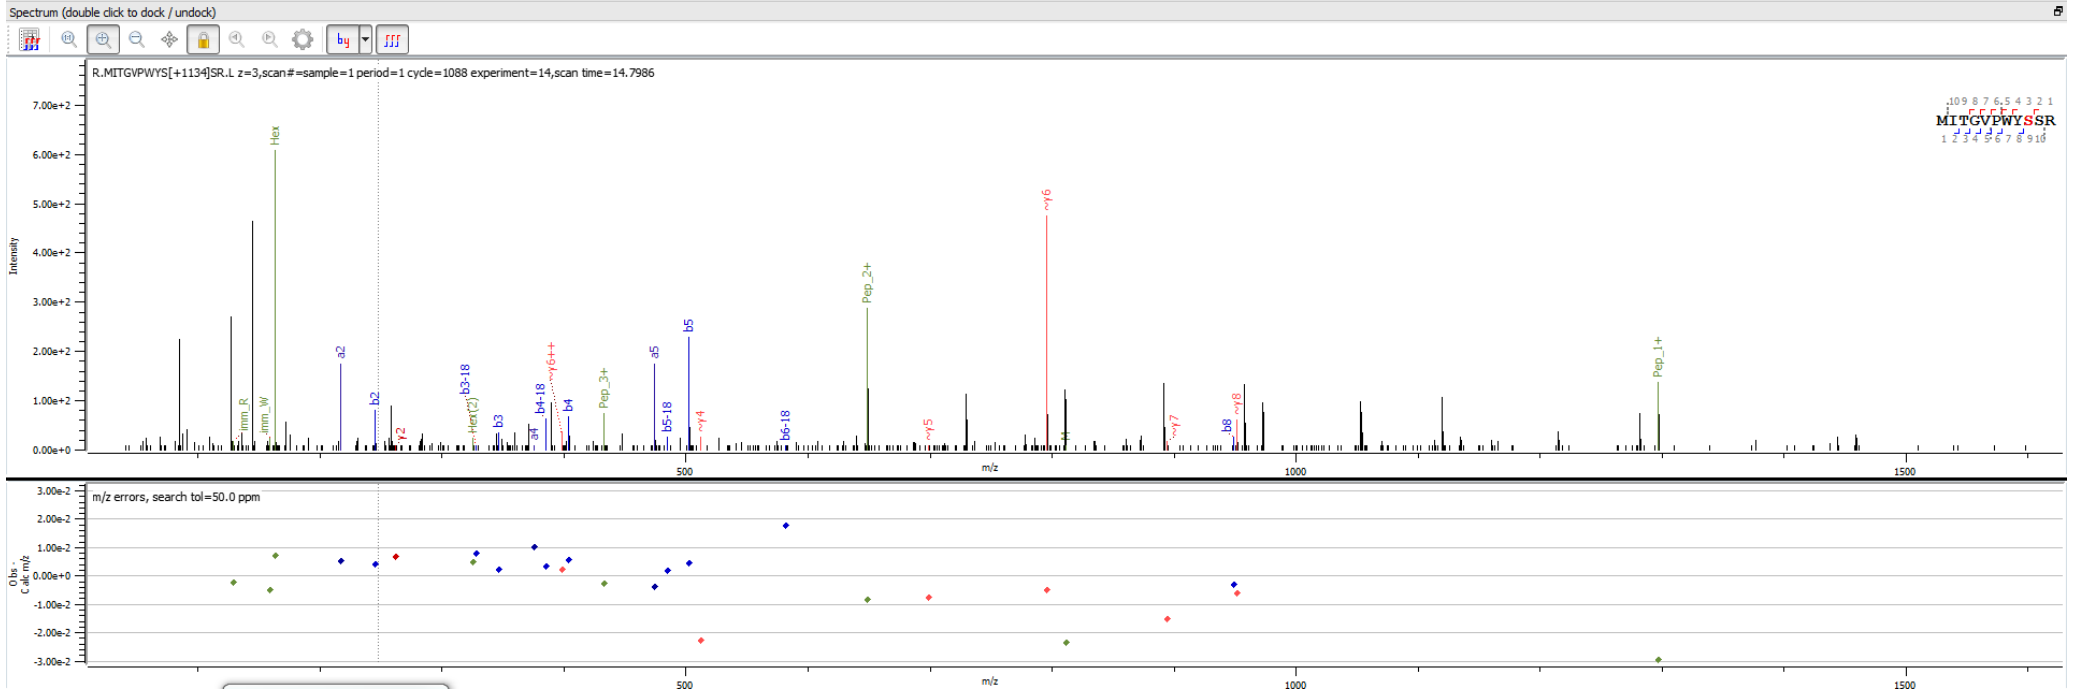

Sample S6 R.MITGVPWYS[+1134.370]SR.L

| PID | Prot. Rank | Pos. | Sequence | Mods (variable)                | Glycans                | Score  | alta Mo Score | z    | Obs. m/z | Calc. m/z | ppm err. | Off-By-X | Obs. MH   | Calc. MH  | Cleavage  | Glycans Pos.                                                                      | Protein Name | Prot. Id | Scan Time        |
|-----|------------|------|----------|--------------------------------|------------------------|--------|---------------|------|----------|-----------|----------|----------|-----------|-----------|-----------|-----------------------------------------------------------------------------------|--------------|----------|------------------|
| 1   | 1814...    | 3    | 21       | A.APATT[+648.21129]TLSPSPDER.V | T5(OGlycan / 648.2113) | Hex(4) | 389.1         | 11.4 | 3        | 665.2840  | 665.2951 | -16.65   | 1993.8375 | 1993.8707 | NRagged 5 | >sp P0CE85 PAU19_YEAST Seripauperin-19 OS=Saccharomyces cerevisiae (strain ATC... | 3420         | 8.4575   | sample=1 period= |

| Prot. Rank | Protein Name | [Log Prob]                                                                                              | Best [Log Prob] | Best Score | # Spectra | # Uniq. Peps. | # Mod Peps. | % Cov. | # AAs | Intensity |          |
|------------|--------------|---------------------------------------------------------------------------------------------------------|-----------------|------------|-----------|---------------|-------------|--------|-------|-----------|----------|
| 1          | 1            | >sp Q3E770 PAU9_YEAST Seripauperin-9 OS=Saccharomyces cerevisiae (strain ATCC 204508 / S288c) OX=559... | 248.32          | 15.68      | 955.8     | 342           | 58          | 55     | 67.5  | 120       | 1.797e+7 |

Spectrum (double click to dock / undock)

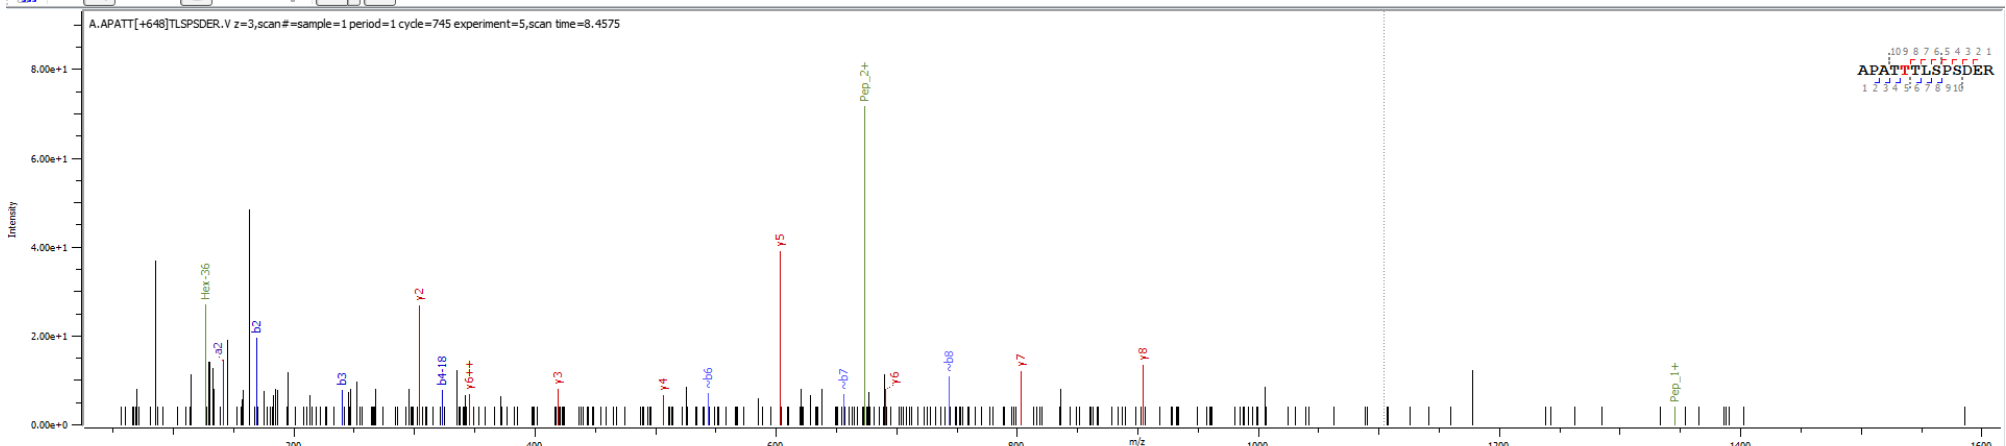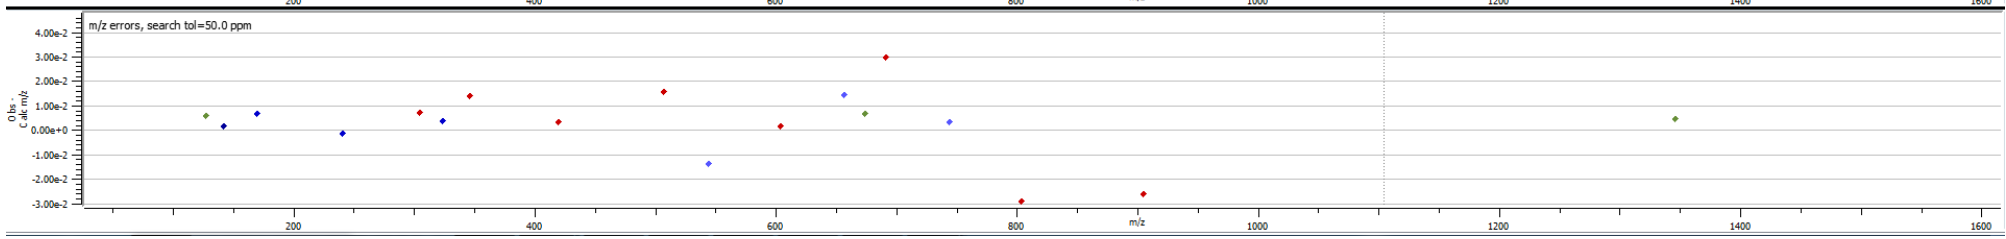

Sample S3 A.APATT[+648.211]TLSPSPDER.V



Peptides

| PID        | Prot. Rank | Pos. | Sequence                      | Mods (variable)        | Glycans | Score | delta Mo Score | z | Obs. m/z | Calc. m/z | ppm err. | Off-By-X | Obs. MH   | Calc. MH  | Cleavage  | Glycans Pos. | Protein Name                                                                       | Prot. Id | Scan Time |                 |
|------------|------------|------|-------------------------------|------------------------|---------|-------|----------------|---|----------|-----------|----------|----------|-----------|-----------|-----------|--------------|------------------------------------------------------------------------------------|----------|-----------|-----------------|
| 1   118... | 2          | 21   | A.APAT(+810.26412)TTLSPSDER.V | T4(Oglycan / 810.2641) | Hex(5)  | 562.4 | 0.8            | 3 | 719.2986 | 719.3127  | -19.57   |          | 2155.8813 | 2155.9235 | NRagged 4 |              | >sp Q07987 PAU23_YEAST Seripauperin-23 OS=Saccharomyces cerevisiae (strain ATCC... | 3438     | 8.1072    | sample=1 period |

Proteins

| Prot. Rank | Protein Name                                                                                            | [Log Prob] | Best [Log Prob] | Best Score | # Spectra | # Uniq. Peps. | # Mod Peps. | % Cov. | # AAs | Intensity |
|------------|---------------------------------------------------------------------------------------------------------|------------|-----------------|------------|-----------|---------------|-------------|--------|-------|-----------|
| 1   1      | >sp Q3E770 PAU9_YEAST Seripauperin-9 OS=Saccharomyces cerevisiae (strain ATCC 204508 / S288c) OX=559... | 288.60     | 16.66           | 988.6      | 452       | 61            | 56          | 60.8   | 120   | 1.023e+7  |
| 2   2      | >sp Q07987 PAU23_YEAST Seripauperin-23 OS=Saccharomyces cerevisiae (strain ATCC 204508 / S288c) OX=5... | 160.38     | 13.28           | 718.6      | 124       | 39            | 36          | 43.5   | 124   | 2.323e+6  |
| 3   3      | >sp P43575 PAU5_YEAST Seripauperin-5 OS=Saccharomyces cerevisiae (strain ATCC 204508 / S288c) OX=559... | 142.55     | 14.15           | 737.1      | 167       | 35            | 33          | 42.6   | 122   | 6.136e+6  |
| 4   4      | >sp K2C1_HUMAN  Common contaminant protein)                                                             | 101.54     | 13.43           | 653.1      | 37        | 11            | 0           | 20.4   | 643   | 1.801e+5  |

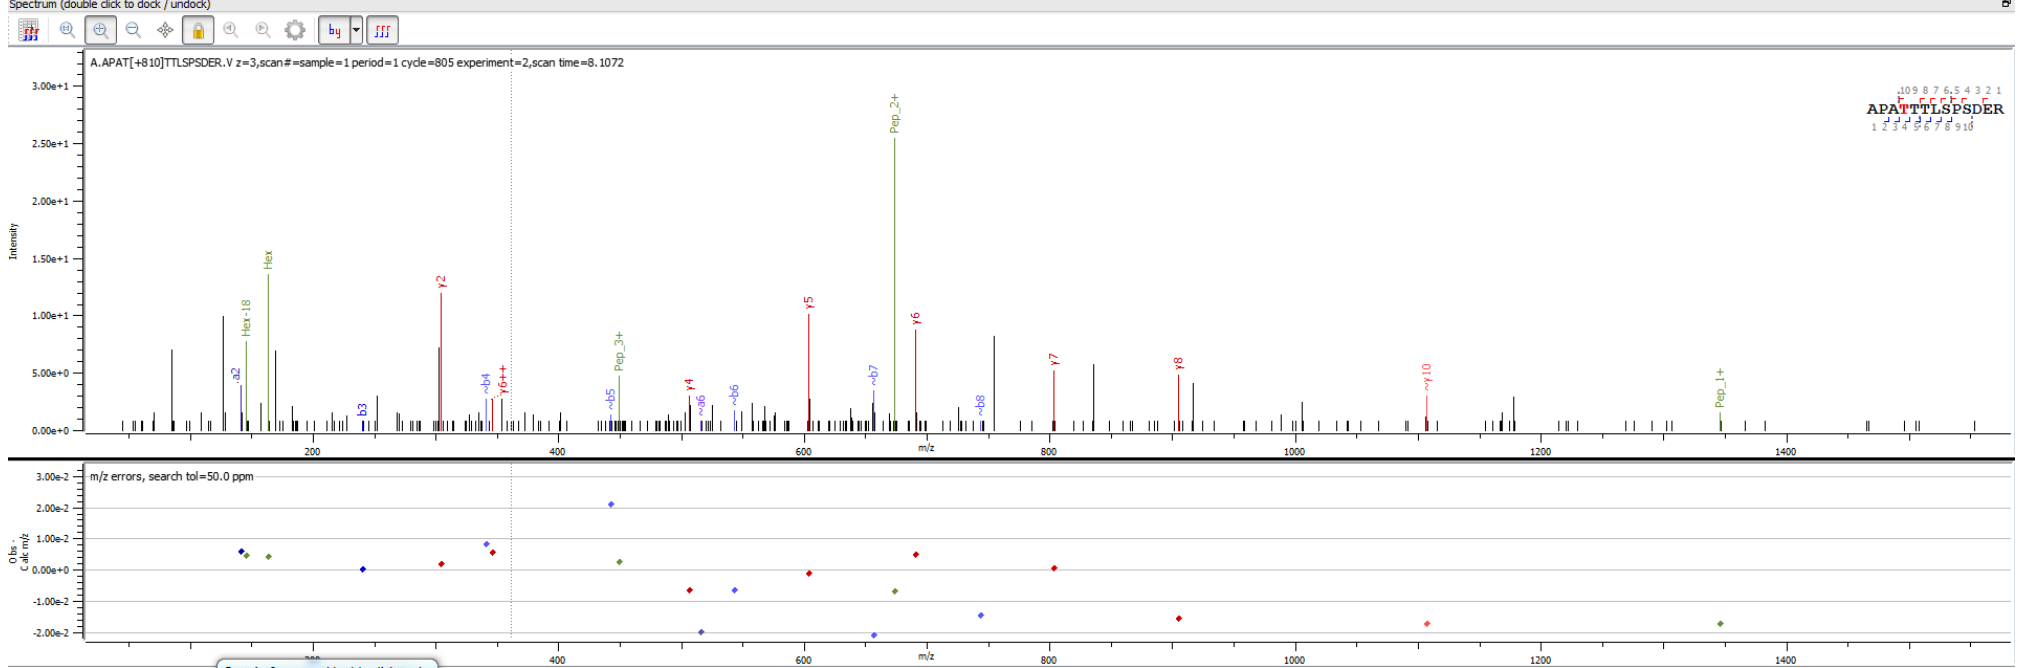

Sample S6      A.APAT(+810.264)TTLSPSDER.V

| PID | Prot. Rank | Pos. | Sequence                       | Mods (variable)        | Glycans | Score | alta Mo Score | z | Obs. m/z | Calc. m/z | ppm err. | Off-By-X | Obs. MH   | Calc. MH  | Cleavage  | Glycans Pos. | Protein Name                                                                      | Prot. Id | Scan Time              |
|-----|------------|------|--------------------------------|------------------------|---------|-------|---------------|---|----------|-----------|----------|----------|-----------|-----------|-----------|--------------|-----------------------------------------------------------------------------------|----------|------------------------|
| 1   | 118...     | 2    | A.APATTT[+972.31694]LSPSPDER.V | T6(Oglycan / 972.3169) | Hex(6)  | 702.4 | 0.0           | 3 | 773.3154 | 773.3303  | -19.32   |          | 2317.9315 | 2317.9763 | NRagged 6 |              | >sp Q07987 PAU23_YEAST Seripauperin-23 OS=Saccharomyces cerevisiae (strain ATC... | 3438     | 8.1732 sample=1 period |

| Prot. Rank | Protein Name                                                                                            | [Log Prob] | Best [Log Prob] | Best Score | # Spectra | # Uniq. Peps. | # Mod Peps. | % Cov. | # AAs | Intensity |
|------------|---------------------------------------------------------------------------------------------------------|------------|-----------------|------------|-----------|---------------|-------------|--------|-------|-----------|
| 1          | >sp Q3E770 PAU9_YEAST Seripauperin-9 OS=Saccharomyces cerevisiae (strain ATCC 204508 / S288c) OX=559... | 288.60     | 16.66           | 988.6      | 452       | 61            | 56          | 60.8   | 120   | 1.023e+7  |
| 2          | >sp Q07987 PAU23_YEAST Seripauperin-23 OS=Saccharomyces cerevisiae (strain ATCC 204508 / S288c) OX=5... | 160.38     | 13.28           | 718.6      | 124       | 39            | 36          | 43.5   | 124   | 2.323e+6  |
| 3          | >sp P43575 PAU5_YEAST Seripauperin-5 OS=Saccharomyces cerevisiae (strain ATCC 204508 / S288c) OX=559... | 142.55     | 14.15           | 737.1      | 167       | 35            | 33          | 42.6   | 122   | 6.136e+6  |
| 4          | >cal K2C1_HUMAN Common contaminant protein                                                              | 101.54     | 12.42           | 952.1      | 27        | 11            | 0           | 20.4   | 642   | 1.801e+5  |

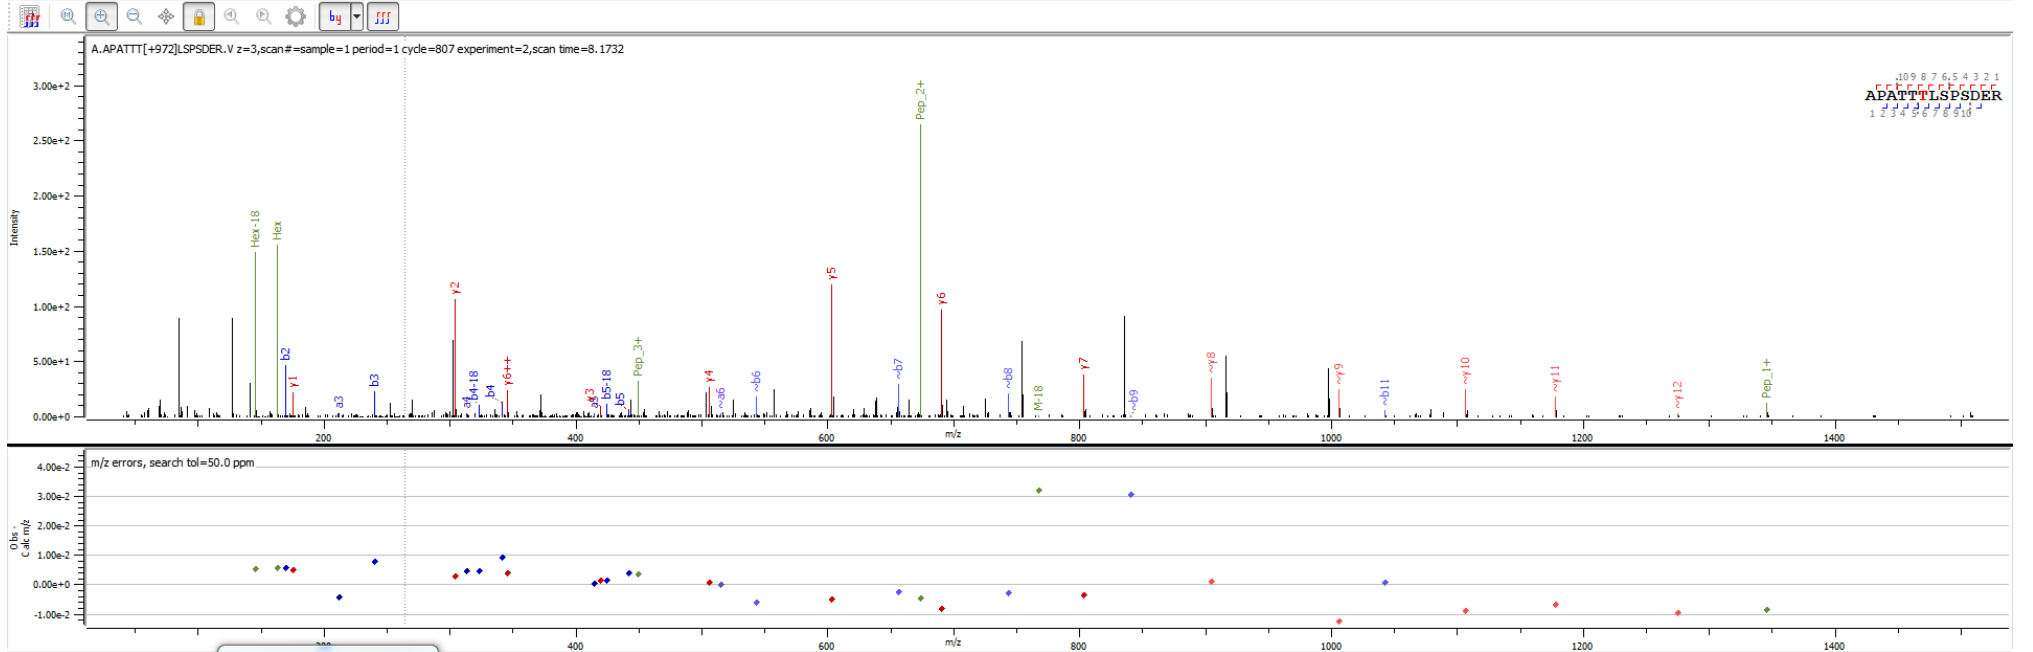

Sample S6 A.APATTT[+972.317]LSPSPDER.V

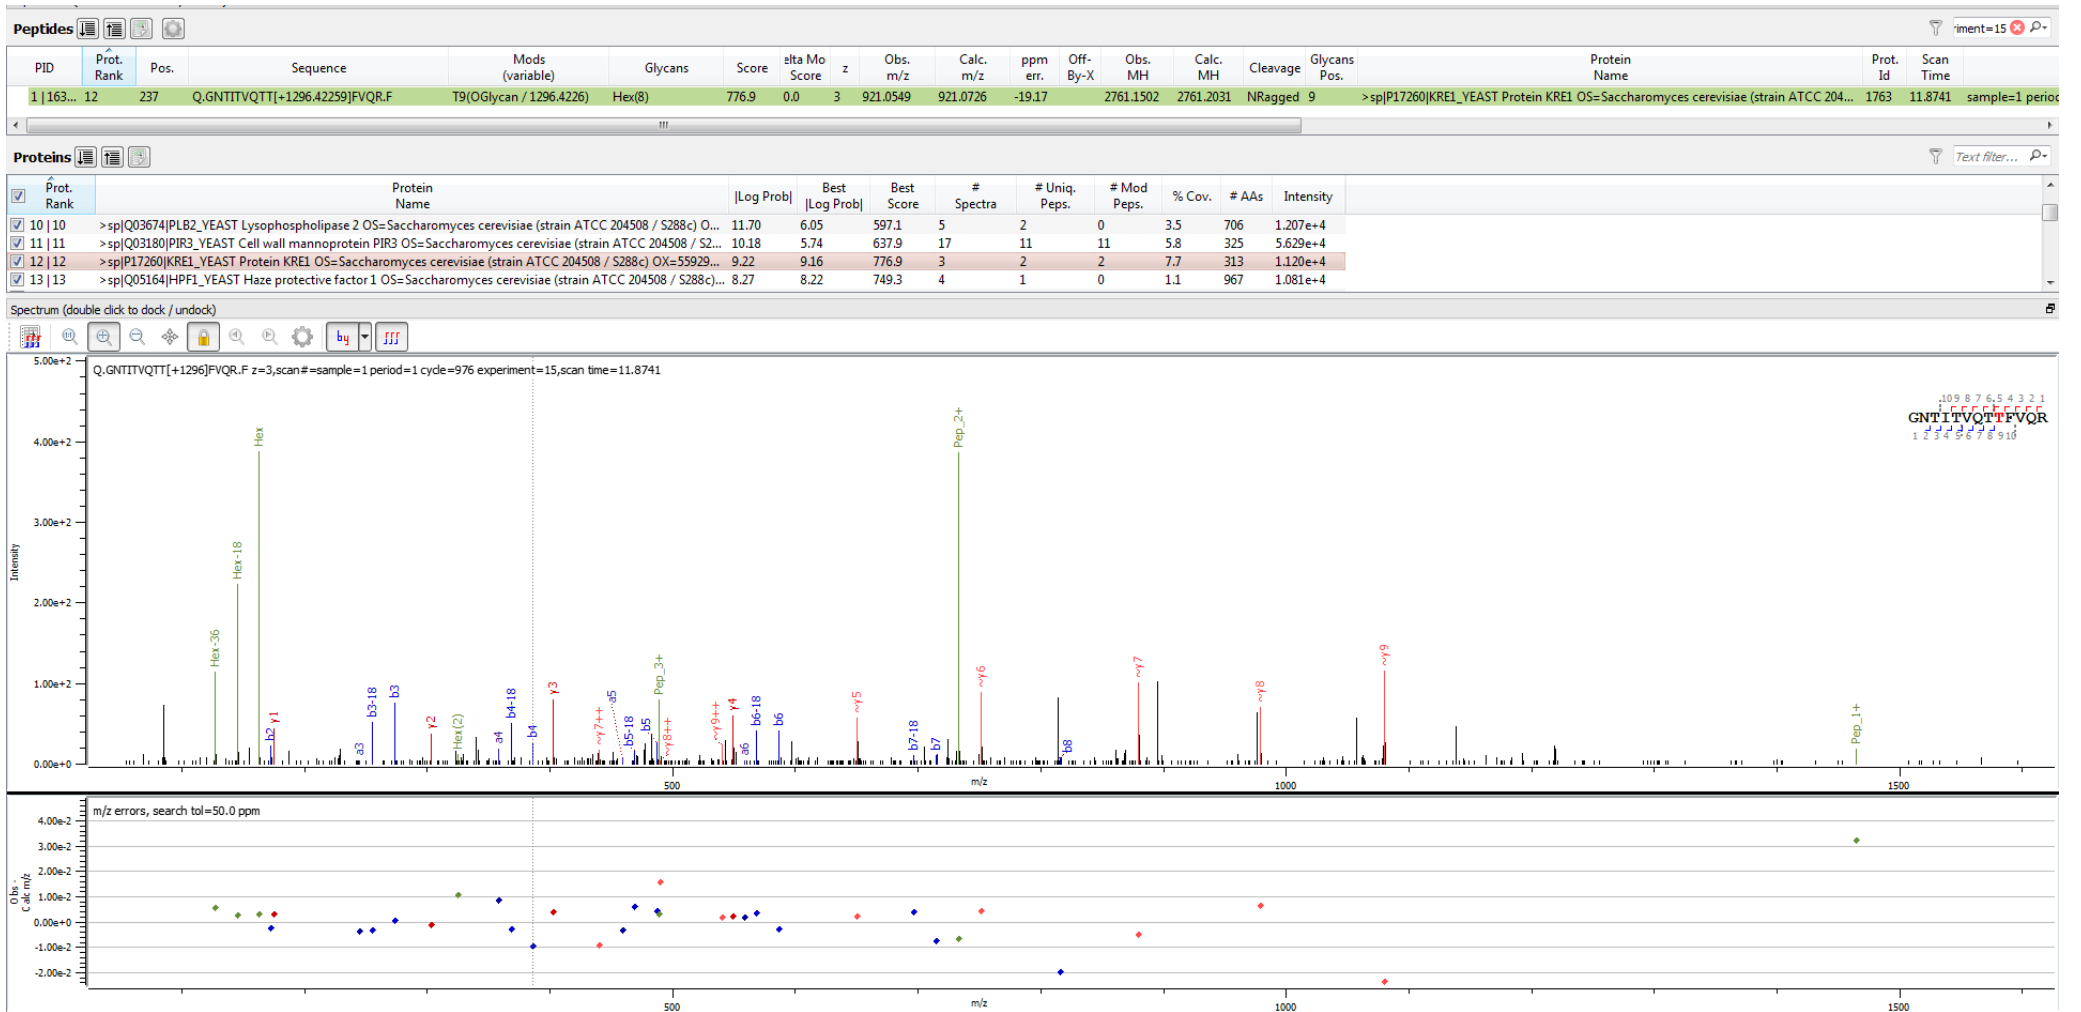

Sample S2 Q.GNTITVQTT[+1296.423]FVQR.F

| PID     | Prot. Rank | Pos. | Sequence                     | Mods (variable)        | Glycans | Score | delta Mo Score | z | Obs. m/z  | Calc. m/z | ppm err. | Off-By-X | Obs. MH   | Calc. MH  | Cleavage | Glycans Pos. | Protein Name                                                                           | Prot. Id | Scan Time                |
|---------|------------|------|------------------------------|------------------------|---------|-------|----------------|---|-----------|-----------|----------|----------|-----------|-----------|----------|--------------|----------------------------------------------------------------------------------------|----------|--------------------------|
| 1101... | 5          | 20   | A.ASVTTTLS[+648.2119]PYDER.V | S8(OGlycan / 648.2113) | Hex(4)  | 474.4 | 0.0            | 2 | 1044.4477 | 1044.4599 | -11.66   |          | 2087.8882 | 2087.9125 | NRagged  | 8            | >sp P47178 DANI1_YEAST Cell wall protein DANI1 OS=Saccharomyces cerevisiae (strain ... | 298      | 11.6045 sample=1 period= |

| Prot. Rank | Protein Name                                                                                            | [Log Prob] | Best [Log Prob] | Best Score | # Spectra | # Uniq. Peps. | # Mod Peps. | % Cov. | # AAs | Intensity |
|------------|---------------------------------------------------------------------------------------------------------|------------|-----------------|------------|-----------|---------------|-------------|--------|-------|-----------|
| 1          | >sp P32612 PAU2_YEAST Seripauperin-2 OS=Saccharomyces cerevisiae (strain ATCC 204508 / S288c) OX=559... | 304.25     | 17.48           | 982.9      | 381       | 64            | 61          | 67.5   | 120   | 1.839e+7  |
| 2          | >sp P0CE85 PAU19_YEAST Seripauperin-19 OS=Saccharomyces cerevisiae (strain ATCC 204508 / S288c) OX=5... | 138.61     | 11.51           | 683.8      | 93        | 32            | 31          | 42.7   | 124   | 3.148e+6  |
| 3          | >sp P43575 PAU5_YEAST Seripauperin-5 OS=Saccharomyces cerevisiae (strain ATCC 204508 / S288c) OX=559... | 129.60     | 12.22           | 721.6      | 114       | 28            | 27          | 53.3   | 122   | 7.378e+6  |
| 4          | >sp P0CF01 PAU18_YEAST Seripauperin-18 OS=Saccharomyces cerevisiae (strain ATCC 204508 / S288c) OX=5... | 62.54      | 11.00           | 666.6      | 12        | 0             | 0           | 0.2    | 120   | 2.115e+5  |

Spectrum (double click to dock / undock)

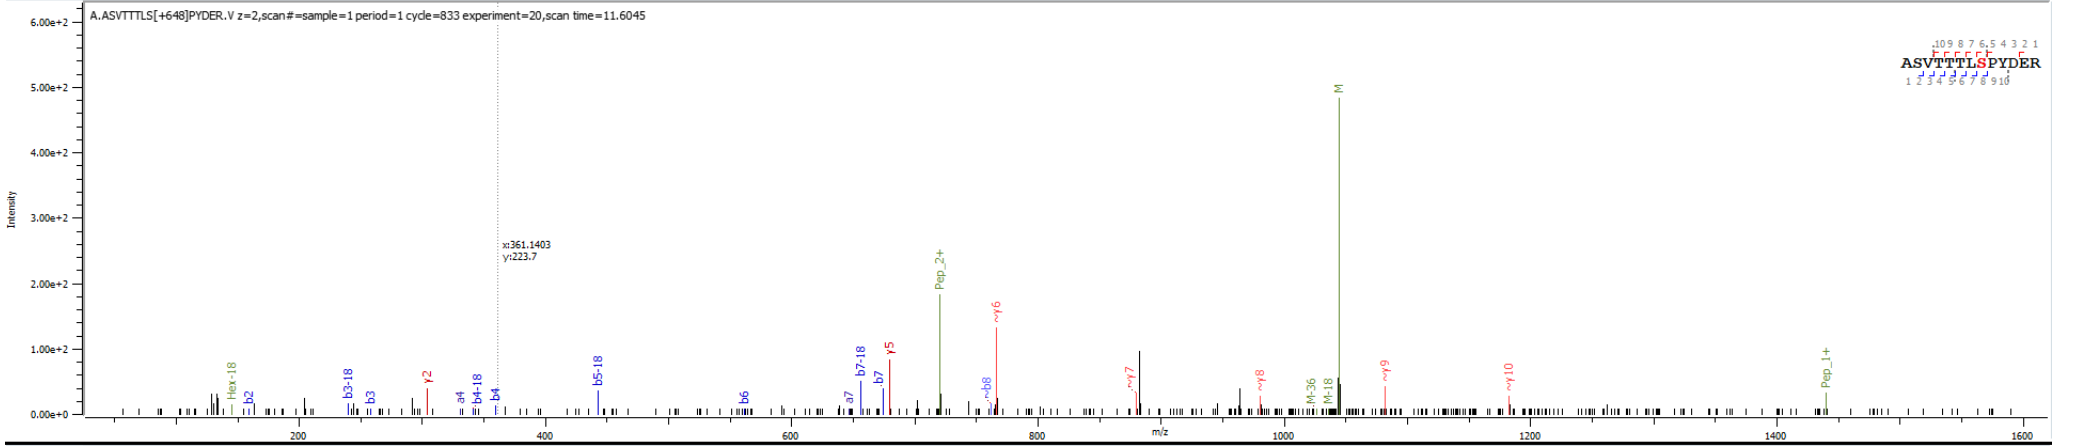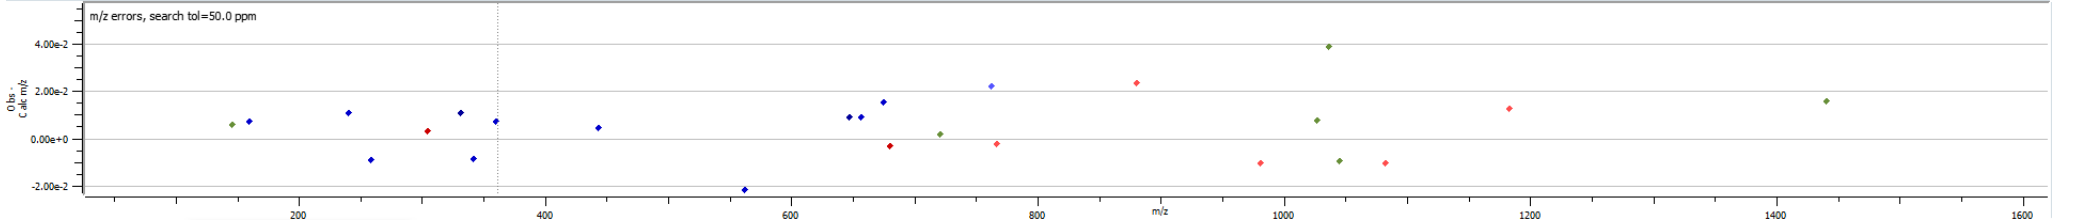

Sample S4      A.ASVTTTLS[+648.211]PYDER.V

| PID        | Prot. Rank | Pos. | Sequence                      | Mods (variable)        | Glycans | Score | delta Mo Score | z | Obs. m/z | Calc. m/z | ppm err. | Off-By-X | Obs. MH   | Calc. MH  | Cleavage  | Glycans Pos. | Protein Name                                                                          | Prot. Id | Scan Time |                 |
|------------|------------|------|-------------------------------|------------------------|---------|-------|----------------|---|----------|-----------|----------|----------|-----------|-----------|-----------|--------------|---------------------------------------------------------------------------------------|----------|-----------|-----------------|
| 1   122... | 10         | 20   | A.ASVTTTLS[+972.31694]PYDER.V | S8(Oglycan / 972.3169) | Hex(6)  | 717.7 | 1.2            | 3 | 804.6659 | 804.6776  | -14.52   |          | 2411.9832 | 2412.0182 | NRagged 8 |              | >sp P47178 DANI1_YEAST Cell wall protein DANI OS=Saccharomyces cerevisiae (strain ... | 298      | 10.8592   | sample=1 period |

| Prot. Rank | Protein Name                                                                                                 | [Log Prob] | Best [Log Prob] | Best Score | # Spectra | # Uniq. Peps. | # Mod Peps. | % Cov. | # AAs | Intensity |
|------------|--------------------------------------------------------------------------------------------------------------|------------|-----------------|------------|-----------|---------------|-------------|--------|-------|-----------|
| 10   10    | >sp P47178 DANI1_YEAST Cell wall protein DANI OS=Saccharomyces cerevisiae (strain ATCC 204508 / S288c) ...   | 22.21      | 11.15           | 731.5      | 10        | 6             | 6           | 11.7   | 298   | 8.248e+4  |
| 11   11    | >sp P53301 CRH1_YEAST Probable glycosidase CRH1 OS=Saccharomyces cerevisiae (strain ATCC 204508 / S2...      | 20.22      | 7.86            | 610.2      | 15        | 5             | 0           | 9.5    | 507   | 2.426e+4  |
| 12   12    | >sp P39005 KRE9_YEAST Cell wall synthesis protein KRE9 OS=Saccharomyces cerevisiae (strain ATCC 204508 / ... | 19.98      | 15.00           | 926.4      | 2         | 2             | 1           | 13.8   | 276   | 7.218e+3  |
| 13   13    | >sp D38616 VGG1_YEAST Protein VGG1 OS=Saccharomyces cerevisiae (strain ATCC 204508 / S288c) OY=55020         | 18.40      | 12.21           | 767.7      | 4         | 2             | 0           | 8.5    | 254   | 1.708e+4  |

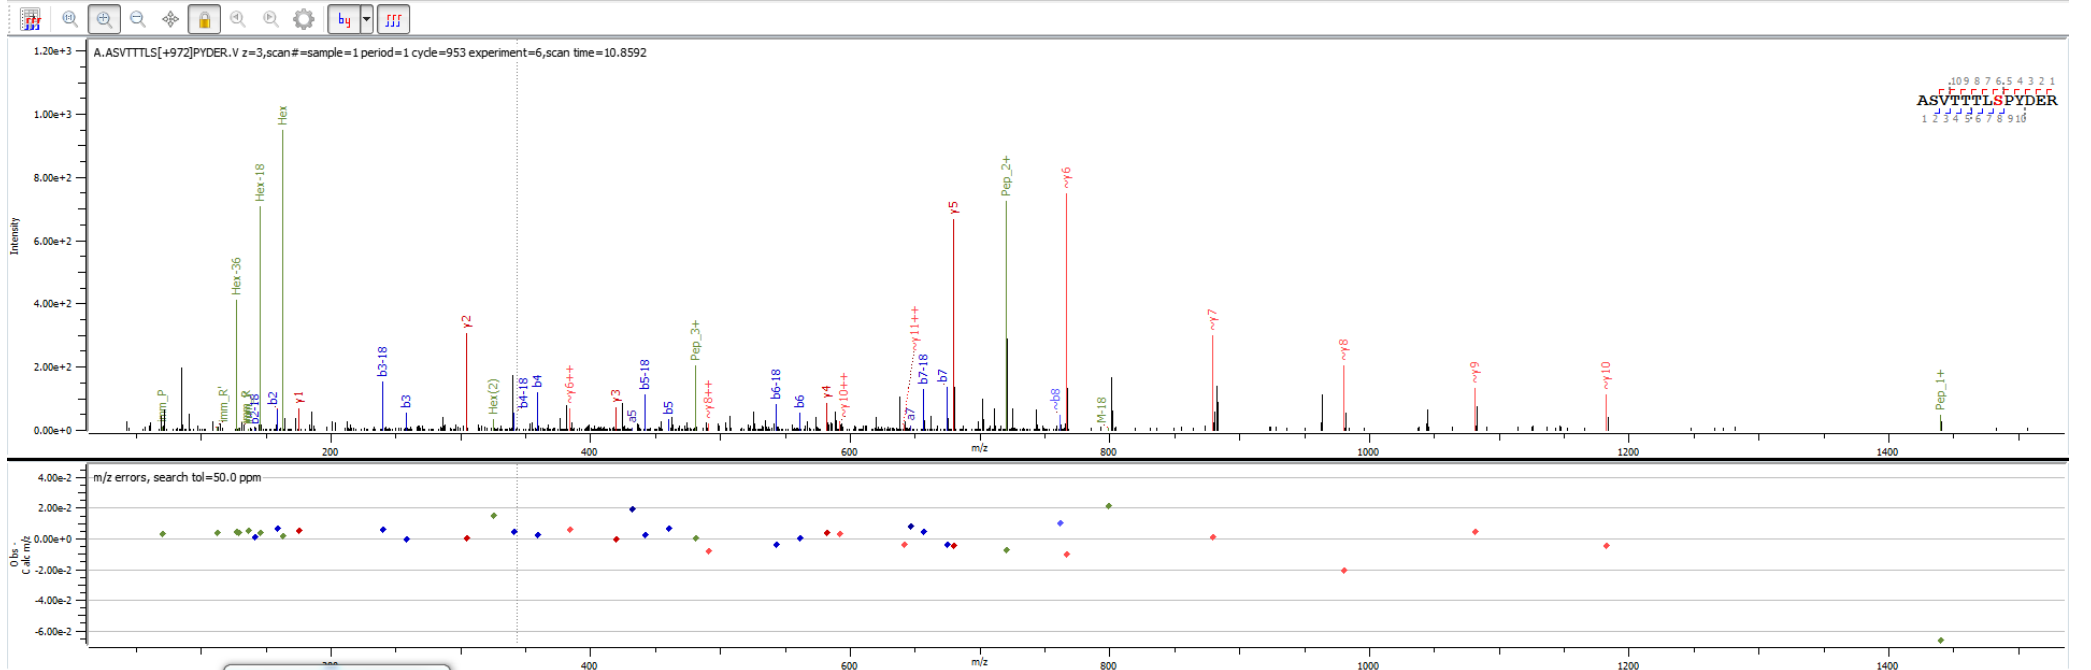

Sample S6 A.ASVTTTLS[+972.317]PYDER.V

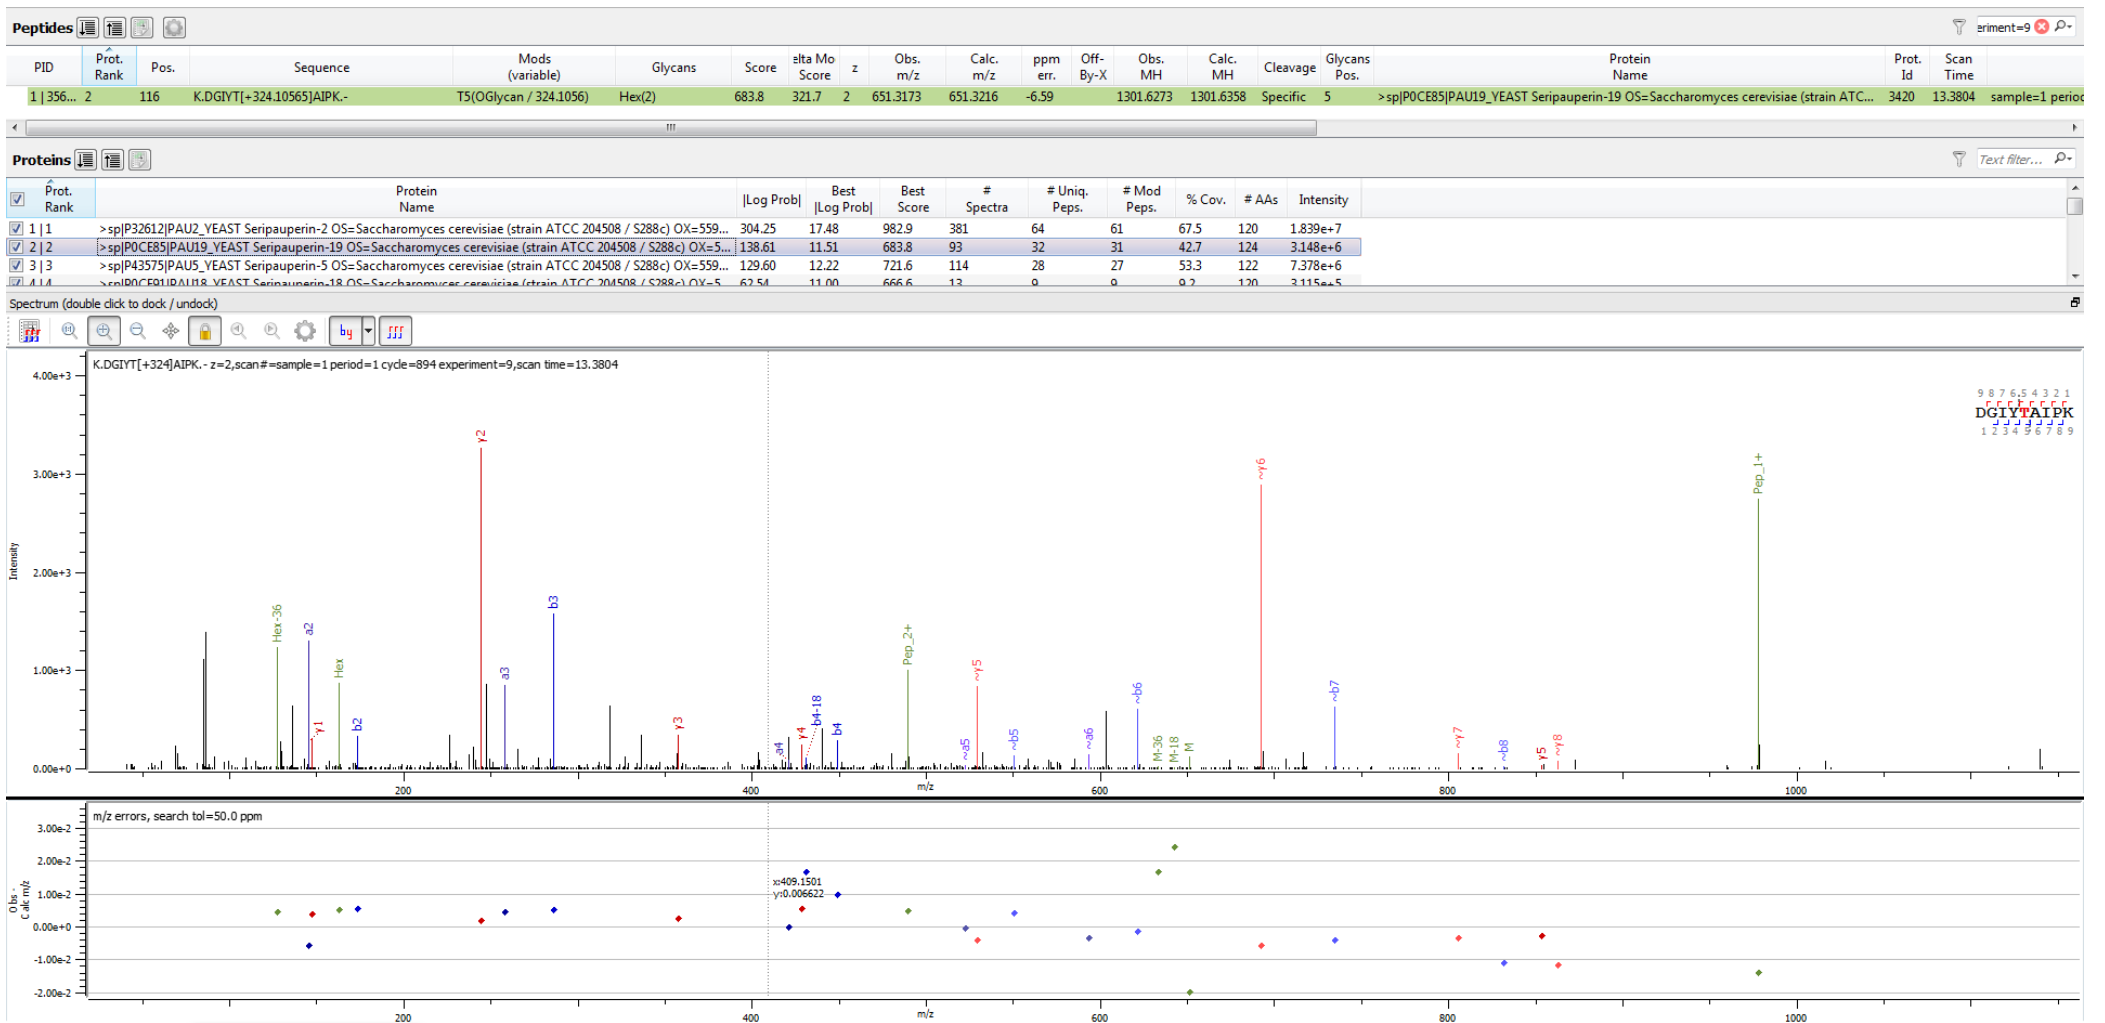

Sample S4 K.DGIYT[+324.106]AIPK.-

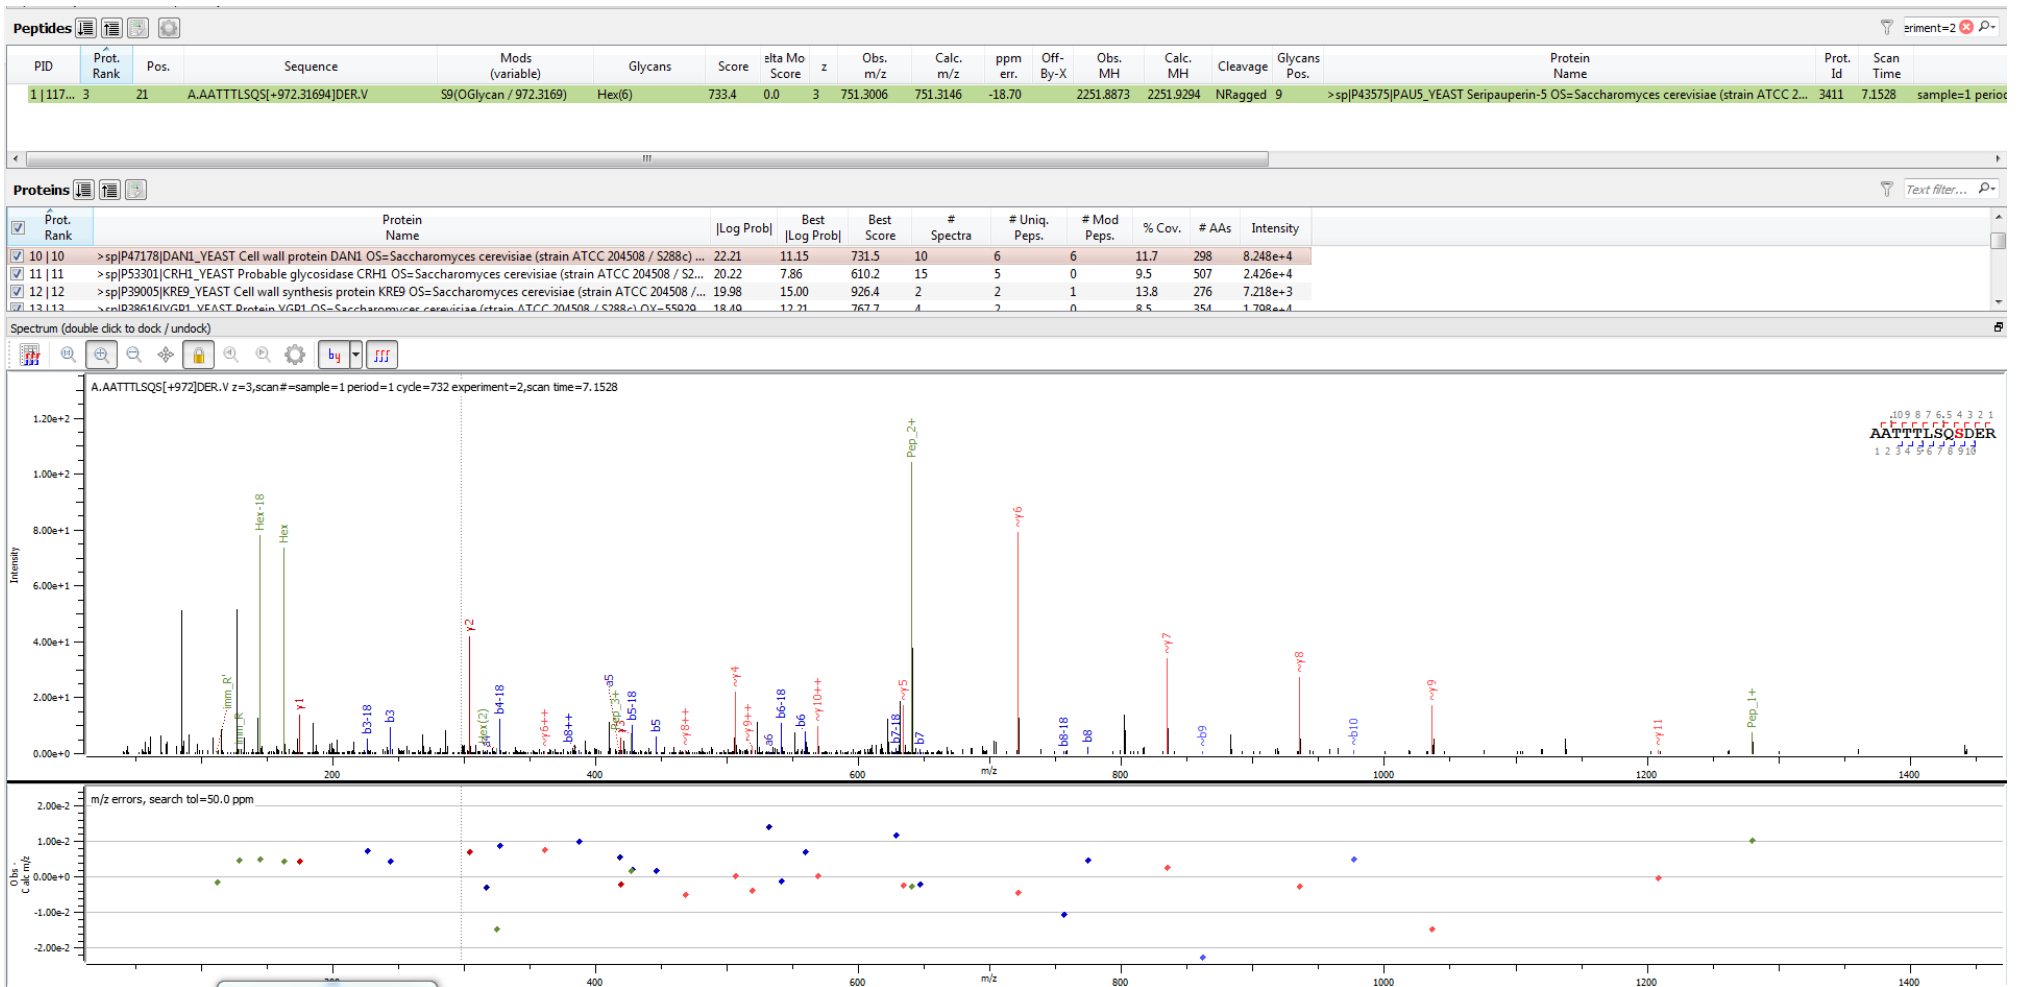

Sample S6 A.AATTTLSQS[+972.317]DER.V

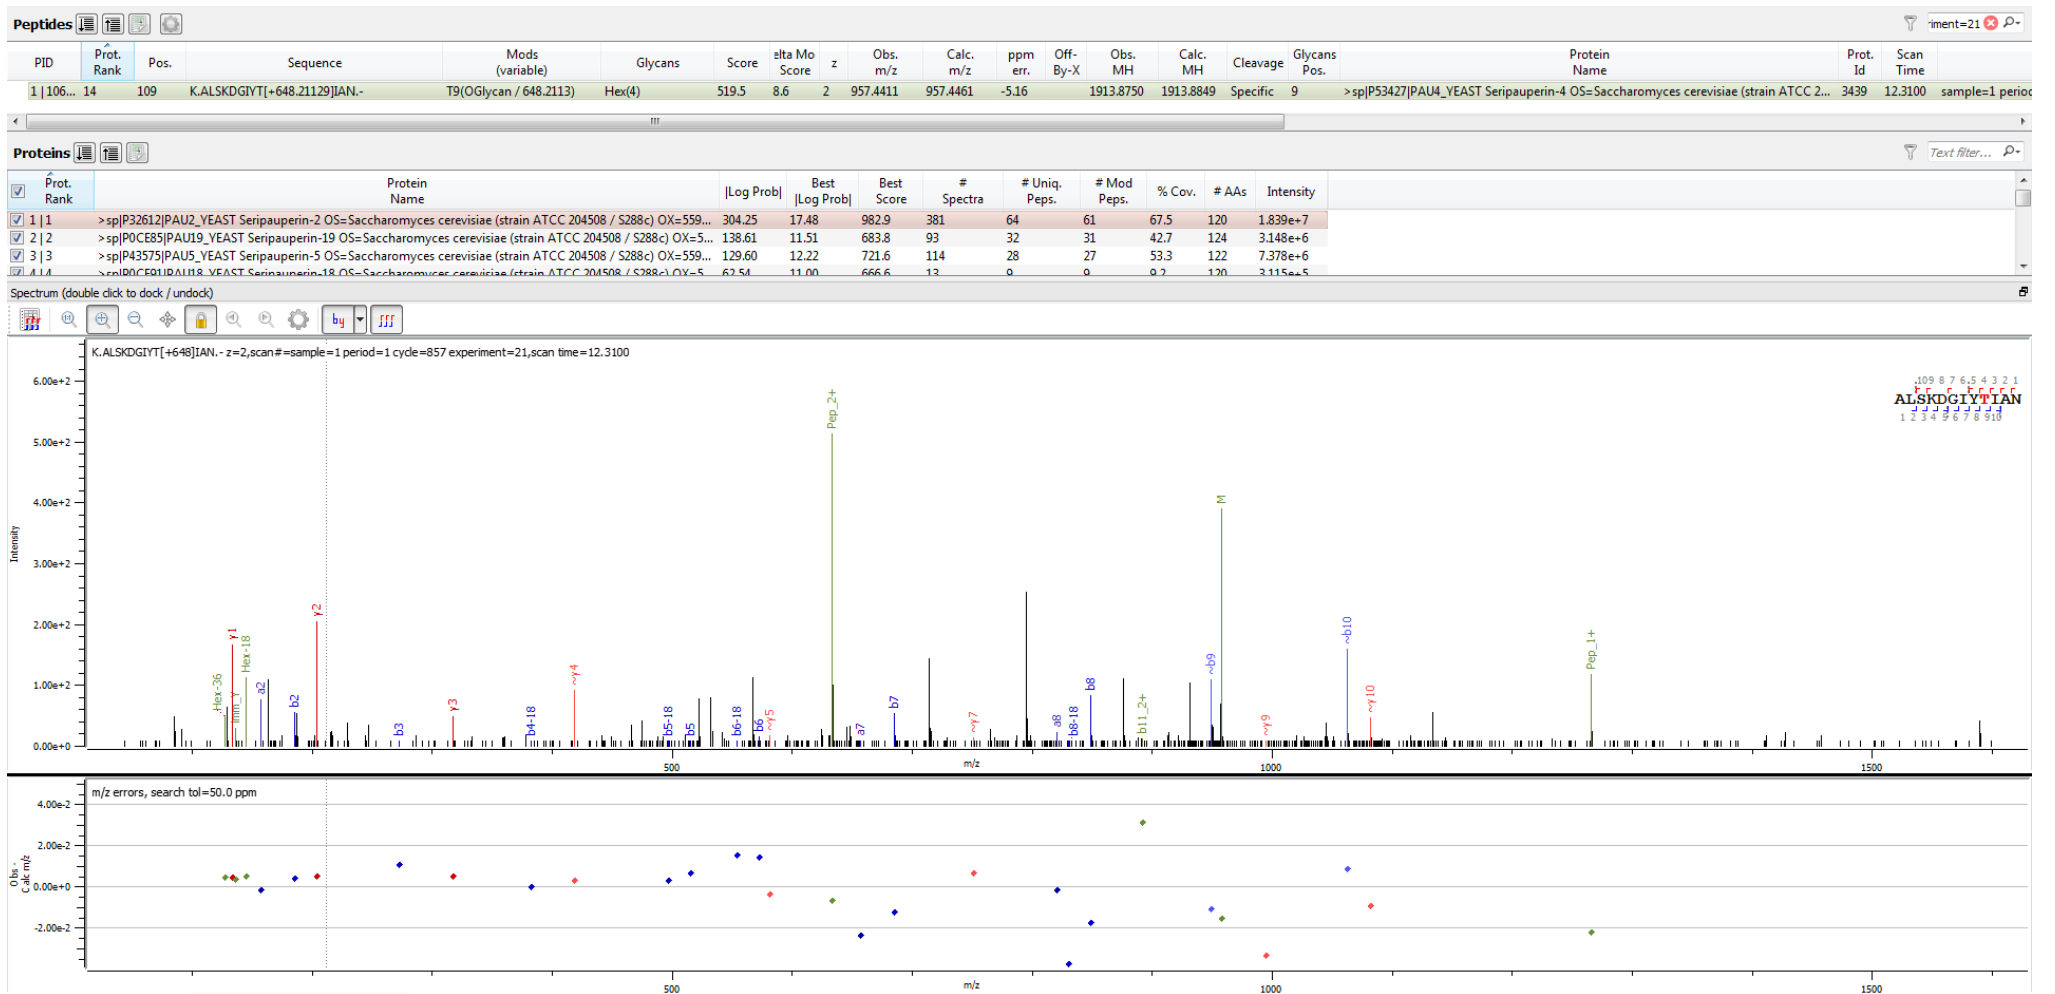



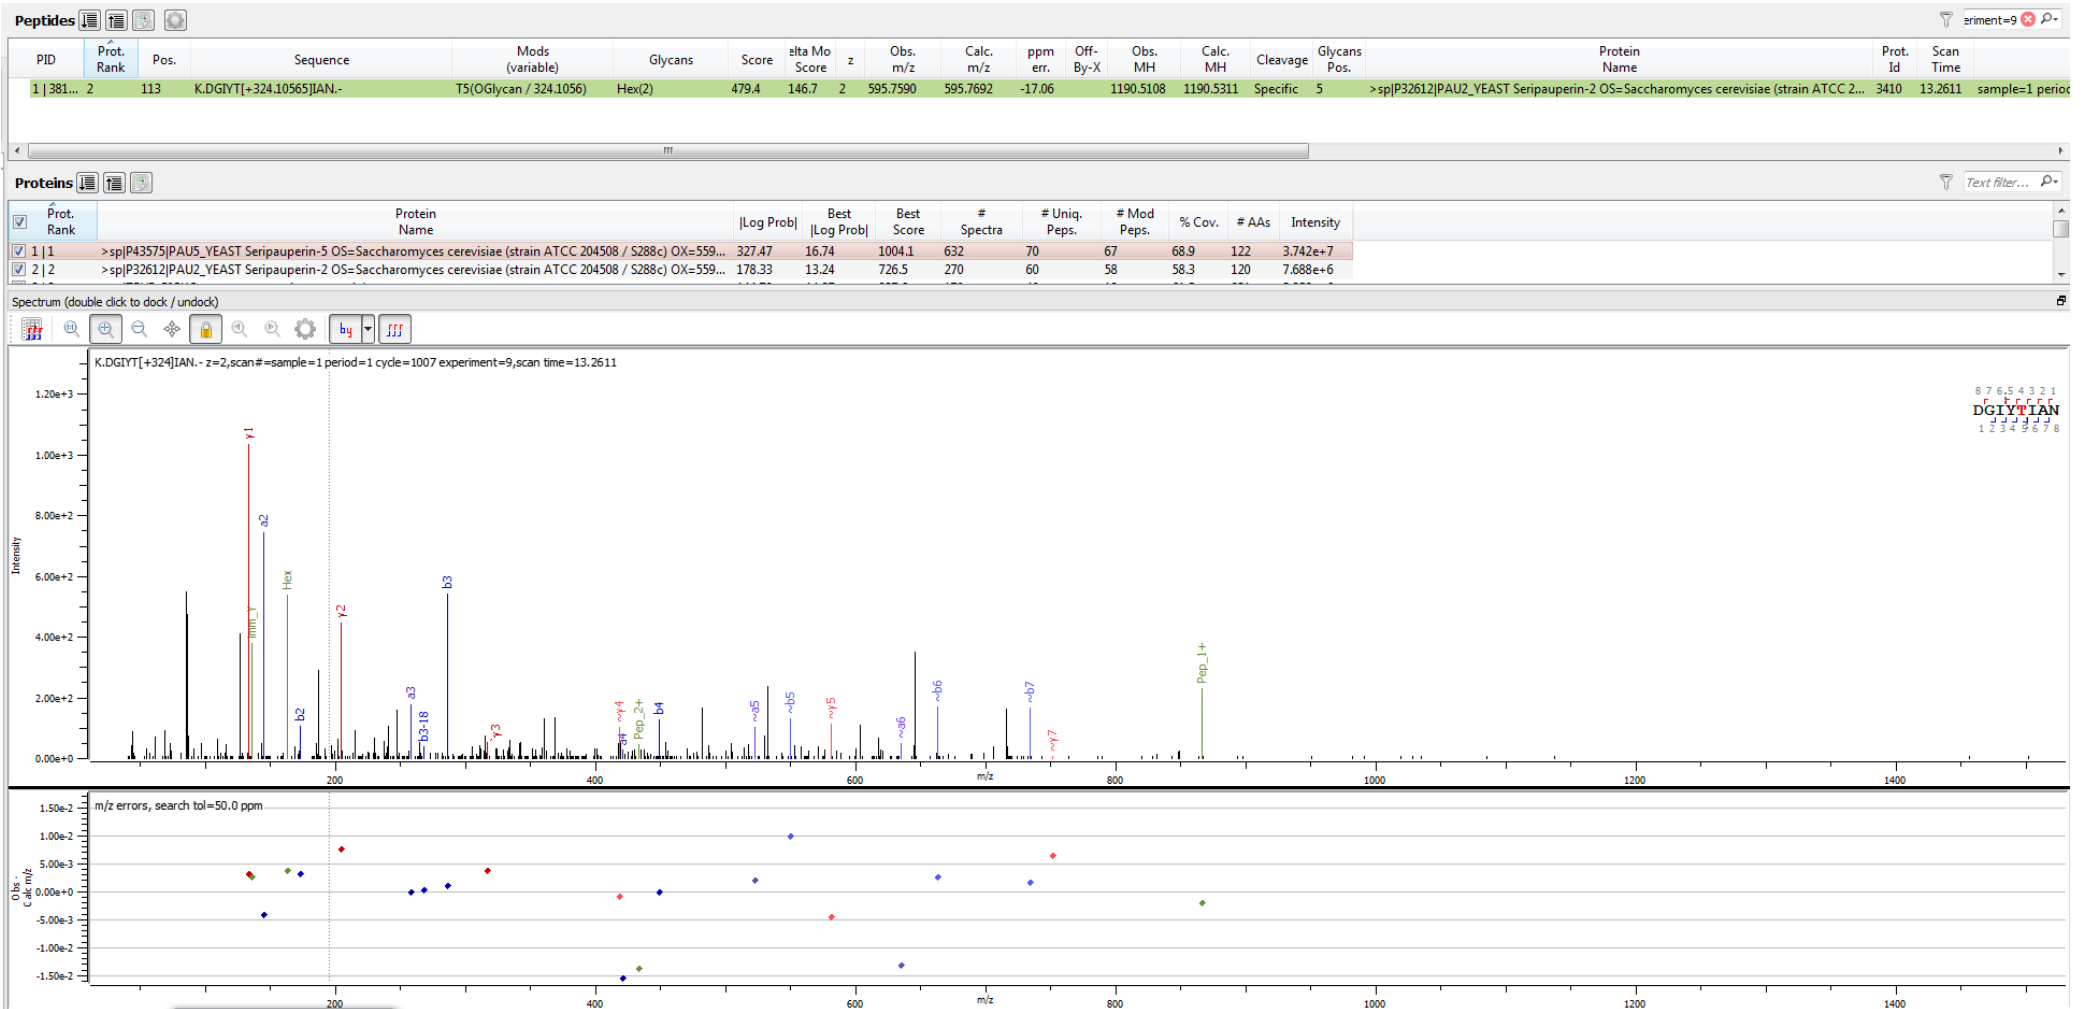

Sample S1 K.DGIYI[+324.106]IAN.-

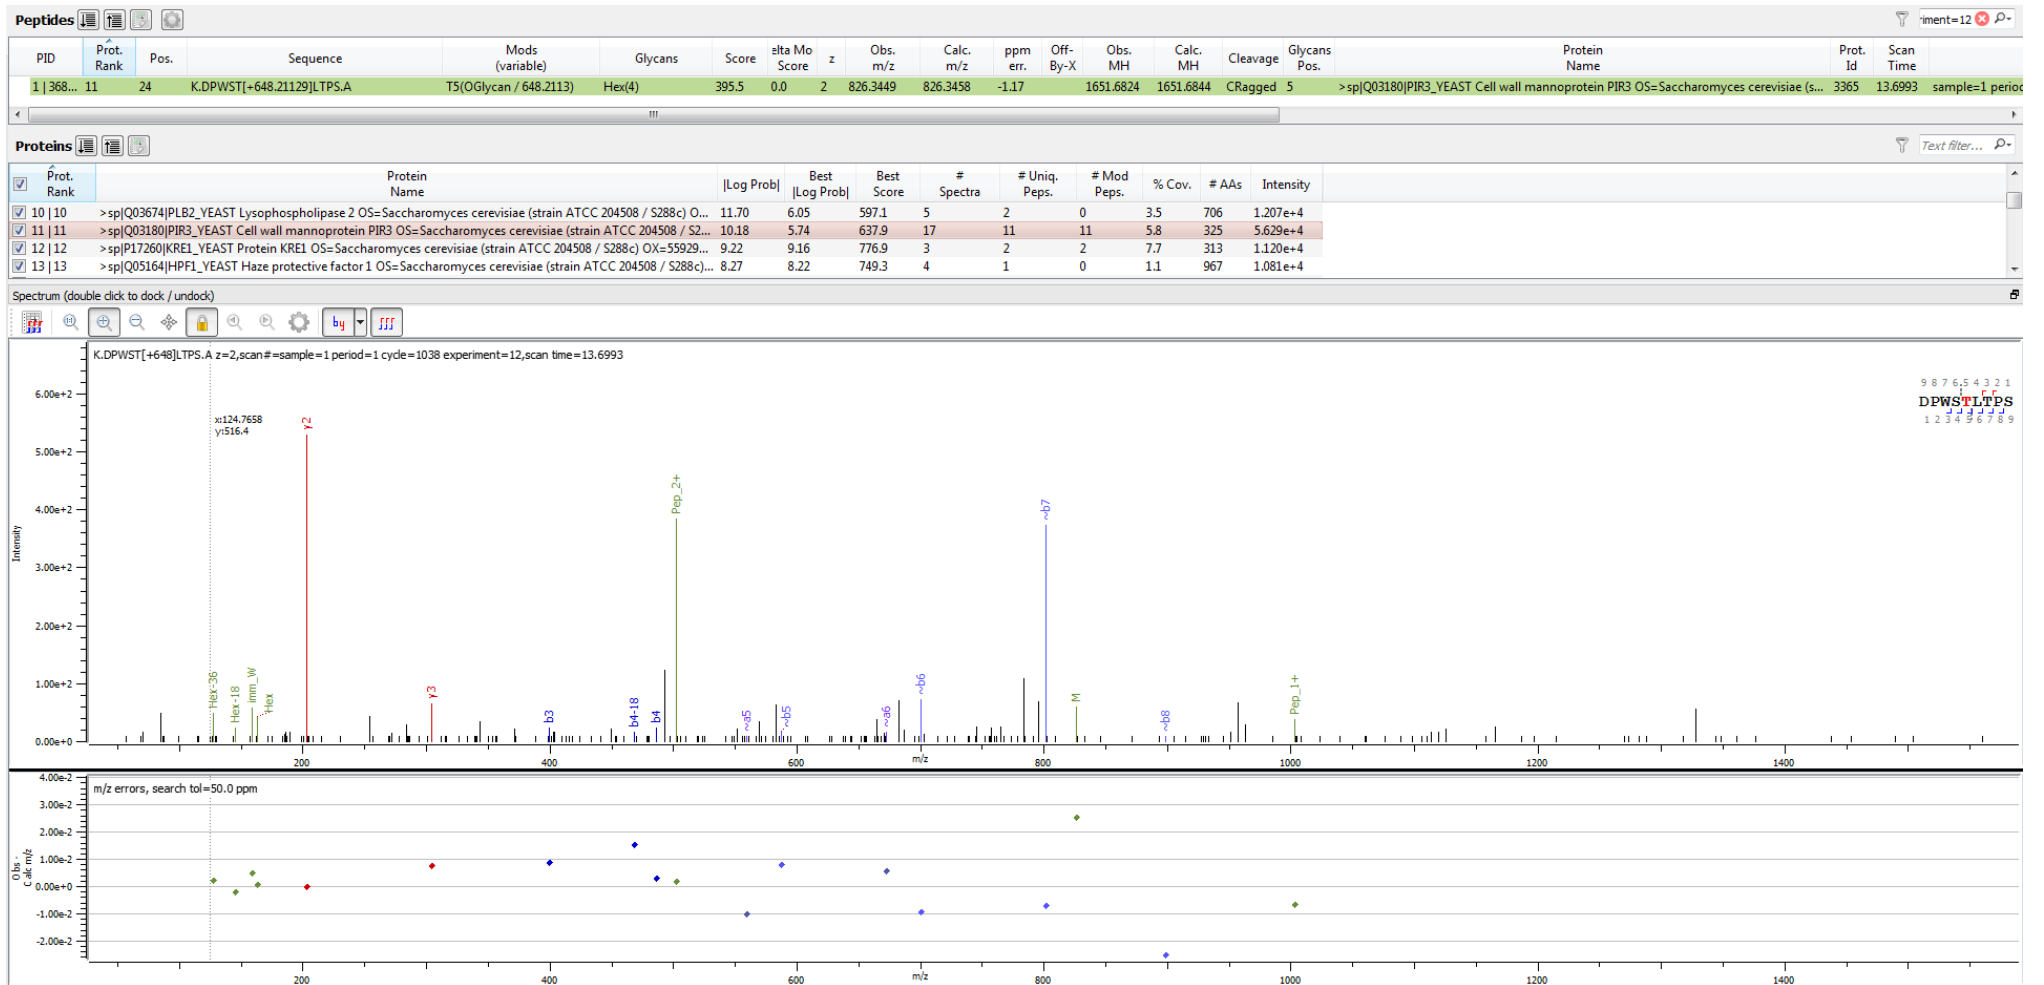

Sample S2 K.DPWST[+648.211]LTPS.A

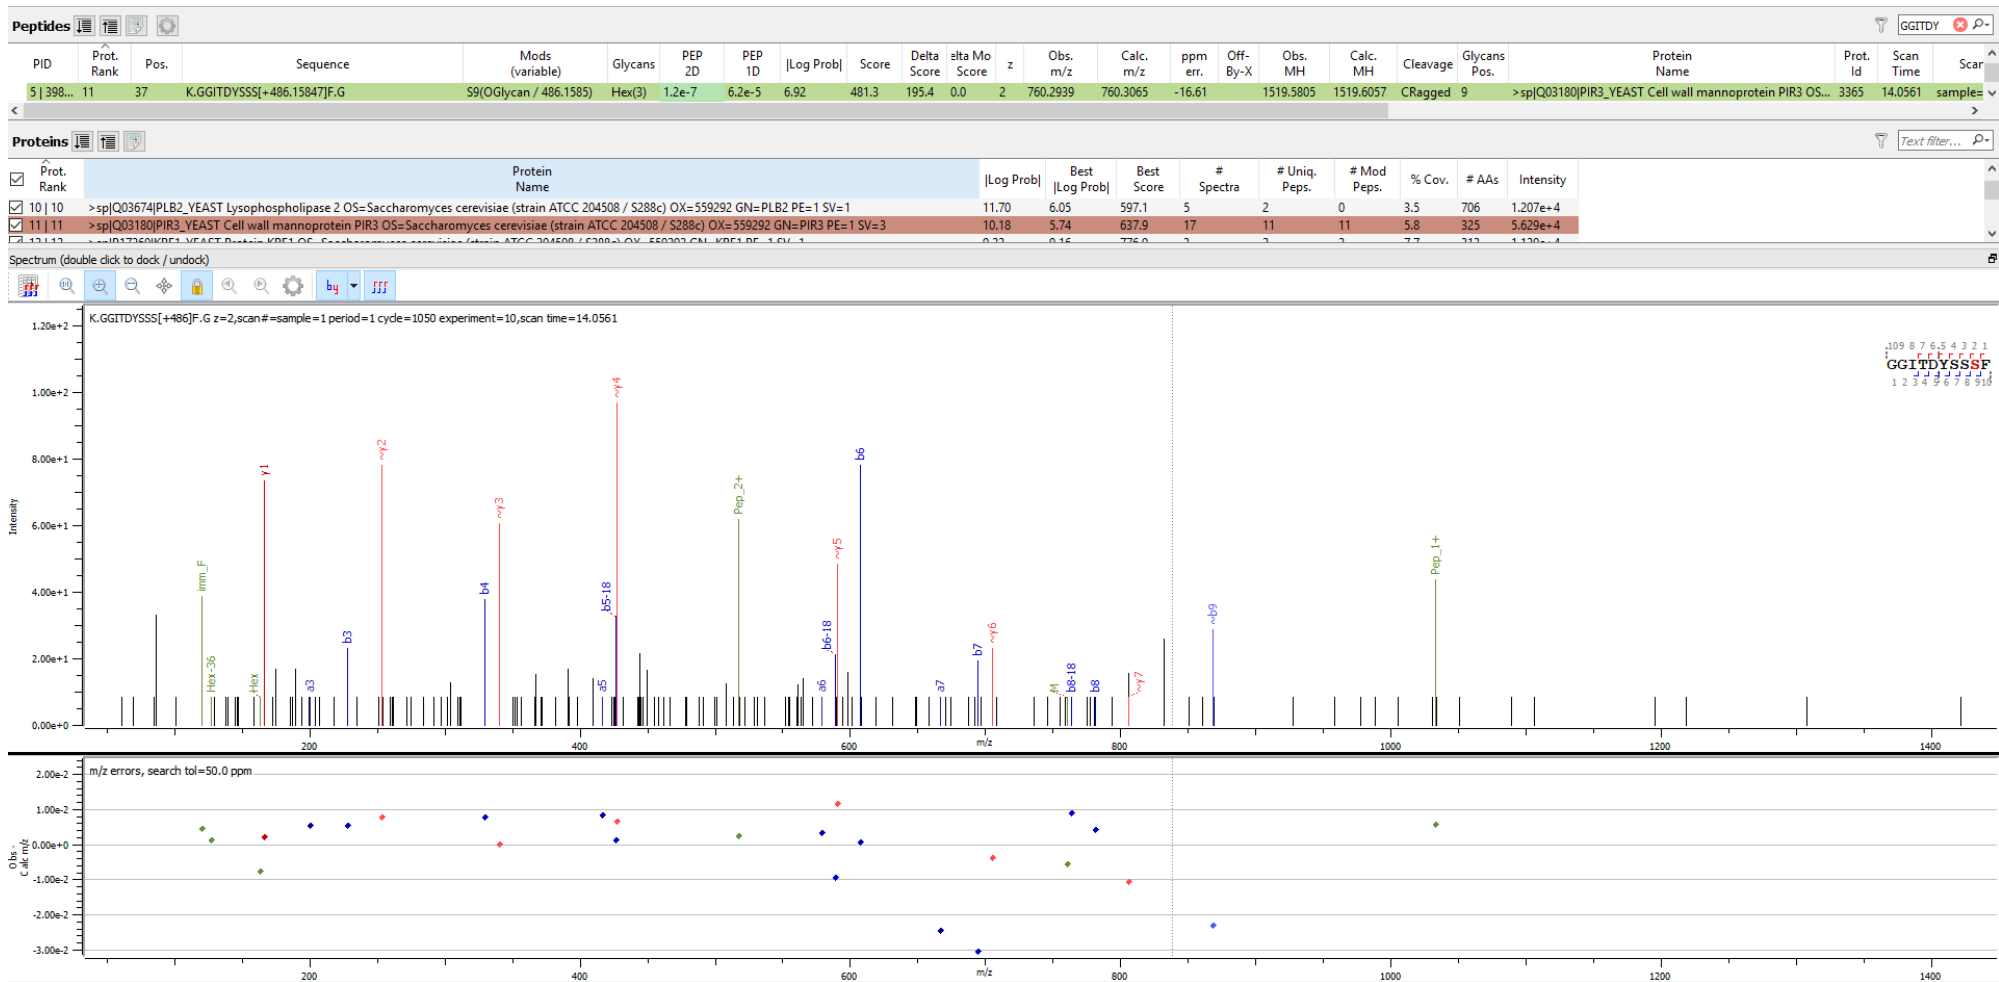

Sample S2 K.GGITDYSSS[+486.158]F.G



| PID | Prot. Rank | Pos. | Sequence | Mods (variable)             | Glycans                 | Score  | alta Mo Score | z   | Obs. m/z | Calc. m/z | ppm err. | Off-By-X | Obs. MH   | Calc. MH  | Cleavage | Glycans Pos. | Protein Name                                                                      | Prot. Id | Scan Time |
|-----|------------|------|----------|-----------------------------|-------------------------|--------|---------------|-----|----------|-----------|----------|----------|-----------|-----------|----------|--------------|-----------------------------------------------------------------------------------|----------|-----------|
| 1   | 464...     | 2    | 94       | R.VITGVPWYST[+324.10565]R.L | T10(O)Glycan / 324.1056 | Hex(2) | 567.4         | 0.0 | 2        | 801.8850  | 801.8985 | -16.88   | 1602.7627 | 1602.7897 | Specific | 10           | >sp Q07987 PAU23_YEAST Seripauperin-23 OS=Saccharomyces cerevisiae (strain ATC... | 3438     | 14.5391   |

| Prot. Rank | Protein Name                                                                                            | [Log Prob] | Best [Log Prob] | Best Score | # Spectra | # Uniq. Peps. | # Mod Peps. | % Cov. | # AAs | Intensity |
|------------|---------------------------------------------------------------------------------------------------------|------------|-----------------|------------|-----------|---------------|-------------|--------|-------|-----------|
| 1   1      | >sp Q3E770 PAU9_YEAST Seripauperin-9 OS=Saccharomyces cerevisiae (strain ATCC 204508 / S288c) OX=559... | 288.60     | 16.66           | 988.6      | 452       | 61            | 56          | 60.8   | 120   | 1.023e+7  |
| 2   2      | >sp Q07987 PAU23_YEAST Seripauperin-23 OS=Saccharomyces cerevisiae (strain ATCC 204508 / S288c) OX=5... | 160.38     | 13.28           | 718.6      | 124       | 39            | 36          | 43.5   | 124   | 2.323e+6  |
| 3   3      | >sp P43575 PAU5_YEAST Seripauperin-5 OS=Saccharomyces cerevisiae (strain ATCC 204508 / S288c) OX=559... | 142.55     | 14.15           | 737.1      | 167       | 35            | 33          | 42.6   | 122   | 6.136e+6  |
| 4   4      | >cn K2C1_HUMAN Common contaminant protein                                                               | 101.54     | 13.43           | 953.1      | 37        | 11            | 0           | 20.4   | 643   | 1.801e+5  |

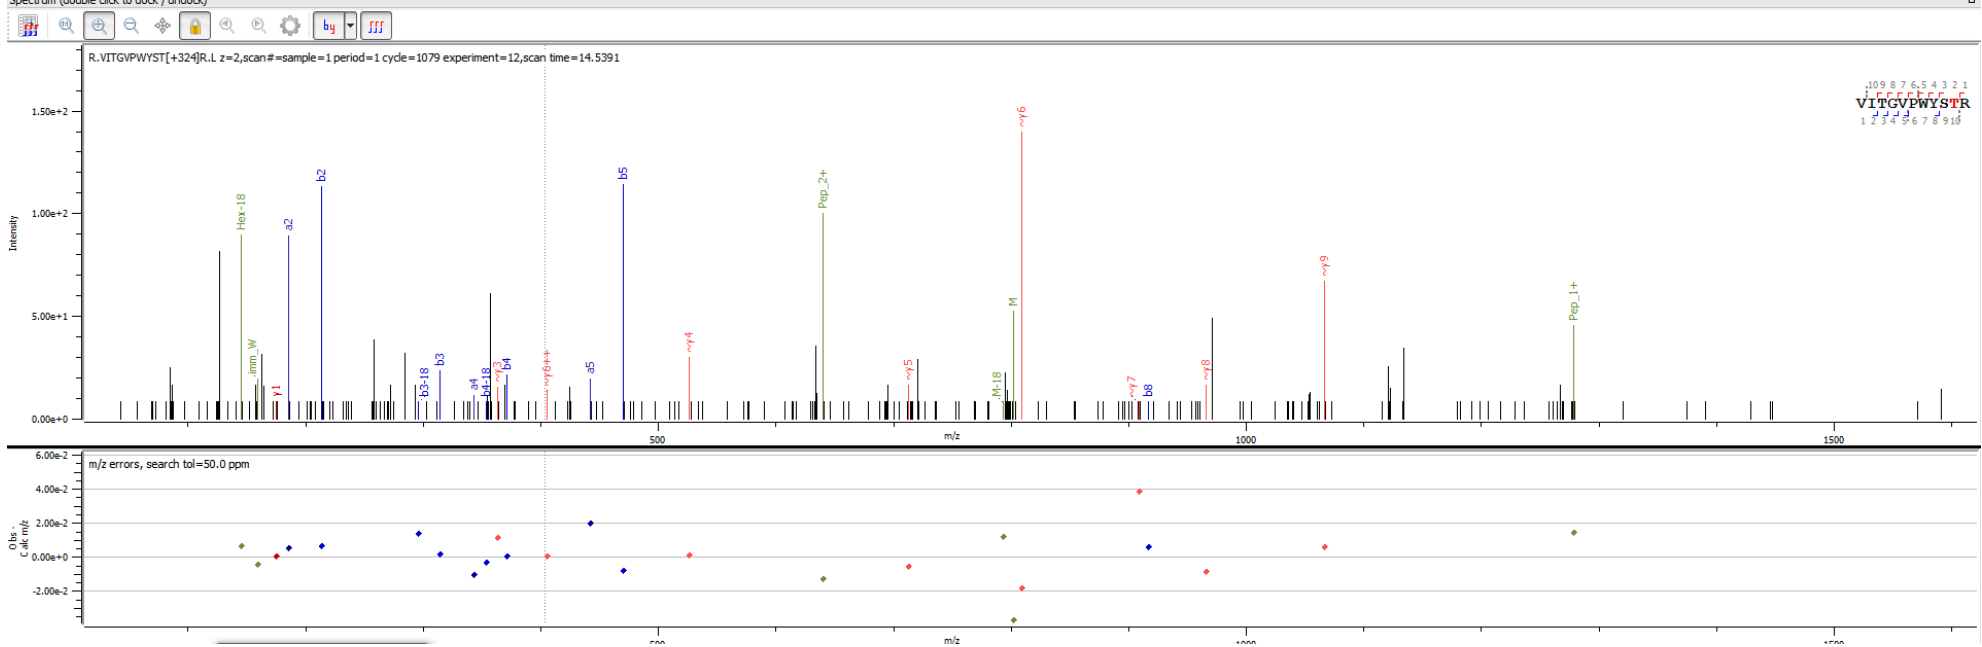

Sample S6 R.VITGVPWYST[+324.106]R.L

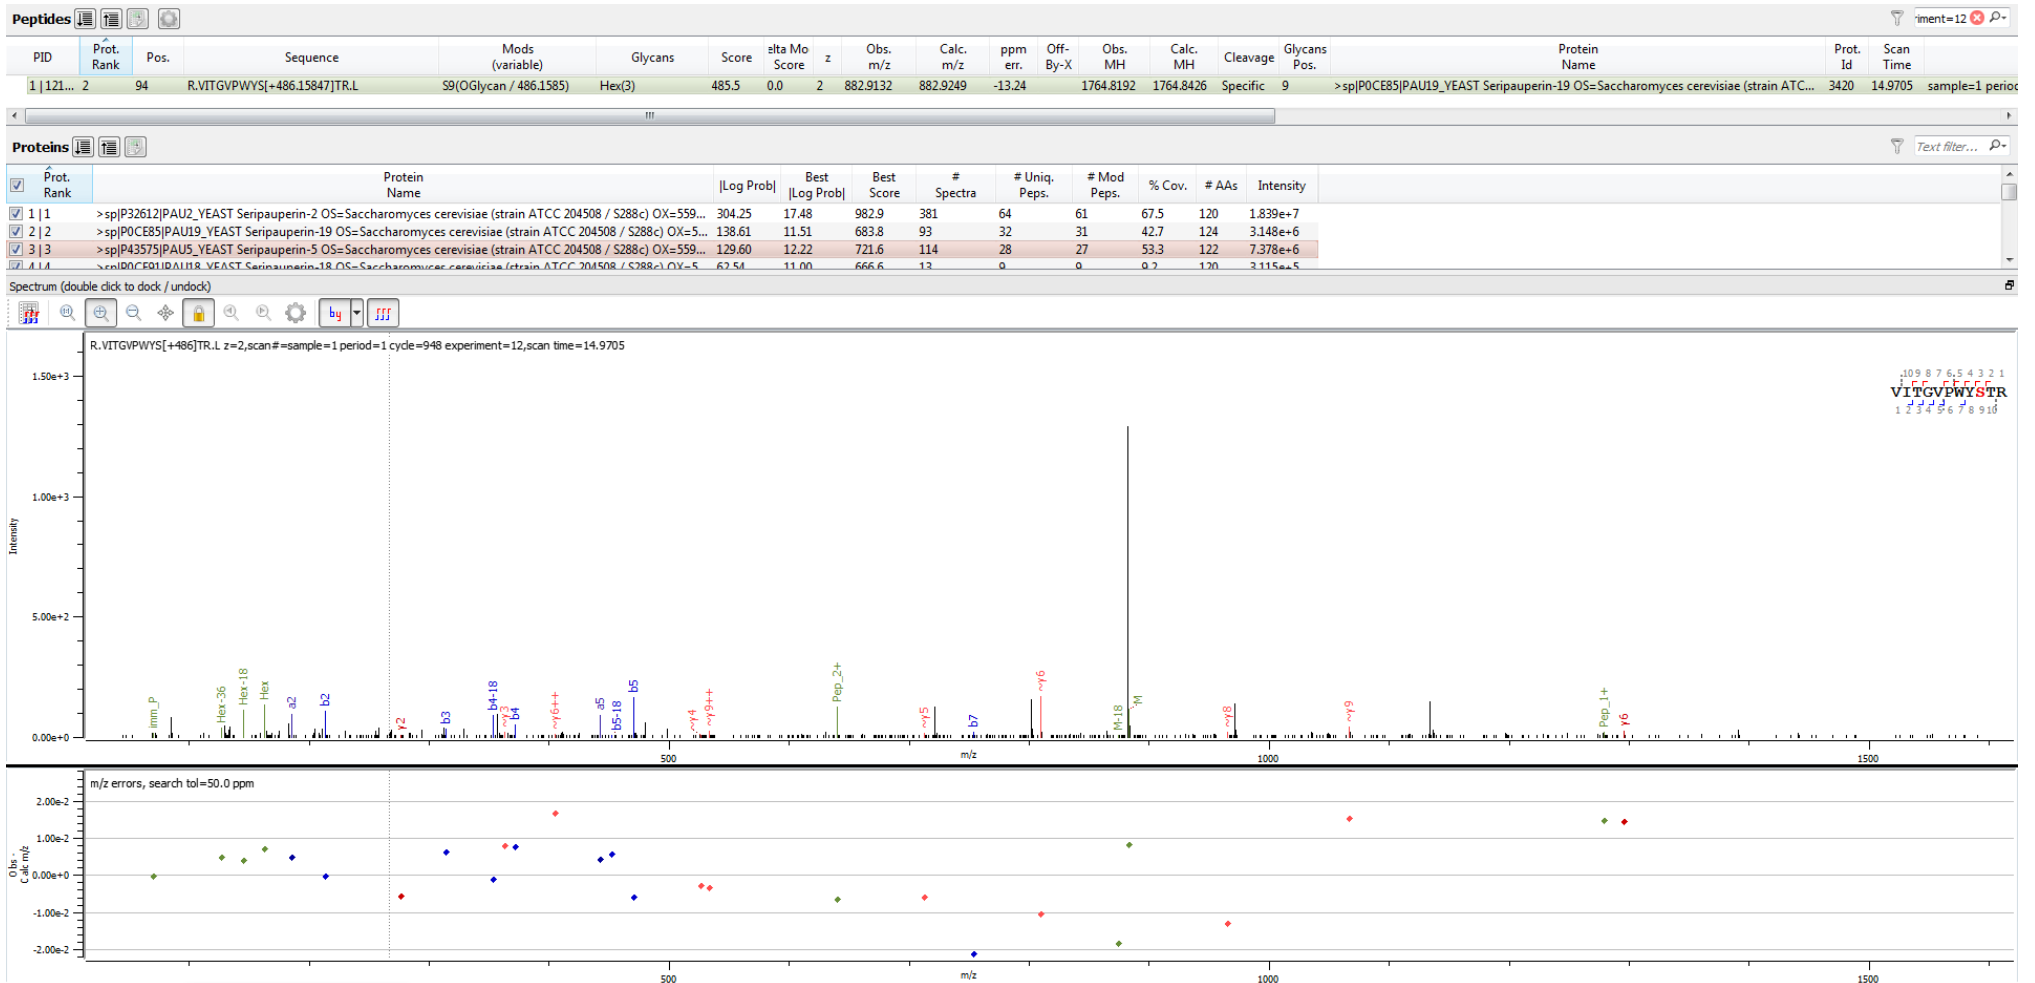

Sample S4 R.VITGVPWYS[+486.158]TR.L

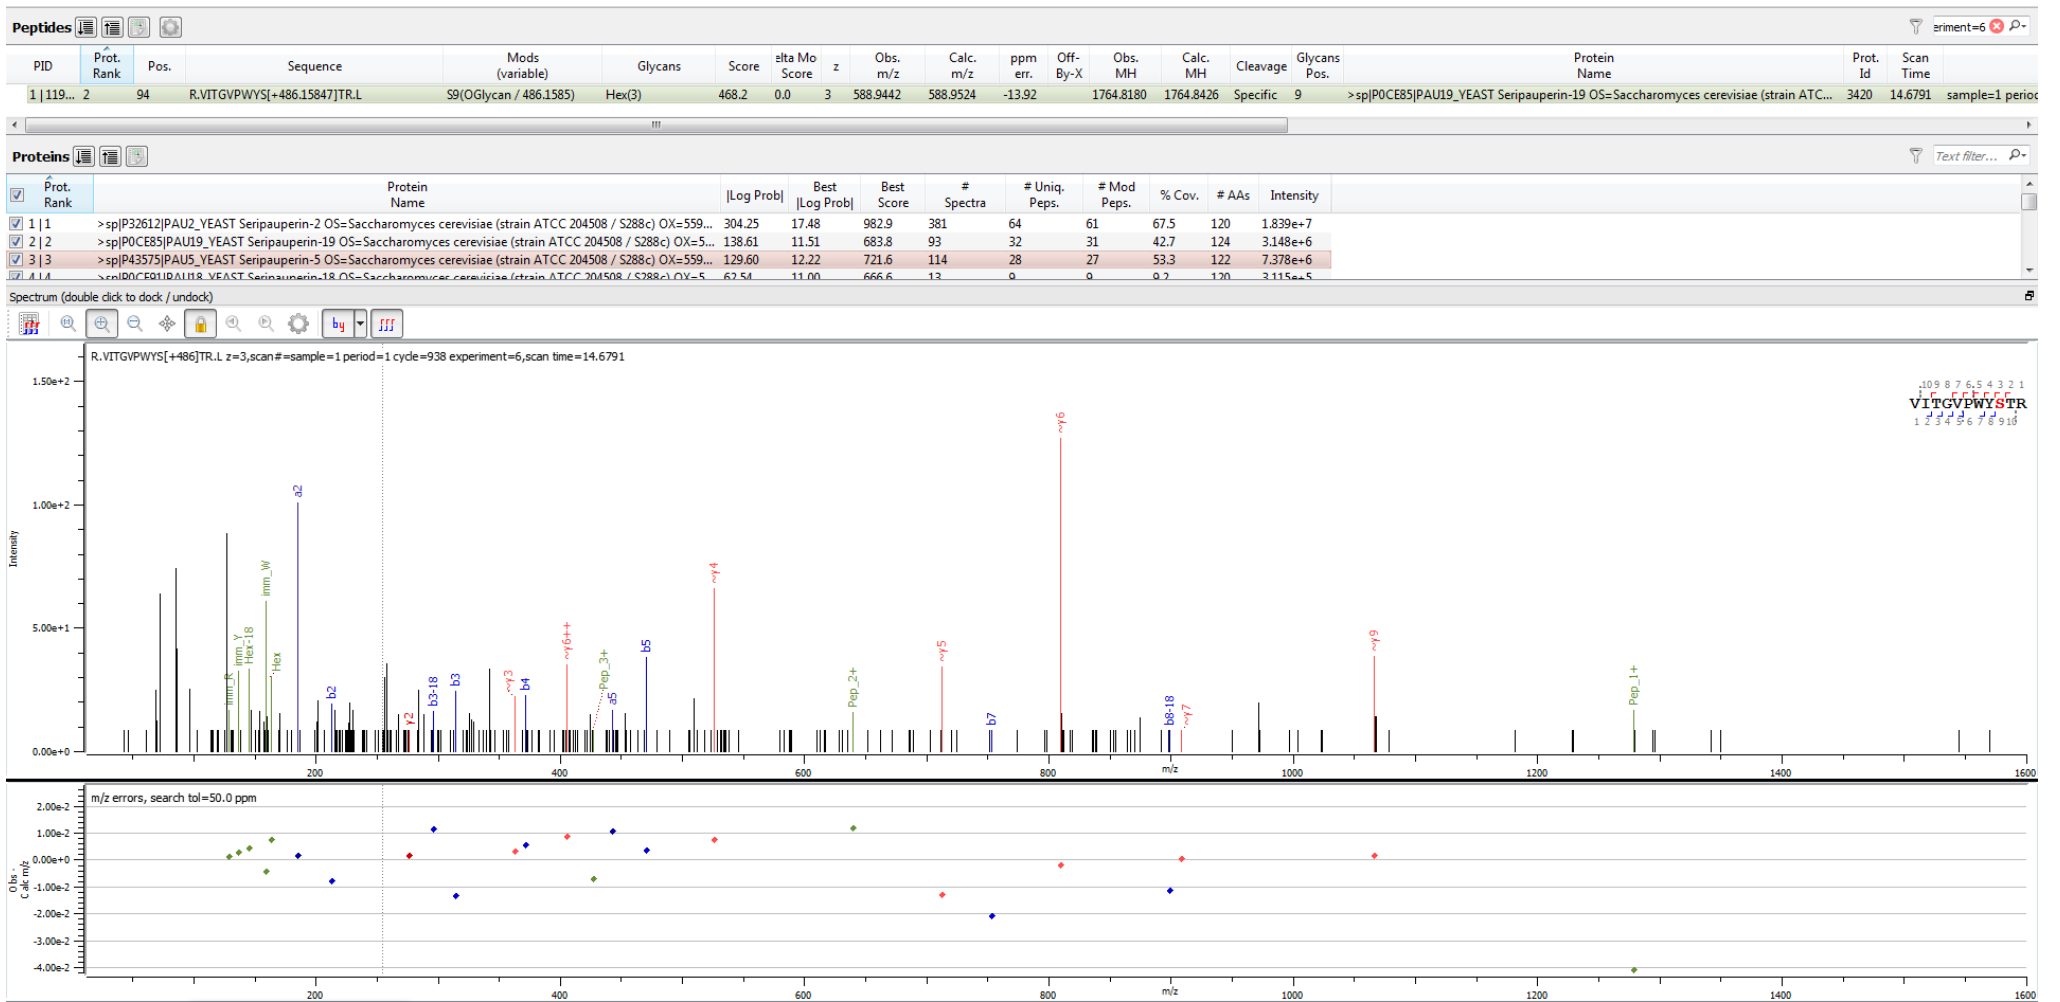

Sample S4 R.VITGVPWYS[+486.158]TR.L

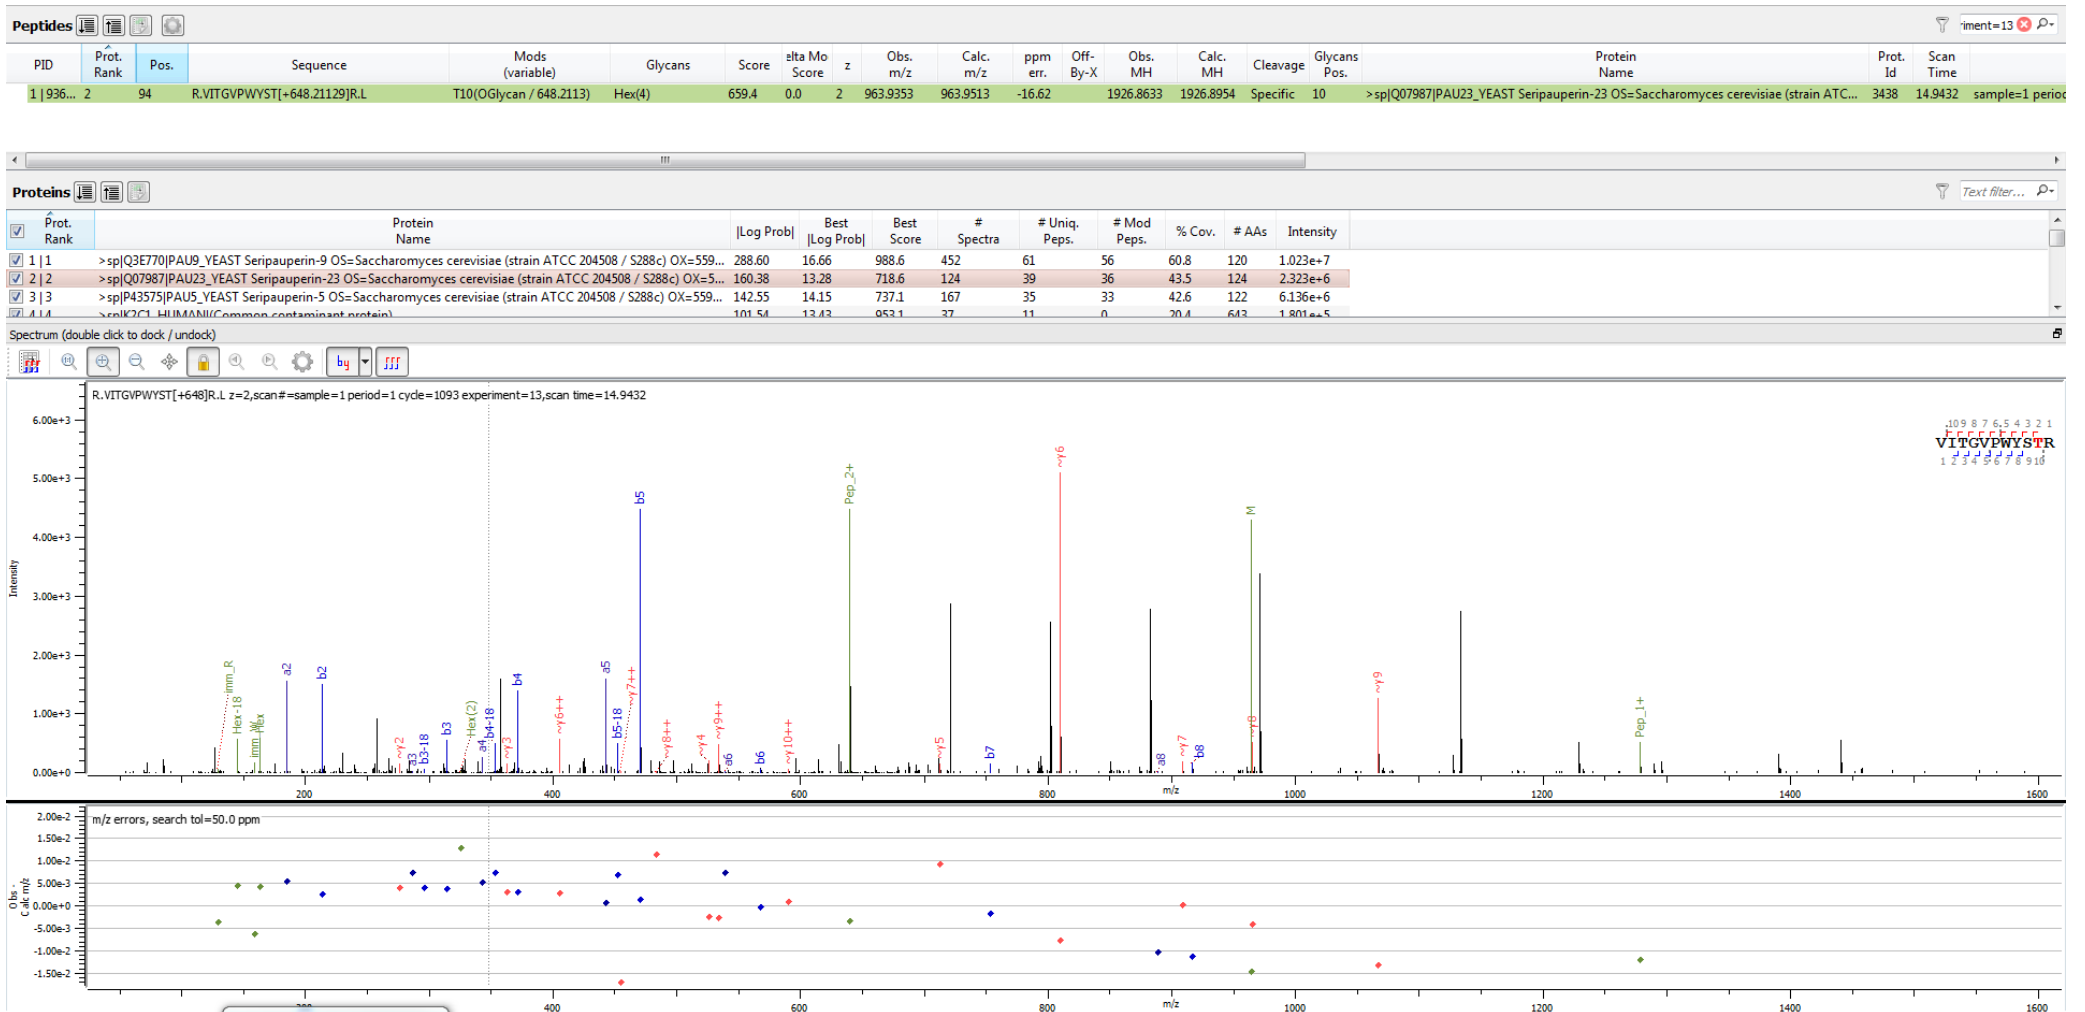

Sample S6 R.VITGVPWYST[+648.211]R.L



| PID | Prot. Rank | Pos. | Sequence                    | Mods (variable)         | Glycans | Score | delta Mo Score | z | Obs. m/z | Calc. m/z | ppm err. | Off-By-X | Obs. MH   | Calc. MH  | Cleavage | Glycans Pos. | Protein Name                                                                      | Prot. Id | Scan Time |
|-----|------------|------|-----------------------------|-------------------------|---------|-------|----------------|---|----------|-----------|----------|----------|-----------|-----------|----------|--------------|-----------------------------------------------------------------------------------|----------|-----------|
| 1   | 115...     | 3    | R.VITGVPWYST[+648.21129]R.L | T10(OGlycan / 648.2113) | Hex(4)  | 594.7 | 0.0            | 3 | 642.9572 | 642.9700  | -19.83   |          | 1926.8572 | 1926.8954 | Specific | 10           | >sp P0CE85 PAU19_YEAST Seripauperin-19 OS=Saccharomyces cerevisiae (strain ATC... | 3420     | 14.4496   |

| Prot. Rank | Protein Name                                                                                            | [Log Prob] | Best [Log Prob] | Best Score | # Spectra | # Uniq. Peps. | # Mod Peps. | % Cov. | # AAs | Intensity |
|------------|---------------------------------------------------------------------------------------------------------|------------|-----------------|------------|-----------|---------------|-------------|--------|-------|-----------|
| 1          | >sp Q3E770 PAU9_YEAST Seripauperin-9 OS=Saccharomyces cerevisiae (strain ATCC 204508 / S288c) OX=559... | 248.32     | 15.68           | 955.8      | 342       | 58            | 55          | 67.5   | 120   | 1.797e+7  |

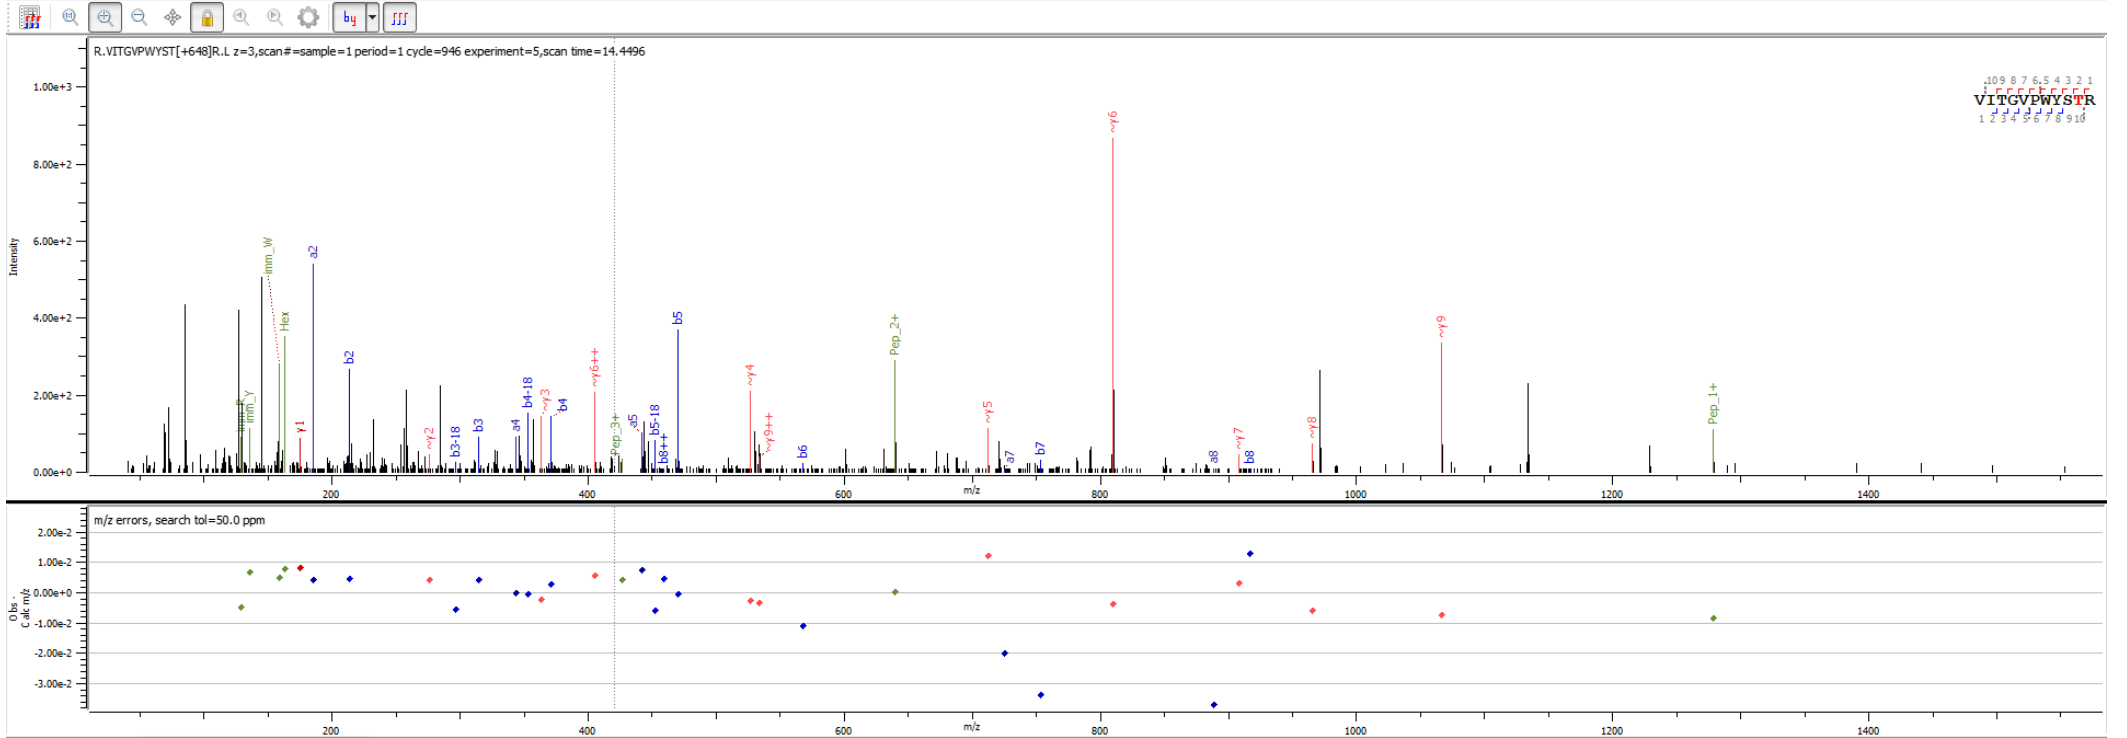

Sample S3 R.VITGVPWYST[+648.211]R.L

Peptides iment=18

| PID        | Prot. Rank | Pos. | Sequence                  | Mods (variable)        | Glycans | Score | delta Mo Score | z | Obs. m/z  | Calc. m/z | ppm err. | Off-By-X | Obs. MH   | Calc. MH  | Cleavage | Glycans Pos. | Protein Name                                                                      | Prot. Id | Scan Time |                 |
|------------|------------|------|---------------------------|------------------------|---------|-------|----------------|---|-----------|-----------|----------|----------|-----------|-----------|----------|--------------|-----------------------------------------------------------------------------------|----------|-----------|-----------------|
| 1   108... | 4          | 94   | R.VITGVPWYS[+810.264]TR.L | S9(O)Glycan / 810.2641 | Hex(5)  | 647.2 | 1.2            | 2 | 1044.9594 | 1044.9777 | -17.60   |          | 2088.9114 | 2088.9482 | Specific | 9            | >sp Q07987 PAU23_YEAST Seripauperin-23 OS=Saccharomyces cerevisiae (strain ATC... | 3438     | 14.6709   | sample=1 period |

Proteins Text filter...

| Prot. Rank | Protein Name                                                                                            | [Log Prob] | Best [Log Prob] | Best Score | # Spectra | # Uniq. Peps. | # Mod Peps. | % Cov. | # AAs | Intensity |
|------------|---------------------------------------------------------------------------------------------------------|------------|-----------------|------------|-----------|---------------|-------------|--------|-------|-----------|
| 1   1      | >sp P43575 PAU5_YEAST Seripauperin-5 OS=Saccharomyces cerevisiae (strain ATCC 204508 / S288c) OX=559... | 327.47     | 16.74           | 1004.1     | 632       | 70            | 67          | 68.9   | 122   | 3.742e+7  |
| 2   2      | >sp P32612 PAU2_YEAST Seripauperin-2 OS=Saccharomyces cerevisiae (strain ATCC 204508 / S288c) OX=559... | 178.33     | 13.24           | 726.5      | 270       | 60            | 58          | 58.3   | 120   | 7.688e+6  |

Spectrum (double click to dock / undock)

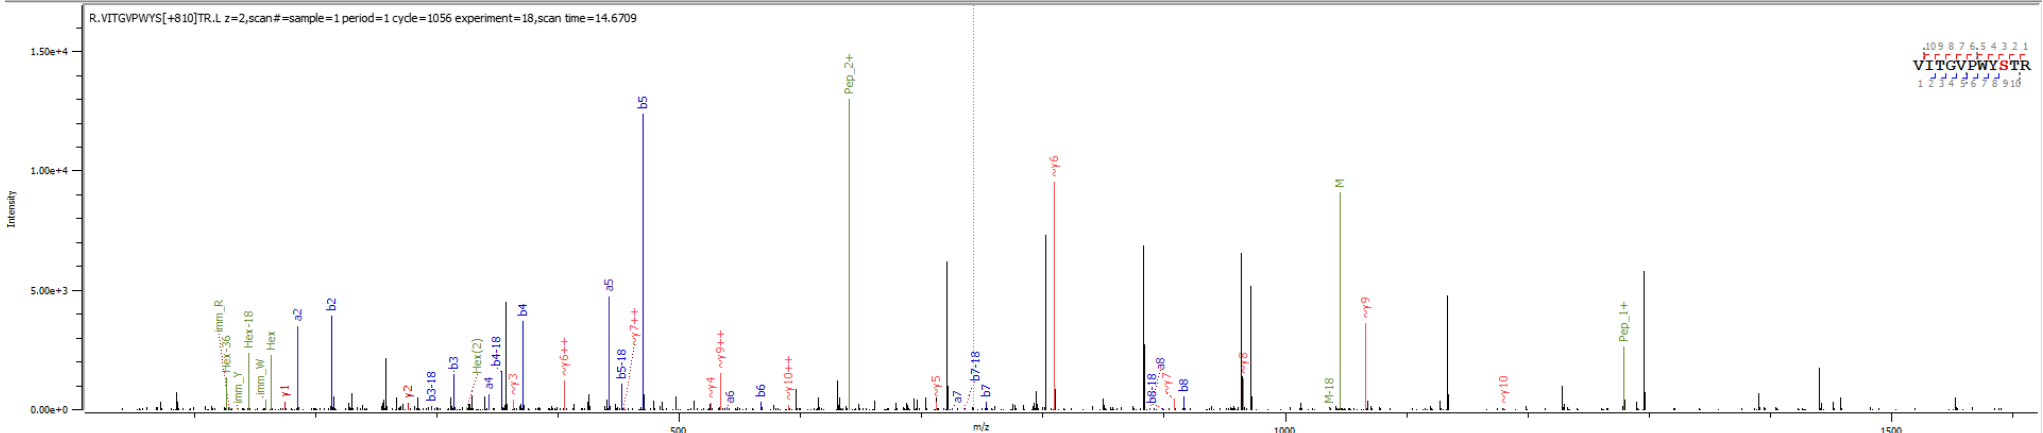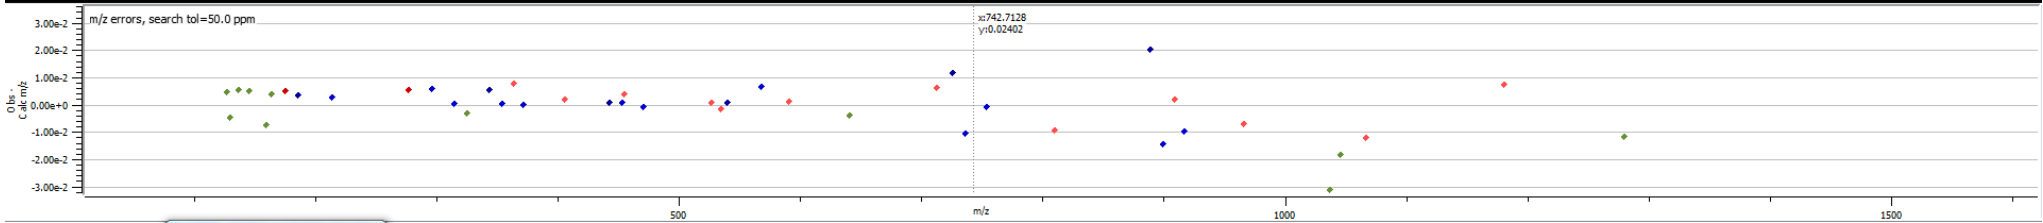

Sample S1 R.VITGVPWYS[+810.264]TR.L

| PID      | Prot. Rank | Pos. | Sequence                  | Mods (variable)        | Glycans | Score | delta Mo Score | z | Obs. m/z | Calc. m/z | ppm err. | Off-By-X | Obs. MH   | Calc. MH  | Cleavage | Glycans Pos. | Protein Name                                                                       | Prot. Id | Scan Time |
|----------|------------|------|---------------------------|------------------------|---------|-------|----------------|---|----------|-----------|----------|----------|-----------|-----------|----------|--------------|------------------------------------------------------------------------------------|----------|-----------|
| 1 927... | 2          | 94   | R.VITGVPWYS[+810.264]TR.L | S9(Oglycan / 810.2641) | Hex(5)  | 711.5 | 1.2            | 3 | 696.9746 | 696.9876  | -18.69   |          | 2088.9092 | 2088.9482 | Specific | 9            | >sp Q07987 PAU23_YEAST Seripauperin-23 OS=Saccharomyces cerevisiae (strain ATCC... | 3438     | 14.8259   |

| Prot. Rank | Protein Name                                                                                            | [Log Prob] | Best [Log Prob] | Best Score | # Spectra | # Uniq. Peps. | # Mod Peps. | % Cov. | # AAs | Intensity |
|------------|---------------------------------------------------------------------------------------------------------|------------|-----------------|------------|-----------|---------------|-------------|--------|-------|-----------|
| 1 1        | >sp Q3E770 PAU9_YEAST Seripauperin-9 OS=Saccharomyces cerevisiae (strain ATCC 204508 / S288c) OX=559... | 288.60     | 16.66           | 988.6      | 452       | 61            | 56          | 60.8   | 120   | 1.023e+7  |
| 2 2        | >sp Q07987 PAU23_YEAST Seripauperin-23 OS=Saccharomyces cerevisiae (strain ATCC 204508 / S288c) OX=5... | 160.38     | 13.28           | 718.6      | 124       | 39            | 36          | 43.5   | 124   | 2.323e+6  |
| 3 3        | >sp P43575 PAU5_YEAST Seripauperin-5 OS=Saccharomyces cerevisiae (strain ATCC 204508 / S288c) OX=559... | 142.55     | 14.15           | 737.1      | 167       | 35            | 33          | 42.6   | 122   | 6.136e+6  |
| 4 4        | >sp K2C1_HUMAN C1 (Common contaminant protein)                                                          | 101.54     | 13.43           | 953.1      | 37        | 11            | 0           | 20.4   | 643   | 1.801e+5  |

Spectrum (double click to dock / undock)

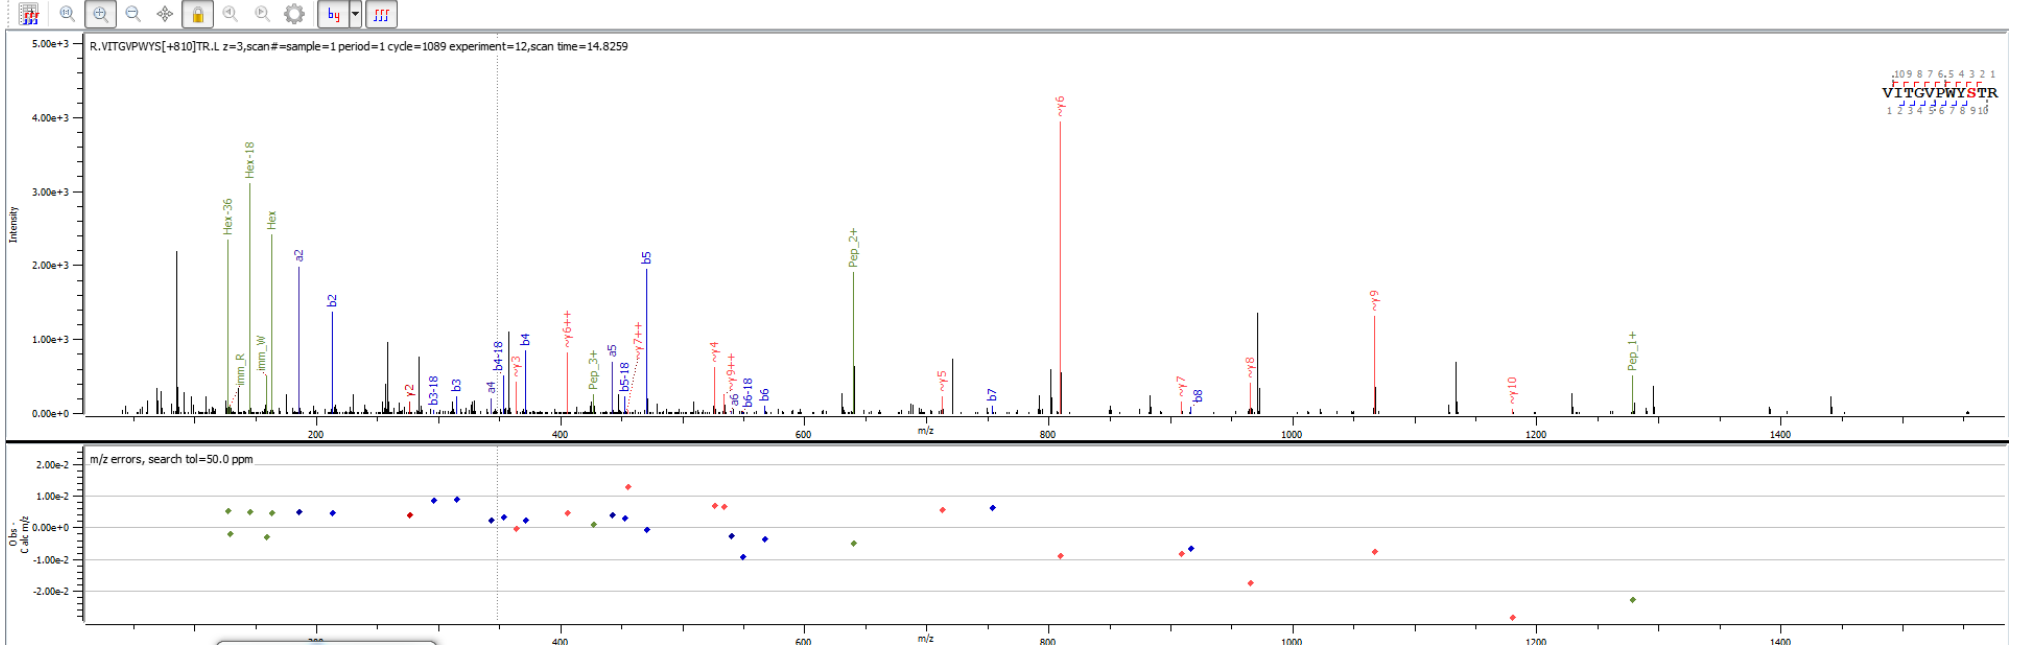

Sample S6 R.VITGVPWYS[+810.264]TR.L

| PID | Prot. Rank | Pos. | Sequence | Mods (variable)             | Glycans                | Score  | delta Mo Score | z   | Obs. m/z | Calc. m/z | ppm err.  | Off-By-X | Obs. MH   | Calc. MH  | Cleavage | Glycans Pos. | Protein Name                                                                      | Prot. Id | Scan Time |                 |
|-----|------------|------|----------|-----------------------------|------------------------|--------|----------------|-----|----------|-----------|-----------|----------|-----------|-----------|----------|--------------|-----------------------------------------------------------------------------------|----------|-----------|-----------------|
| 1   | 187...     | 2    | 94       | R.VITGVPWYS[+972.31694]TR.L | S9(OGlycan / 972.3169) | Hex(6) | 622.4          | 1.2 | 2        | 1125.9857 | 1126.0041 | -16.40   | 2250.9641 | 2251.0010 | Specific | 9            | >sp P0CE85 PAU19_YEAST Seripauperin-19 OS=Saccharomyces cerevisiae (strain ATC... | 3420     | 14.3431   | sample=1 period |

| Prot. Rank | Protein Name | [Log Prob]                                                                                              | Best [Log Prob] | Best Score | # Spectra | # Uniq. Peps. | # Mod Peps. | % Cov. | # AAs | Intensity |          |
|------------|--------------|---------------------------------------------------------------------------------------------------------|-----------------|------------|-----------|---------------|-------------|--------|-------|-----------|----------|
| 1          | 1            | >sp P32612 PAU2_YEAST Seripauperin-2 OS=Saccharomyces cerevisiae (strain ATCC 204508 / S288c) OX=559... | 304.25          | 17.48      | 982.9     | 381           | 64          | 61     | 67.5  | 120       | 1.839e+7 |
| 2          | 2            | >sp P0CE85 PAU19_YEAST Seripauperin-19 OS=Saccharomyces cerevisiae (strain ATCC 204508 / S288c) OX=5... | 138.61          | 11.51      | 683.8     | 93            | 32          | 31     | 42.7  | 124       | 3.148e+6 |
| 3          | 3            | >sp P43575 PAU5_YEAST Seripauperin-5 OS=Saccharomyces cerevisiae (strain ATCC 204508 / S288c) OX=559... | 129.60          | 12.22      | 721.6     | 114           | 28          | 27     | 53.3  | 122       | 7.378e+6 |
| 4          | 4            | >sp P0CE85 PAU19_YEAST Seripauperin-19 OS=Saccharomyces cerevisiae (strain ATCC 204508 / S288c) OX=5... | 62.54           | 11.00      | 666.6     | 13            | 0           | 0      | 0.2   | 120       | 3.115e+5 |

Spectrum (double click to dock / undock)

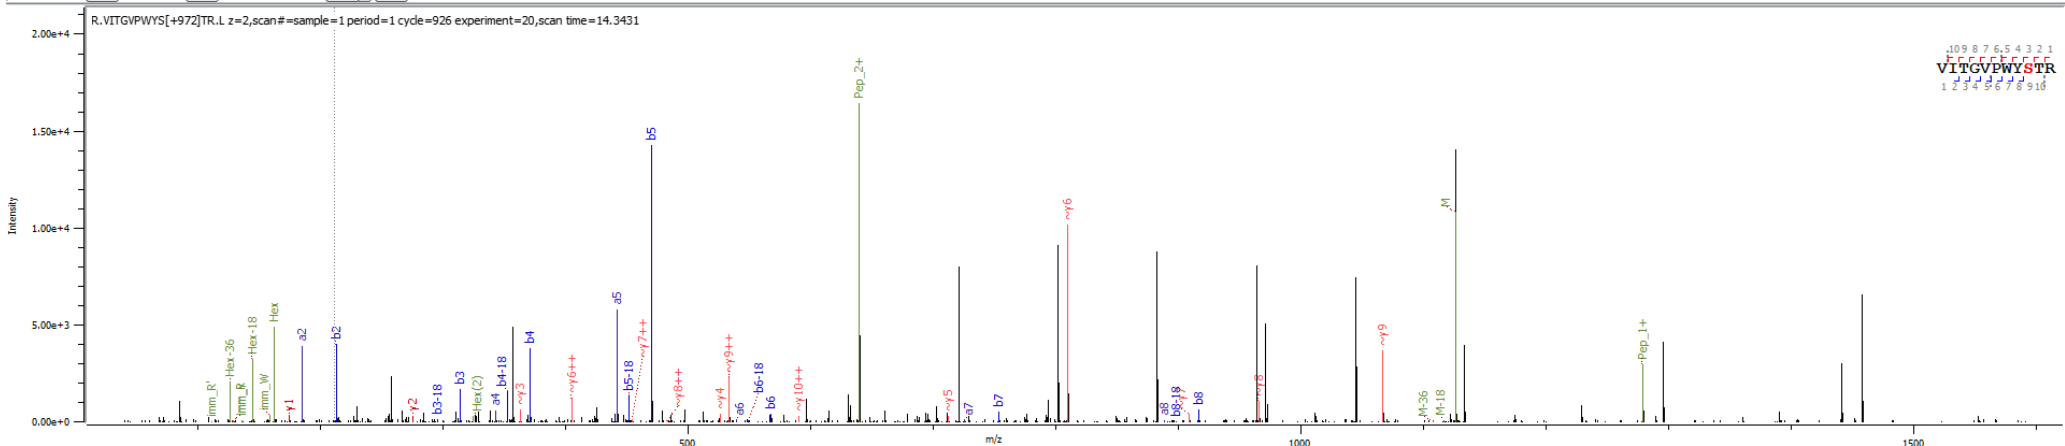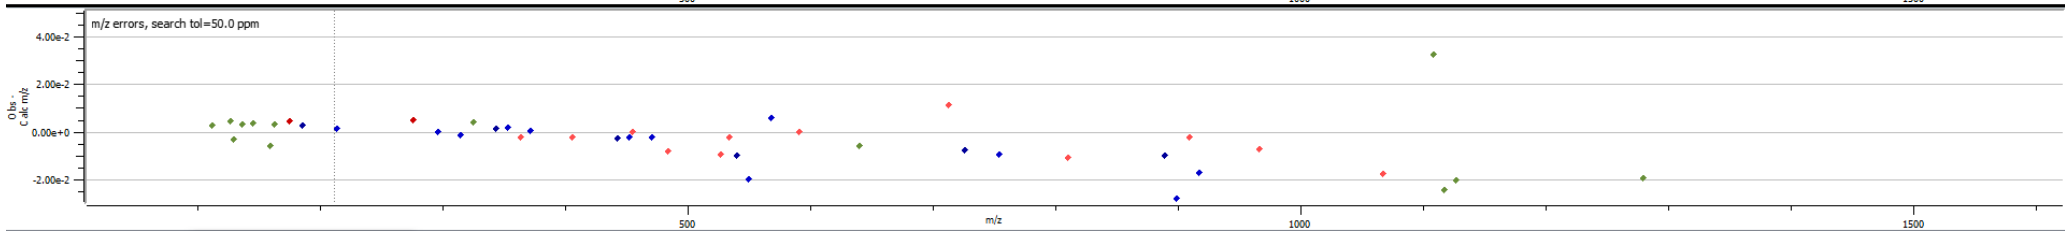

Sample S4 R.VITGVPWYS[+972.317]TR.L

| PID | Prot. Rank | Pos. | Sequence | Mods (variable)             | Glycans                | Score  | delta Mo Score | z   | Obs. m/z | Calc. m/z | ppm err. | Off-By-X | Obs. MH   | Calc. MH  | Cleavage | Glycans Pos. | Protein Name                                                                       | Prot. Id | Scan Time |
|-----|------------|------|----------|-----------------------------|------------------------|--------|----------------|-----|----------|-----------|----------|----------|-----------|-----------|----------|--------------|------------------------------------------------------------------------------------|----------|-----------|
| 1   | 131...     | 2    | 94       | R.VITGVPWYS[+972.31694]TR.L | S9(OGlycan / 972.3169) | Hex(6) | 699.7          | 1.2 | 3        | 750.9908  | 751.0052 | -19.20   | 2250.9578 | 2251.0010 | Specific | 9            | >sp Q07987 PAU23_YEAST Seripauperin-23 OS=Saccharomyces cerevisiae (strain ATCC... | 3438     | 14.6208   |

| Prot. Rank | Protein Name                                                                                            | [Log Prob] | Best [Log Prob] | Best Score | # Spectra | # Uniq. Peps. | # Mod Peps. | % Cov. | # AAs | Intensity |
|------------|---------------------------------------------------------------------------------------------------------|------------|-----------------|------------|-----------|---------------|-------------|--------|-------|-----------|
| 1          | >sp Q3E770 PAU9_YEAST Seripauperin-9 OS=Saccharomyces cerevisiae (strain ATCC 204508 / S288c) OX=559... | 288.60     | 16.66           | 988.6      | 452       | 61            | 56          | 60.8   | 120   | 1.023e+7  |
| 2          | >sp Q07987 PAU23_YEAST Seripauperin-23 OS=Saccharomyces cerevisiae (strain ATCC 204508 / S288c) OX=5... | 160.38     | 13.28           | 718.6      | 124       | 39            | 36          | 43.5   | 124   | 2.323e+6  |
| 3          | >sp P43575 PAU5_YEAST Seripauperin-5 OS=Saccharomyces cerevisiae (strain ATCC 204508 / S288c) OX=559... | 142.55     | 14.15           | 737.1      | 167       | 35            | 33          | 42.6   | 122   | 6.136e+6  |

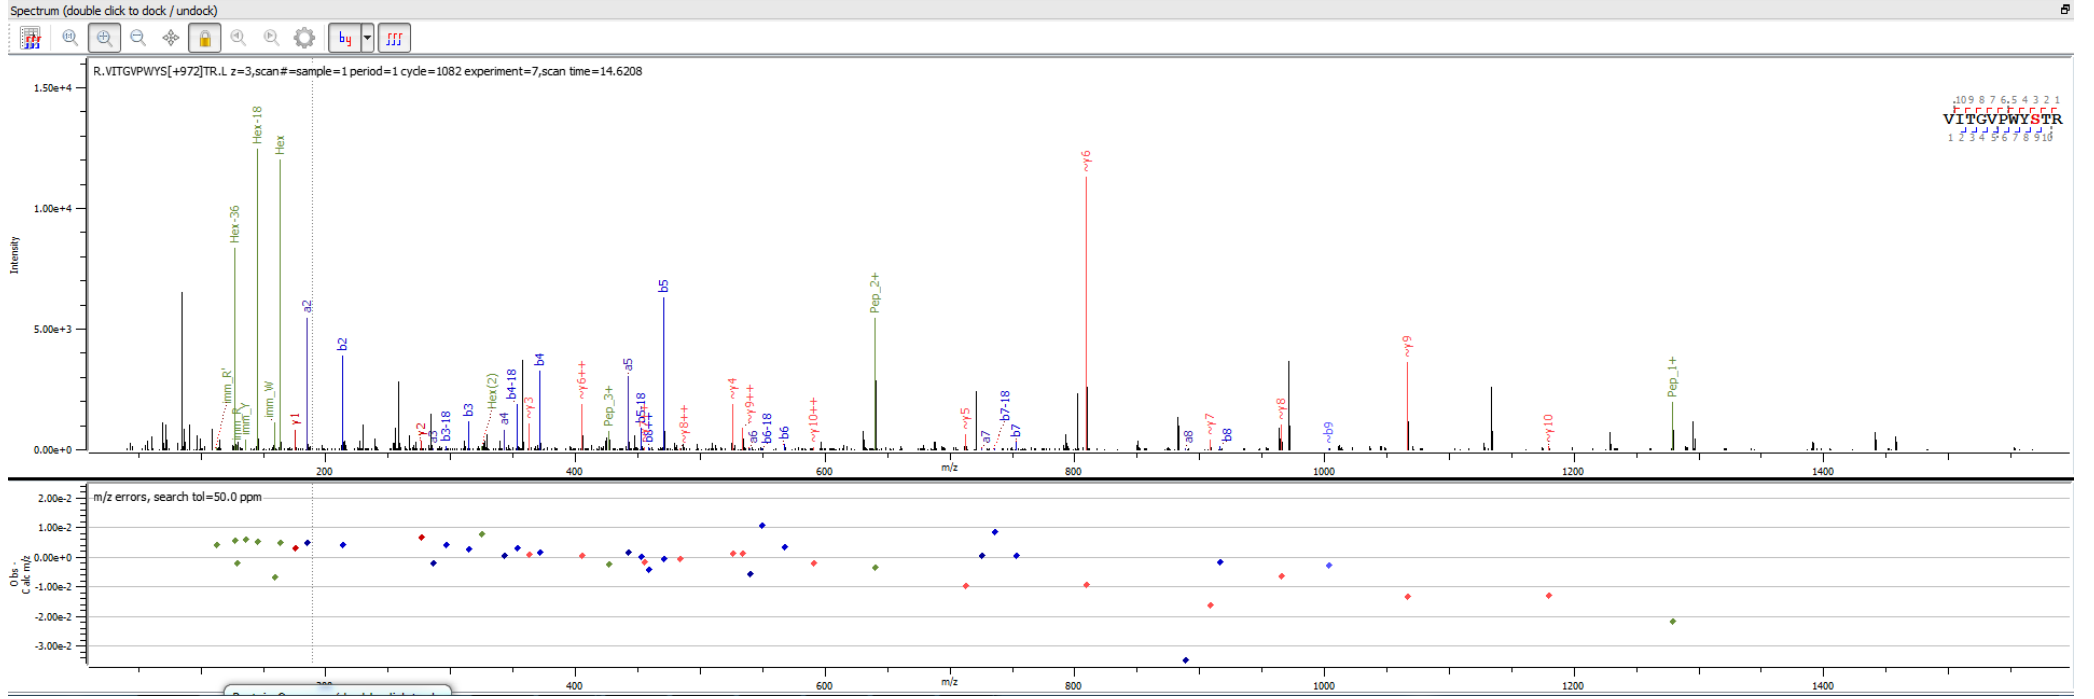

Sample S6 R.VITGVPWYS[+972.317]TR.L

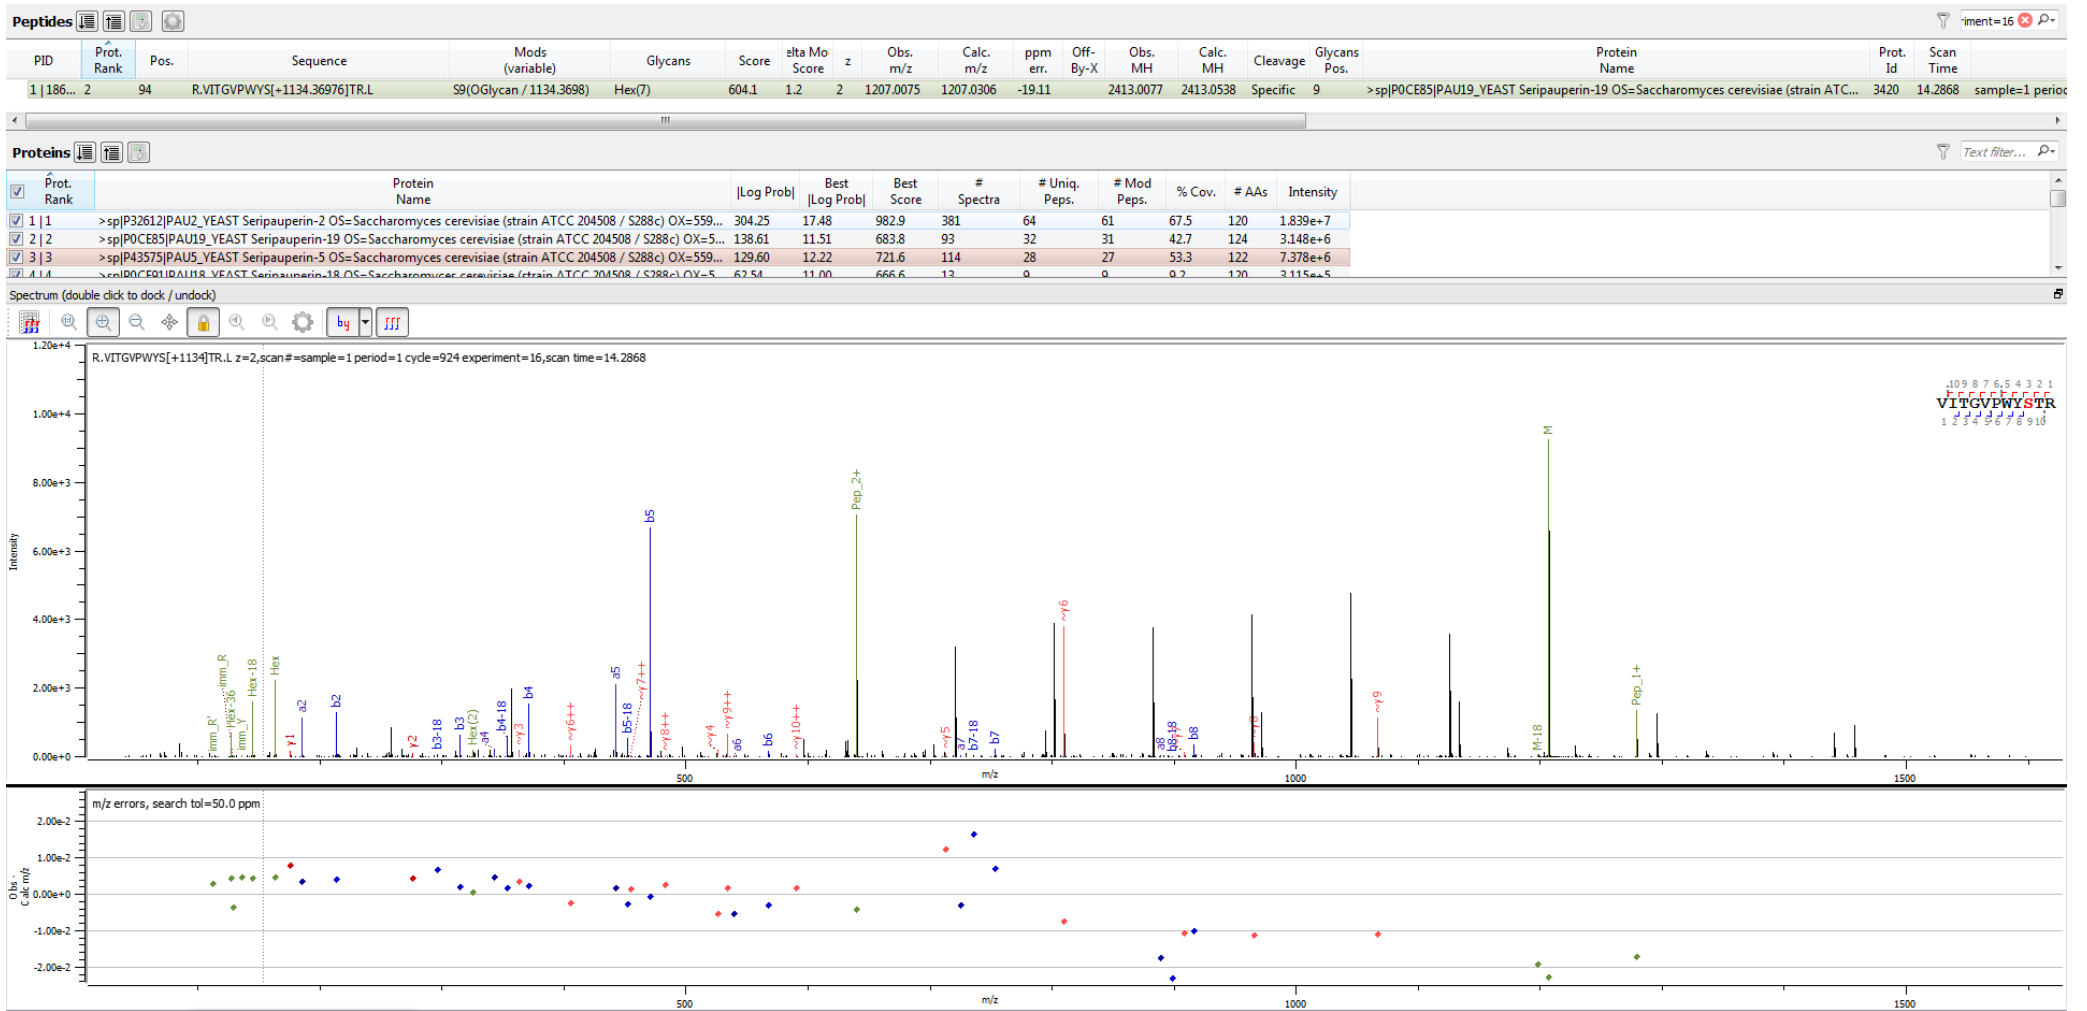

Sample S4 R.VITGVPWYS[+1134.370]TR.L

| PID        | Prot. Rank | Pos. | Sequence                     | Mods (variable)         | Glycans | Score | ΔMo Score | z | Obs. m/z | Calc. m/z | ppm err. | Off-By-X | Obs. MH   | Calc. MH  | Cleavage | Glycans Pos. | Protein Name                                                                       | Prot. Id | Scan Time |
|------------|------------|------|------------------------------|-------------------------|---------|-------|-----------|---|----------|-----------|----------|----------|-----------|-----------|----------|--------------|------------------------------------------------------------------------------------|----------|-----------|
| 1   129... | 2          | 94   | R.VITGVPWYS[+1134.36976]TR.L | S9(Oglycan / 1134.3698) | Hex(7)  | 659.5 | 1.2       | 3 | 805.0098 | 805.0228  | -16.14   |          | 2413.0149 | 2413.0538 | Specific | 9            | >sp Q07987 PAU23_YEAST Seripauperin-23 OS=Saccharomyces cerevisiae (strain ATCC... | 3438     | 14.3391   |

| Prot. Rank | Protein Name                                                                                            | [Log Prob] | Best [Log Prob] | Best Score | # Spectra | # Uniq. Peps. | # Mod Peps. | % Cov. | # AAs | Intensity |
|------------|---------------------------------------------------------------------------------------------------------|------------|-----------------|------------|-----------|---------------|-------------|--------|-------|-----------|
| 1   1      | >sp Q3E770 PAU9_YEAST Seripauperin-9 OS=Saccharomyces cerevisiae (strain ATCC 204508 / S288c) OX=559... | 288.60     | 16.66           | 988.6      | 452       | 61            | 56          | 60.8   | 120   | 1.023e+7  |
| 2   2      | >sp Q07987 PAU23_YEAST Seripauperin-23 OS=Saccharomyces cerevisiae (strain ATCC 204508 / S288c) OX=5... | 160.38     | 13.28           | 718.6      | 124       | 39            | 36          | 43.5   | 124   | 2.323e+6  |
| 3   3      | >sp P43575 PAU5_YEAST Seripauperin-5 OS=Saccharomyces cerevisiae (strain ATCC 204508 / S288c) OX=559... | 142.55     | 14.15           | 737.1      | 167       | 35            | 33          | 42.6   | 122   | 6.136e+6  |
| 4   4      | >sp K2C1_HUMAN HUManin (Common contaminant protein)                                                     | 101.54     | 13.43           | 953.1      | 37        | 11            | 0           | 20.4   | 642   | 1.801e+5  |

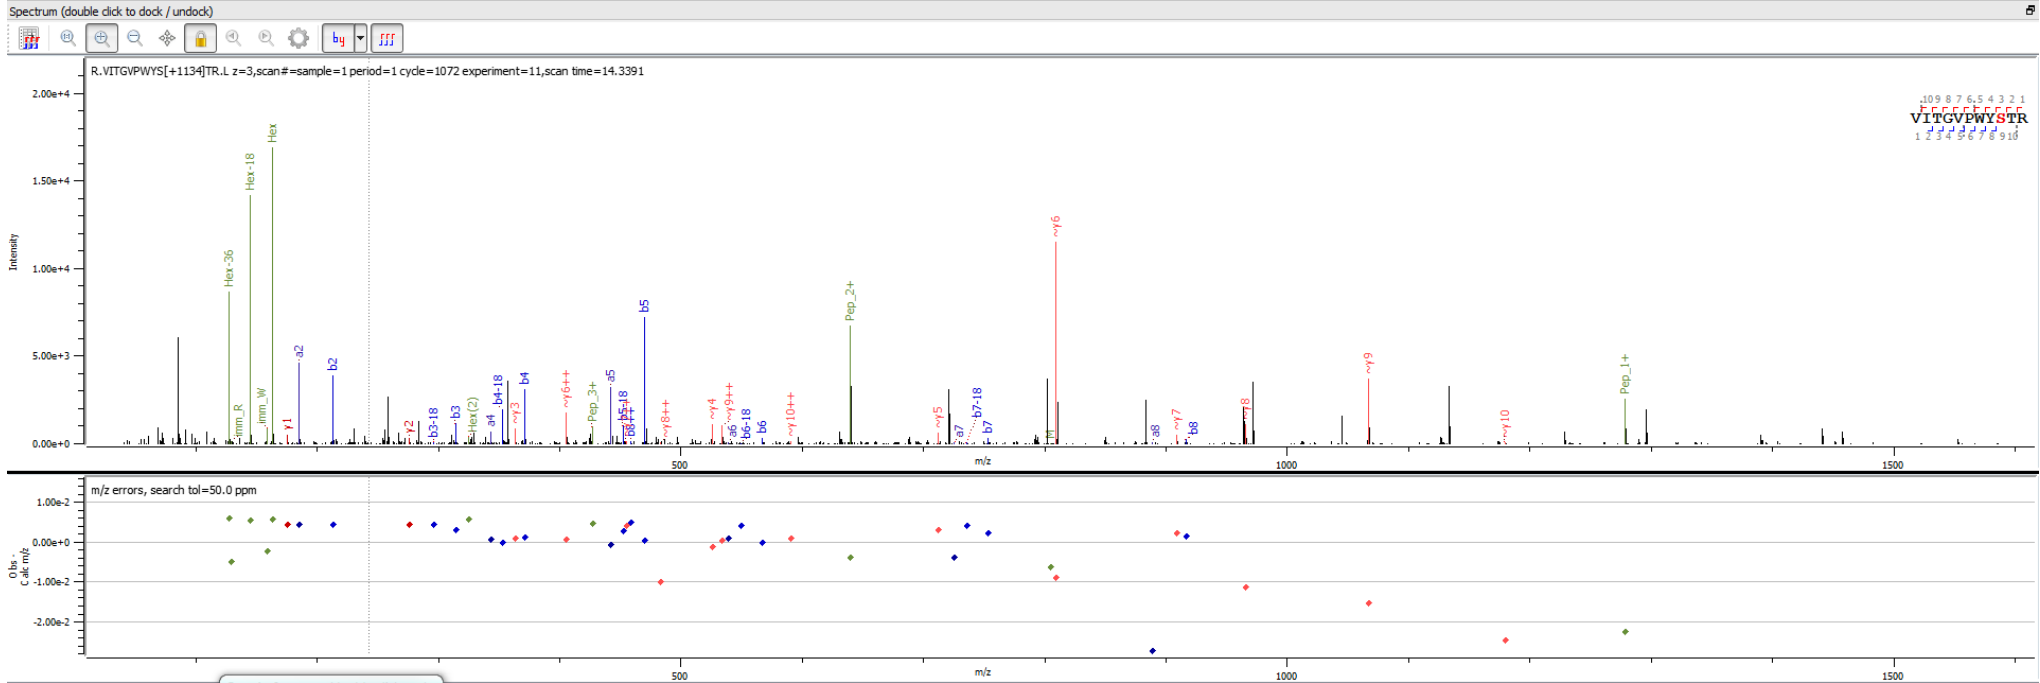

Sample S6 R.VITGVPWYS[+1134.370]TR.L

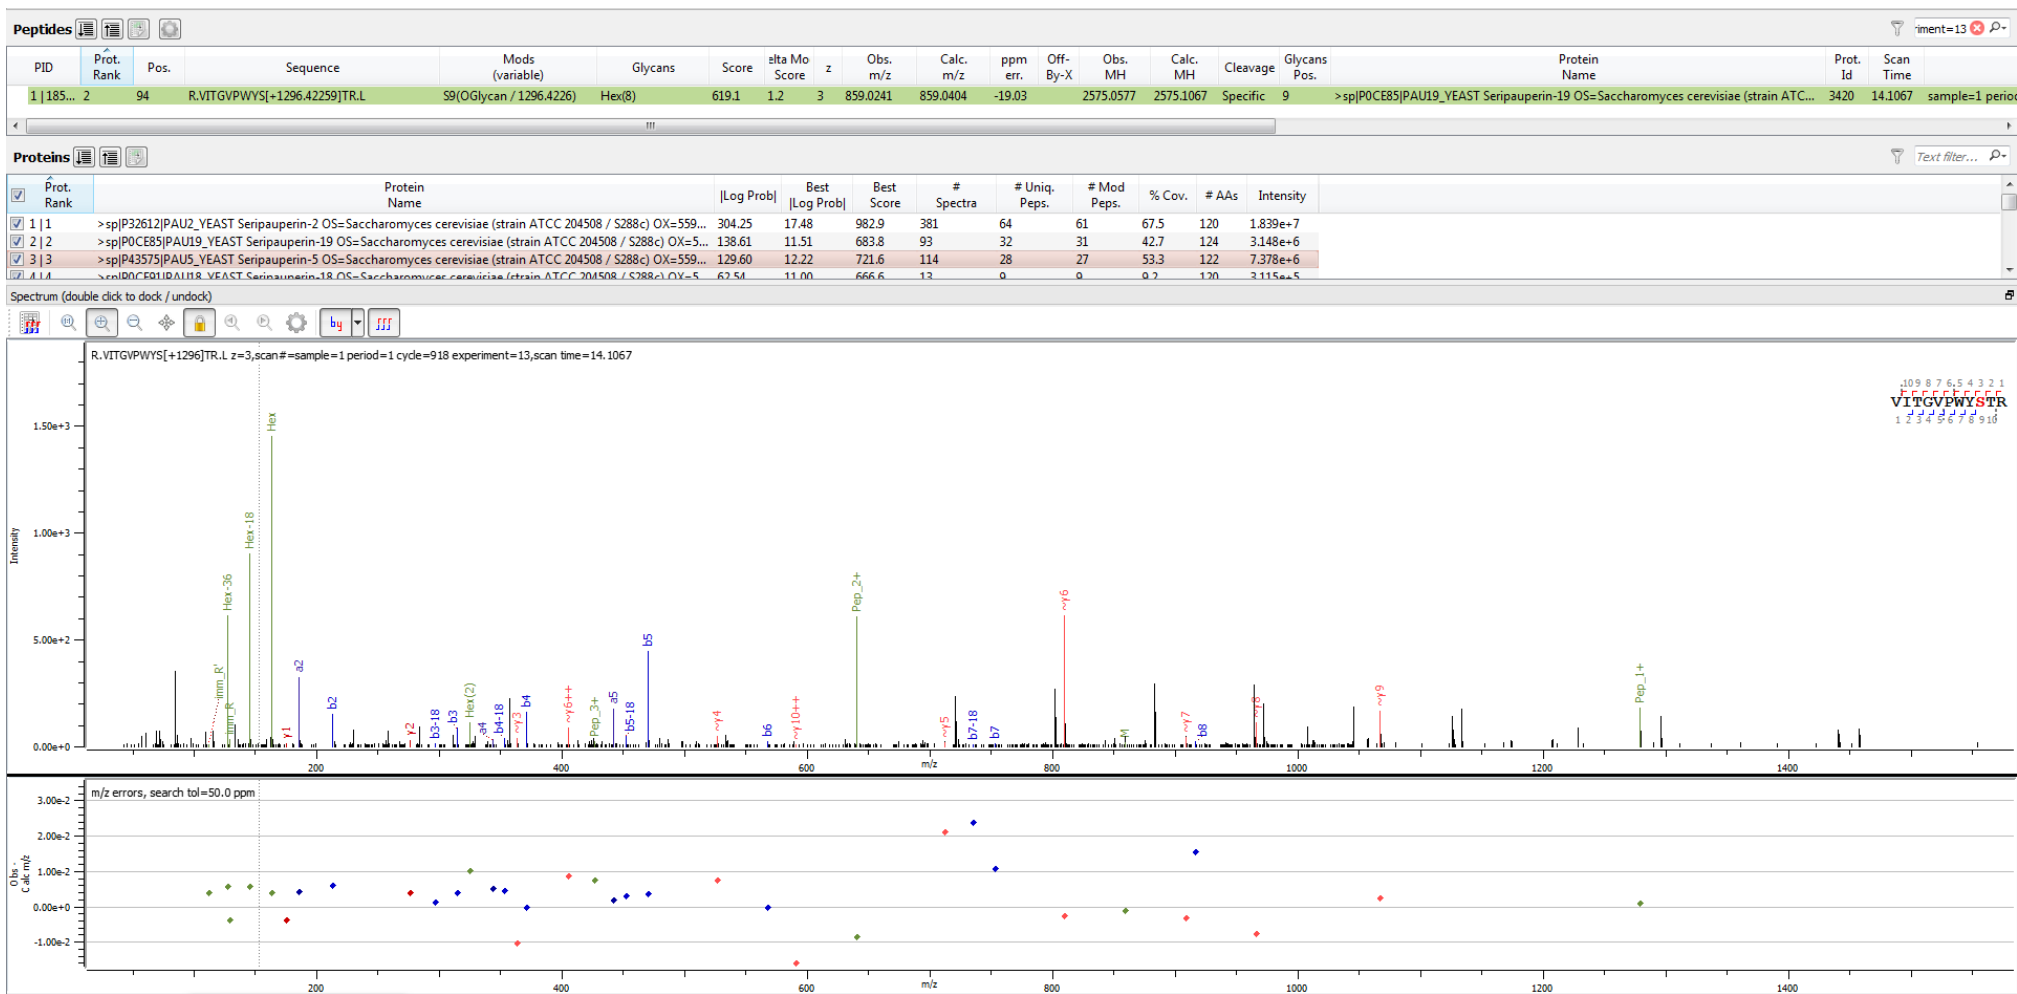

Sample S4 R.VITGVPWYS[+1296.423]TR.L



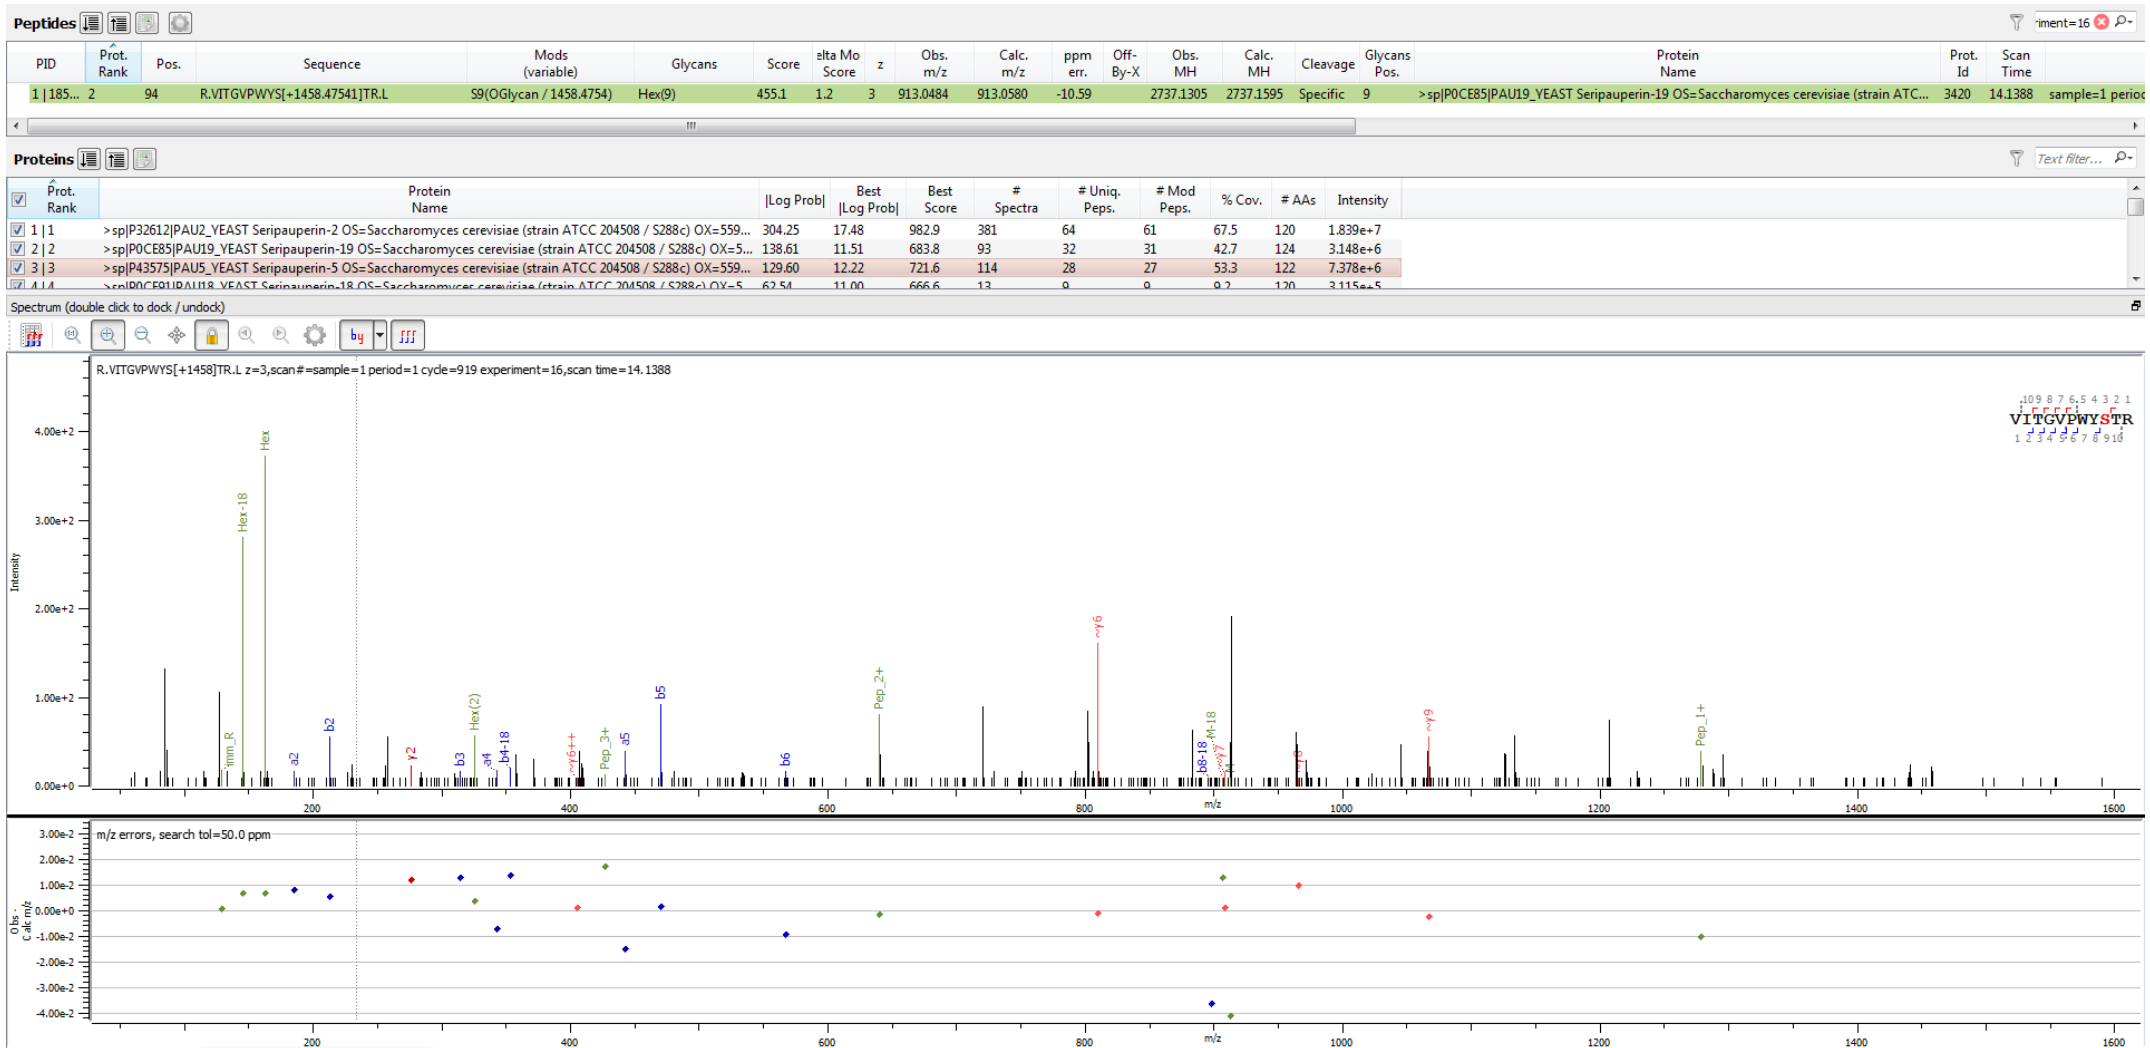

Sample S4 R.VITGVPWYS[+1458.475]TR.L

| PID | Prot. Rank | Pos. | Sequence | Mods (variable)              | Glycans                | Score  | Delta Mo Score | z   | Obs. m/z | Calc. m/z | ppm err.  | Off-By-X | Obs. MH   | Calc. MH  | Cleavage | Glycans Pos. | Protein Name                                                                      | Prot. Id | Scan Time |                 |
|-----|------------|------|----------|------------------------------|------------------------|--------|----------------|-----|----------|-----------|-----------|----------|-----------|-----------|----------|--------------|-----------------------------------------------------------------------------------|----------|-----------|-----------------|
| 1   | 193...     | 2    | 94       | R.VITGVPWYS[+972.31694]TRL.R | S9(OGlycan / 972-3169) | Hex(6) | 465.5          | 1.2 | 2        | 1182.5227 | 1182.5462 | -19.84   | 2364.0382 | 2364.0851 | Cragged  | 9            | >sp P0CE85 PAU19_YEAST Seripauperin-19 OS=Saccharomyces cerevisiae (strain ATC... | 3420     | 15.8694   | sample=1 period |

| Prot. Rank | Protein Name                                                                                            | [Log Prob] | Best [Log Prob] | Best Score | # Spectra | # Uniq. Peps. | # Mod Peps. | % Cov. | # AAs | Intensity |
|------------|---------------------------------------------------------------------------------------------------------|------------|-----------------|------------|-----------|---------------|-------------|--------|-------|-----------|
| 1          | >sp P32612 PAU2_YEAST Seripauperin-2 OS=Saccharomyces cerevisiae (strain ATCC 204508 / S288c) OX=559... | 304.25     | 17.48           | 982.9      | 381       | 64            | 61          | 67.5   | 120   | 1.839e+7  |
| 2          | >sp P32612 PAU2_YEAST Seripauperin-2 OS=Saccharomyces cerevisiae (strain ATCC 204508 / S288c) OX=559... | 138.61     | 11.51           | 683.8      | 93        | 32            | 31          | 17.7   | 120   | 3.148e+6  |

Spectrum (double click to dock / undock)

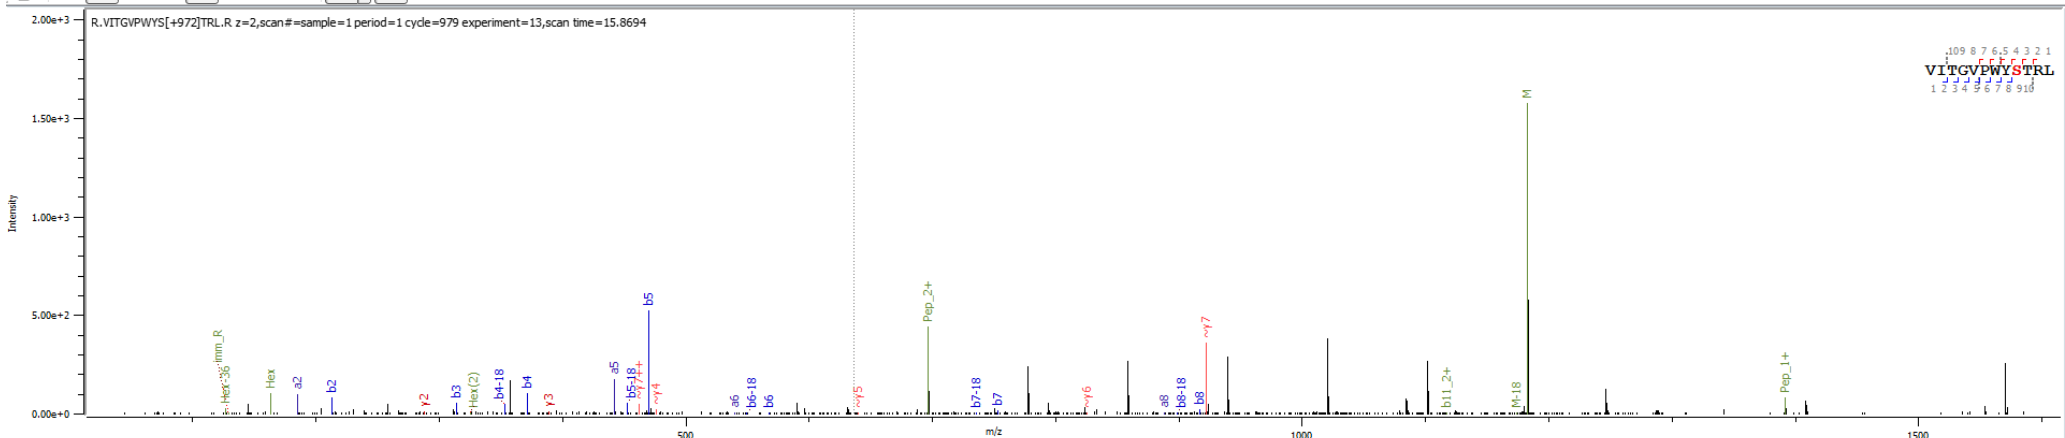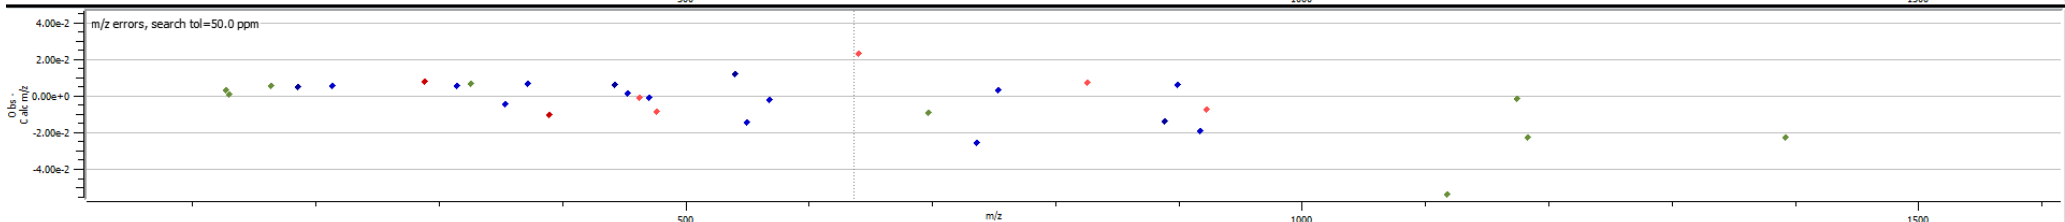

Sample S R.VITGVPWYS[+972.317]TRL.R

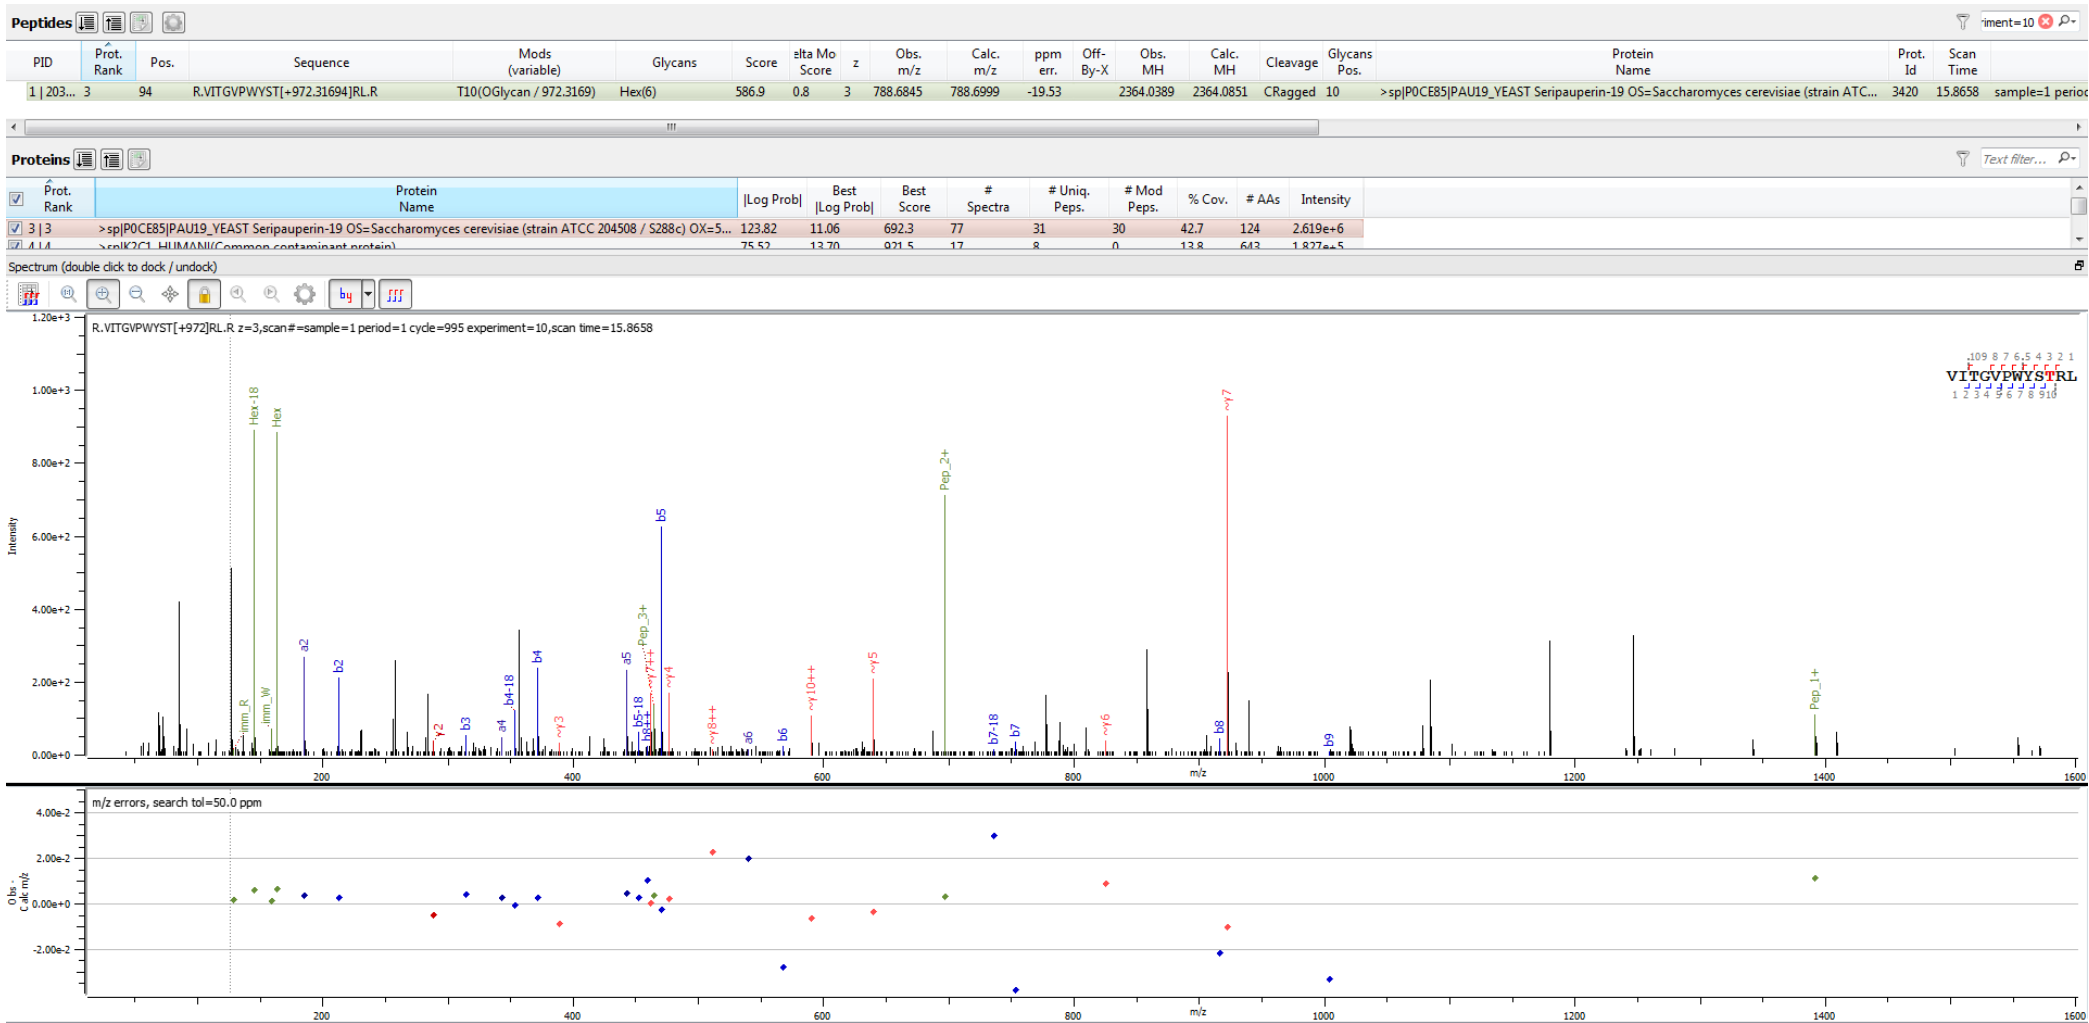

Sample S3 R.VITGVPWYST[+972.317]RL.R

| PID      | Prot. Rank | Pos. | Sequence                      | Mods (variable)         | Glycans | Score | delta Mo Score | z | Obs. m/z | Calc. m/z | ppm err. | Off-By-X | Obs. MH   | Calc. MH  | Cleavage  | Glycans Pos. | Protein Name                                                                     | Prot. Id | Scan Time               |
|----------|------------|------|-------------------------------|-------------------------|---------|-------|----------------|---|----------|-----------|----------|----------|-----------|-----------|-----------|--------------|----------------------------------------------------------------------------------|----------|-------------------------|
| 1 104... | 4          | 94   | R.VITGVPWYS[+1134.36976]TRL.R | S9(Oglycan / 1134.3698) | Hex(7)  | 574.4 | 1.2            | 3 | 842.7011 | 842.7175  | -19.51   |          | 2526.0886 | 2526.1379 | Cragged 9 |              | >sp Q07987 PAU5_YEAST Seripauperin-23 OS=Saccharomyces cerevisiae (strain ATC... | 3438     | 15.8940 sample=1 period |

| Prot. Rank | Protein Name                                                                                            | [Log Prob] | Best [Log Prob] | Best Score | # Spectra | # Uniq. Peps. | # Mod Peps. | % Cov. | # AAs | Intensity |
|------------|---------------------------------------------------------------------------------------------------------|------------|-----------------|------------|-----------|---------------|-------------|--------|-------|-----------|
| 1 1        | >sp P43575 PAU5_YEAST Seripauperin-5 OS=Saccharomyces cerevisiae (strain ATCC 204508 / S288c) OX=559... | 136.57     | 14.25           | 968.4      | 163       | 30            | 27          | 28.7   | 122   | 1.440e+6  |

Spectrum (double click to dock / undock)

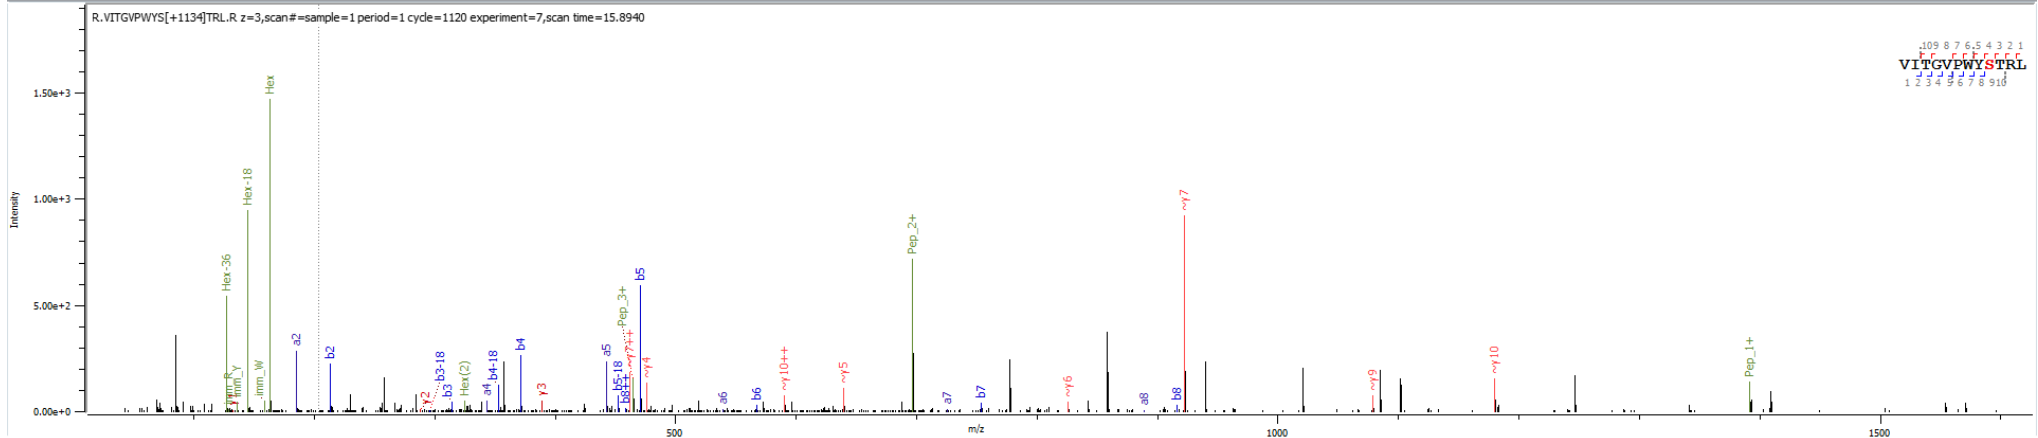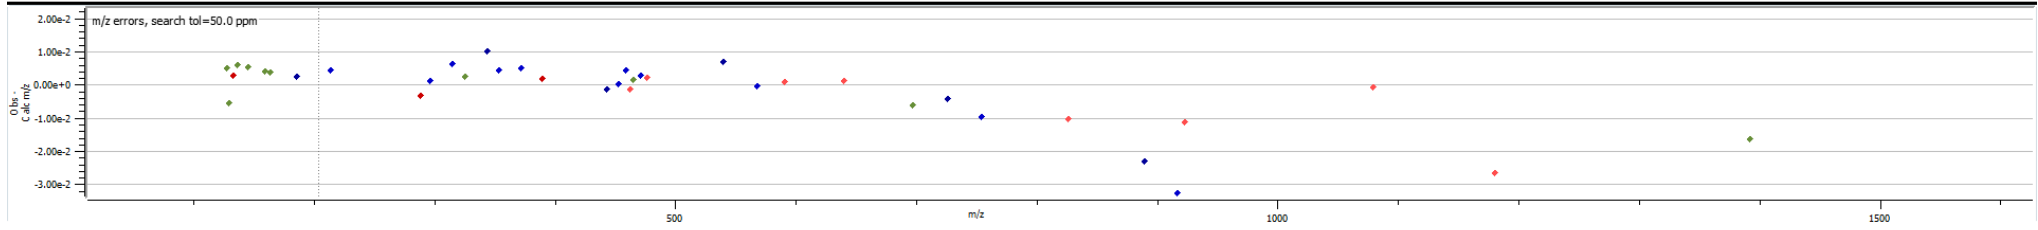

Sample S5 R.VITGVPWYS[+1134.370]TRL.R

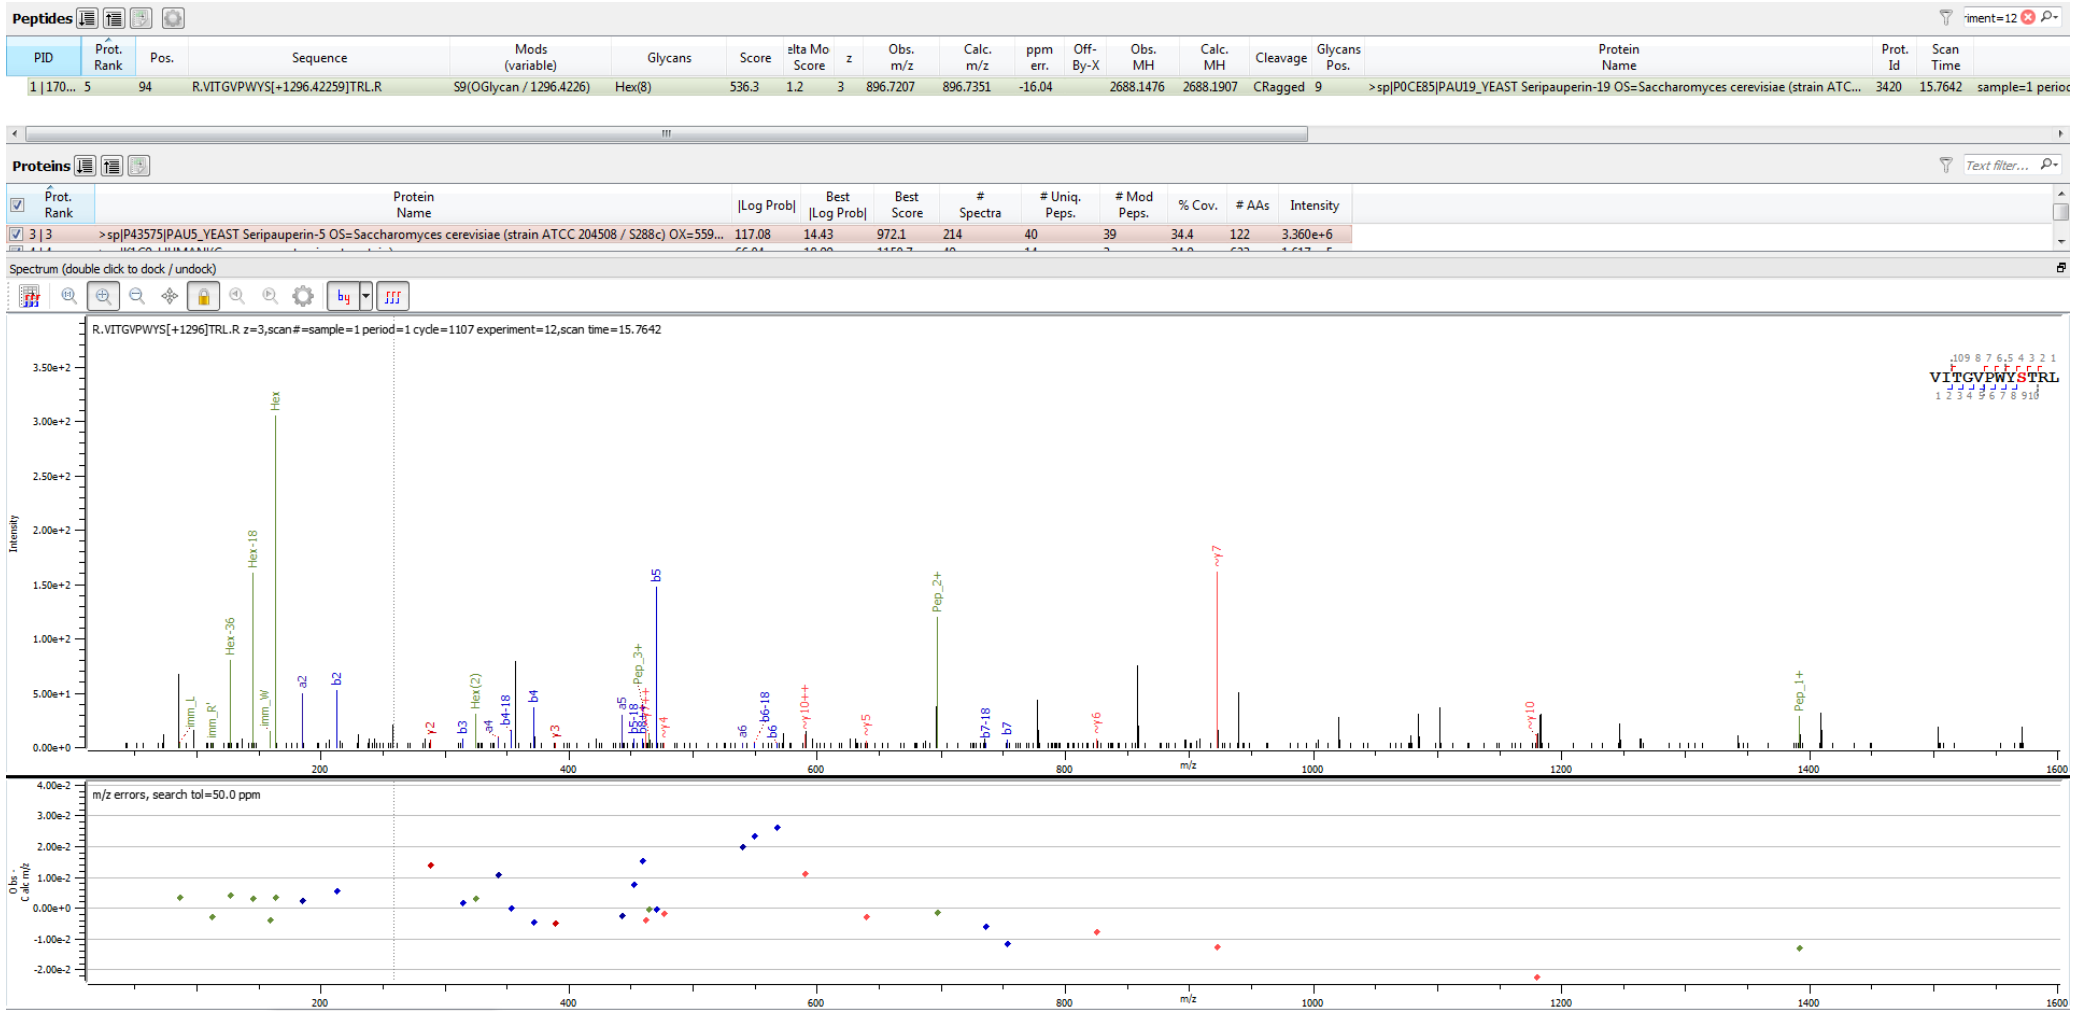

Sample S2

R.VITGVPWYS[+1296.423]TRL.R

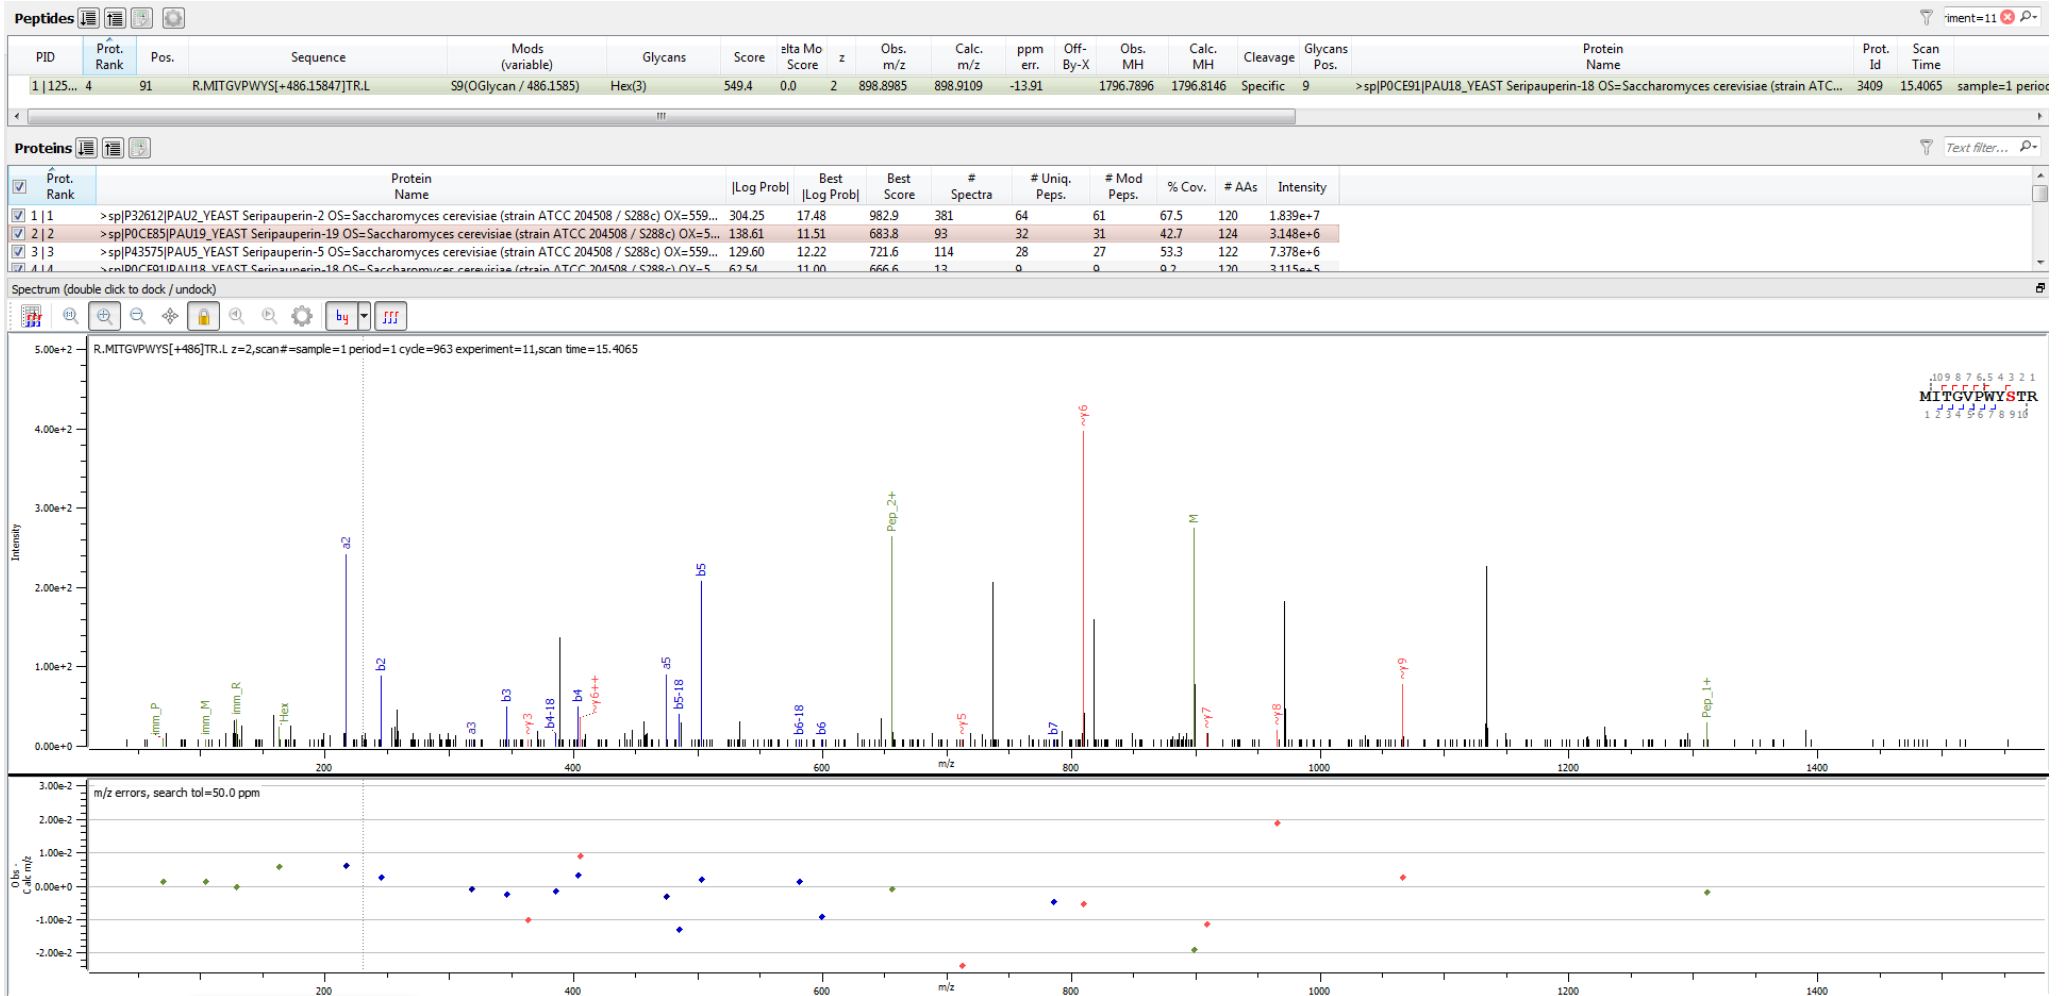

Peptide List (double click to dock / undock)

Peptides iment=14

| PID | Prot. Rank | Pos. | Sequence | Mods (variable)           | Glycans                | Score  | Δ Mo Score | z   | Obs. m/z | Calc. m/z | ppm err. | Off-By-X | Obs. MH   | Calc. MH  | Cleavage | Glycans Pos. | Protein Name                                                                      | Prot. Id | Scan Time |                 |
|-----|------------|------|----------|---------------------------|------------------------|--------|------------|-----|----------|-----------|----------|----------|-----------|-----------|----------|--------------|-----------------------------------------------------------------------------------|----------|-----------|-----------------|
| 1   | 115...     | 5    | 91       | R.MITGVPWYS[+648.211]TR.L | S9(OGlycan / 648.2113) | Hex(4) | 603.0      | 0.0 | 2        | 979.9187  | 979.9374 | -19.04   | 1958.8301 | 1958.8674 | Specific | 9            | >sp P0CE91 PAU18_YEAST Seripauperin-18 OS=Saccharomyces cerevisiae (strain ATC... | 3409     | 15.3883   | sample=1 period |

Proteins Text filter...

| Prot. Rank | Protein Name | [Log Prob]                                                                                              | Best [Log Prob] | Best Score | # Spectra | # Uniq. Peps. | # Mod Peps. | % Cov. | # AAs | Intensity |          |
|------------|--------------|---------------------------------------------------------------------------------------------------------|-----------------|------------|-----------|---------------|-------------|--------|-------|-----------|----------|
| 1          | 1            | >sp P43575 PAU5_YEAST Seripauperin-5 OS=Saccharomyces cerevisiae (strain ATCC 204508 / S288c) OX=559... | 327.47          | 16.74      | 1004.1    | 632           | 70          | 67     | 68.9  | 122       | 3.742e+7 |
| 2          | 2            | >sp P32612 PAU2_YEAST Seripauperin-2 OS=Saccharomyces cerevisiae (strain ATCC 204508 / S288c) OX=559... | 178.33          | 13.24      | 726.5     | 270           | 60          | 58     | 58.3  | 120       | 7.688e+6 |

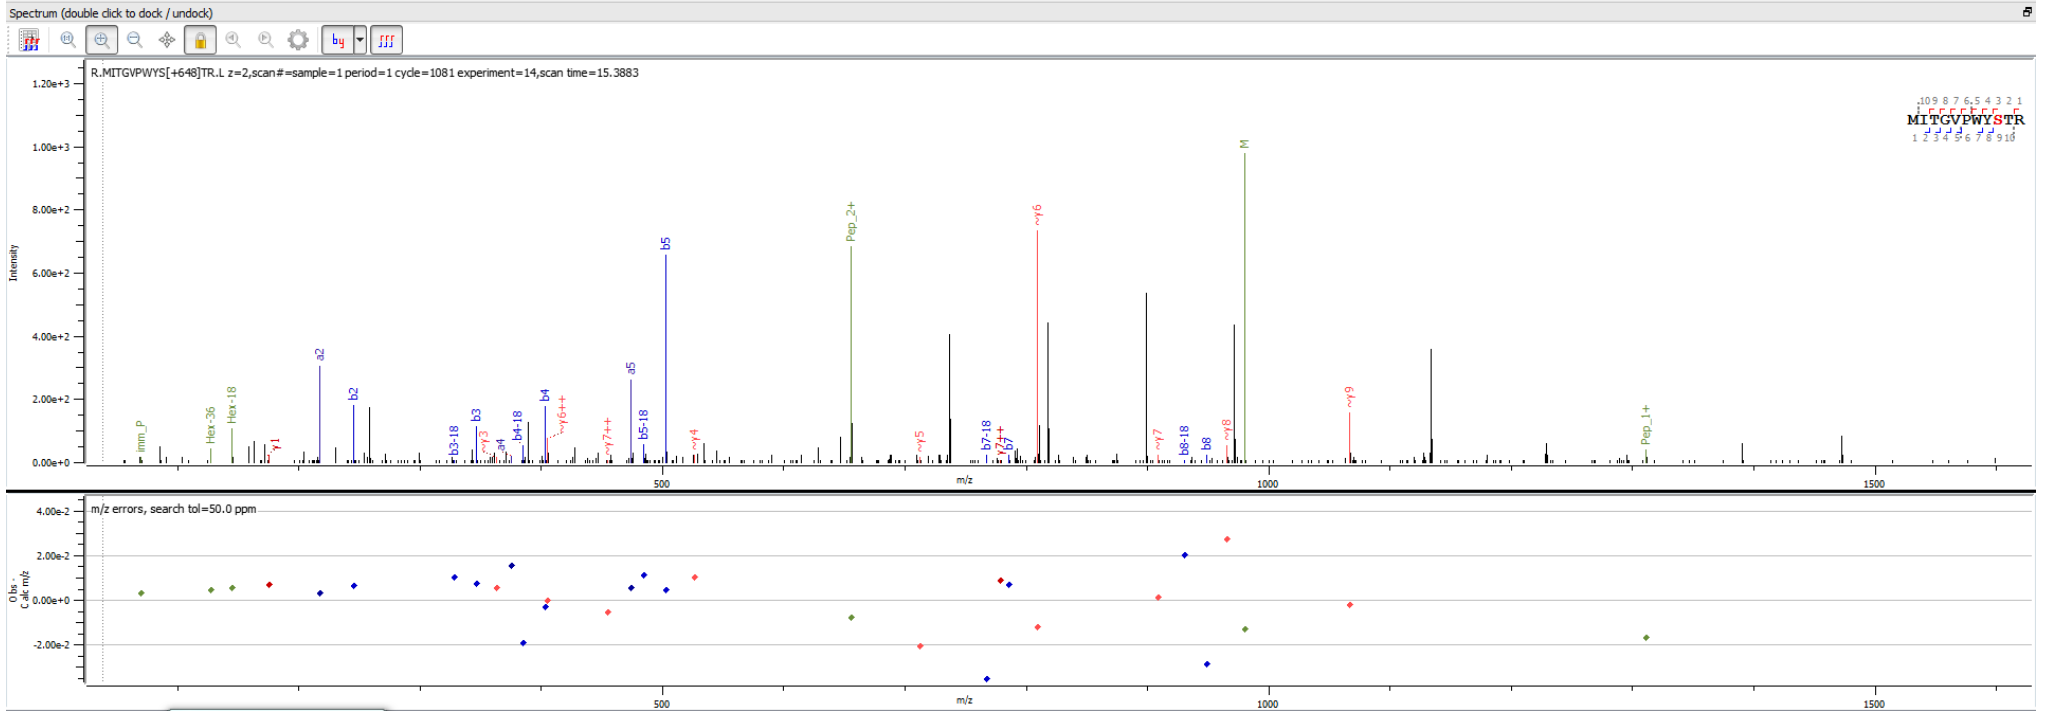

Sample S1 R.MITGVPWYS[+648.211]TR.L

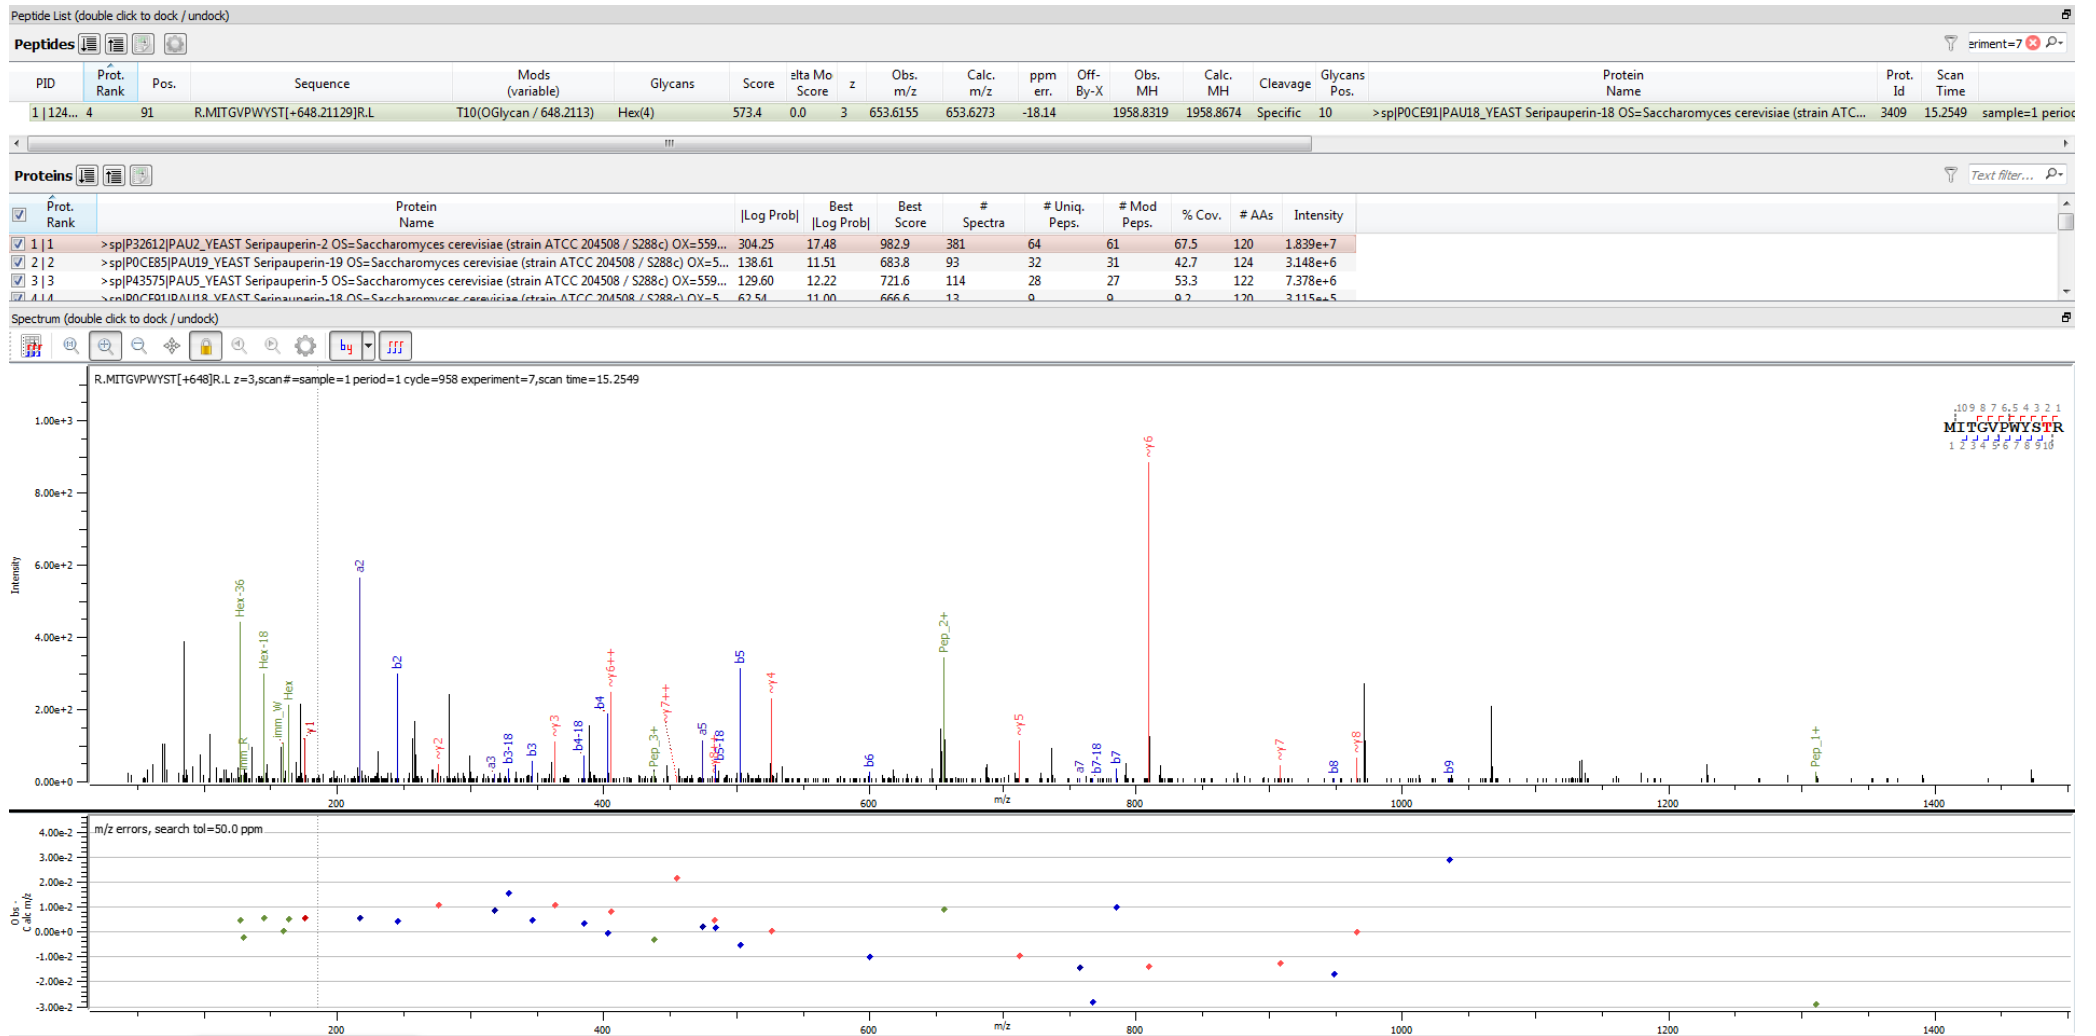

Sample S4 R.MITGVPWYS[+648.211]TR.L



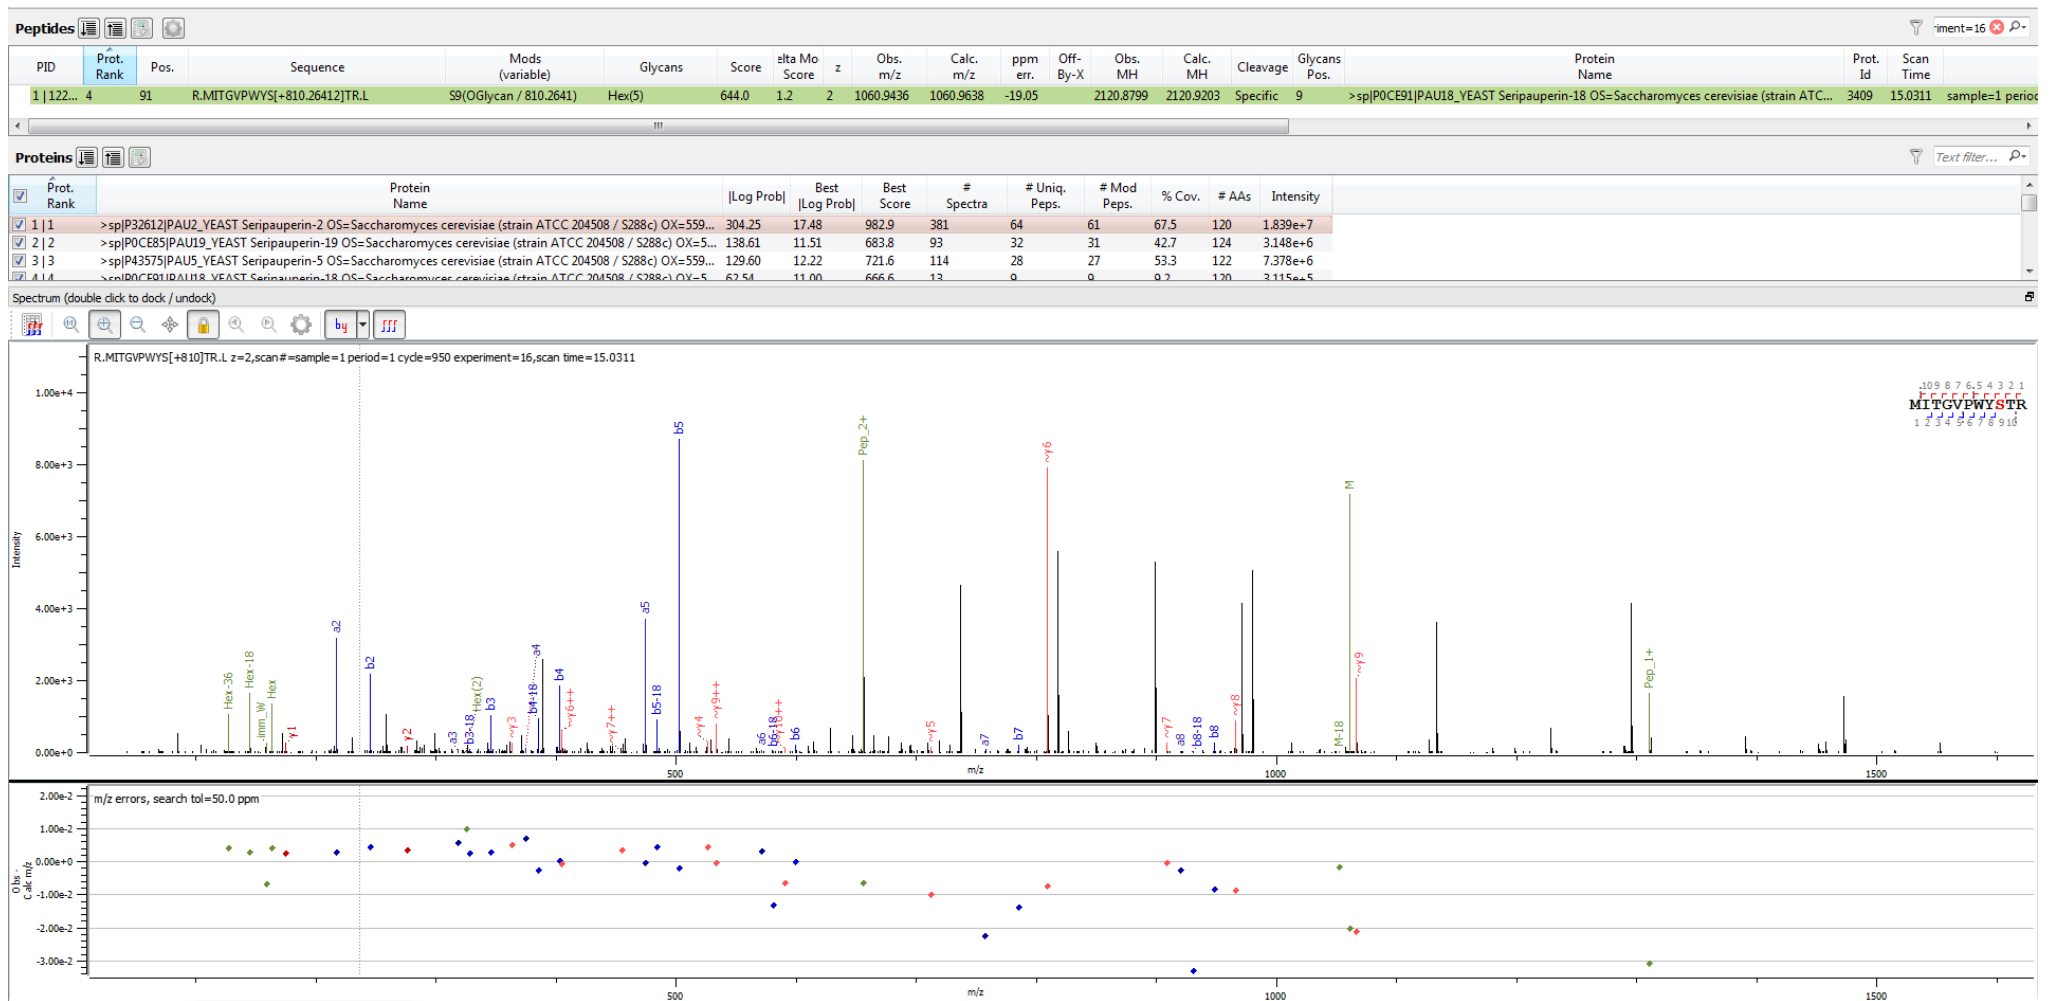

Sample S4 R.MITGVPWYS[+810.264]TR.L

| PID        | Prot. Rank | Pos. | Sequence                  | Mods (variable)        | Glycans | Score | delta Mo Score | z | Obs. m/z | Calc. m/z | ppm err. | Off-By-X | Obs. MH   | Calc. MH  | Cleavage | Glycans Pos. | Protein Name                                                                      | Prot. Id | Scan Time |                |
|------------|------------|------|---------------------------|------------------------|---------|-------|----------------|---|----------|-----------|----------|----------|-----------|-----------|----------|--------------|-----------------------------------------------------------------------------------|----------|-----------|----------------|
| 1   957... | 6          | 91   | R.MITGVPWYS[+810.264]TR.L | S9(OGlycan / 810.2641) | Hex(5)  | 684.2 | 1.2            | 3 | 707.6310 | 707.6449  | -19.79   |          | 2120.8783 | 2120.9203 | Specific | 9            | >sp P0CE91 PAU18_YEAST Seripauperin-18 OS=Saccharomyces cerevisiae (strain ATC... | 3409     | 15.2348   | sample=1 perio |

| Prot. Rank | Protein Name                                                                                                 | Log Prob | Best Log Prob | Best Score | # Spectra | # Uniq. Peps. | # Mod Peps. | % Cov. | # AAs | Intensity |
|------------|--------------------------------------------------------------------------------------------------------------|----------|---------------|------------|-----------|---------------|-------------|--------|-------|-----------|
| 10   10    | >sp P47178 DANI1_YEAST Cell wall protein DANI1 OS=Saccharomyces cerevisiae (strain ATCC 204508 / S288c) ...  | 22.21    | 11.15         | 731.5      | 10        | 6             | 6           | 11.7   | 298   | 8.248e+4  |
| 11   11    | >sp P53301 CRH1_YEAST Probable glycosidase CRH1 OS=Saccharomyces cerevisiae (strain ATCC 204508 / S2...      | 20.22    | 7.86          | 610.2      | 15        | 5             | 0           | 9.5    | 507   | 2.426e+4  |
| 12   12    | >sp P39005 KRE9_YEAST Cell wall synthesis protein KRE9 OS=Saccharomyces cerevisiae (strain ATCC 204508 / ... | 19.98    | 15.00         | 926.4      | 2         | 2             | 1           | 13.8   | 276   | 7.218e+3  |
| 13   13    | >sp D38616 VGP1_YEAST Protein VGP1 OS=Saccharomyces cerevisiae (strain ATCC 204508 / S288c) OY=55020         | 18.40    | 12.21         | 767.7      | 4         | 2             | 0           | 8.5    | 354   | 1.708e+4  |

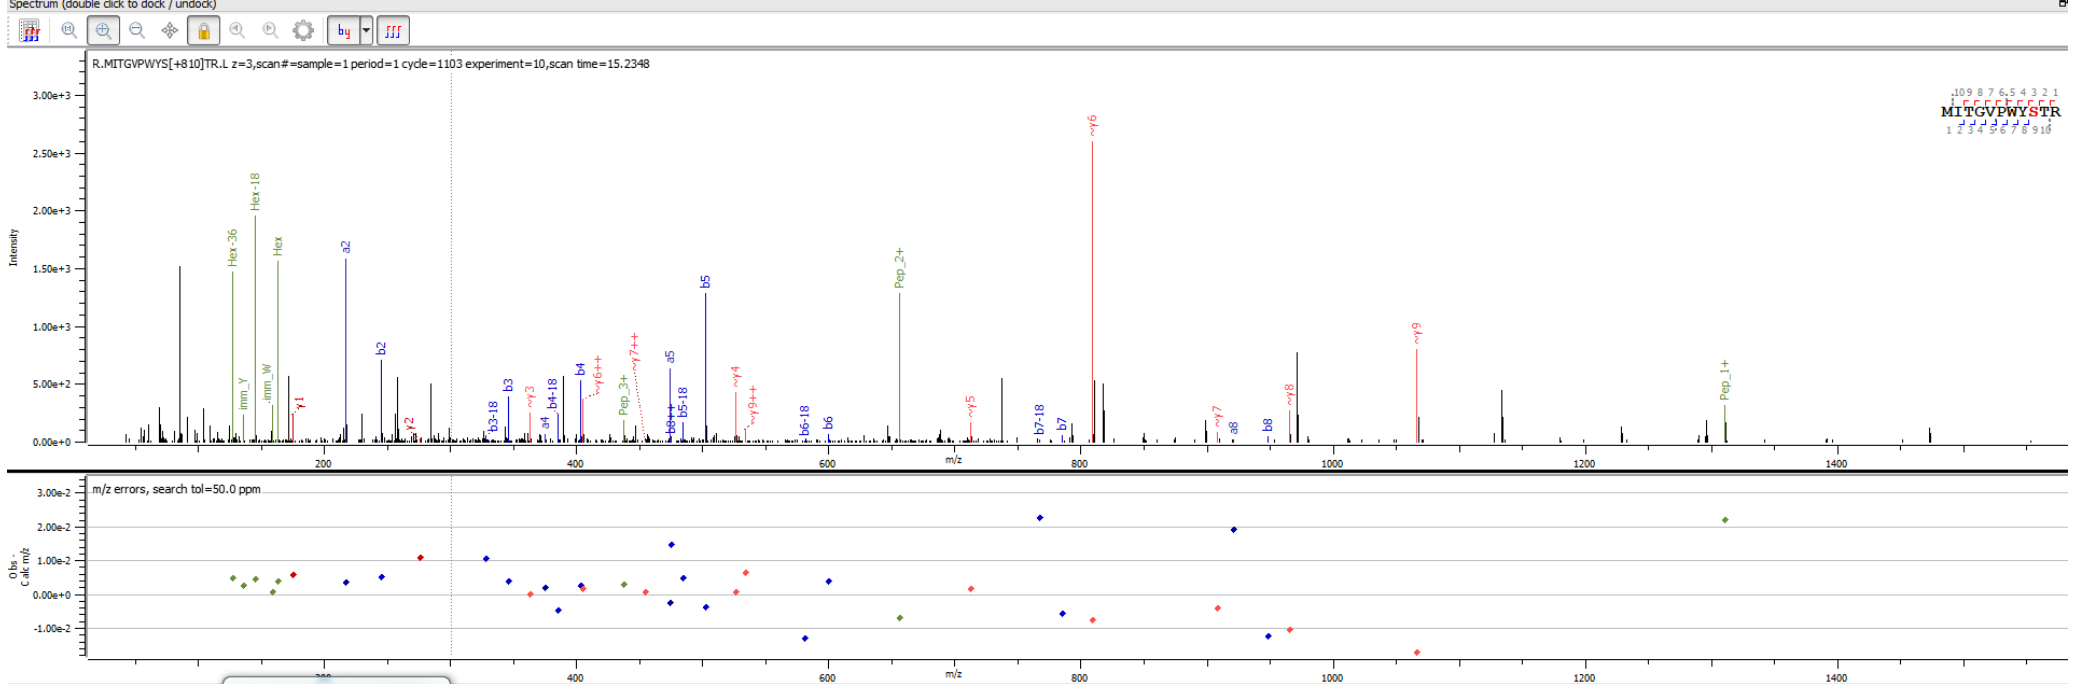

Sample S6 R.MITGVPWYS[+810.264]TR.L

| PID        | Prot. Rank | Pos. | Sequence                    | Mods (variable)        | Glycans | Score | delta Mo Score | z | Obs. m/z  | Calc. m/z | ppm err. | Off-By-X | Obs. MH   | Calc. MH  | Cleavage | Glycans Pos. | Protein Name                                                                       | Prot. Id | Scan Time |
|------------|------------|------|-----------------------------|------------------------|---------|-------|----------------|---|-----------|-----------|----------|----------|-----------|-----------|----------|--------------|------------------------------------------------------------------------------------|----------|-----------|
| 1   134... | 6          | 91   | R.MITGVPWYS[+972.31694]TR.L | S9(OGlycan / 972.3169) | Hex(6)  | 610.3 | 1.2            | 2 | 1141.9723 | 1141.9902 | -15.67   |          | 2282.9373 | 2282.9731 | Specific | 9            | >sp POCE91 PAU18_YEAST Seripauperin-18 OS=Saccharomyces cerevisiae (strain ATCC... | 3409     | 15.0656   |

| Prot. Rank | Protein Name                                                                                                 | [Log Prob] | Best [Log Prob] | Best Score | # Spectra | # Uniq. Peps. | # Mod Peps. | % Cov. | # AAs | Intensity |
|------------|--------------------------------------------------------------------------------------------------------------|------------|-----------------|------------|-----------|---------------|-------------|--------|-------|-----------|
| 10   10    | >sp P47178 DANI1_YEAST Cell wall protein DANI1 OS=Saccharomyces cerevisiae (strain ATCC 204508 / S288c) ...  | 22.21      | 11.15           | 731.5      | 10        | 6             | 6           | 11.7   | 298   | 8.248e+4  |
| 11   11    | >sp P53301 CRH1_YEAST Probable glycosidase CRH1 OS=Saccharomyces cerevisiae (strain ATCC 204508 / S2...      | 20.22      | 7.86            | 610.2      | 15        | 5             | 0           | 9.5    | 507   | 2.426e+4  |
| 12   12    | >sp P39005 KRE9_YEAST Cell wall synthesis protein KRE9 OS=Saccharomyces cerevisiae (strain ATCC 204508 / ... | 19.98      | 15.00           | 926.4      | 2         | 2             | 1           | 13.8   | 276   | 7.218e+3  |
| 13   13    | >sp D38616 VGG1_YEAST Protein VGG1 OS=Saccharomyces cerevisiae (strain ATCC 204508 / S288c) OX=55029         | 18.49      | 12.21           | 767.7      | 4         | 2             | 0           | 8.5    | 354   | 1.708e+4  |

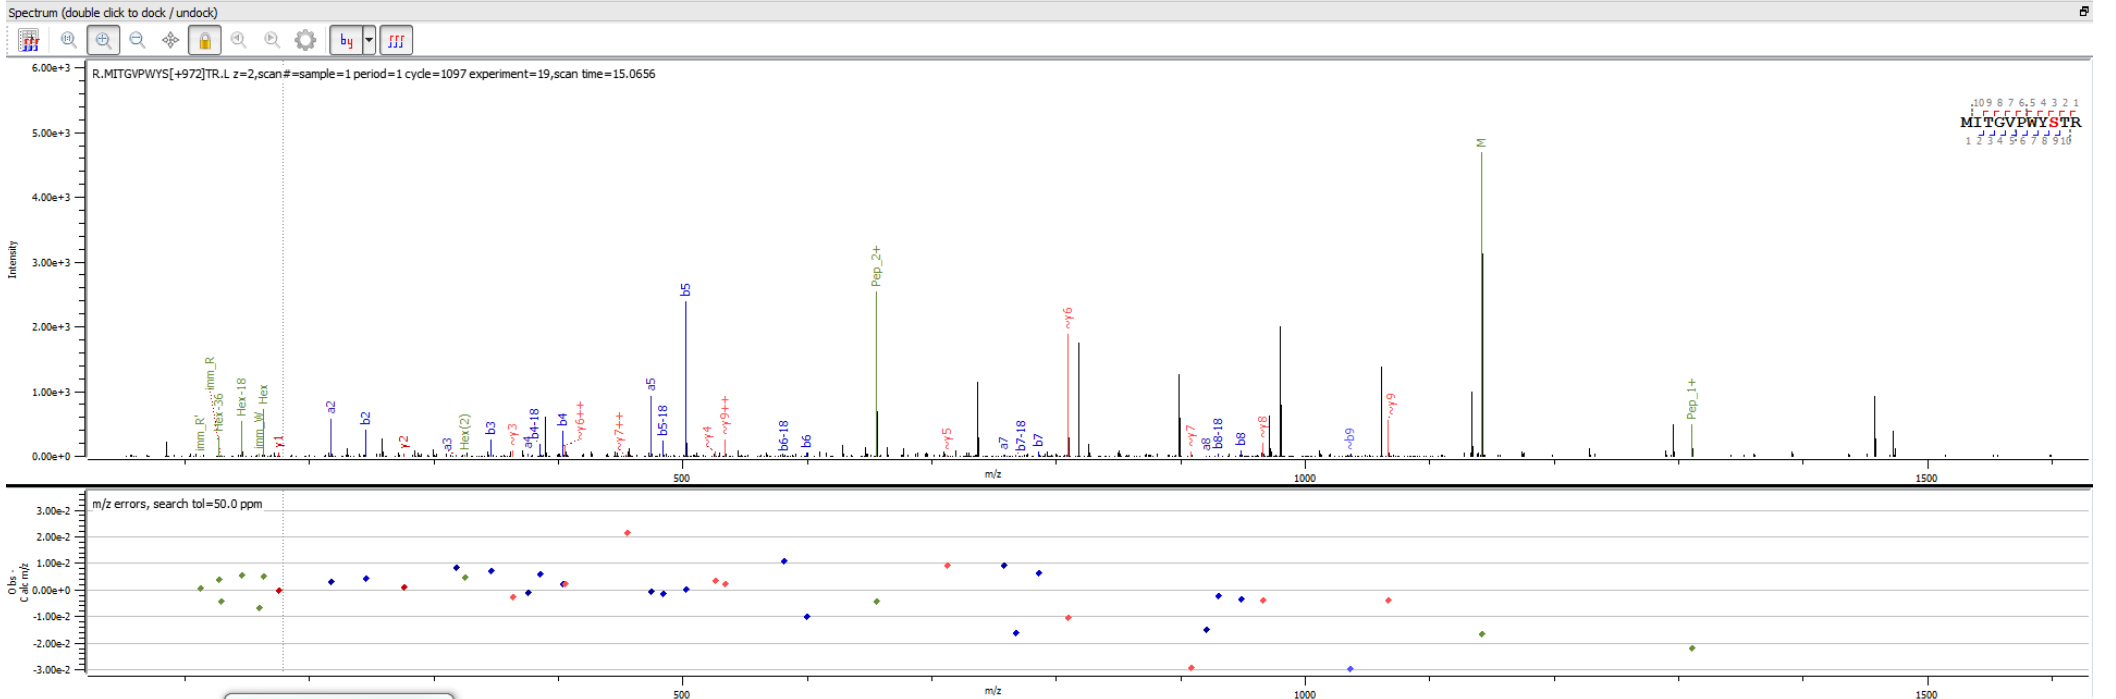

Sample S6 R.MITGVPWYS[+972.317]TR.L

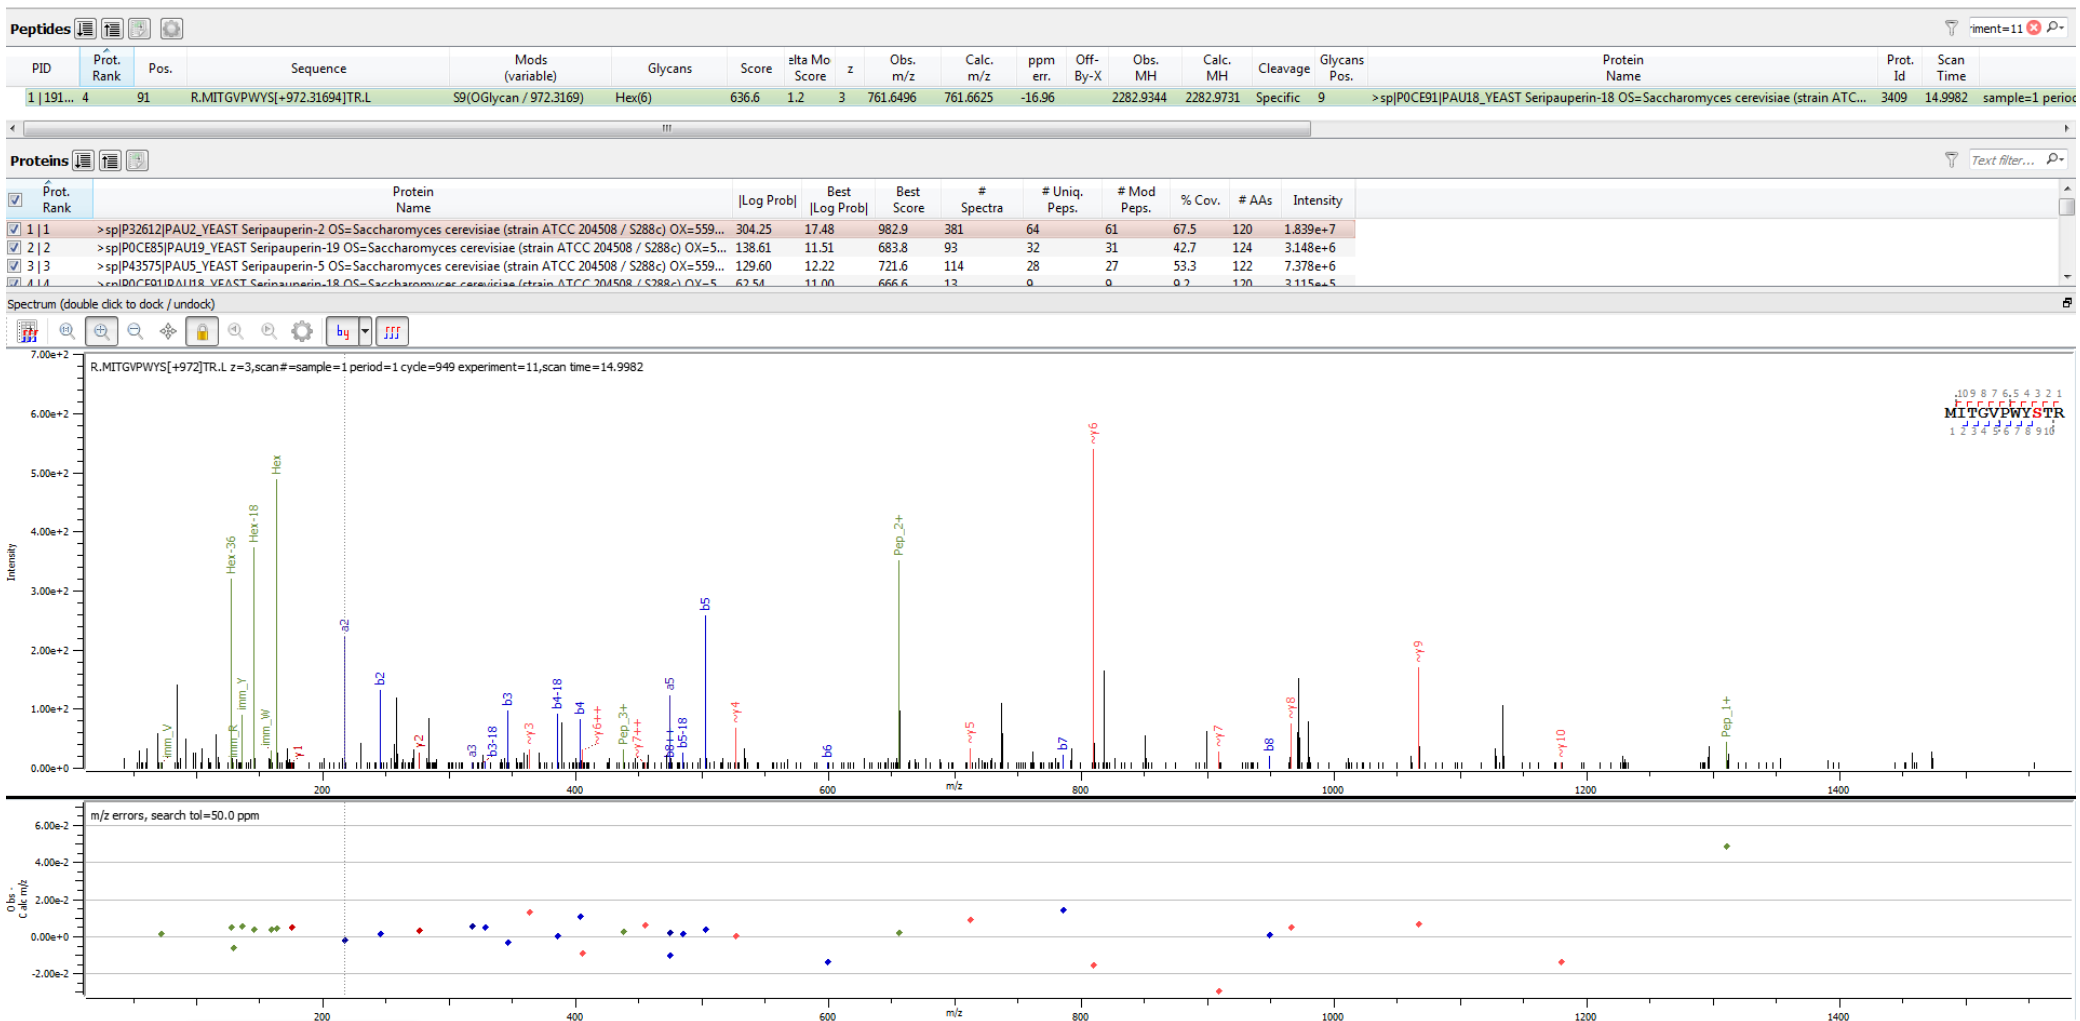

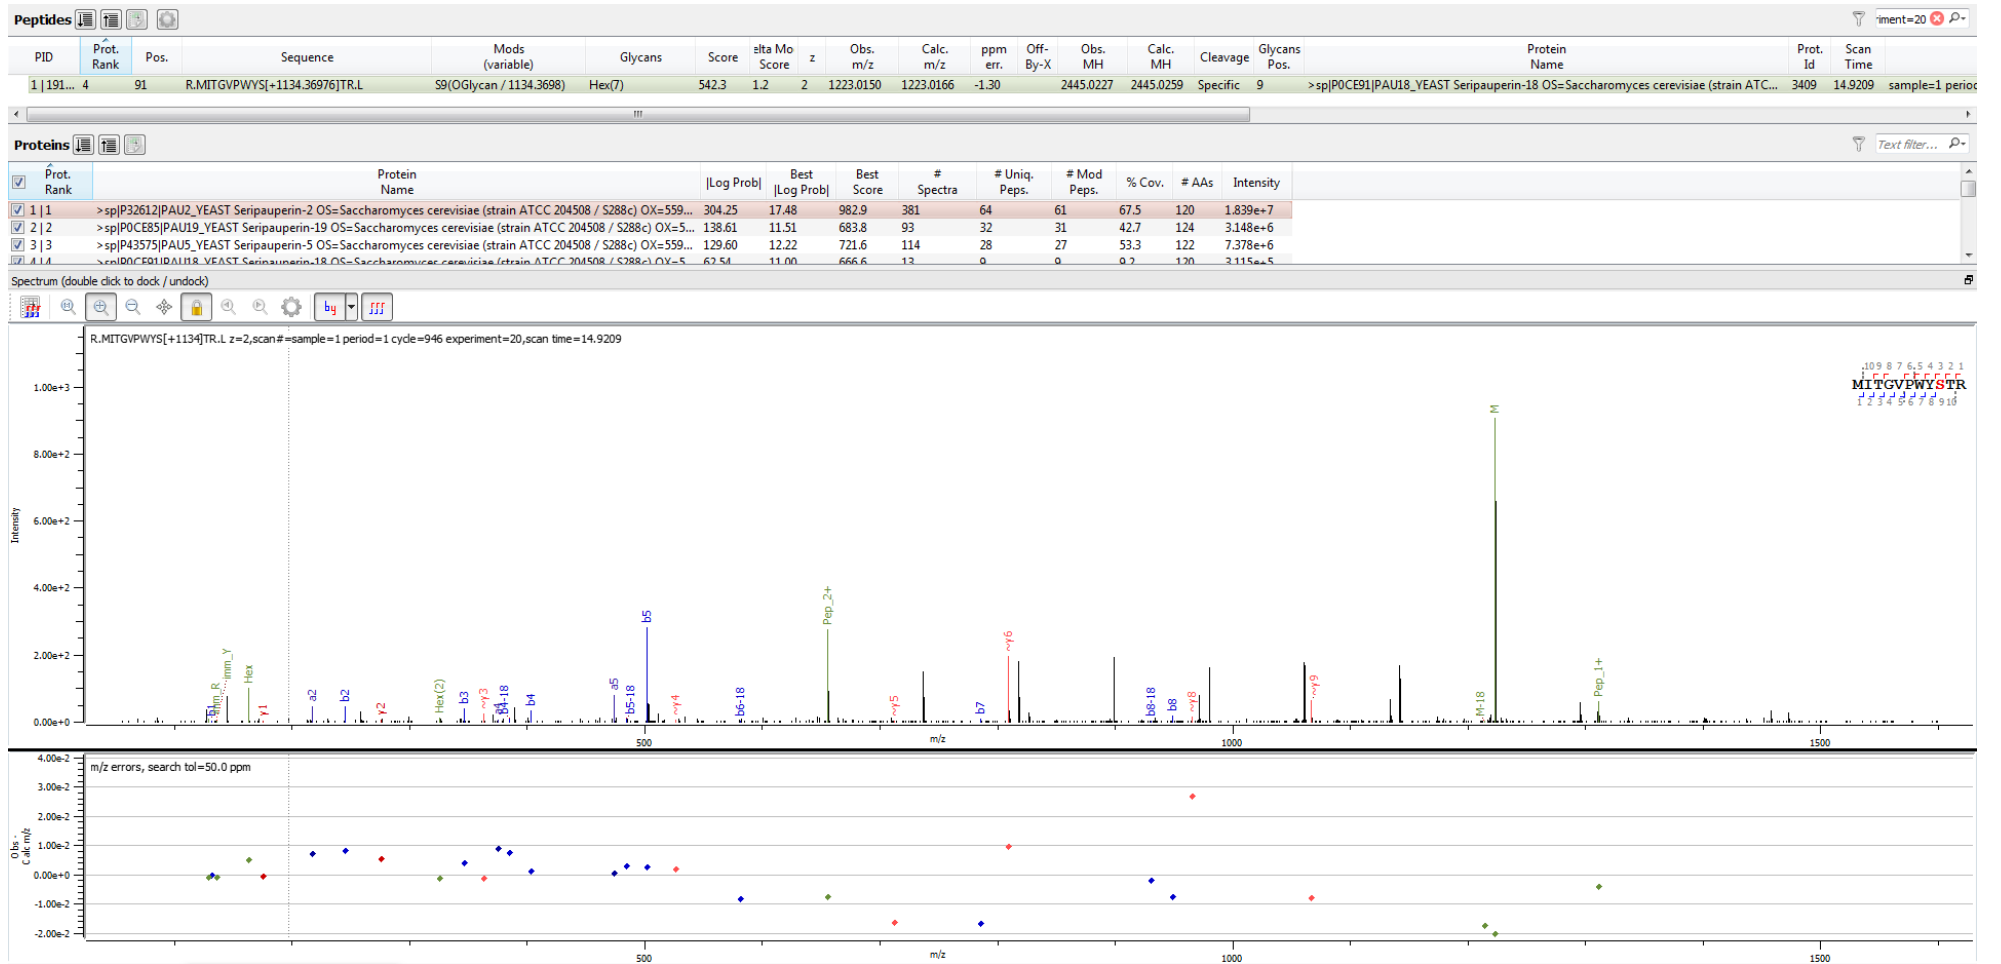

Sample S4



| PID | Prot. Rank | Pos. | Sequence                   | Mods (variable)        | Glycans | Score | delta Mo Score | z | Obs. m/z | Calc. m/z | ppm err. | Off-By-X | Obs. MH   | Calc. MH  | Cleavage  | Glycans Pos. | Protein Name                                                                       | Prot. Id | Scan Time                |
|-----|------------|------|----------------------------|------------------------|---------|-------|----------------|---|----------|-----------|----------|----------|-----------|-----------|-----------|--------------|------------------------------------------------------------------------------------|----------|--------------------------|
| 1   | 1          | 47   | R.AHLAEYY[S]+162.05282]F.Q | S8(OGlycan / 162.0528) | Hex(1)  | 545.3 | 277.6          | 2 | 631.7762 | 631.7824  | -9.85    |          | 1262.5451 | 1262.5575 | Cragged 8 |              | >sp P43575 PAU5_YEAST Seripauperin-5 OS=Saccharomyces cerevisiae (strain ATCC 2... | 3411     | 15.0035 sample=1 period= |

| Prot. Rank | Protein Name                                                                                            | [Log Prob] | Best [Log Prob] | Best Score | # Spectra | # Uniq. Peps. | # Mod. Peps. | % Cov. | # AAs | Intensity |
|------------|---------------------------------------------------------------------------------------------------------|------------|-----------------|------------|-----------|---------------|--------------|--------|-------|-----------|
| 1          | >sp P43575 PAU5_YEAST Seripauperin-5 OS=Saccharomyces cerevisiae (strain ATCC 204508 / S288c) OX=559... | 327.47     | 16.74           | 1004.1     | 632       | 70            | 67           | 68.9   | 122   | 3.742e+7  |
| 2          | >sp P32612 PAU2_YEAST Seripauperin-2 OS=Saccharomyces cerevisiae (strain ATCC 204508 / S288c) OX=559... | 178.33     | 13.24           | 726.5      | 270       | 60            | 58           | 58.3   | 120   | 7.688e+6  |

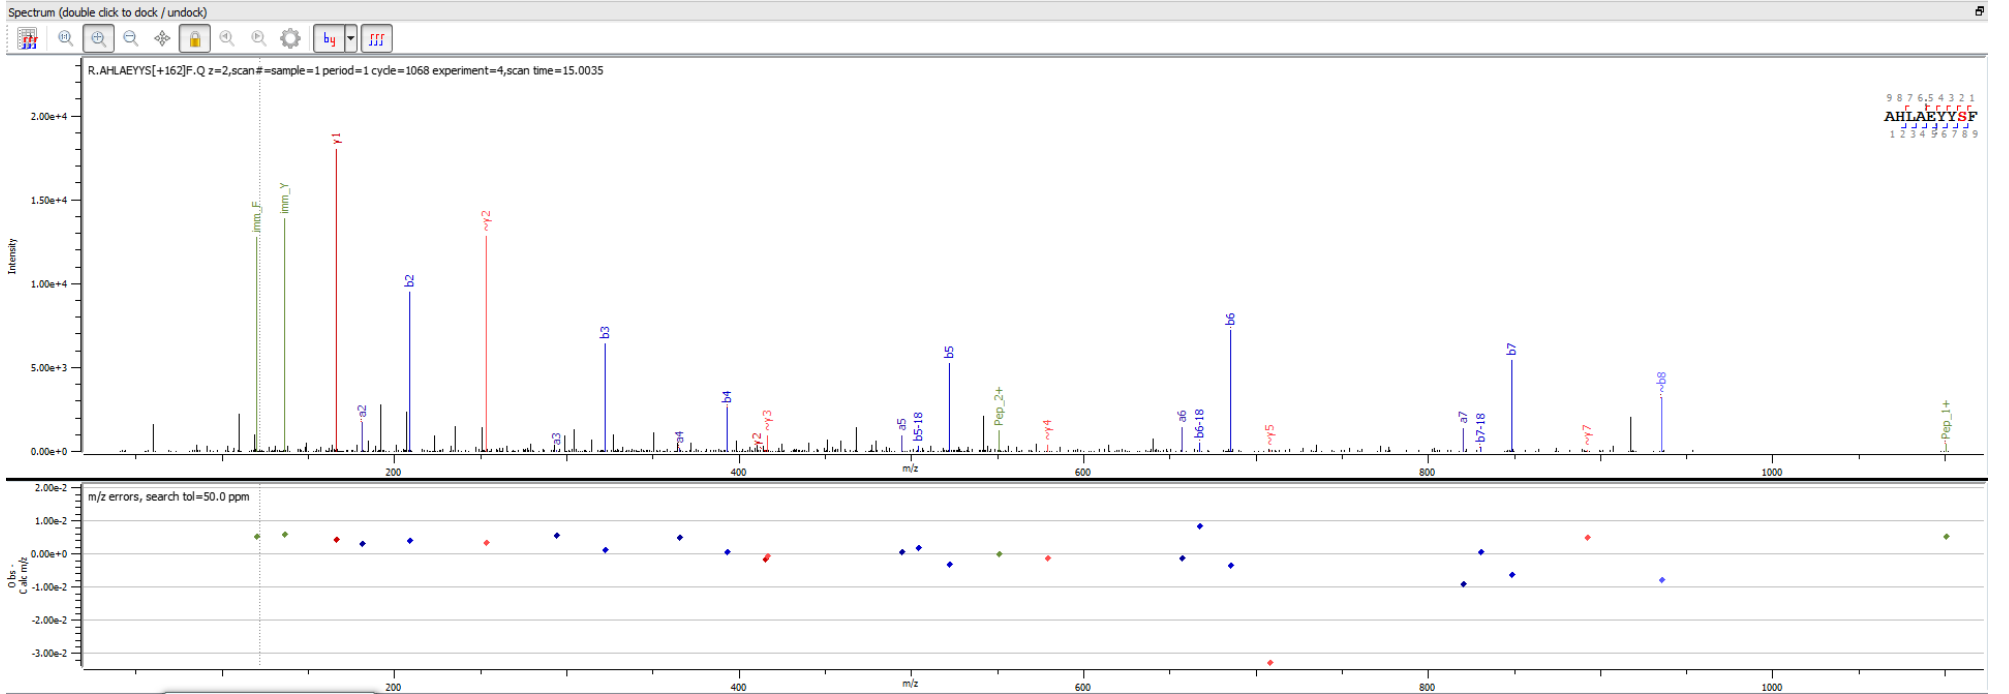

Sample S1 R.AHLAEYY[S]+162.053]F.Q

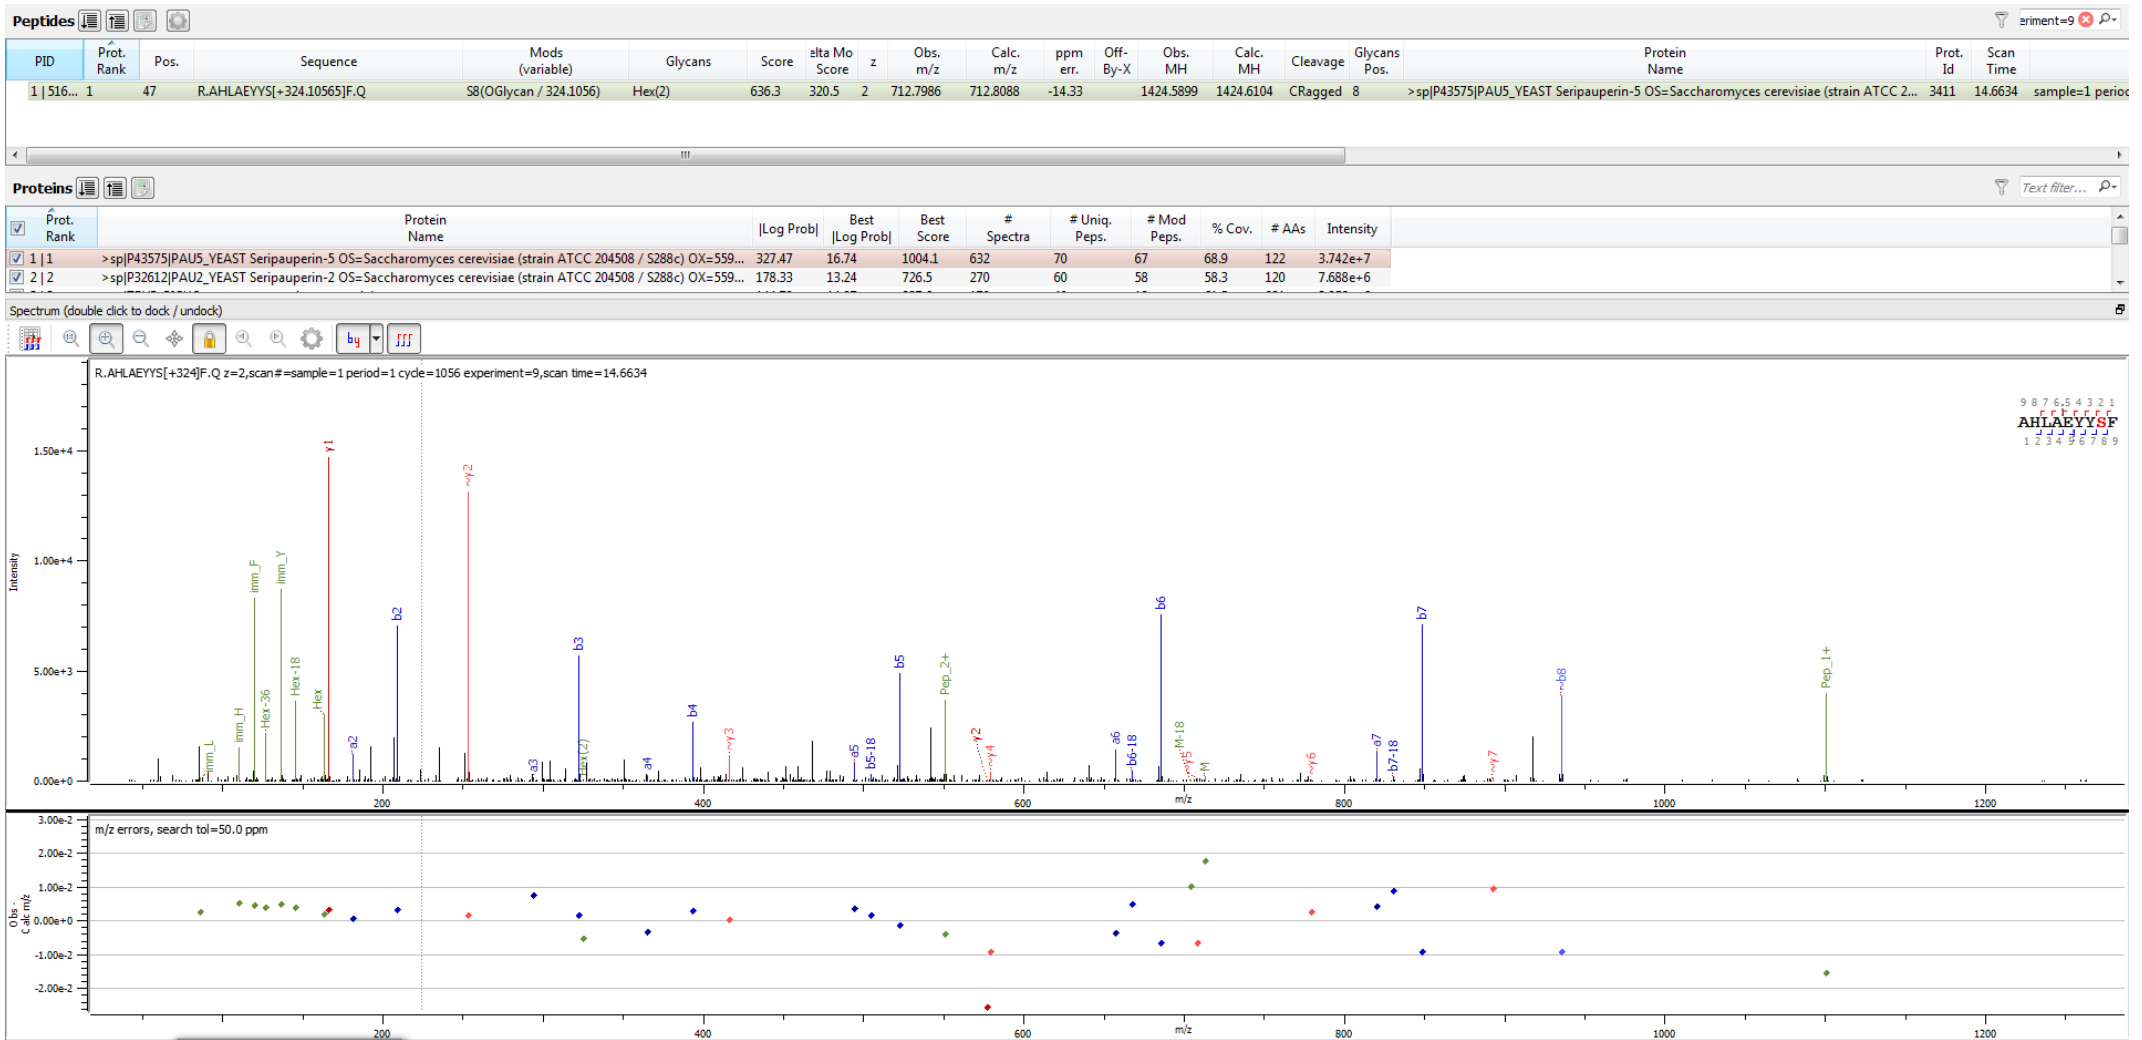

Sample S1 R.AHLAEYYS[+324.106]F.Q



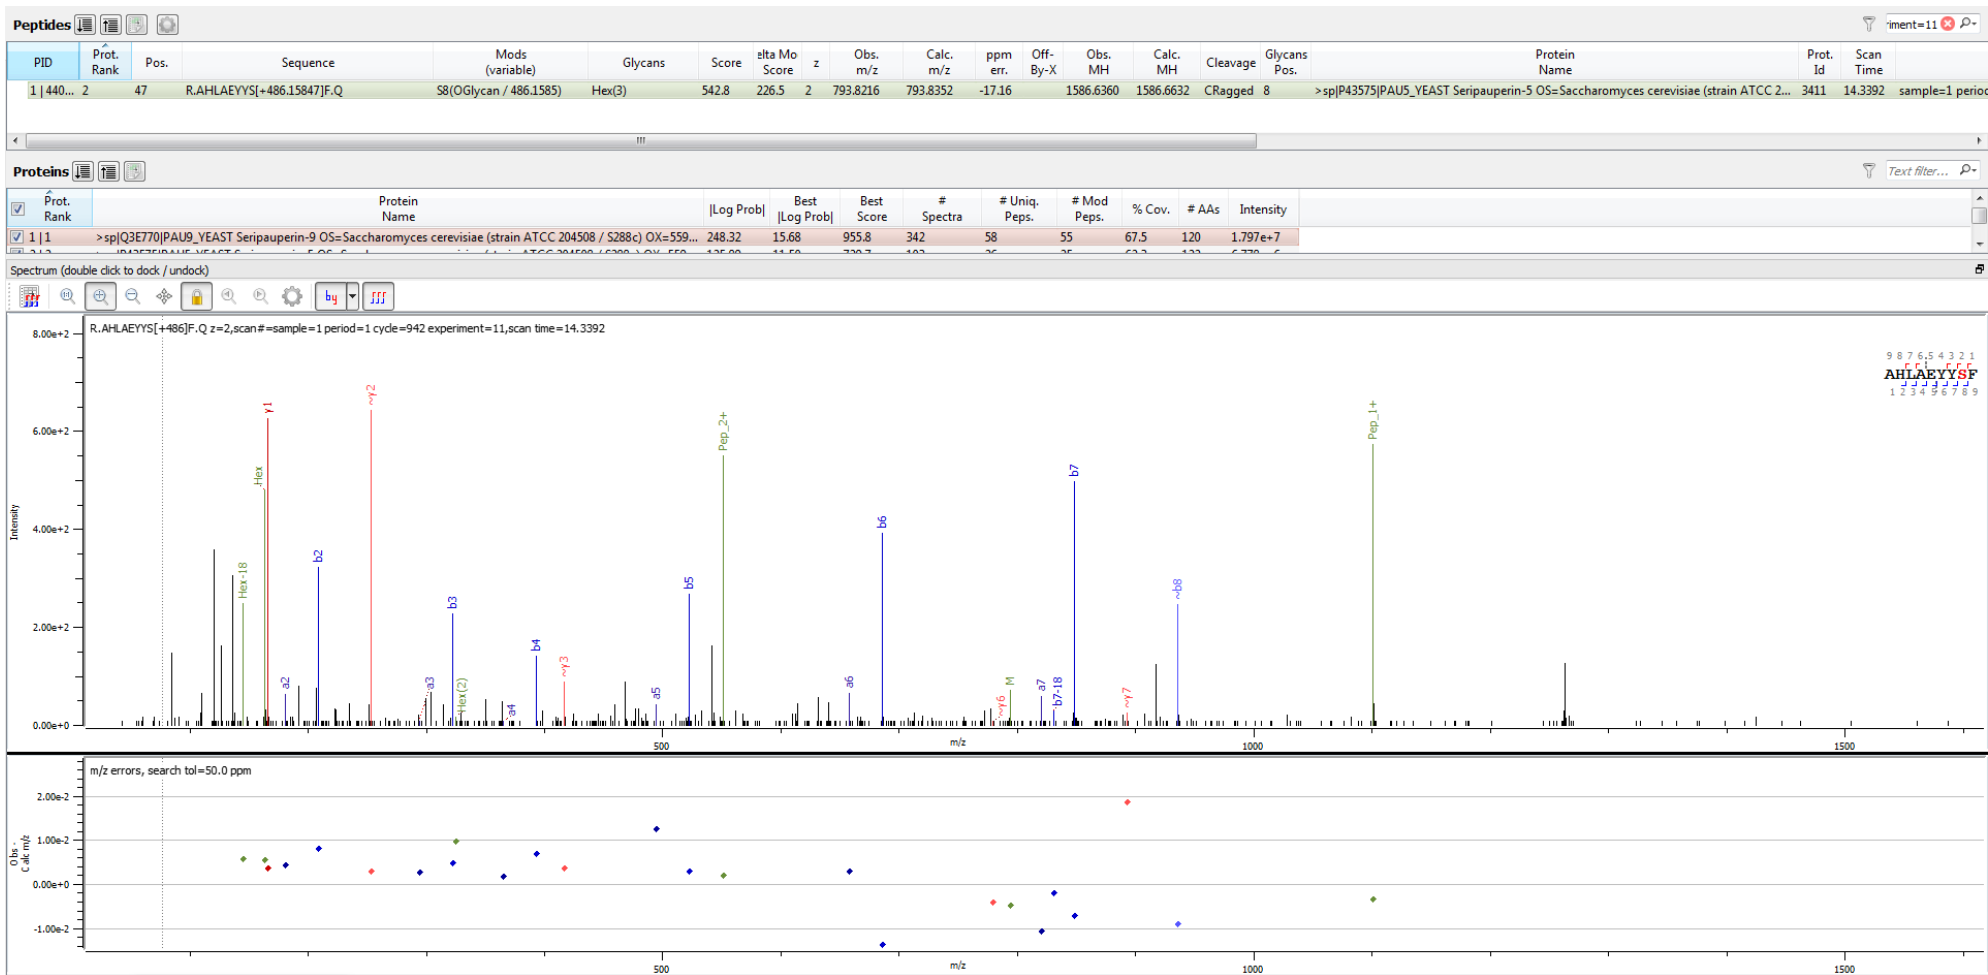

Sample S3 R.AHLAEYYS[+486.158]F.Q

| PID | Prot. Rank | Pos. | Sequence                  | Mods (variable)        | Glycans | Score | delta Mo Score | z | Obs. m/z | Calc. m/z | ppm err. | Off-By-X | Obs. MH   | Calc. MH  | Cleavage  | Glycans Pos. | Protein Name                                                                       | Prot. Id | Scan Time |
|-----|------------|------|---------------------------|------------------------|---------|-------|----------------|---|----------|-----------|----------|----------|-----------|-----------|-----------|--------------|------------------------------------------------------------------------------------|----------|-----------|
| 1   | 108...     | 1    | R.AHLAEYYS[+648.21129]F.Q | S8(Oglycan / 648.2113) | Hex(4)  | 451.9 | 184.4          | 2 | 874.8477 | 874.8616  | -16.00   |          | 1748.6880 | 1748.7160 | Cragged 8 |              | >sp P43575 PAU2_YEAST Seripauperin-5 OS=Saccharomyces cerevisiae (strain ATCC 2... | 3411     | 14.6684   |

| Prot. Rank | Protein Name                                                                                            | [Log Prob] | Best [Log Prob] | Best Score | # Spectra | # Uniq. Peps. | # Mod Peps. | % Cov. | # AAs | Intensity |
|------------|---------------------------------------------------------------------------------------------------------|------------|-----------------|------------|-----------|---------------|-------------|--------|-------|-----------|
| 1          | >sp P43575 PAU2_YEAST Seripauperin-5 OS=Saccharomyces cerevisiae (strain ATCC 204508 / S288c) OX=559... | 327.47     | 16.74           | 1004.1     | 632       | 70            | 67          | 68.9   | 122   | 3.742e+7  |
| 2          | >sp P32612 PAU2_YEAST Seripauperin-2 OS=Saccharomyces cerevisiae (strain ATCC 204508 / S288c) OX=559... | 178.33     | 13.24           | 726.5      | 270       | 60            | 58          | 58.3   | 120   | 7.688e+6  |

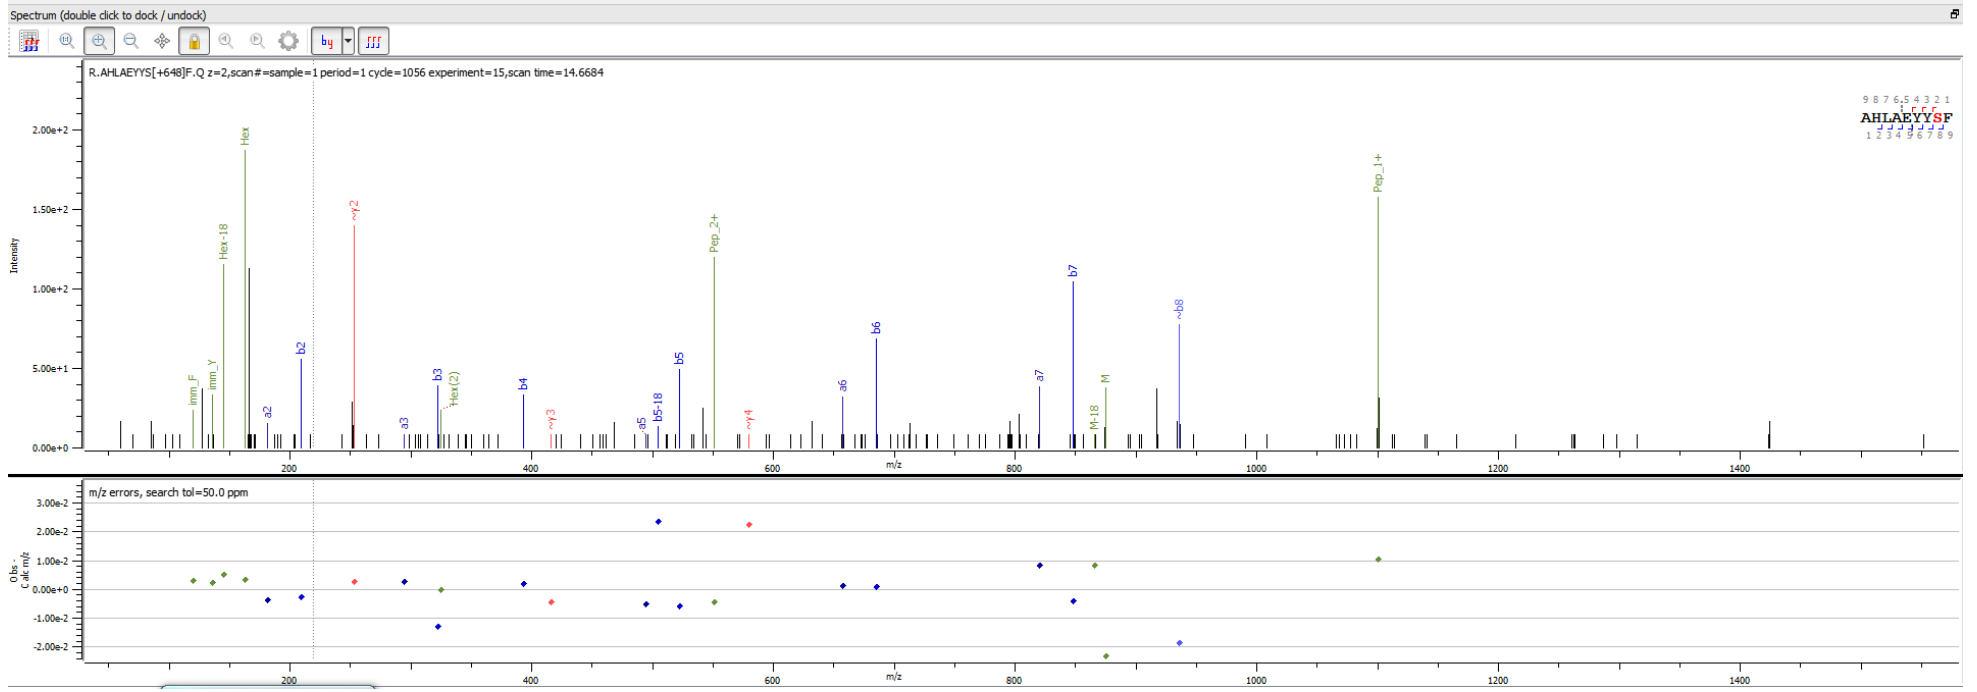

Sample S1 R.AHLAEYYS[+648.211]F.Q

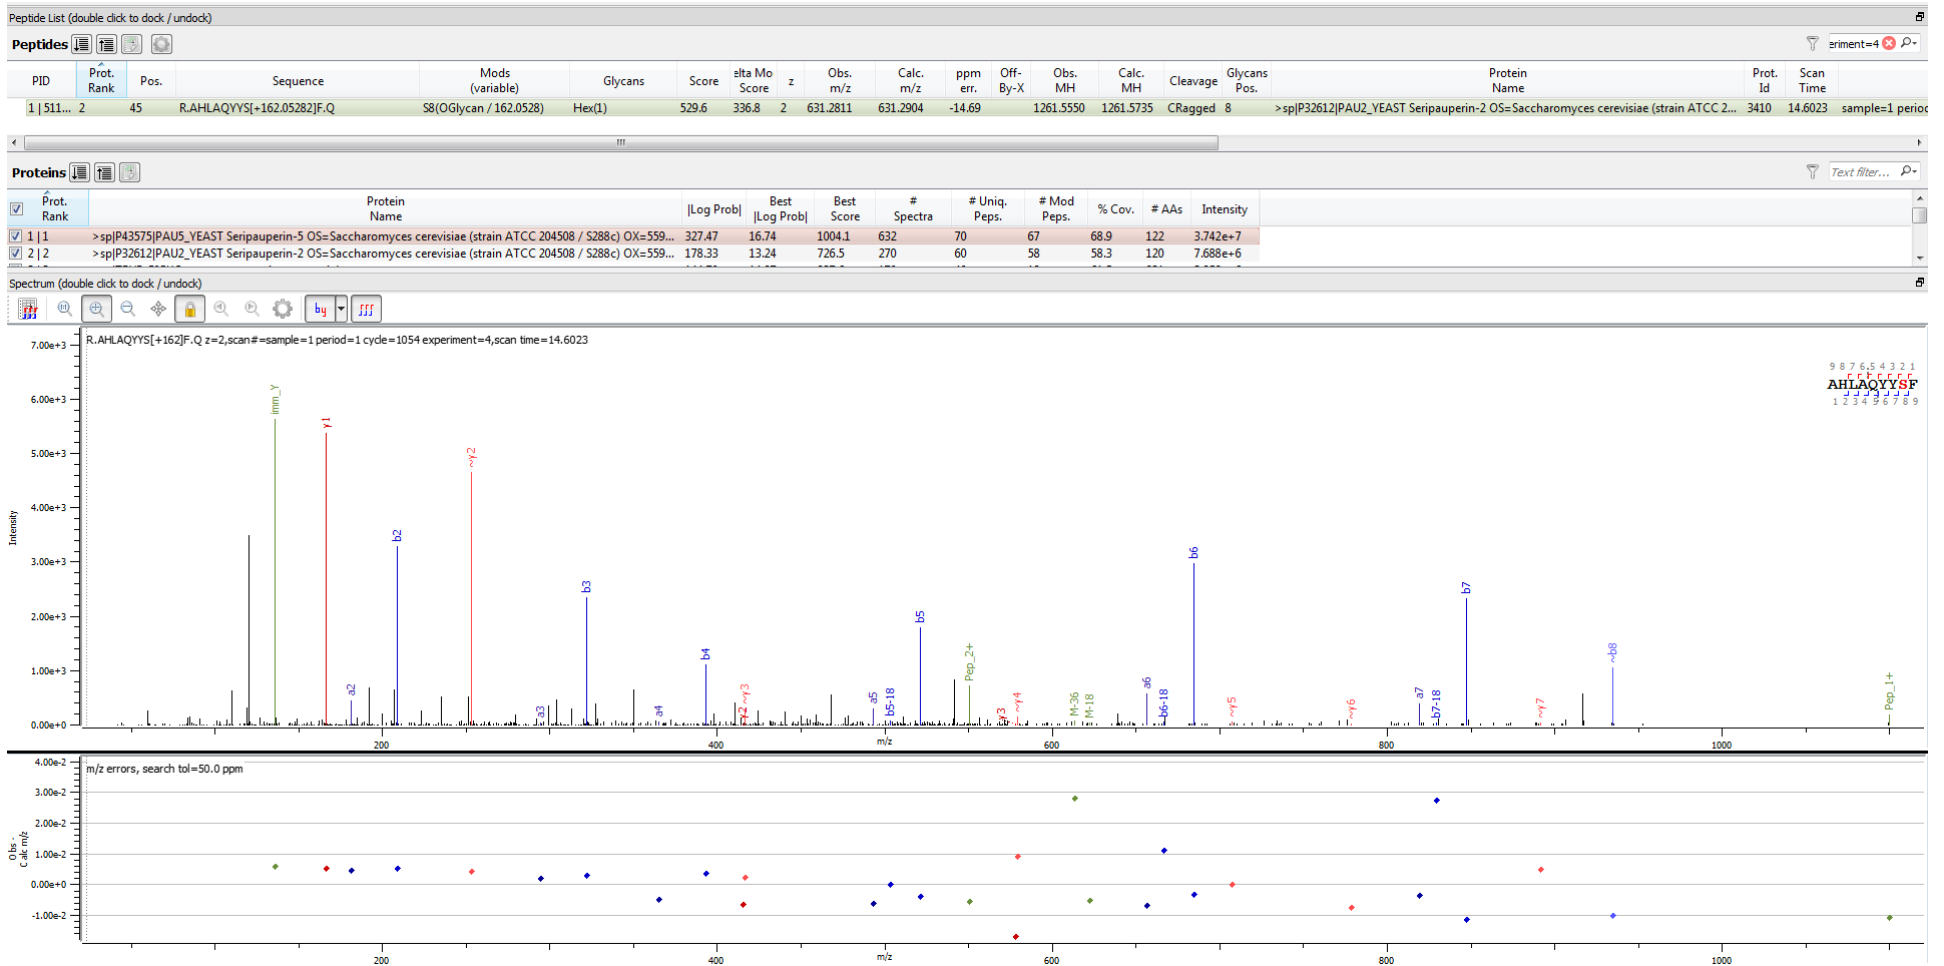

Sample S1 R.AHLAQYYS[+162.053]F.Q

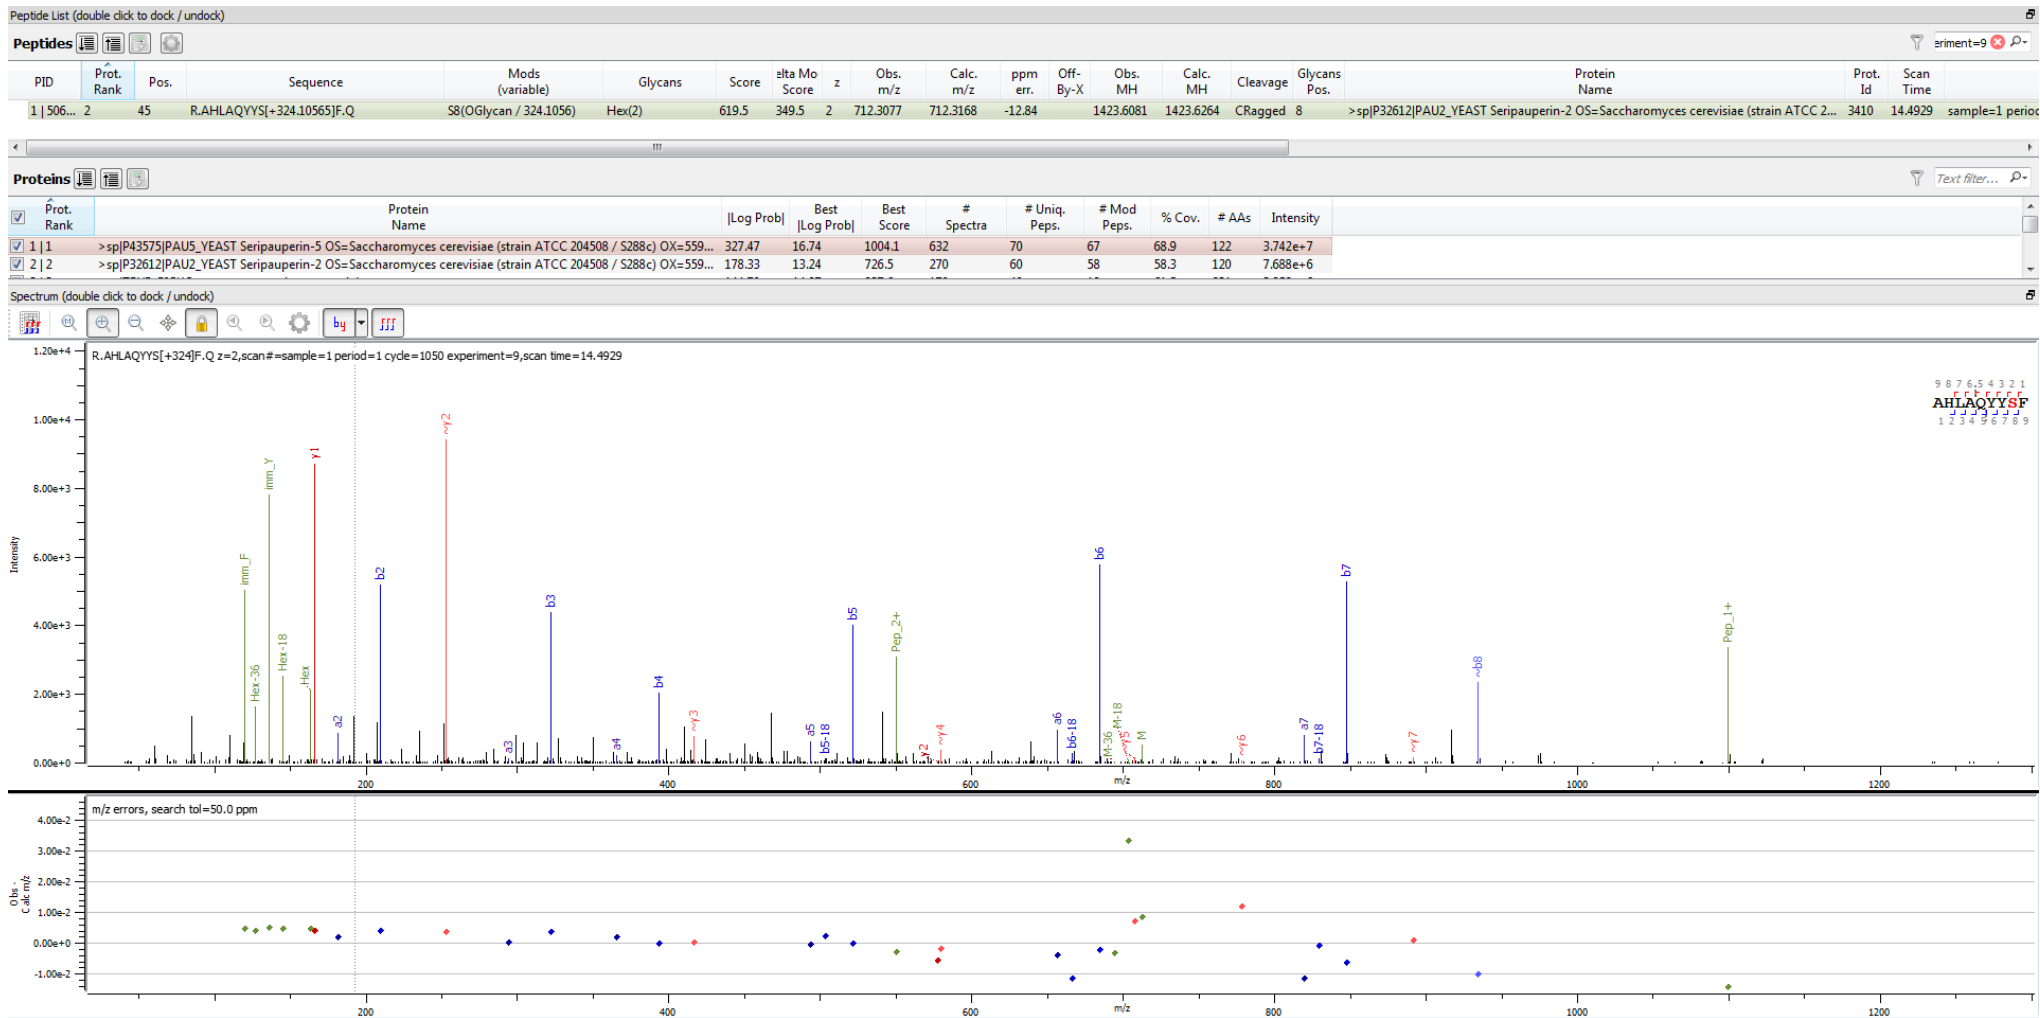

Sample S1 R.AHLAQYYS[+324.106]F.Q

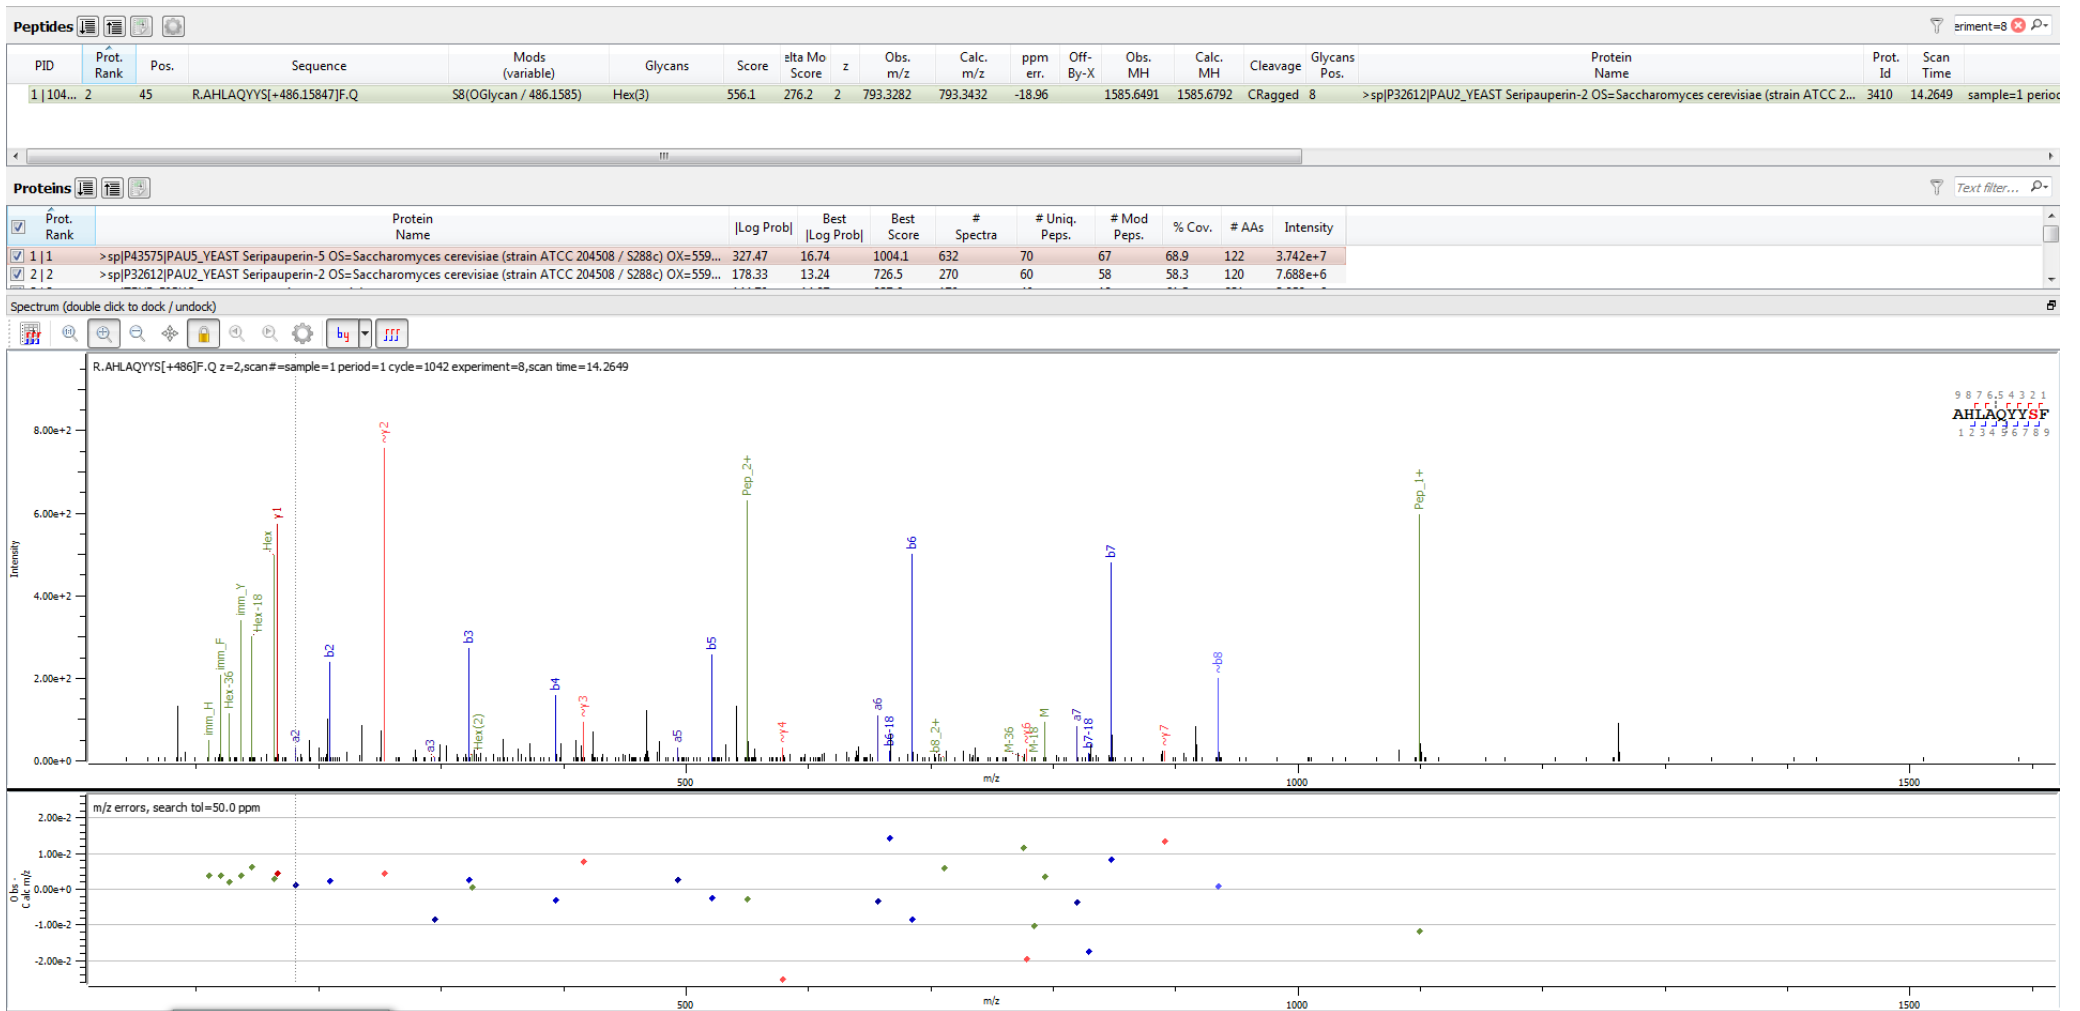

Sample S1 R.AHLAQYYIS[+486.158]F.Q

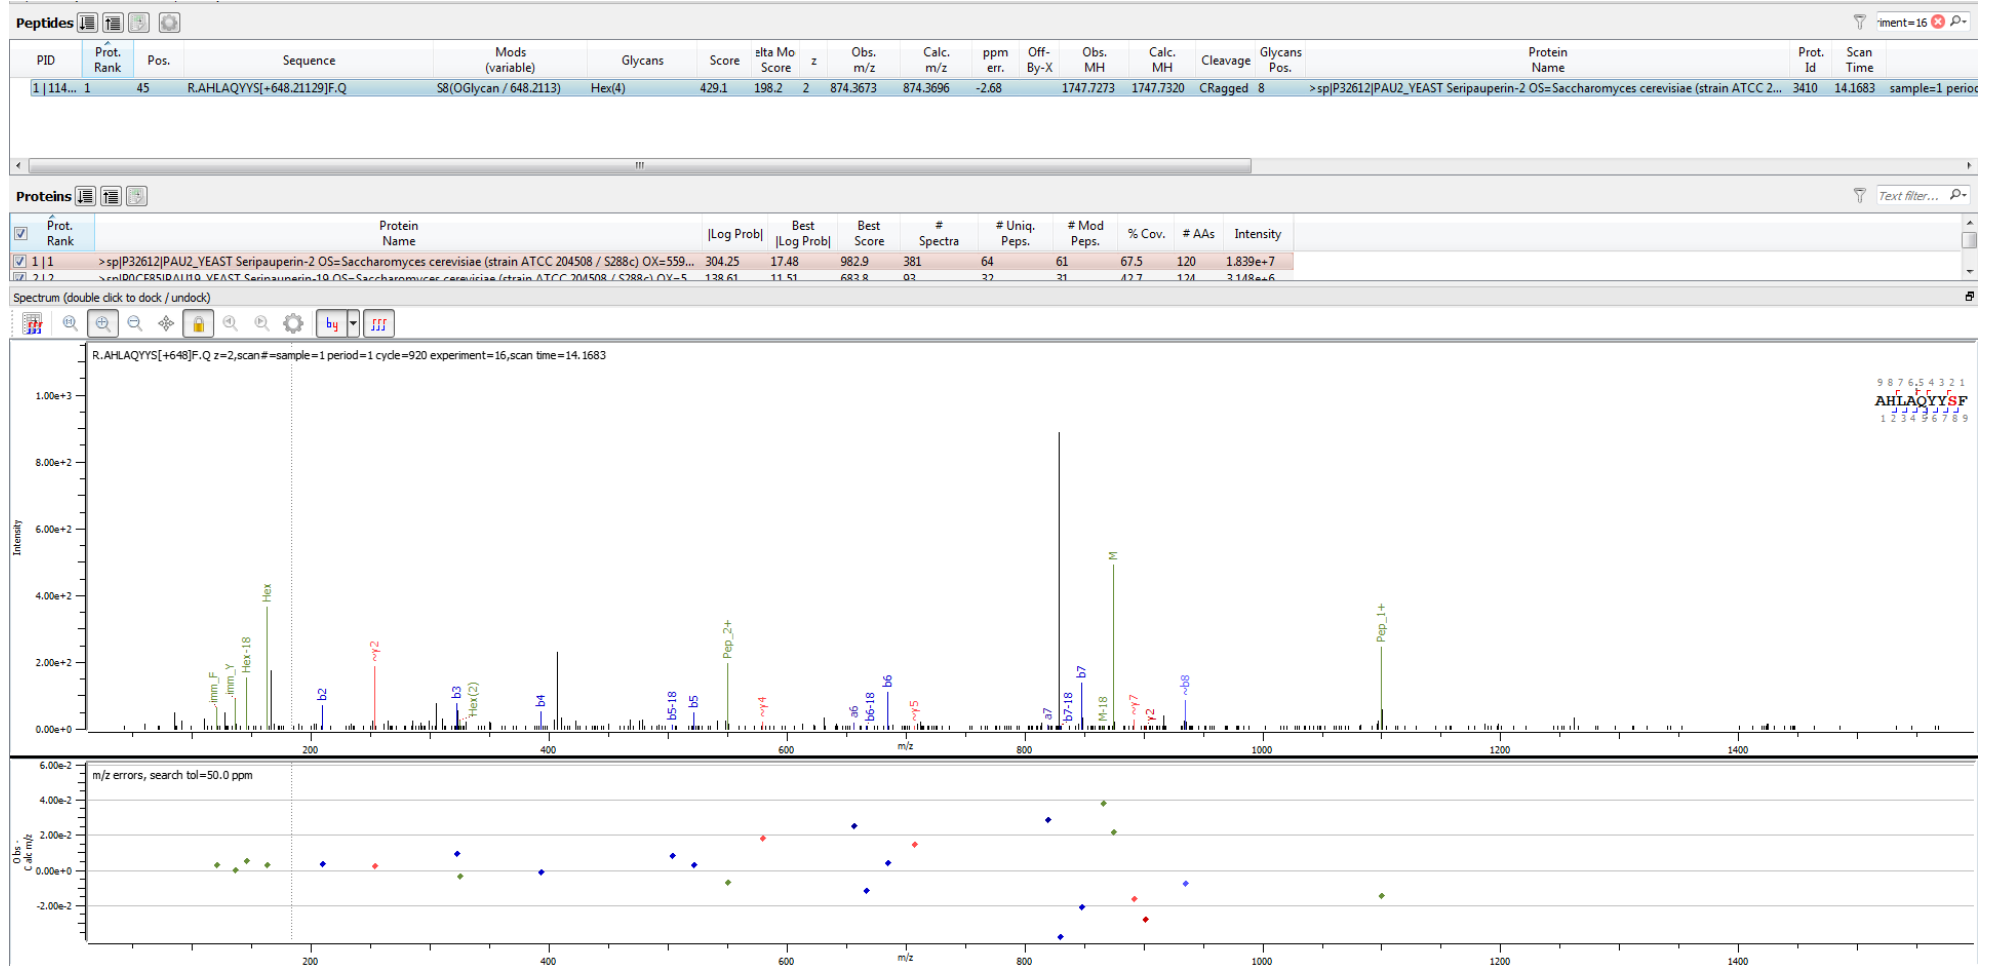

Sample S4 R.AHLAQYYIS[+648.211]F.Q

| PID | Prot. Rank | Pos. | Sequence | Mods (variable)             | Glycans                 | Score  | delta Mo Score | z   | Obs. m/z | Calc. m/z | ppm err. | Off-By-X | Obs. MH   | Calc. MH  | Cleavage | Glycans Pos. | Protein Name                                                                       | Prot. Id | Scan Time |
|-----|------------|------|----------|-----------------------------|-------------------------|--------|----------------|-----|----------|-----------|----------|----------|-----------|-----------|----------|--------------|------------------------------------------------------------------------------------|----------|-----------|
| 1   | 6483       | 1    | 102      | R.LKPAISSALS[+486.15847]K.D | S10(OGlycan / 486.1585) | Hex(3) | 468.1          | 0.0 | 2        | 800.9109  | 800.9244 | -16.89   | 1600.8144 | 1600.8415 | Specific | 10           | >sp Q3E770 PAU9_YEAST Seripauperin-9 OS=Saccharomyces cerevisiae (strain ATCC 2... | 3461     | 10.6253   |

| Prot. Rank | Protein Name                                                                                            | [Log Prob] | Best [Log Prob] | Best Score | # Spectra | # Uniq. Peps. | # Mod Peps. | % Cov. | # AAs | Intensity |
|------------|---------------------------------------------------------------------------------------------------------|------------|-----------------|------------|-----------|---------------|-------------|--------|-------|-----------|
| 1          | >sp Q3E770 PAU9_YEAST Seripauperin-9 OS=Saccharomyces cerevisiae (strain ATCC 204508 / S288c) OX=559... | 248.32     | 15.68           | 955.8      | 342       | 58            | 55          | 67.5   | 120   | 1.797e+7  |

Spectrum (double click to dock / undock)

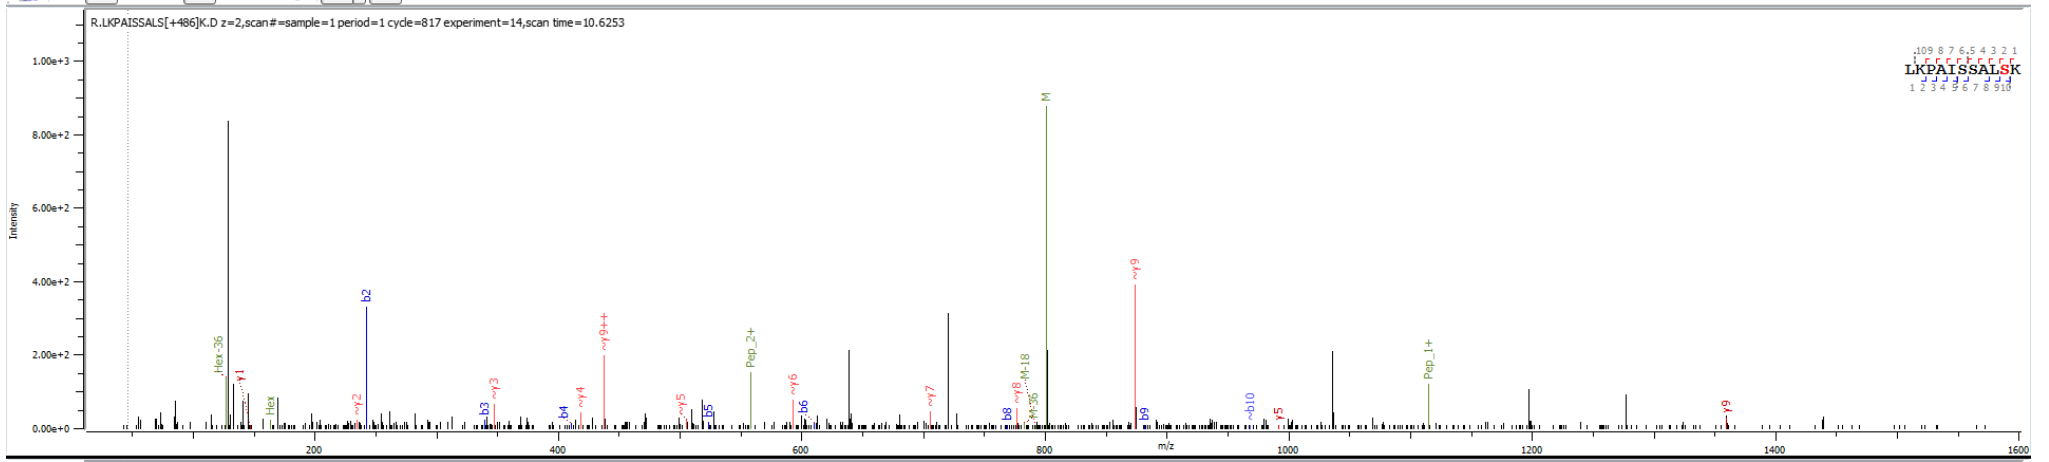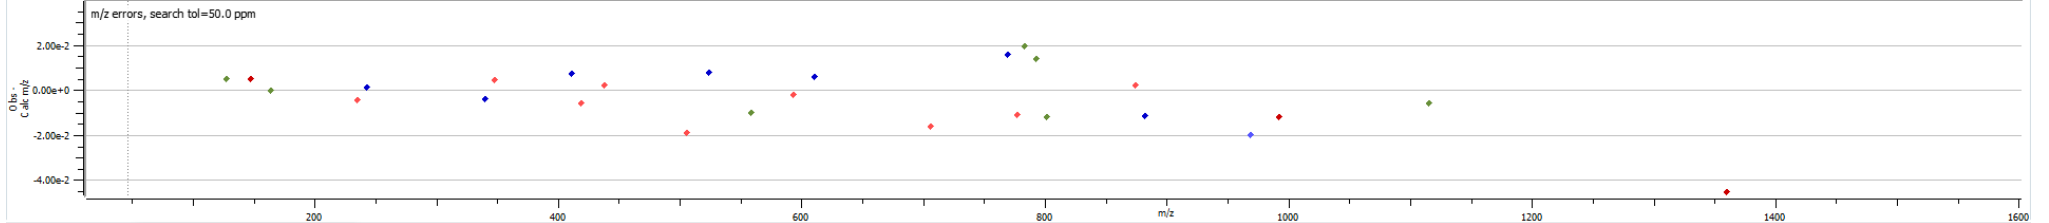

Sample S3 R.LKPAISSALS[+486.158]K.D

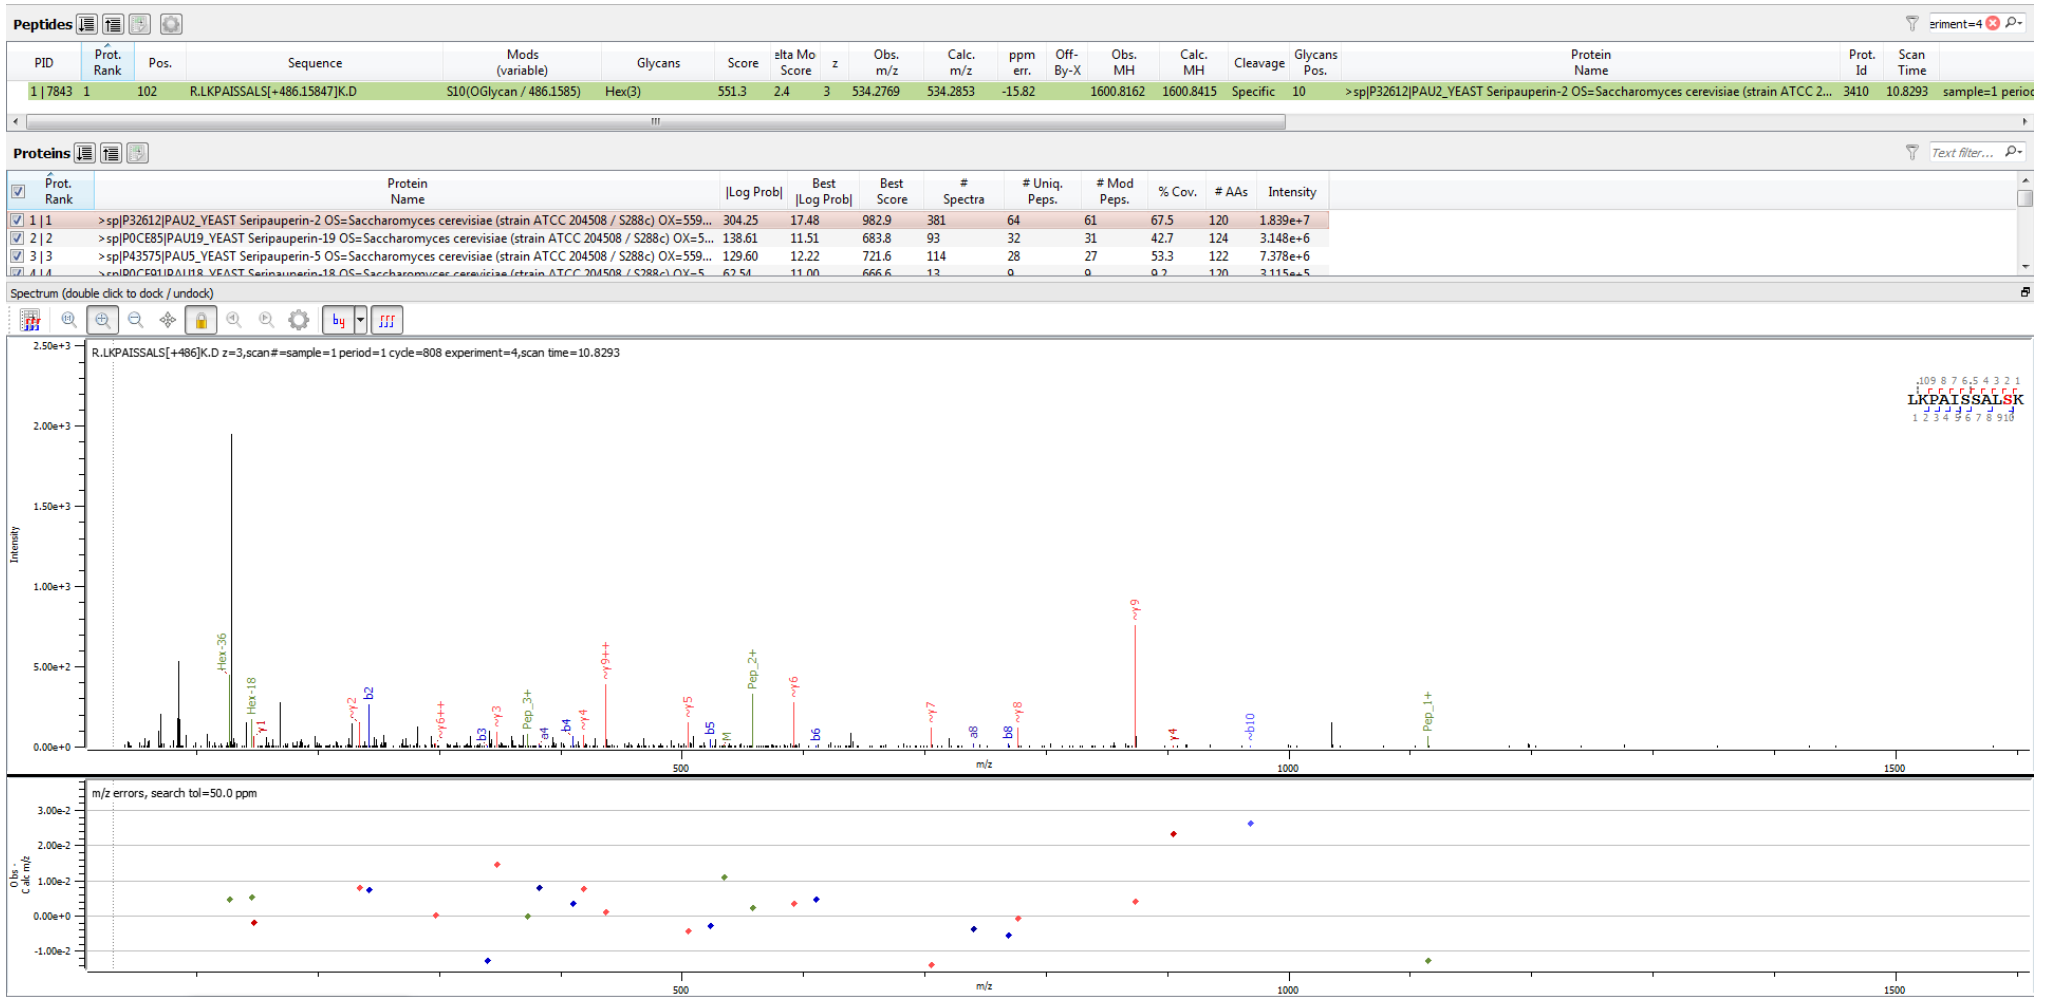

Sample S4 R.LKPAISSALS[+486.158]K.D



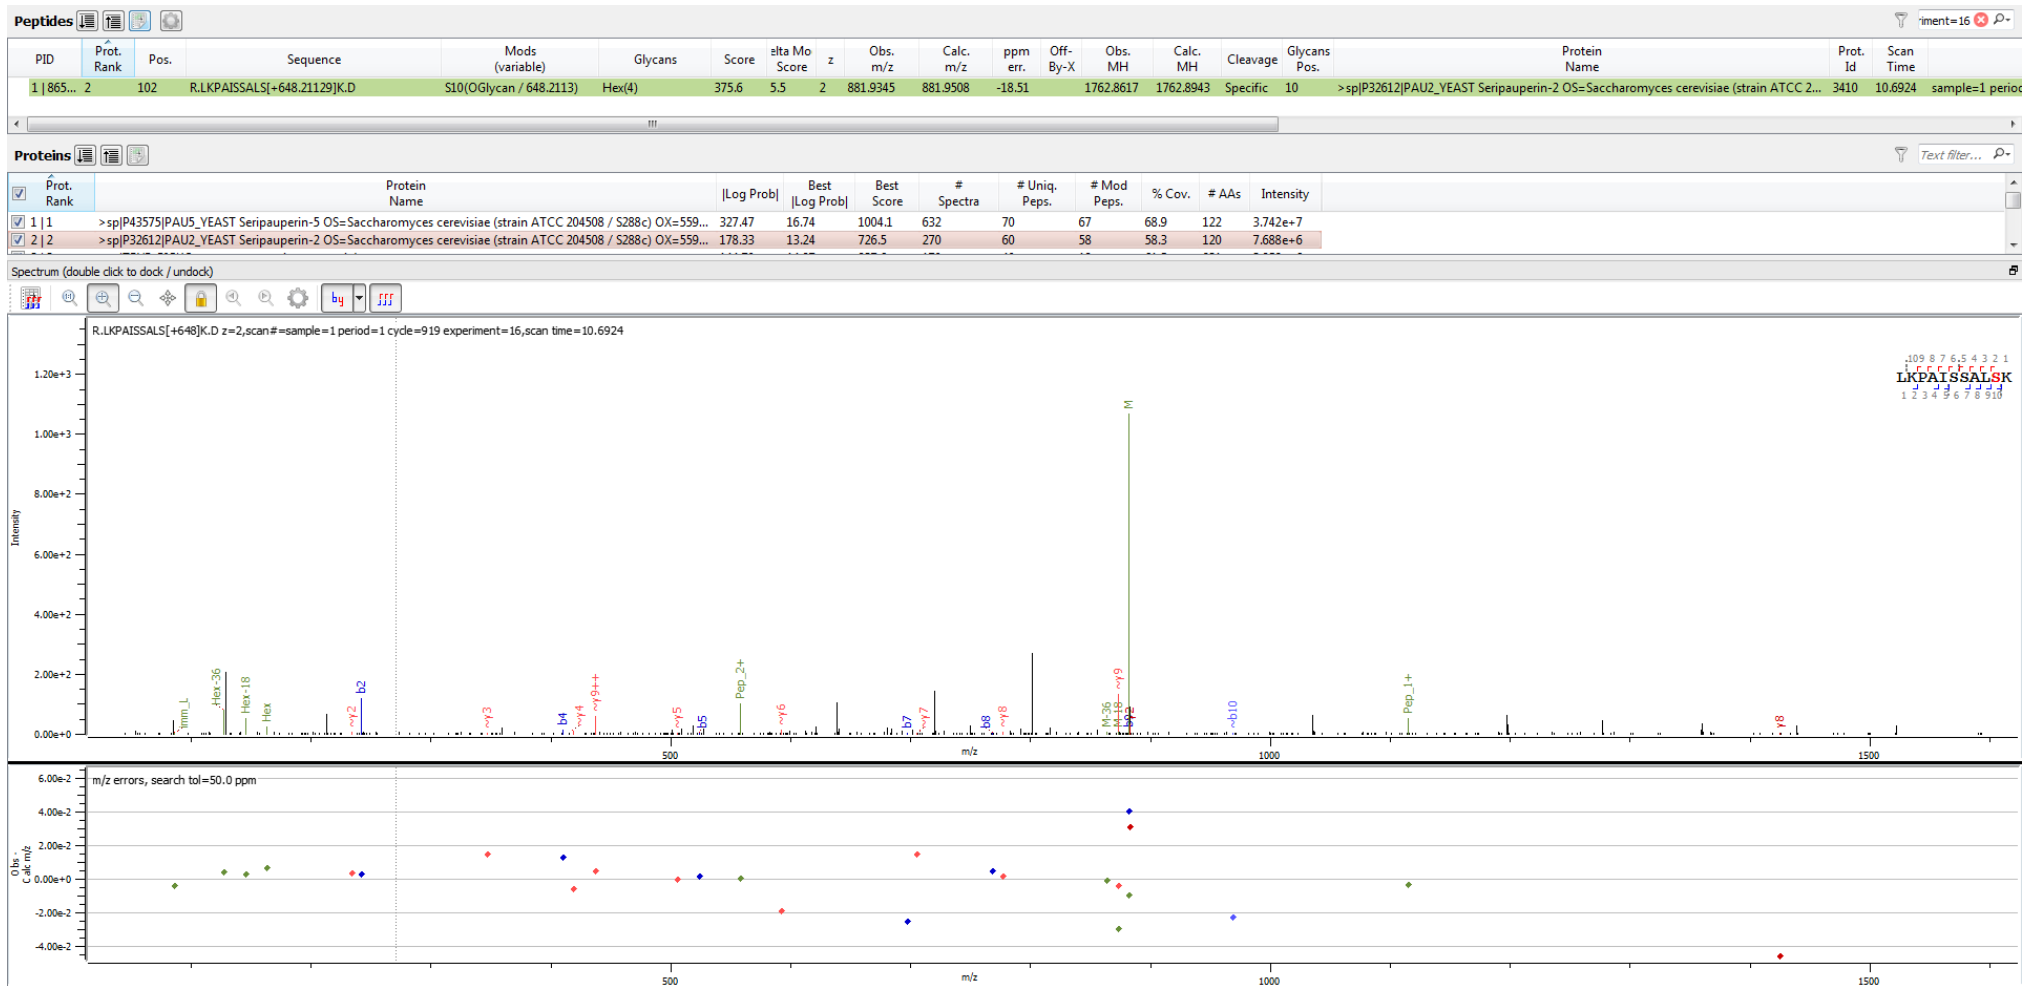

Sample S1 R.LKPAISSALS[+648.211]K.D

| PID | Prot. Rank | Pos. | Sequence | Mods (variable)             | Glycans                | Score  | delta Mo Score | z   | Obs. m/z | Calc. m/z | ppm err. | Off-By-X | Obs. MH   | Calc. MH  | Cleavage | Glycans Pos. | Protein Name                                                                       | Prot. Id | Scan Time |                     |
|-----|------------|------|----------|-----------------------------|------------------------|--------|----------------|-----|----------|-----------|----------|----------|-----------|-----------|----------|--------------|------------------------------------------------------------------------------------|----------|-----------|---------------------|
| 1   | 2290       | 1    | 102      | R.LKPAISS[+648.21129]ALSK.D | S7(OGlycan / 648.2113) | Hex(4) | 485.6          | 0.0 | 3        | 588.2979  | 588.3030 | -8.60    | 1762.8791 | 1762.8943 | Specific | 7            | >sp Q3E770 PAU9_YEAST Seripauperin-9 OS=Saccharomyces cerevisiae (strain ATCC 2... | 3461     | 10.5024   | sample=1 period=... |

| Prot. Rank | Protein Name                                                                                            | [Log Prob] | Best [Log Prob] | Best Score | # Spectra | # Uniq. Peps. | # Mod Peps. | % Cov. | # AAs | Intensity |
|------------|---------------------------------------------------------------------------------------------------------|------------|-----------------|------------|-----------|---------------|-------------|--------|-------|-----------|
| 1          | >sp Q3E770 PAU9_YEAST Seripauperin-9 OS=Saccharomyces cerevisiae (strain ATCC 204508 / S288c) OX=559... | 288.60     | 16.66           | 988.6      | 452       | 61            | 56          | 60.8   | 120   | 1.023e+7  |
| 2          | >sp Q07987 PAU23_YEAST Seripauperin-23 OS=Saccharomyces cerevisiae (strain ATCC 204508 / S288c) OX=5... | 160.38     | 13.28           | 718.6      | 124       | 39            | 36          | 43.5   | 124   | 2.323e+6  |
| 3          | >sp P43575 PAU5_YEAST Seripauperin-5 OS=Saccharomyces cerevisiae (strain ATCC 204508 / S288c) OX=559... | 142.55     | 14.15           | 737.1      | 167       | 35            | 33          | 42.6   | 122   | 6.136e+6  |

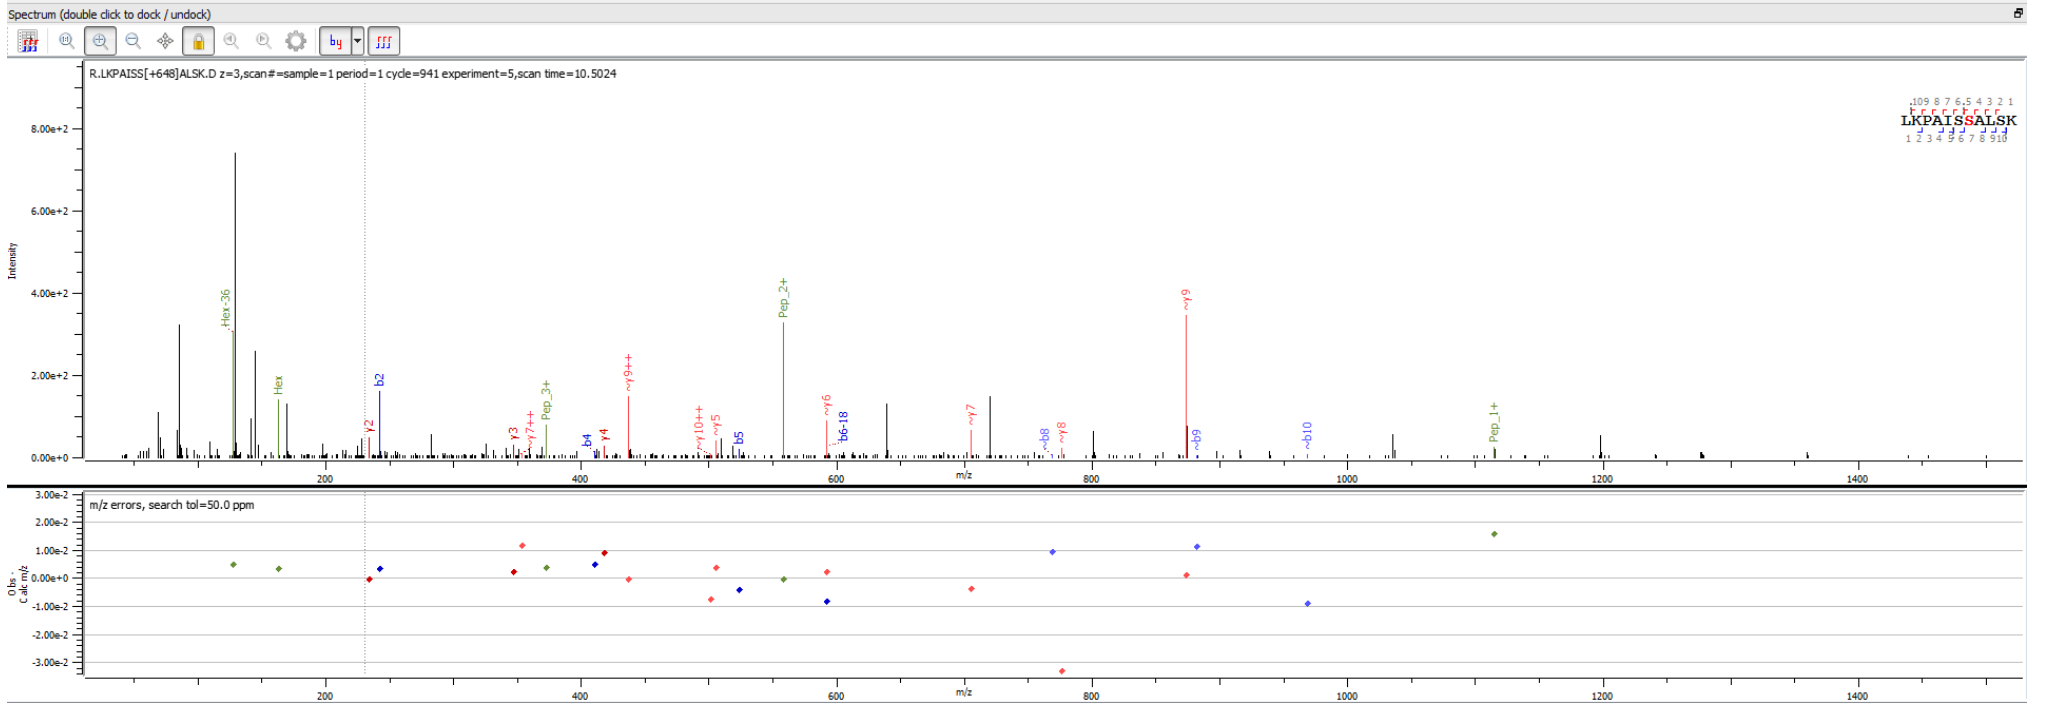

Sample S6 R.LKPAISS[+648.211]ALSK.D

| PID | Prot. Rank | Pos. | Sequence                    | Mods (variable)        | Glycans | Score | alta Mo Score | z | Obs. m/z | Calc. m/z | ppm err. | Off-By-X | Obs. MH   | Calc. MH  | Cleavage | Glycans Pos. | Protein Name                                                                       | Prot. Id | Scan Time |
|-----|------------|------|-----------------------------|------------------------|---------|-------|---------------|---|----------|-----------|----------|----------|-----------|-----------|----------|--------------|------------------------------------------------------------------------------------|----------|-----------|
| 1   | 1          | 102  | R.LKPAIS[+810.26412]SALSK.D | S6(OGlycan / 810.2641) | Hex(5)  | 397.6 | 6.6           | 2 | 962.9589 | 962.9772  | -18.96   |          | 1924.9106 | 1924.9471 | Specific | 6            | >sp P32612 PAU2_YEAST Seripauperin-2 OS=Saccharomyces cerevisiae (strain ATCC 2... | 3410     | 10.0036   |

| Prot. Rank | Protein Name                                                                                            | [Log Prob] | Best [Log Prob] | Best Score | # Spectra | # Uniq. Peps. | # Mod Peps. | % Cov. | # AAs | Intensity |
|------------|---------------------------------------------------------------------------------------------------------|------------|-----------------|------------|-----------|---------------|-------------|--------|-------|-----------|
| 1          | >sp P32612 PAU2_YEAST Seripauperin-2 OS=Saccharomyces cerevisiae (strain ATCC 204508 / S288c) OX=559... | 304.25     | 17.48           | 982.9      | 381       | 64            | 61          | 67.5   | 120   | 1.839e+7  |
| 2          | >sp P32612 PAU2_YEAST Seripauperin-2 OS=Saccharomyces cerevisiae (strain ATCC 204508 / S288c) OX=559... | 138.61     | 11.51           | 683.8      | 02        | 32            | 31          | 42.7   | 124   | 2.148e+6  |

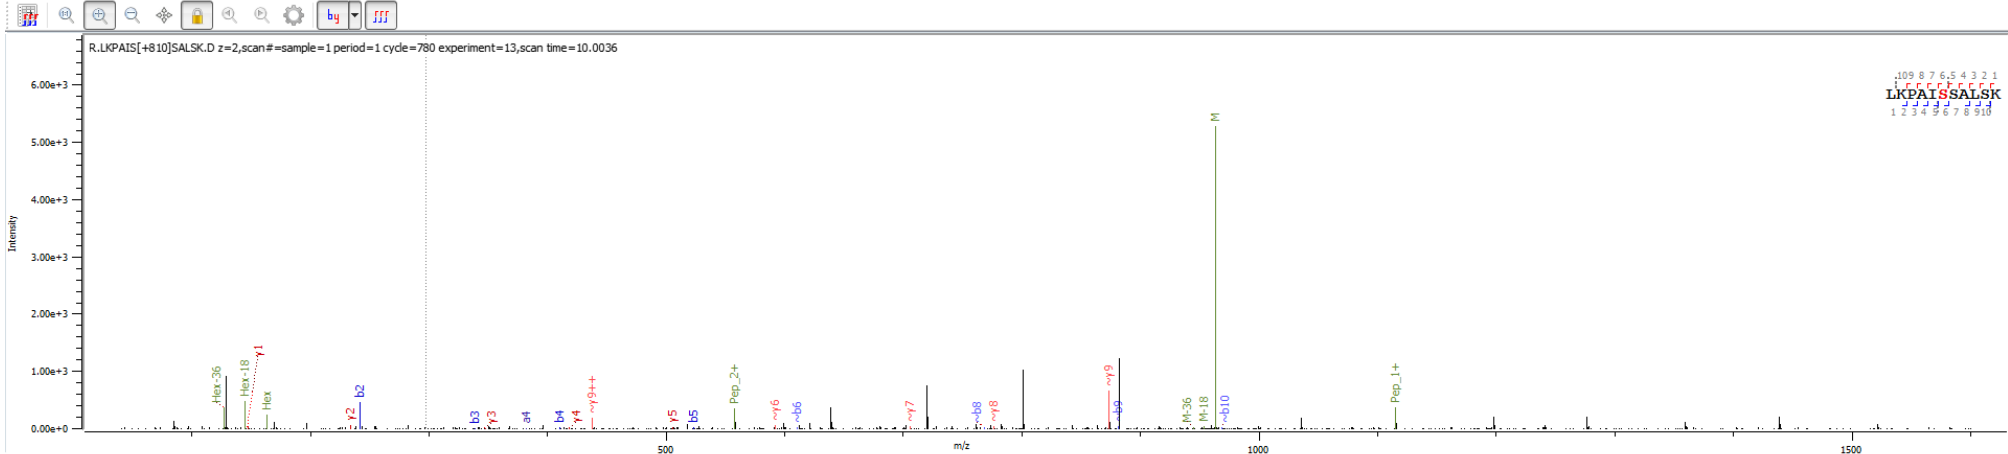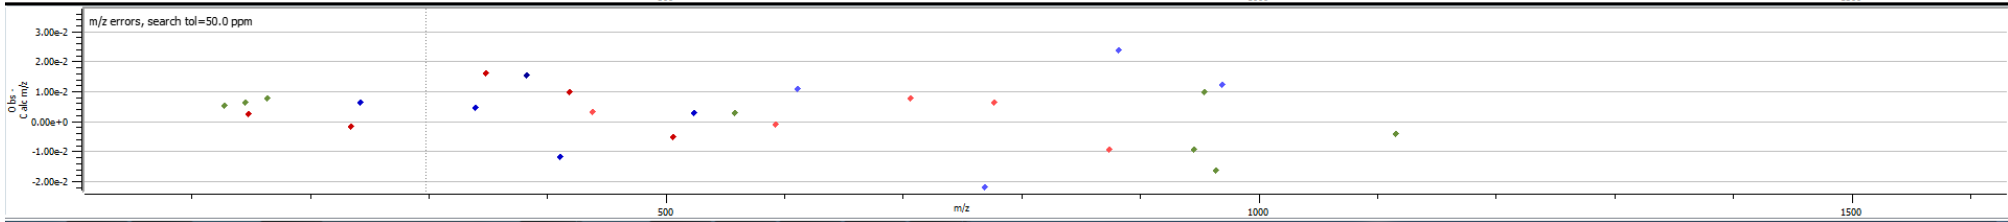

Sample S1 R.LKPAIS[+810.264]SALSK.D

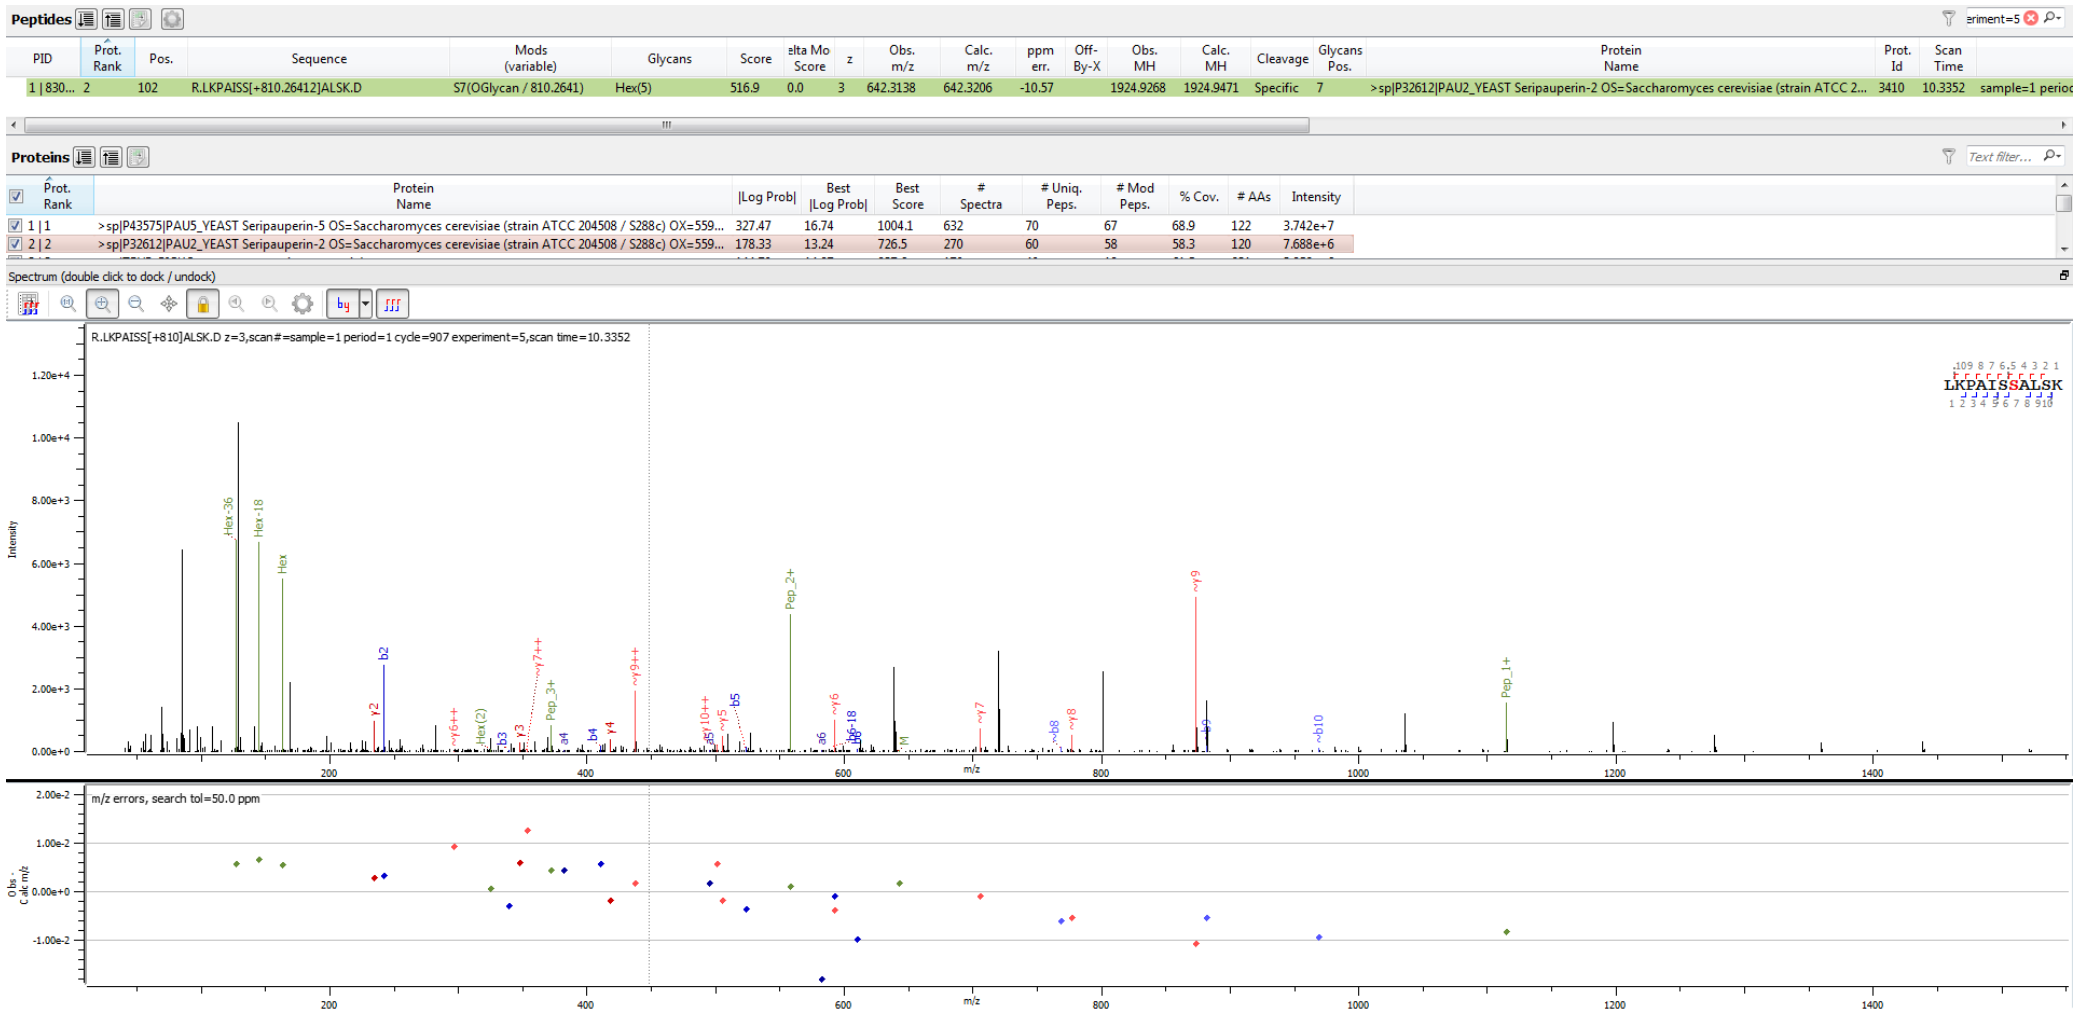

Sample S1 R.LKPAISS[+810.264]ALSK.D

| PID        | Prot. Rank | Pos. | Sequence                    | Mods (variable)        | Glycans | Score | delta Mo Score | z | Obs. m/z  | Calc. m/z | ppm err. | Off-By-X | Obs. MH   | Calc. MH  | Cleavage | Glycans Pos. | Protein Name                                                                       | Prot. Id | Scan Time               |
|------------|------------|------|-----------------------------|------------------------|---------|-------|----------------|---|-----------|-----------|----------|----------|-----------|-----------|----------|--------------|------------------------------------------------------------------------------------|----------|-------------------------|
| 1   893... | 1          | 102  | R.LKPAISS[+972.31694]ALSK.D | S7(OGlycan / 972.3169) | Hex(6)  | 404.6 | 1.2            | 2 | 1043.9853 | 1044.0036 | -17.57   |          | 2086.9633 | 2087.0000 | Specific | 7            | >sp P32612 PAU2_YEAST Seripauperin-2 OS=Saccharomyces cerevisiae (strain ATCC 2... | 3410     | 10.1262 sample=1 period |

| Prot. Rank | Protein Name                                                                                            | [Log Prob] | Best [Log Prob] | Best Score | # Spectra | # Uniq. Peps. | # Mod Peps. | % Cov. | # AAs | Intensity |
|------------|---------------------------------------------------------------------------------------------------------|------------|-----------------|------------|-----------|---------------|-------------|--------|-------|-----------|
| 1   1      | >sp P32612 PAU2_YEAST Seripauperin-2 OS=Saccharomyces cerevisiae (strain ATCC 204508 / S288c) OX=559... | 304.25     | 17.48           | 982.9      | 381       | 64            | 61          | 67.5   | 120   | 1.839e+7  |
| 2   2      | >sp P32612 PAU2_YEAST Seripauperin-2 OS=Saccharomyces cerevisiae (strain ATCC 204508 / S288c) OX=559... | 138.61     | 11.51           | 683.8      | 92        | 32            | 31          | 42.7   | 174   | 3.148e+6  |

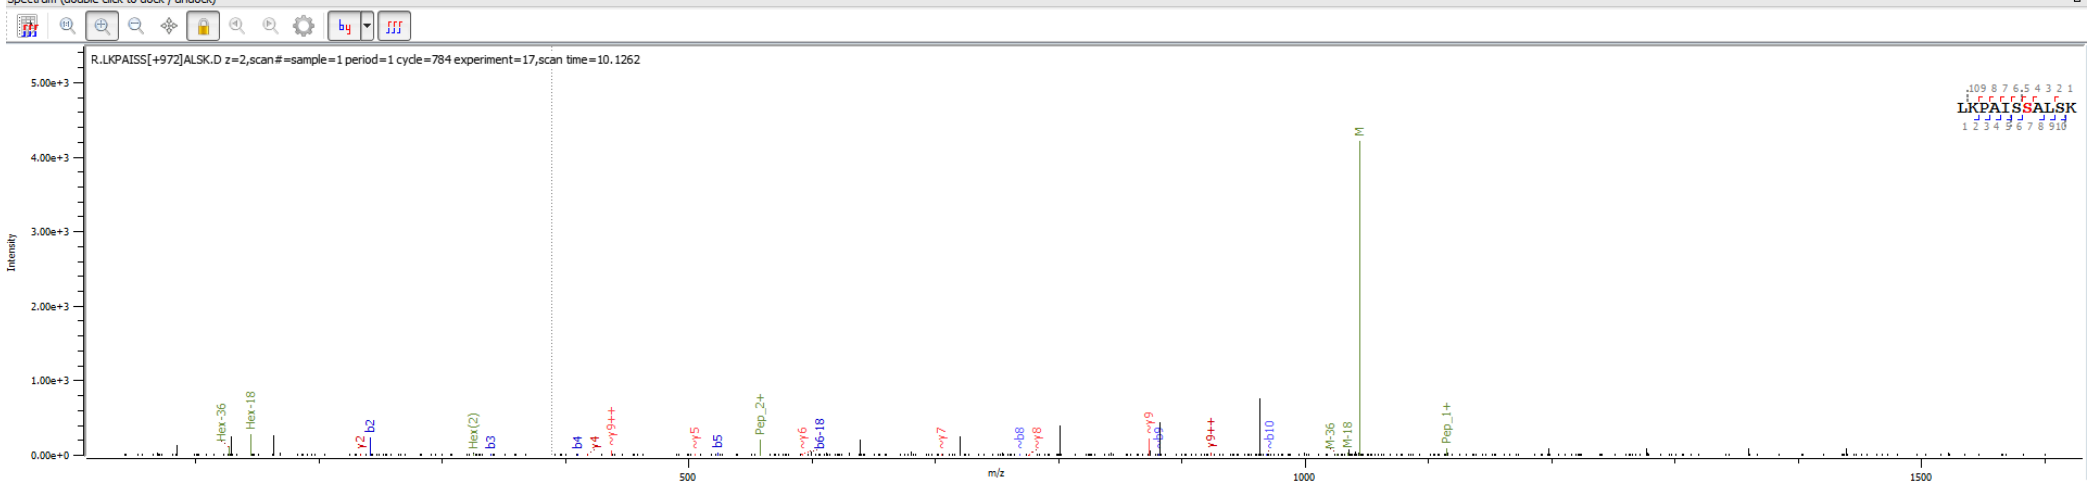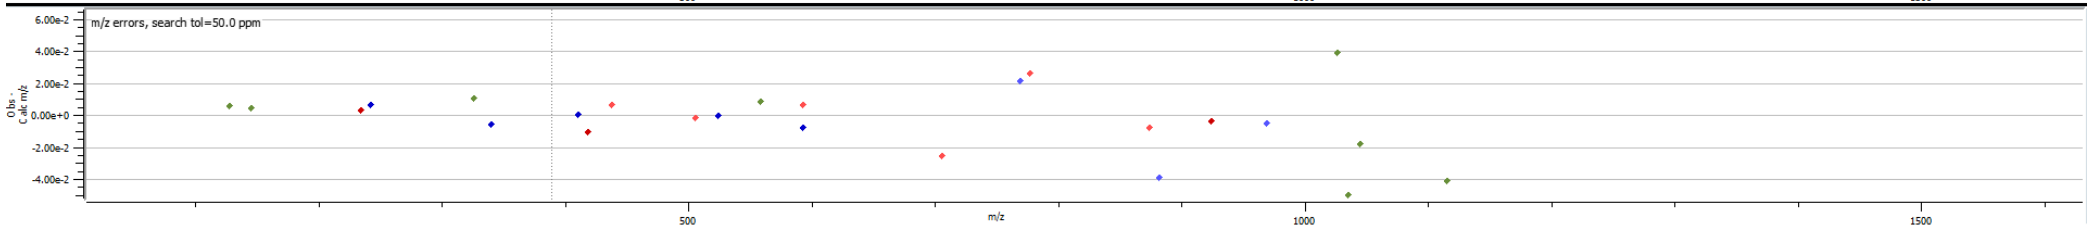

Sample S4 R.LKPAISS[+972.317]ALSK.D

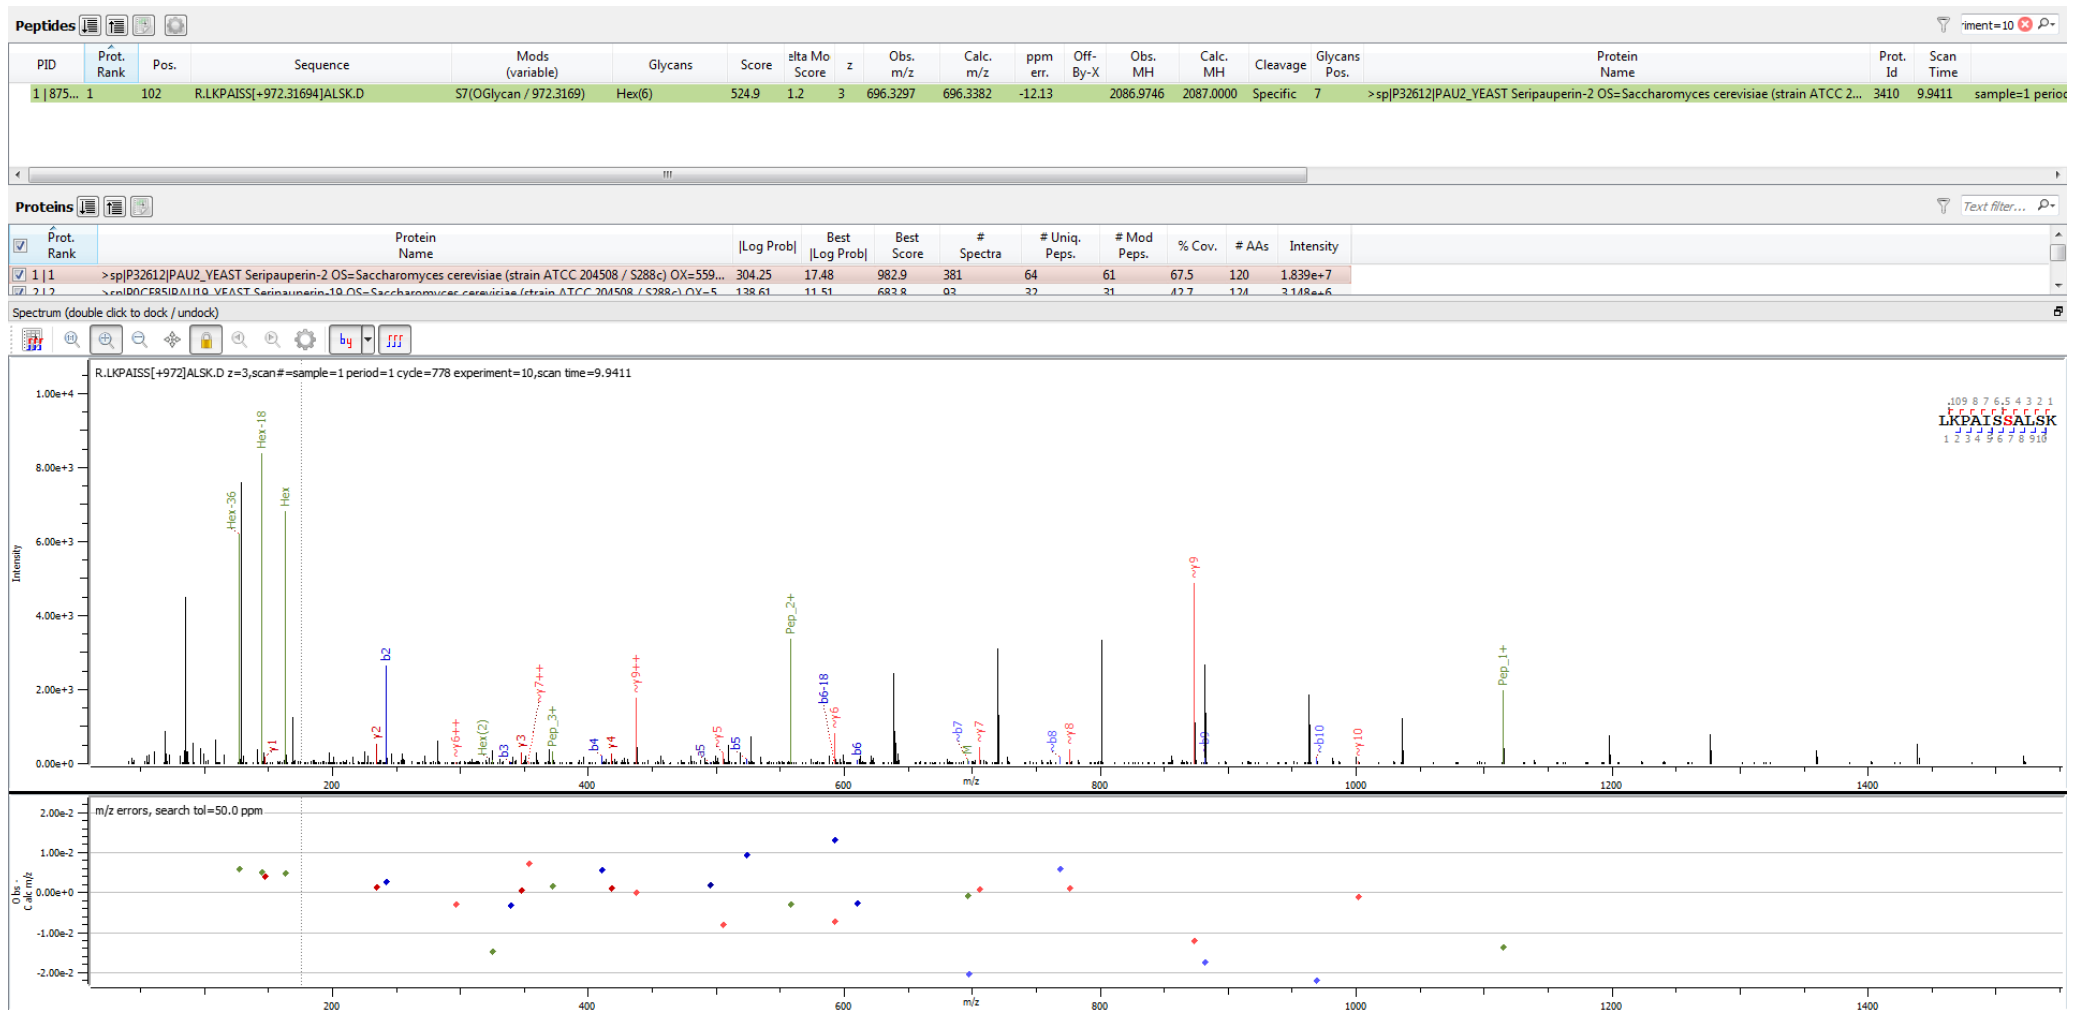

Sample S4 R.LKPAISS[+972.317]ALSK.D

**Peptides** iment=13

| PID | Prot. Rank | Pos. | Sequence | Mods (variable)              | Glycans                 | Score  | delta Mo Score | z   | Obs. m/z | Calc. m/z | ppm err. | Off-By-X | Obs. MH   | Calc. MH  | Cleavage | Glycans Pos. | Protein Name                                                                       | Prot. Id | Scan Time |                 |
|-----|------------|------|----------|------------------------------|-------------------------|--------|----------------|-----|----------|-----------|----------|----------|-----------|-----------|----------|--------------|------------------------------------------------------------------------------------|----------|-----------|-----------------|
| 1   | 169...     | 1    | 102      | R.LKPAIS[+1134.36976]SALSK.D | S6(OGlycan / 1134.3698) | Hex(7) | 512.5          | 2.0 | 3        | 750.3455  | 750.3558 | -13.73   | 2249.0219 | 2249.0528 | Specific | 6            | >sp Q3E770 PAU9_YEAST Seripauperin-9 OS=Saccharomyces cerevisiae (strain ATCC 2... | 3461     | 9.6747    | sample=1 period |

  

**Proteins** Text filter...

| Prot. Rank | Protein Name | [Log Prob]                                                                                              | Best [Log Prob] | Best Score | # Spectra | # Uniq. Peps. | # Mod Peps. | % Cov. | # AAs | Intensity |          |
|------------|--------------|---------------------------------------------------------------------------------------------------------|-----------------|------------|-----------|---------------|-------------|--------|-------|-----------|----------|
| 3          | 3            | >sp P0CE85 PAU19_YEAST Seripauperin-19 OS=Saccharomyces cerevisiae (strain ATCC 204508 / S288c) OX=5... | 123.82          | 11.06      | 692.3     | 77            | 31          | 30     | 42.7  | 124       | 2.619e+6 |
| 1.14       | 1.14         | >sp K2C1_HUMAN Common contaminant protein                                                               | 75.57           | 13.70      | 021.5     | 17            | 8           | 0      | 13.8  | 643       | 1.827e+5 |

Spectrum (double click to dock / undock)

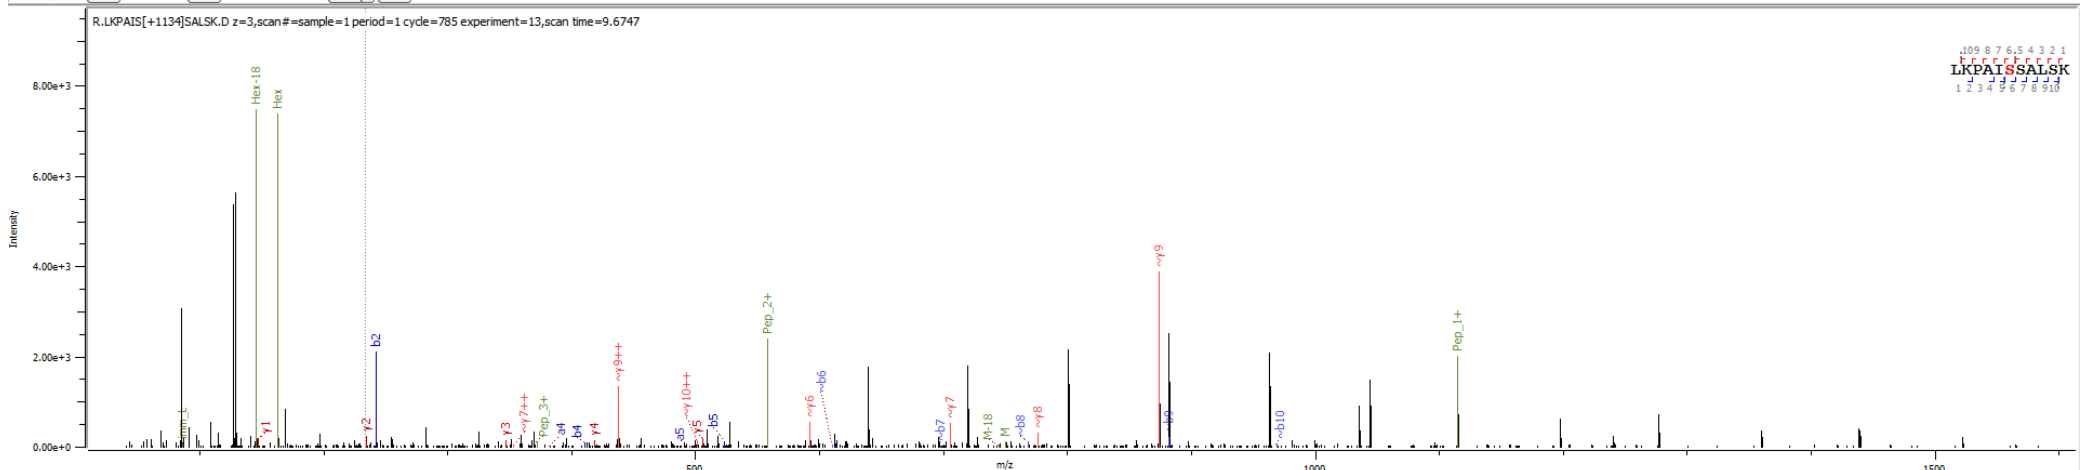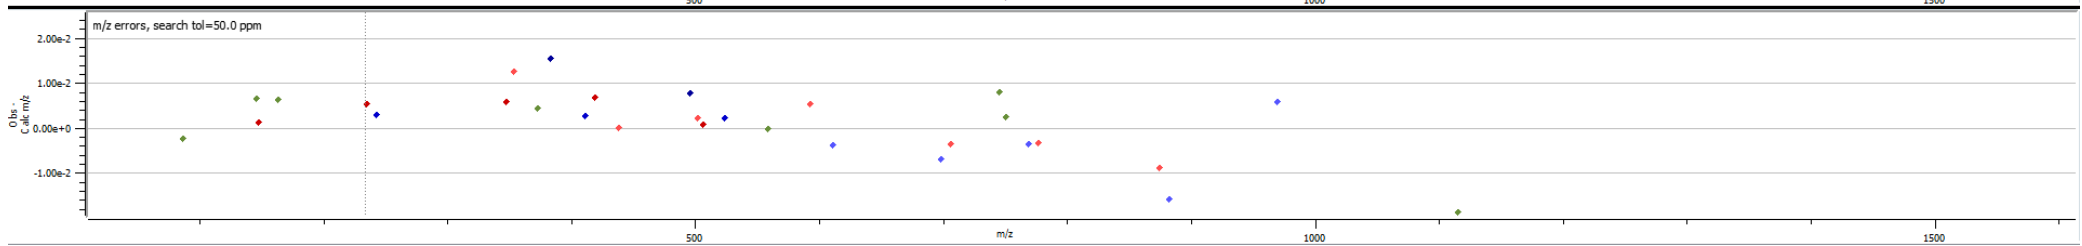

Sample S3 R.LKPAIS[+1134.370]SALSK.D

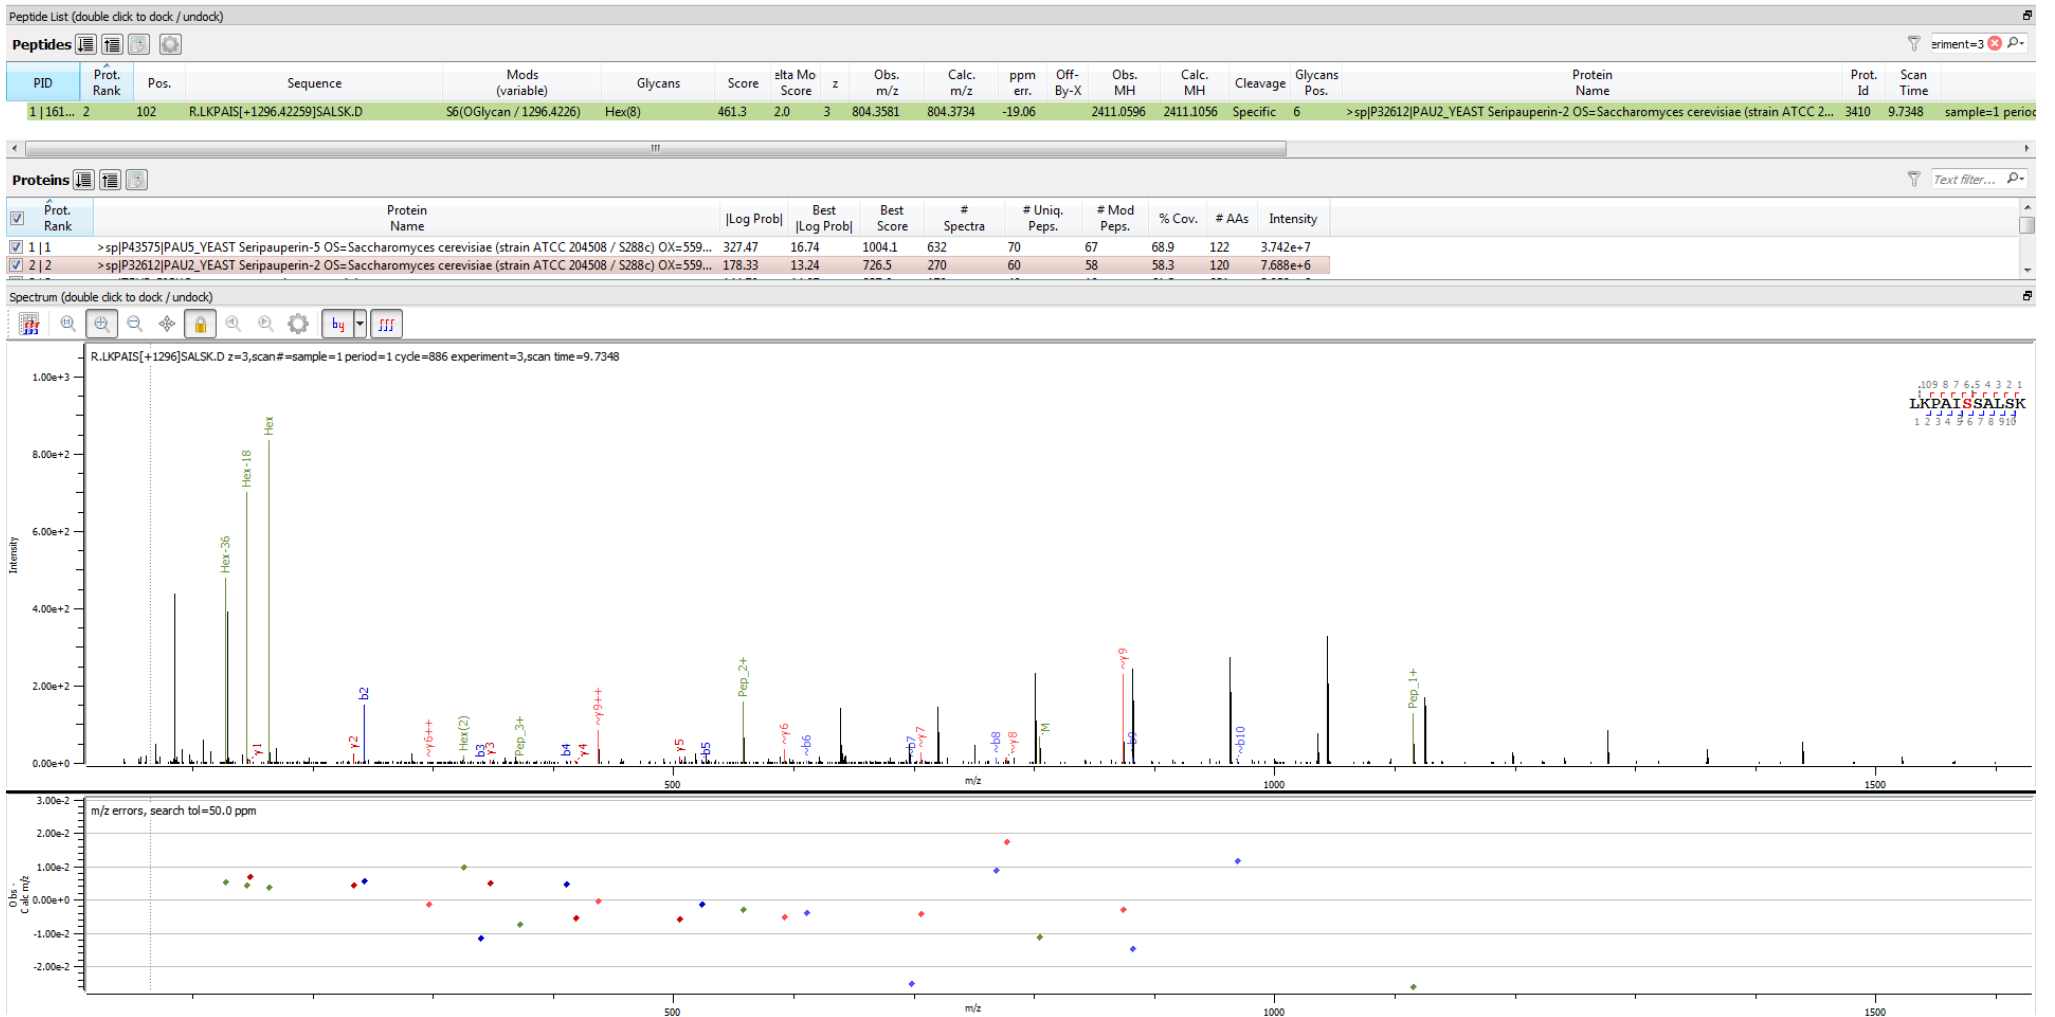

Sample S1 R.LKPAIS[+1296.423]SALSK.D



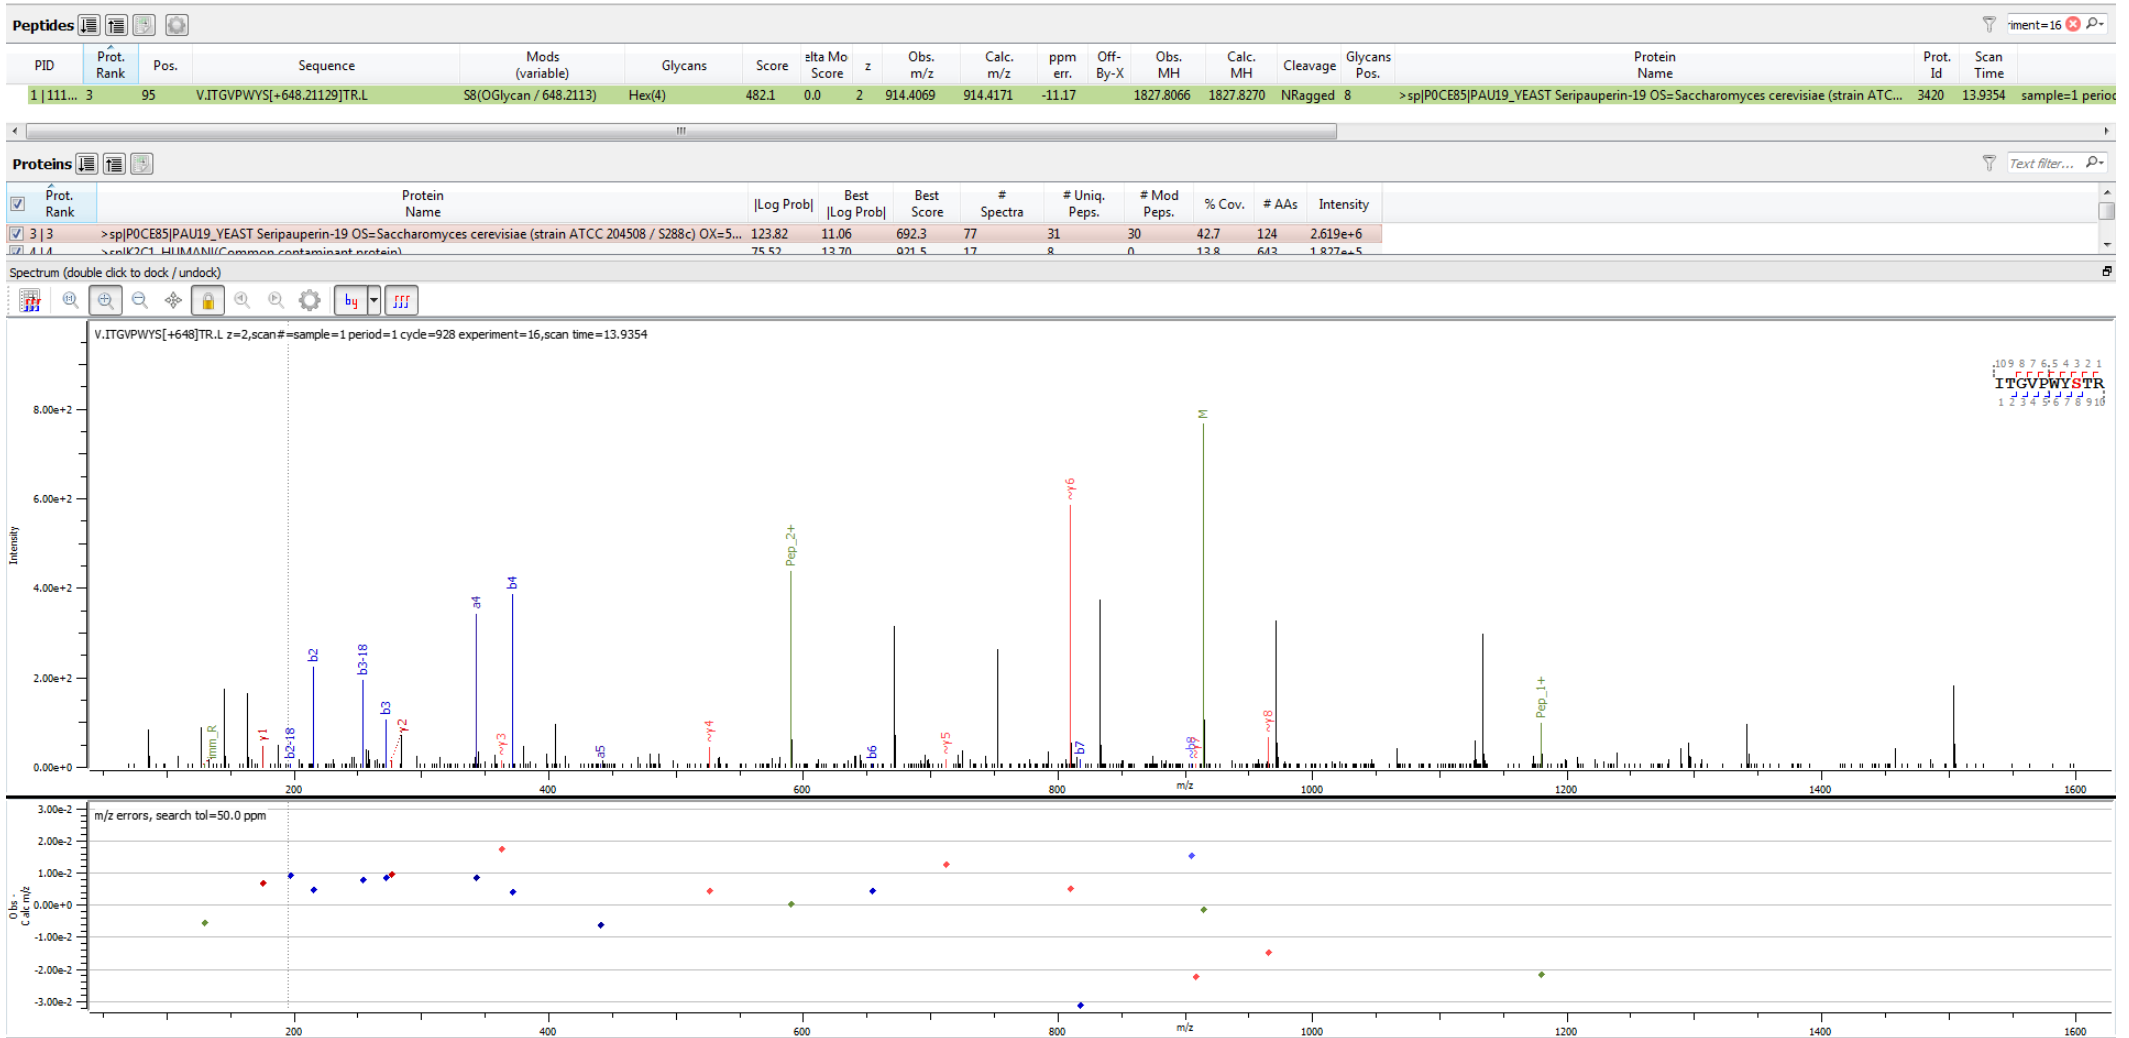

Sample S3 V.ITGVPWYS[+648.211]TR.L

| PID | Prot. Rank | Pos. | Sequence | Mods (variable)            | Glycans                | Score  | delta Mo Score | z   | Obs. m/z | Calc. m/z | ppm err. | Off-By-X | Obs. MH   | Calc. MH  | Cleavage | Glycans Pos. | Protein Name                                                                      | Prot. Id | Scan Time |                 |
|-----|------------|------|----------|----------------------------|------------------------|--------|----------------|-----|----------|-----------|----------|----------|-----------|-----------|----------|--------------|-----------------------------------------------------------------------------------|----------|-----------|-----------------|
| 1   | 100...     | 5    | 95       | V.ITGVPWYST[+810.26412]R.L | T9(OGlycan / 810.2641) | Hex(5) | 468.8          | 0.0 | 2        | 995.4310  | 995.4435 | -12.56   | 1989.8548 | 1989.8798 | NRagged  | 9            | >sp POCE85 PAU19_YEAST Seripauperin-19 OS=Saccharomyces cerevisiae (strain ATC... | 3420     | 13.9113   | sample=1 period |

| Prot. Rank | Protein Name                                                                                            | Log Prob | Best  Log Prob | Best Score | # Spectra | # Uniq. Peps. | # Mod. Peps. | % Cov. | # AAs | Intensity |
|------------|---------------------------------------------------------------------------------------------------------|----------|----------------|------------|-----------|---------------|--------------|--------|-------|-----------|
| 3   3      | >sp P43575 PAU5_YEAST Seripauperin-5 OS=Saccharomyces cerevisiae (strain ATCC 204508 / S288c) OX=559... | 117.08   | 14.43          | 972.1      | 214       | 40            | 39           | 34.4   | 122   | 3.360e+6  |

Spectrum (double click to dock / undock)

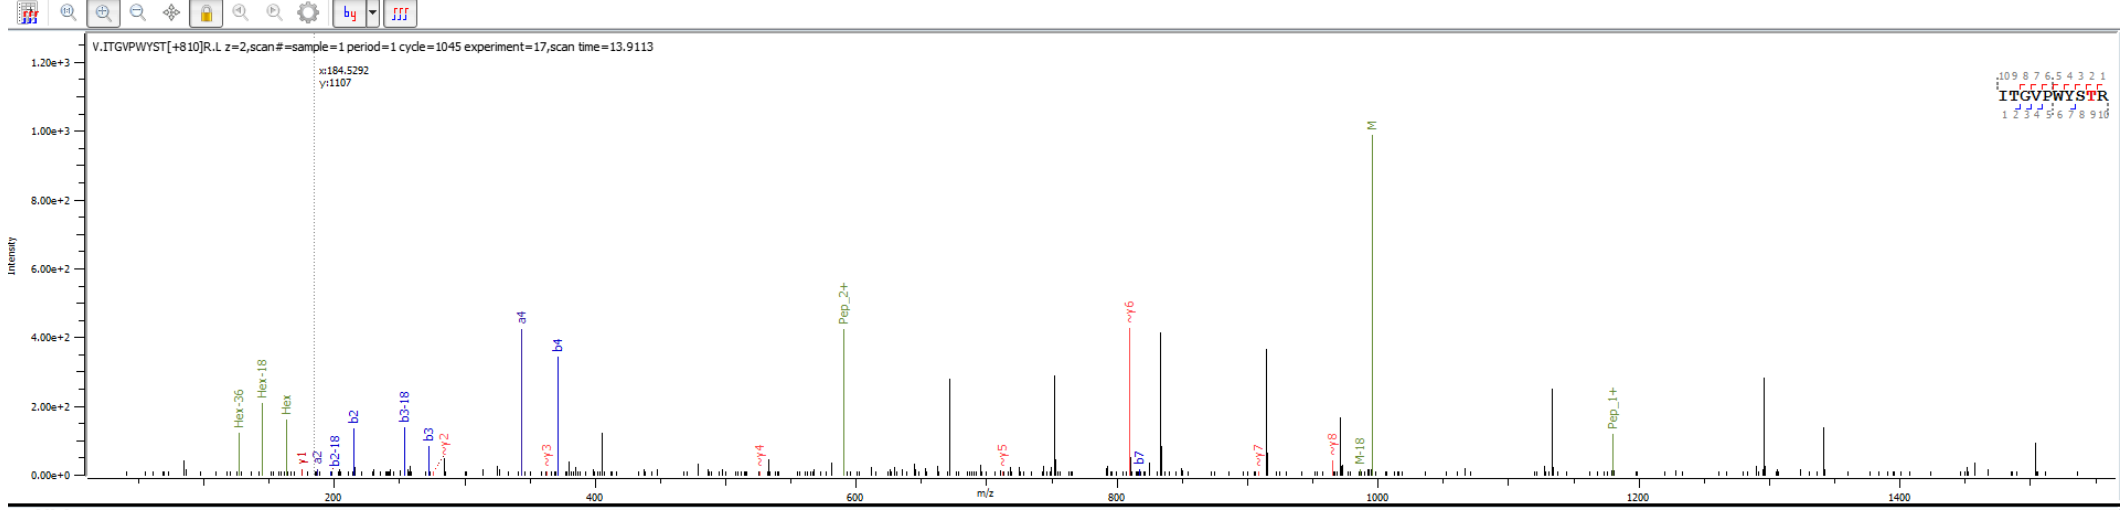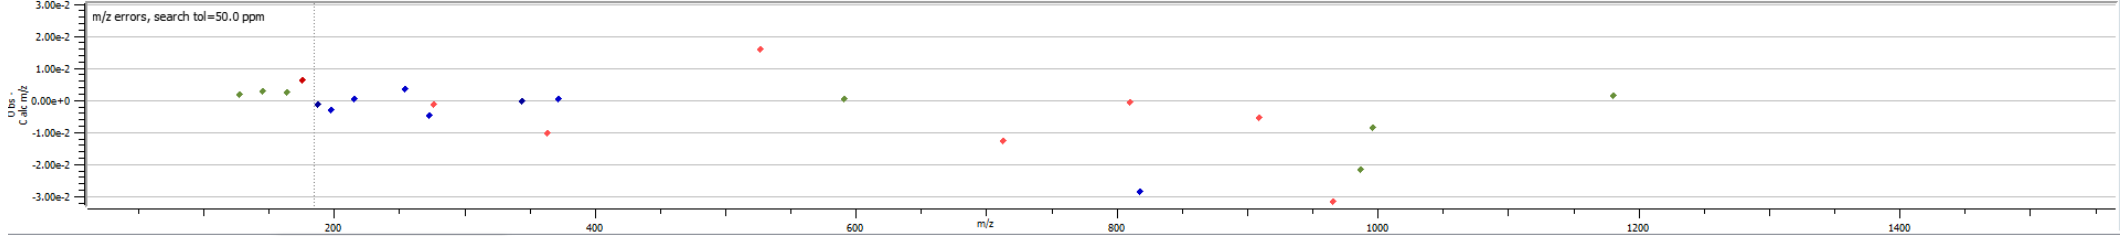

Sample S2 V.ITGVPWYST[+810.264]R.L

Peptide List (double click to dock / undock)

| PID        | Prot. Rank | Pos. | Sequence                    | Mods (variable)        | Glycans | Score | delta Mo Score | z | Obs. m/z | Calc. m/z | ppm err. | Off-By-X | Obs. MH   | Calc. MH  | Cleavage | Glycans Pos. | Protein Name                                                                      | Prot. Id | Scan Time               |
|------------|------------|------|-----------------------------|------------------------|---------|-------|----------------|---|----------|-----------|----------|----------|-----------|-----------|----------|--------------|-----------------------------------------------------------------------------------|----------|-------------------------|
| 1   101... | 5          | 95   | V.ITGVWPWYS[+810.26412]TR.L | S8(OGlycan / 810.2641) | Hex(5)  | 448.0 | 0.0            | 3 | 663.9558 | 663.9648  | -13.58   |          | 1989.8528 | 1989.8798 | NRagged  | 8            | >sp P0CE85 PAU19_YEAST Seripauperin-19 OS=Saccharomyces cerevisiae (strain ATC... | 3420     | 14.0252 sample=1 period |

Proteins

| Prot. Rank | Protein Name                                                                                            | [Log Prob] | Best [Log Prob] | Best Score | # Spectra | # Uniq. Peps. | # Mod Peps. | % Cov. | # AAs | Intensity |
|------------|---------------------------------------------------------------------------------------------------------|------------|-----------------|------------|-----------|---------------|-------------|--------|-------|-----------|
| 3   3      | >sp P43575 PAU5_YEAST Seripauperin-5 OS=Saccharomyces cerevisiae (strain ATCC 204508 / S288c) OX=559... | 117.08     | 14.43           | 972.1      | 214       | 40            | 39          | 34.4   | 122   | 3.360e+6  |

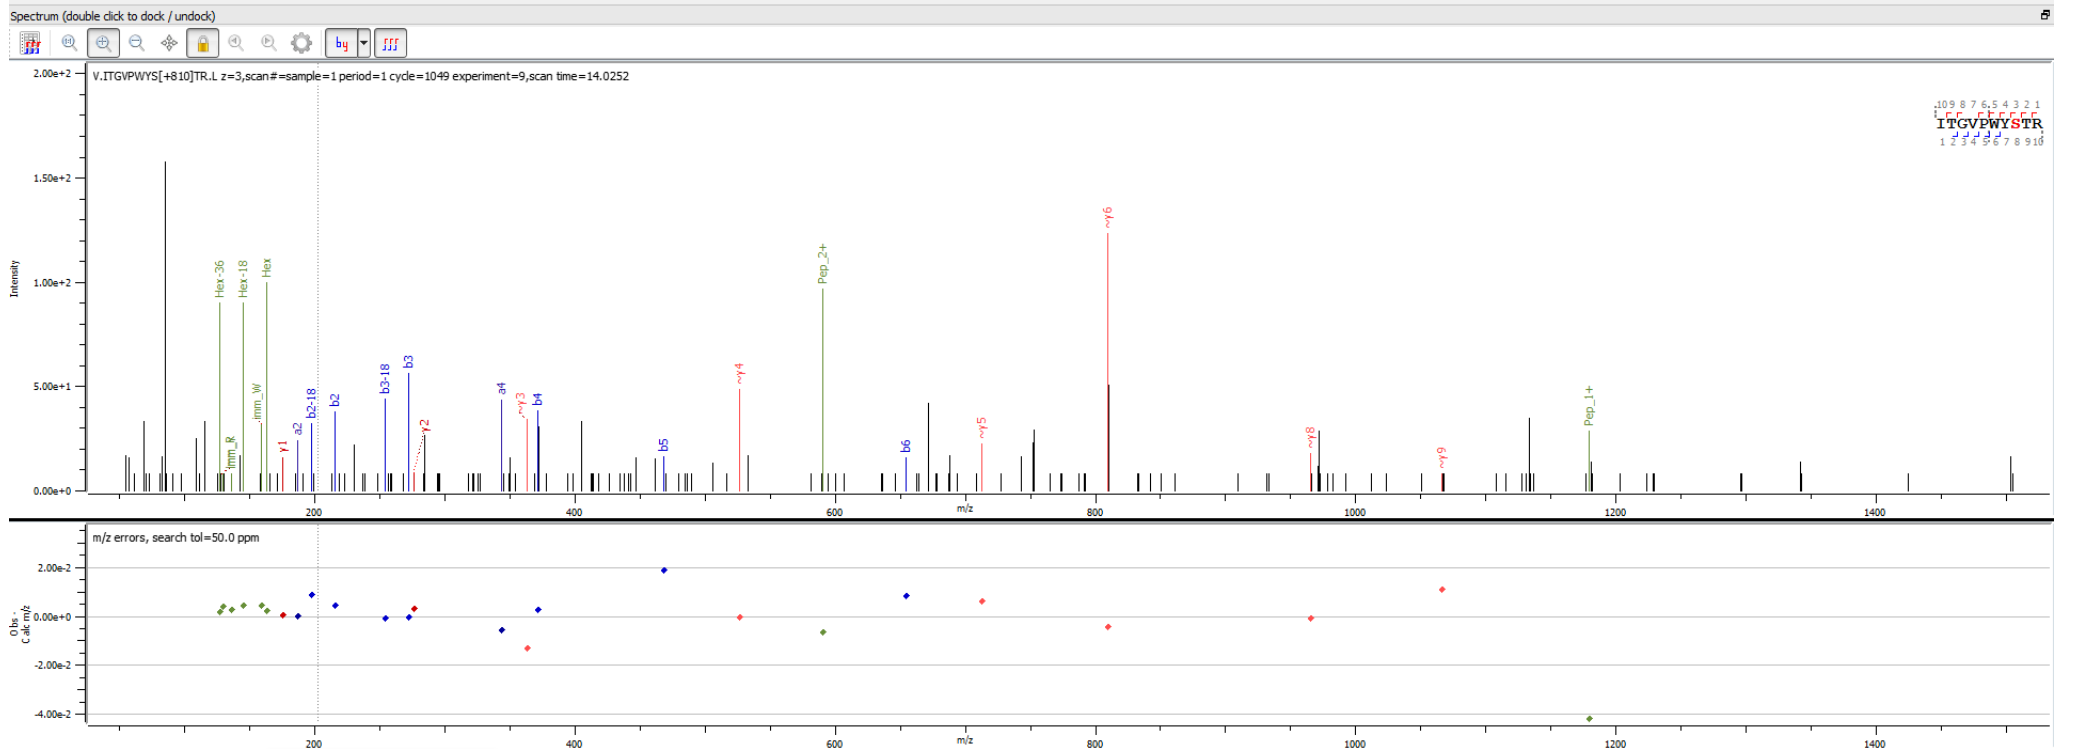

Sample S2 V.ITGVWPWYS[+810.264]TR.L

| PID | Prot. Rank | Pos. | Sequence                   | Mods (variable)        | Glycans | Score | delta Mo Score | z | Obs. m/z  | Calc. m/z | ppm err. | Off-By-X | Obs. MH   | Calc. MH  | Cleavage  | Glycans Pos. | Protein Name                                                                      | Prot. Id | Scan Time |
|-----|------------|------|----------------------------|------------------------|---------|-------|----------------|---|-----------|-----------|----------|----------|-----------|-----------|-----------|--------------|-----------------------------------------------------------------------------------|----------|-----------|
| 1   | 126...     | 5    | V.ITGVPWYS[+972.31694]TR.L | S8(Oglycan / 972.3169) | Hex(6)  | 445.2 | 1.2            | 2 | 1076.4524 | 1076.4699 | -16.26   |          | 2151.8976 | 2151.9326 | NRagged 8 |              | >sp P0CE85 PAU19_YEAST Seripauperin-19 OS=Saccharomyces cerevisiae (strain ATC... | 3420     | 13.7051   |

| Prot. Rank | Protein Name                                                                                            | [Log Prob] | Best [Log Prob] | Best Score | # Spectra | # Uniq. Peps. | # Mod Peps. | % Cov. | # AAs | Intensity |
|------------|---------------------------------------------------------------------------------------------------------|------------|-----------------|------------|-----------|---------------|-------------|--------|-------|-----------|
| 3   3      | >sp P43575 PAU5_YEAST Seripauperin-5 OS=Saccharomyces cerevisiae (strain ATCC 204508 / S288c) OX=559... | 117.08     | 14.43           | 972.1      | 214       | 40            | 39          | 34.4   | 122   | 3.360e+6  |

Spectrum (double click to dock / undock)

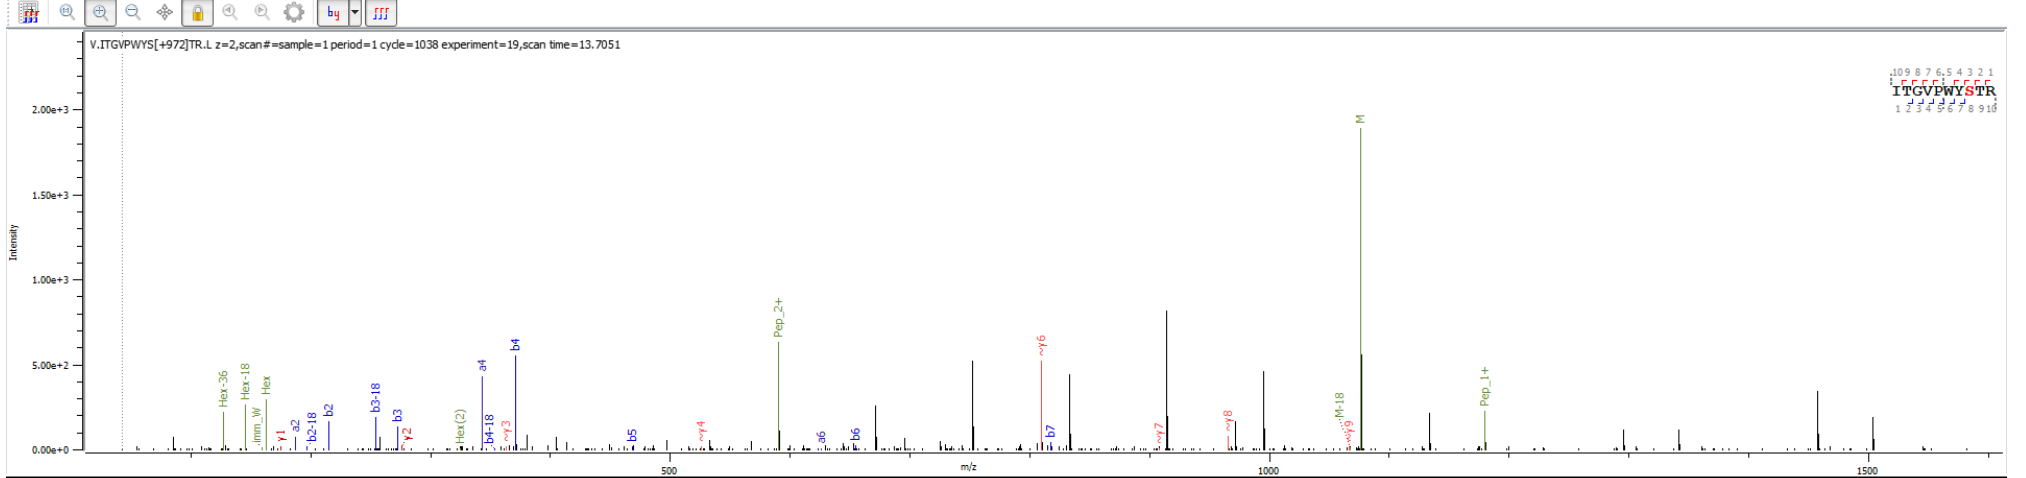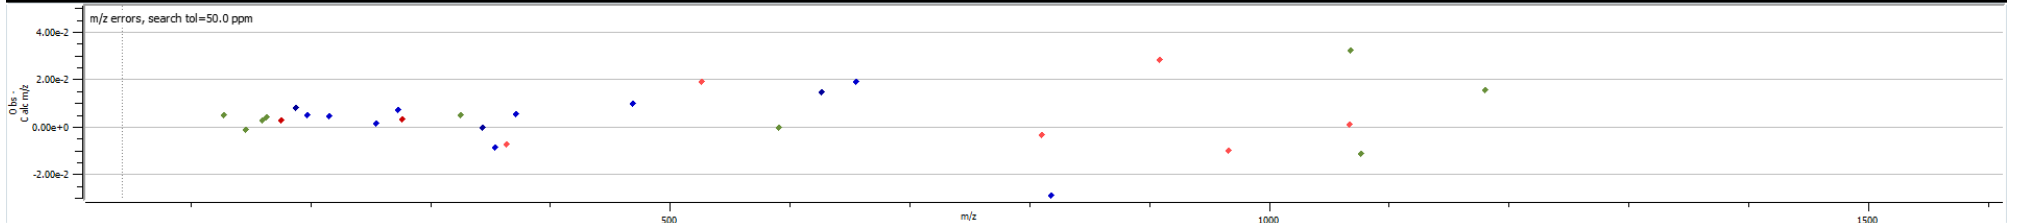

Sample S2 V.ITGVPWYS[+972.317]TR.L

| PID        | Prot. Rank | Pos. | Sequence                   | Mods (variable)        | Glycans | Score | ΔMo Score | z | Obs. m/z | Calc. m/z | ppm err. | Off-By-X | Obs. MH   | Calc. MH  | Cleavage  | Glycans Pos. | Protein Name                                                                      | Prot. Id | Scan Time |                 |
|------------|------------|------|----------------------------|------------------------|---------|-------|-----------|---|----------|-----------|----------|----------|-----------|-----------|-----------|--------------|-----------------------------------------------------------------------------------|----------|-----------|-----------------|
| 1   126... | 5          | 95   | V.ITGVPWYS[+972.31694]TR.L | S8(Oglycan / 972.3169) | Hex(6)  | 538.7 | 1.2       | 3 | 717.9694 | 717.9824  | -18.08   |          | 2151.8937 | 2151.9326 | NRagged 8 |              | >sp P0CE85 PAU19_YEAST Seripauperin-19 OS=Saccharomyces cerevisiae (strain ATC... | 3420     | 13.7270   | sample=1 period |

| Prot. Rank | Protein Name                                                                                            | [Log Prob] | Best [Log Prob] | Best Score | # Spectra | # Uniq. Peps. | # Mod Peps. | % Cov. | # AAs | Intensity |
|------------|---------------------------------------------------------------------------------------------------------|------------|-----------------|------------|-----------|---------------|-------------|--------|-------|-----------|
| 3   3      | >sp P43575 PAU5_YEAST Seripauperin-5 OS=Saccharomyces cerevisiae (strain ATCC 204508 / S288c) OX=559... | 117.08     | 14.43           | 972.1      | 214       | 40            | 39          | 34.4   | 122   | 3.360e+6  |

Spectrum (double click to dock / undock)

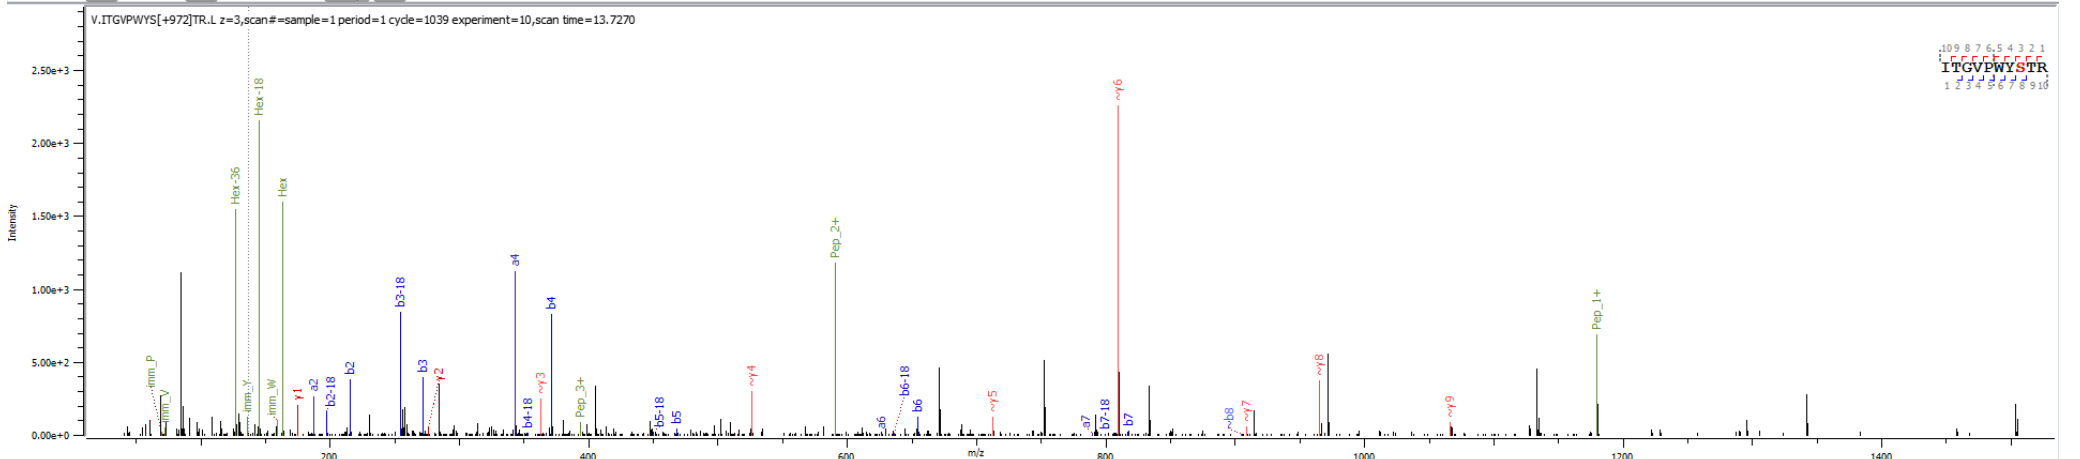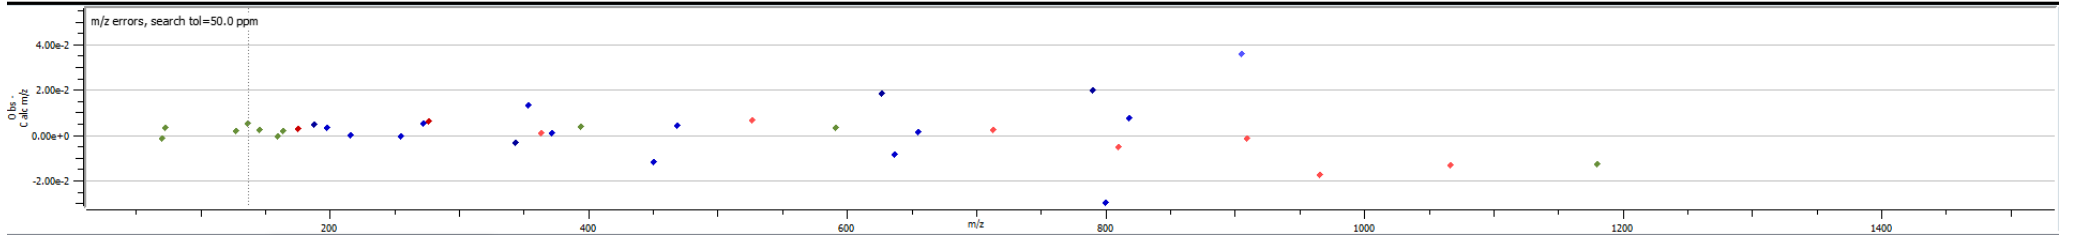

Sample S2 V.ITGVPWYS[+972.317]TR.L

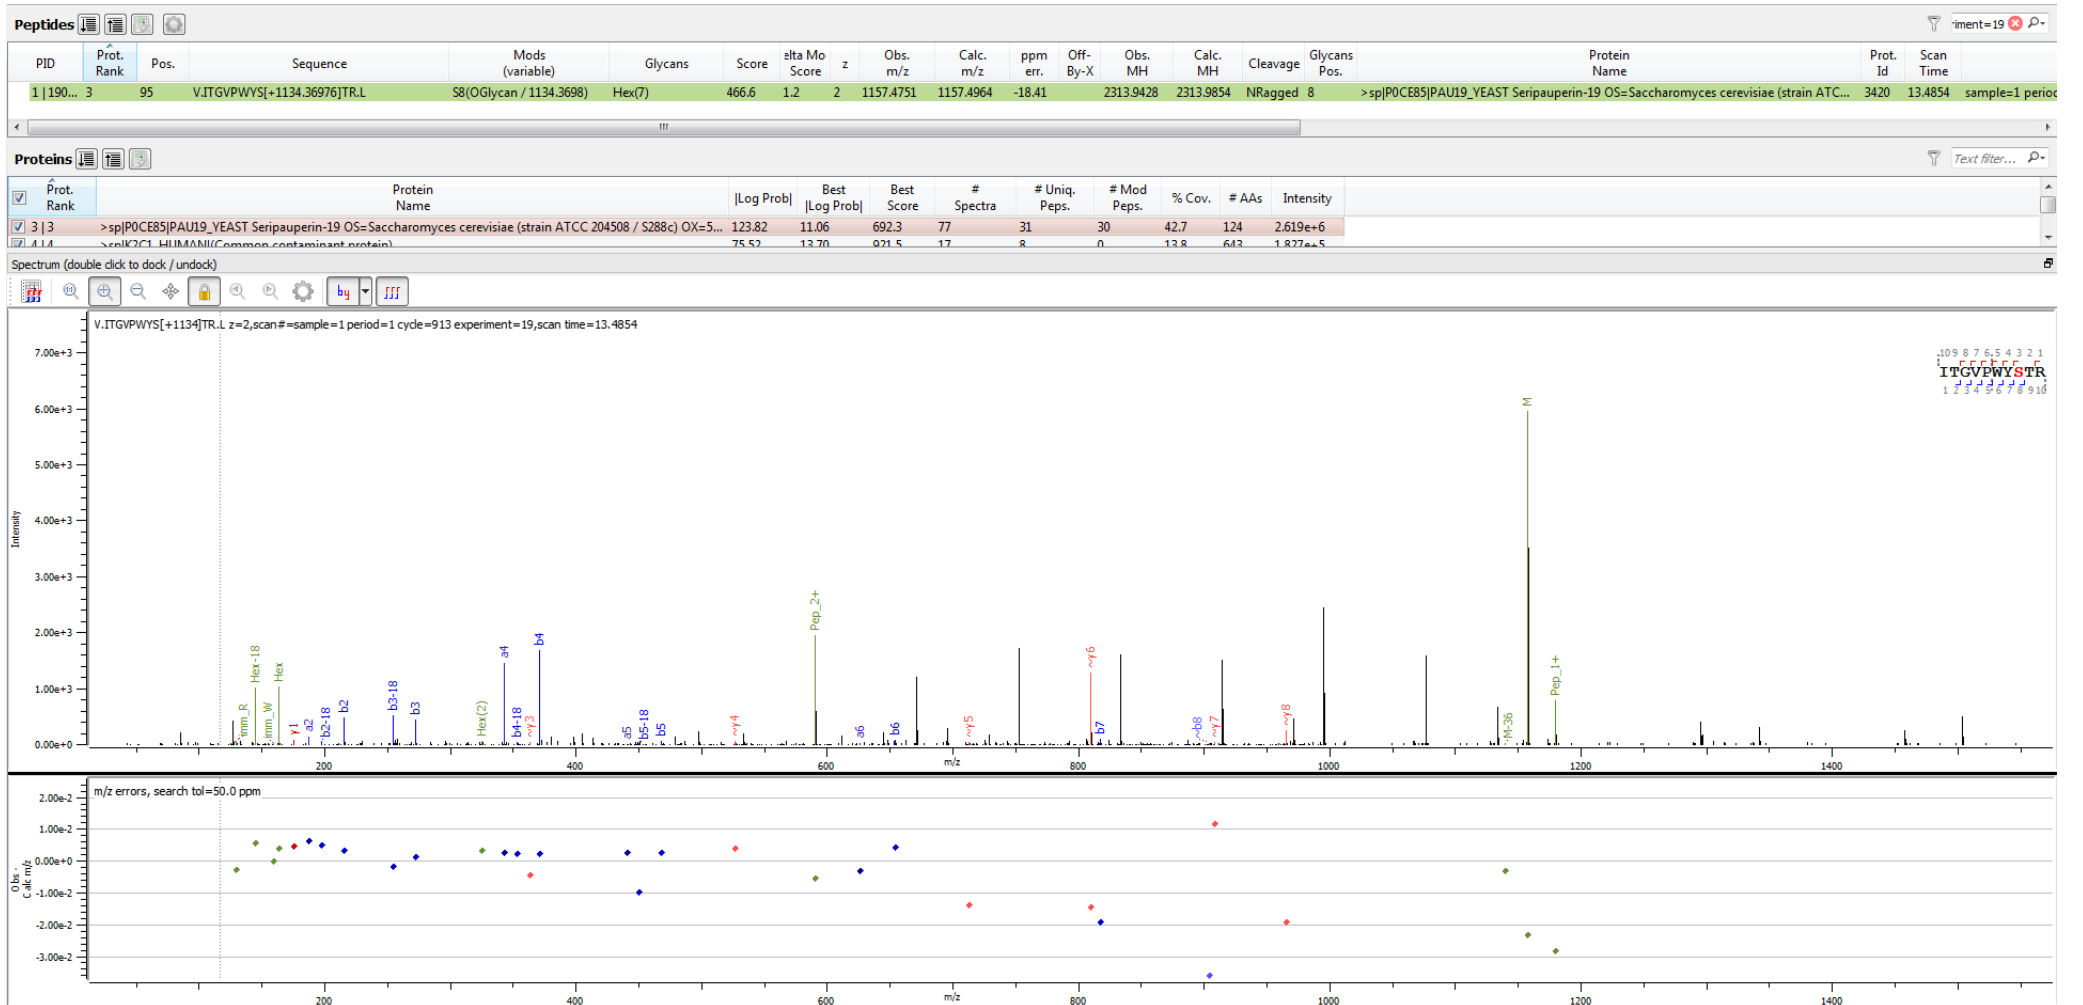

Sample S3 V.ITGVPWYS[+1134.370]TR.L

| PID | Prot. Rank | Pos. | Sequence                   | Mods (variable)         | Glycans | Score | delta Mo Score | z | Obs. m/z | Calc. m/z | ppm err. | Off-By-X | Obs. MH   | Calc. MH  | Cleavage  | Glycans Pos. | Protein Name                                                                      | Prot. Id | Scan Time |
|-----|------------|------|----------------------------|-------------------------|---------|-------|----------------|---|----------|-----------|----------|----------|-----------|-----------|-----------|--------------|-----------------------------------------------------------------------------------|----------|-----------|
| 1   | 150...     | 5    | V.ITGVPWYS[+1134.36976]TRL | S8(OGlycan / 1134.3698) | Hex(7)  | 492.5 | 1.2            | 3 | 771.9868 | 772.0000  | -17.08   |          | 2313.9459 | 2313.9854 | NRagged 8 |              | >sp P0CE85 PAU19_YEAST Seripauperin-19 OS=Saccharomyces cerevisiae (strain ATC... | 3420     | 13.5215   |

| Prot. Rank | Protein Name                                                                                            | [Log Prob] | Best [Log Prob] | Best Score | # Spectra | # Uniq. Peps. | # Mod Peps. | % Cov. | # AAs | Intensity |
|------------|---------------------------------------------------------------------------------------------------------|------------|-----------------|------------|-----------|---------------|-------------|--------|-------|-----------|
| 3   3      | >sp P43575 PAU5_YEAST Seripauperin-5 OS=Saccharomyces cerevisiae (strain ATCC 204508 / S288c) OX=559... | 117.08     | 14.43           | 972.1      | 214       | 40            | 39          | 34.4   | 122   | 3.360e+6  |

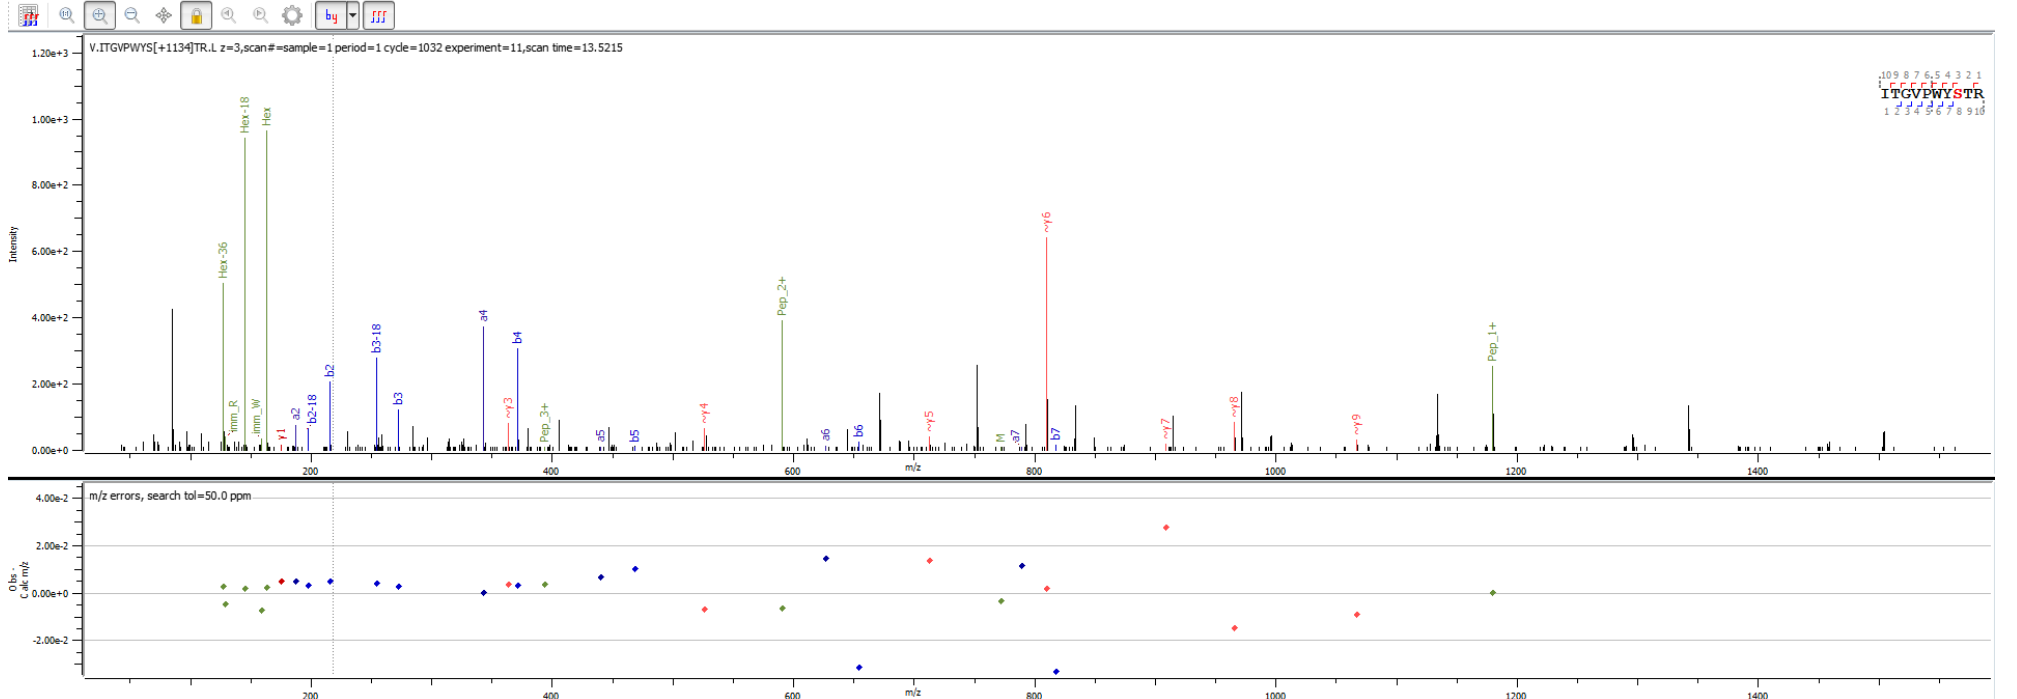

Sample S2 V.ITGVPWYS[+1134.370]TRL

| PID | Prot. Rank | Pos. | Sequence | Mods (variable)          | Glycans                | Score  | alta Mo Score | z   | Obs. m/z | Calc. m/z | ppm err. | Off-By-X | Obs. MH   | Calc. MH  | Cleavage | Glycans Pos. | Protein Name                                                                       | Prot. Id | Scan Time |                 |
|-----|------------|------|----------|--------------------------|------------------------|--------|---------------|-----|----------|-----------|----------|----------|-----------|-----------|----------|--------------|------------------------------------------------------------------------------------|----------|-----------|-----------------|
| 1   | 100...     | 3    | 94       | V.ITGVPWYS[+810.264]SR.L | S8(OGlycan / 810.2641) | Hex(5) | 545.2         | 0.0 | 2        | 988.4244  | 988.4357 | -11.45   | 1975.8415 | 1975.8641 | NRagged  | 8            | >sp P43575 PAU5_YEAST Seripauperin-5 OS=Saccharomyces cerevisiae (strain ATCC 2... | 3411     | 13.8496   | sample=1 period |

| Prot. Rank | Protein Name                                                                                            | [Log Prob] | Best [Log Prob] | Best Score | # Spectra | # Uniq. Peps. | # Mod Peps. | % Cov. | # AAs | Intensity |
|------------|---------------------------------------------------------------------------------------------------------|------------|-----------------|------------|-----------|---------------|-------------|--------|-------|-----------|
| 3          | >sp P43575 PAU5_YEAST Seripauperin-5 OS=Saccharomyces cerevisiae (strain ATCC 204508 / S288c) OX=559... | 117.08     | 14.43           | 972.1      | 214       | 40            | 39          | 34.4   | 122   | 3.360e+6  |

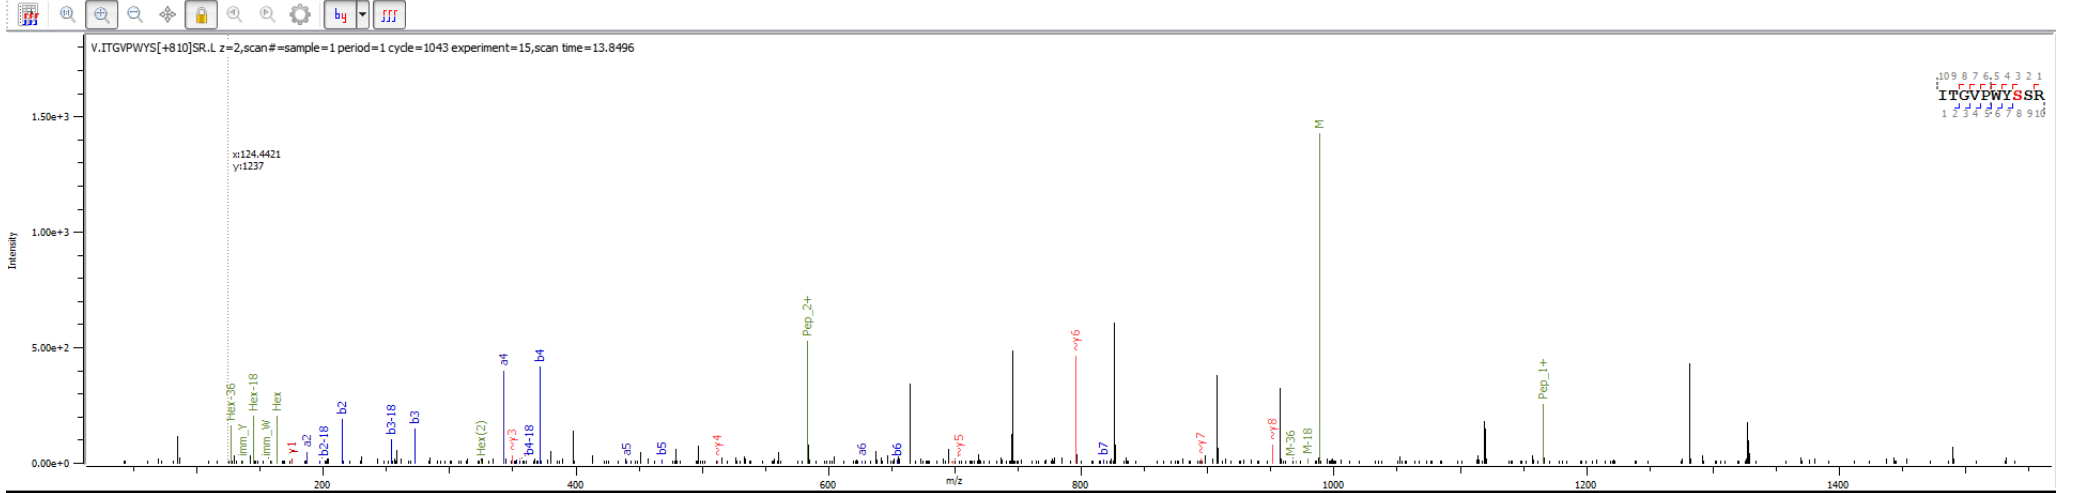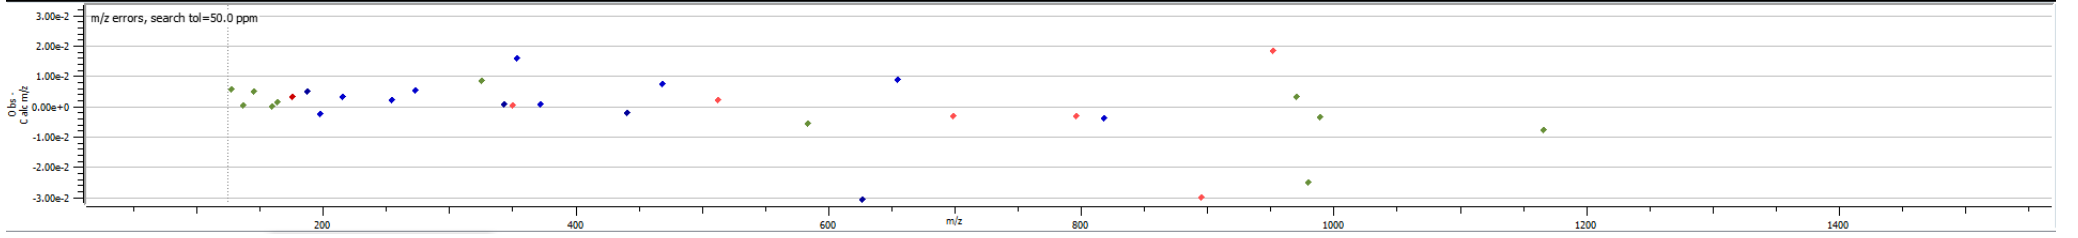

Sample S2 V.ITGVPWYS[+810.264]SR.L



| PID | Prot. Rank | Pos. | Sequence | Mods (variable)            | Glycans                | Score  | delta Mo Score | z   | Obs. m/z | Calc. m/z | ppm err. | Off-By-X | Obs. MH   | Calc. MH  | Cleavage | Glycans Pos. | Protein Name                                                                       | Prot. Id | Scan Time |
|-----|------------|------|----------|----------------------------|------------------------|--------|----------------|-----|----------|-----------|----------|----------|-----------|-----------|----------|--------------|------------------------------------------------------------------------------------|----------|-----------|
| 1   | 834...     | 1    | 94       | V.ITGVPWYSS[+810.26412]R.L | S9(OGlycan / 810.2641) | Hex(5) | 580.7          | 0.0 | 3        | 659.2827  | 659.2929 | -15.52   | 1975.8335 | 1975.8641 | NRagged  | 9            | >sp P43575 PAU5_YEAST Seripauperin-5 OS=Saccharomyces cerevisiae (strain ATCC 2... | 3411     | 13.8578   |

| Prot. Rank | Protein Name                                                                                            | [Log Prob] | Best [Log Prob] | Best Score | # Spectra | # Uniq. Peps. | # Mod Peps. | % Cov. | # AAs | Intensity |
|------------|---------------------------------------------------------------------------------------------------------|------------|-----------------|------------|-----------|---------------|-------------|--------|-------|-----------|
| 1          | >sp P43575 PAU5_YEAST Seripauperin-5 OS=Saccharomyces cerevisiae (strain ATCC 204508 / S288c) OX=559... | 136.57     | 14.25           | 968.4      | 163       | 30            | 27          | 28.7   | 122   | 1.440e+6  |

Spectrum (double click to dock / undock)

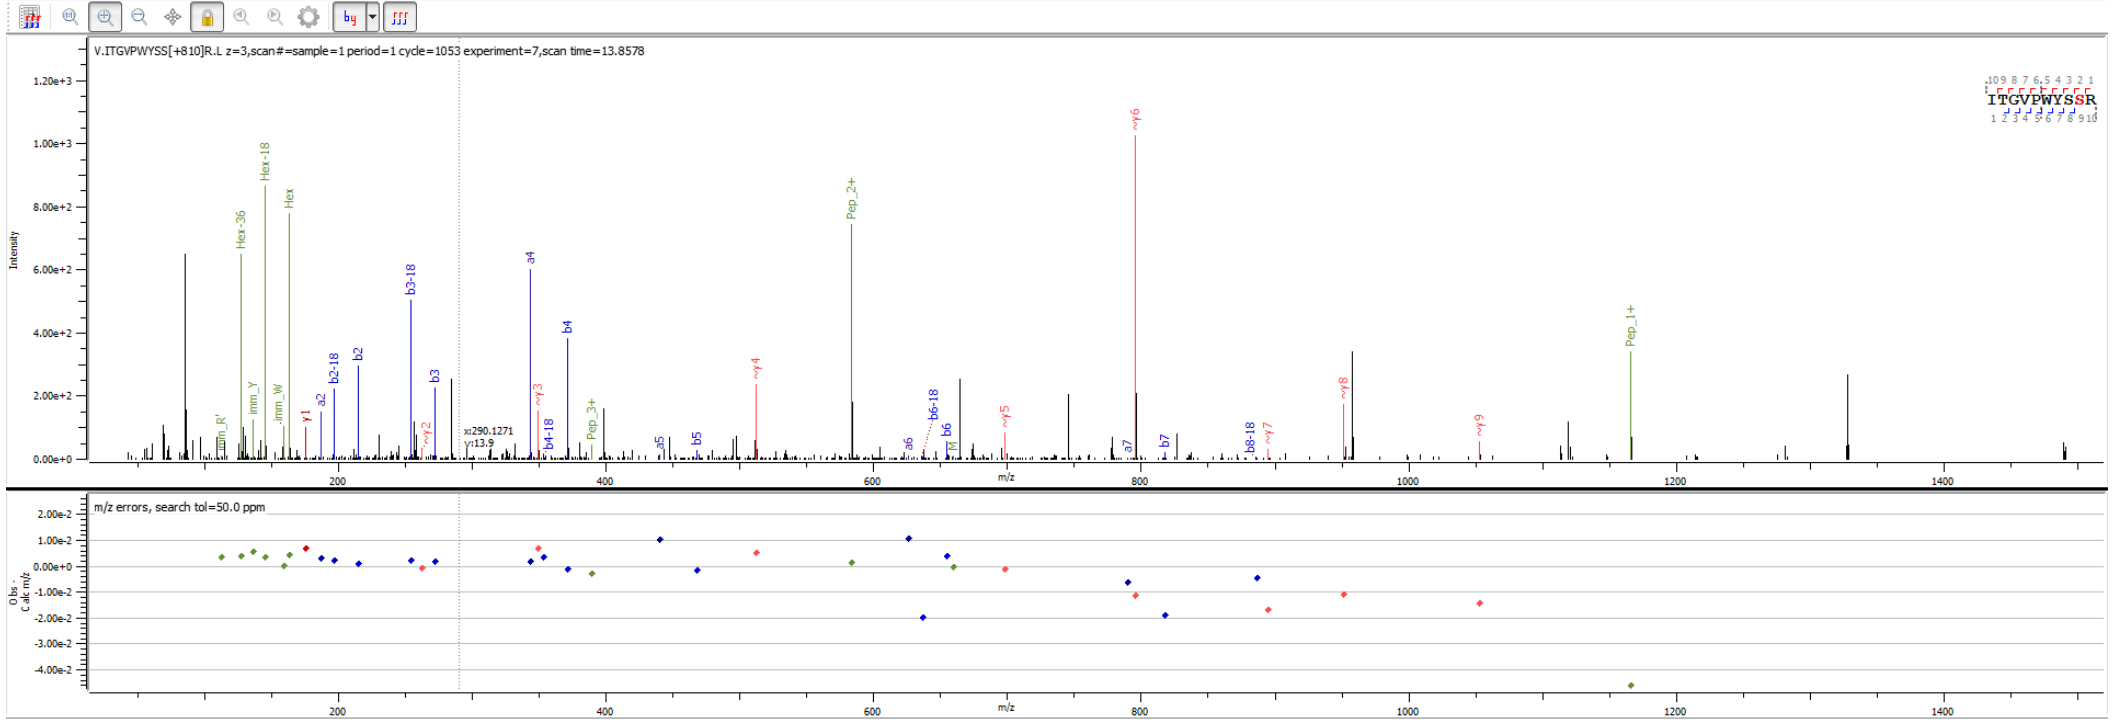

| PID        | Prot. Rank | Pos. | Sequence                   | Mods (variable)        | Glycans | Score | delta Mo Score | z | Obs. m/z  | Calc. m/z | ppm err. | Off-By-X | Obs. MH   | Calc. MH  | Cleavage  | Glycans Pos. | Protein Name                                                                       | Prot. Id | Scan Time |
|------------|------------|------|----------------------------|------------------------|---------|-------|----------------|---|-----------|-----------|----------|----------|-----------|-----------|-----------|--------------|------------------------------------------------------------------------------------|----------|-----------|
| 1   126... | 3          | 94   | V.ITGVPWYS[+972.31694]SR.L | S8(OGlycan / 972.3169) | Hex(6)  | 481.7 | 1.2            | 2 | 1069.4505 | 1069.4621 | -10.91   |          | 2137.8936 | 2137.9170 | NRagged 8 |              | >sp P43575 PAU5_YEAST Seripauperin-5 OS=Saccharomyces cerevisiae (strain ATCC 2... | 3411     | 13.5588   |

| Prot. Rank | Protein Name                                                                                            | [Log Prob] | Best [Log Prob] | Best Score | # Spectra | # Uniq. Peps. | # Mod Peps. | % Cov. | # AAs | Intensity |
|------------|---------------------------------------------------------------------------------------------------------|------------|-----------------|------------|-----------|---------------|-------------|--------|-------|-----------|
| 3   3      | >sp P43575 PAU5_YEAST Seripauperin-5 OS=Saccharomyces cerevisiae (strain ATCC 204508 / S288c) OX=559... | 117.08     | 14.43           | 972.1      | 214       | 40            | 39          | 34.4   | 122   | 3.360e+6  |

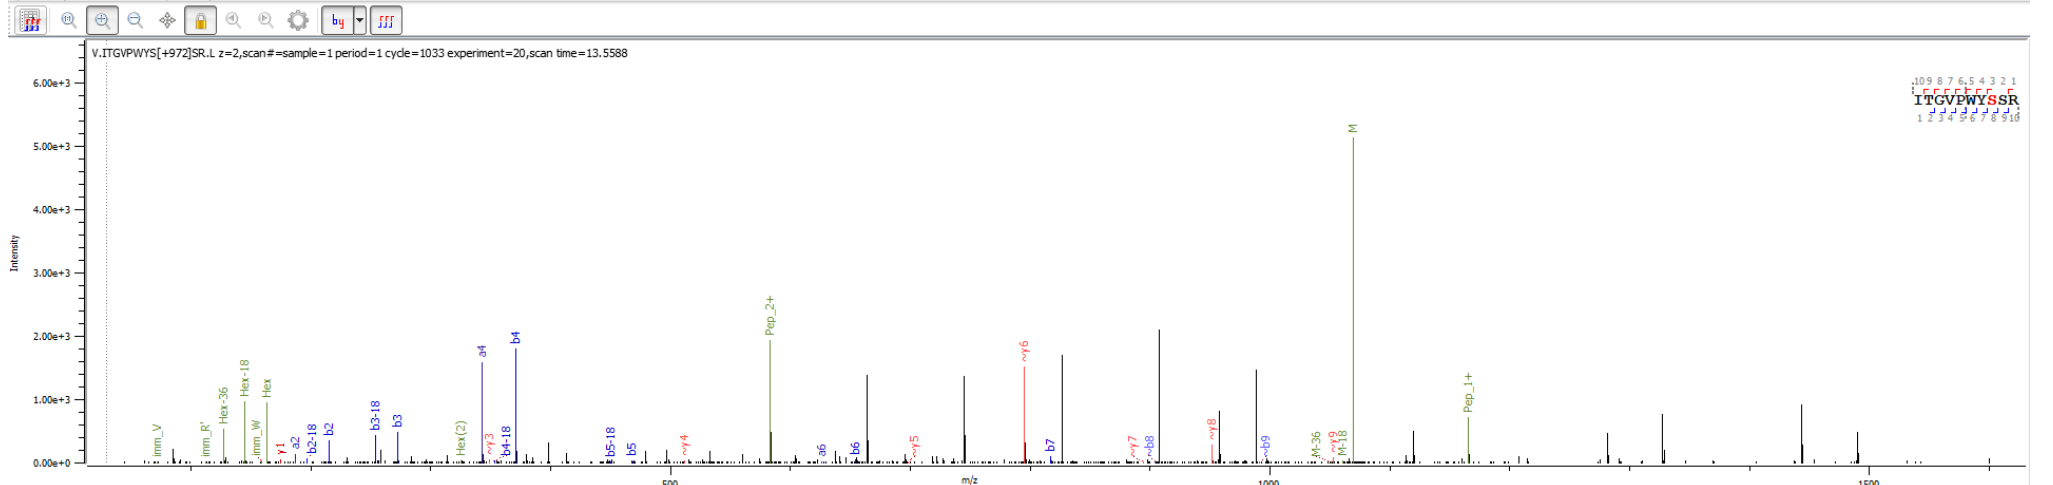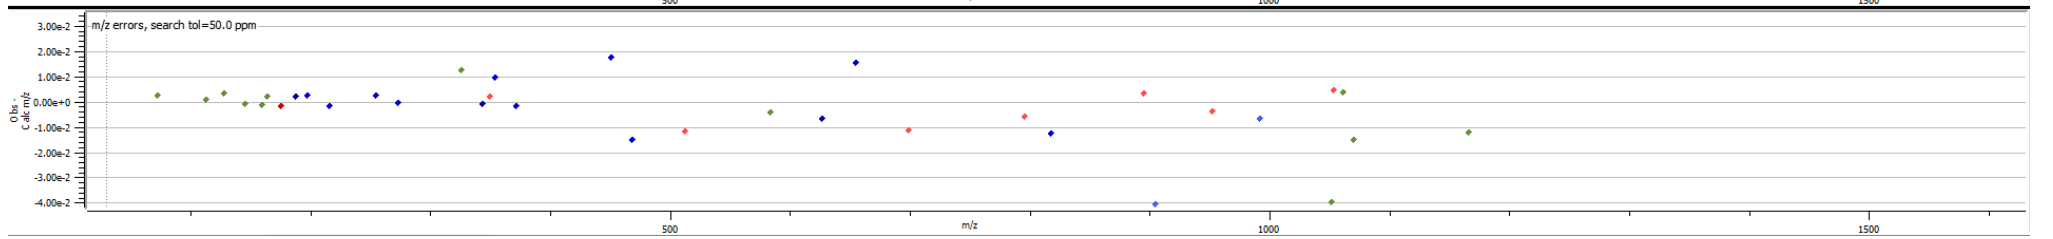

Sample S2 V.ITGVPWYS[+972.317]SR.L

| PID        | Prot. Rank | Pos. | Sequence                   | Mods (variable)        | Glycans | Score | delta Mo Score | z | Obs. m/z | Calc. m/z | ppm err. | Off-By-X | Obs. MH   | Calc. MH  | Cleavage  | Glycans Pos. | Protein Name                                                                       | Prot. Id | Scan Time |
|------------|------------|------|----------------------------|------------------------|---------|-------|----------------|---|----------|-----------|----------|----------|-----------|-----------|-----------|--------------|------------------------------------------------------------------------------------|----------|-----------|
| 1   125... | 3          | 94   | V.ITGVPWYS[+972.31694]SR.L | S8(OGlycan / 972.3169) | Hex(6)  | 532.3 | 1.2            | 3 | 713.3003 | 713.3105  | -14.33   |          | 2137.8863 | 2137.9170 | NRagged 8 |              | >sp P43575 PAU5_YEAST Seripauperin-5 OS=Saccharomyces cerevisiae (strain ATCC 2... | 3411     | 13.5199   |

| Prot. Rank | Protein Name                                                                                            | [Log Prob] | Best [Log Prob] | Best Score | # Spectra | # Uniq. Peps. | # Mod Peps. | % Cov. | # AAs | Intensity |
|------------|---------------------------------------------------------------------------------------------------------|------------|-----------------|------------|-----------|---------------|-------------|--------|-------|-----------|
| 3   3      | >sp P43575 PAU5_YEAST Seripauperin-5 OS=Saccharomyces cerevisiae (strain ATCC 204508 / S288c) OX=559... | 117.08     | 14.43           | 972.1      | 214       | 40            | 39          | 34.4   | 122   | 3.360e+6  |

Spectrum (double click to dock / undock)

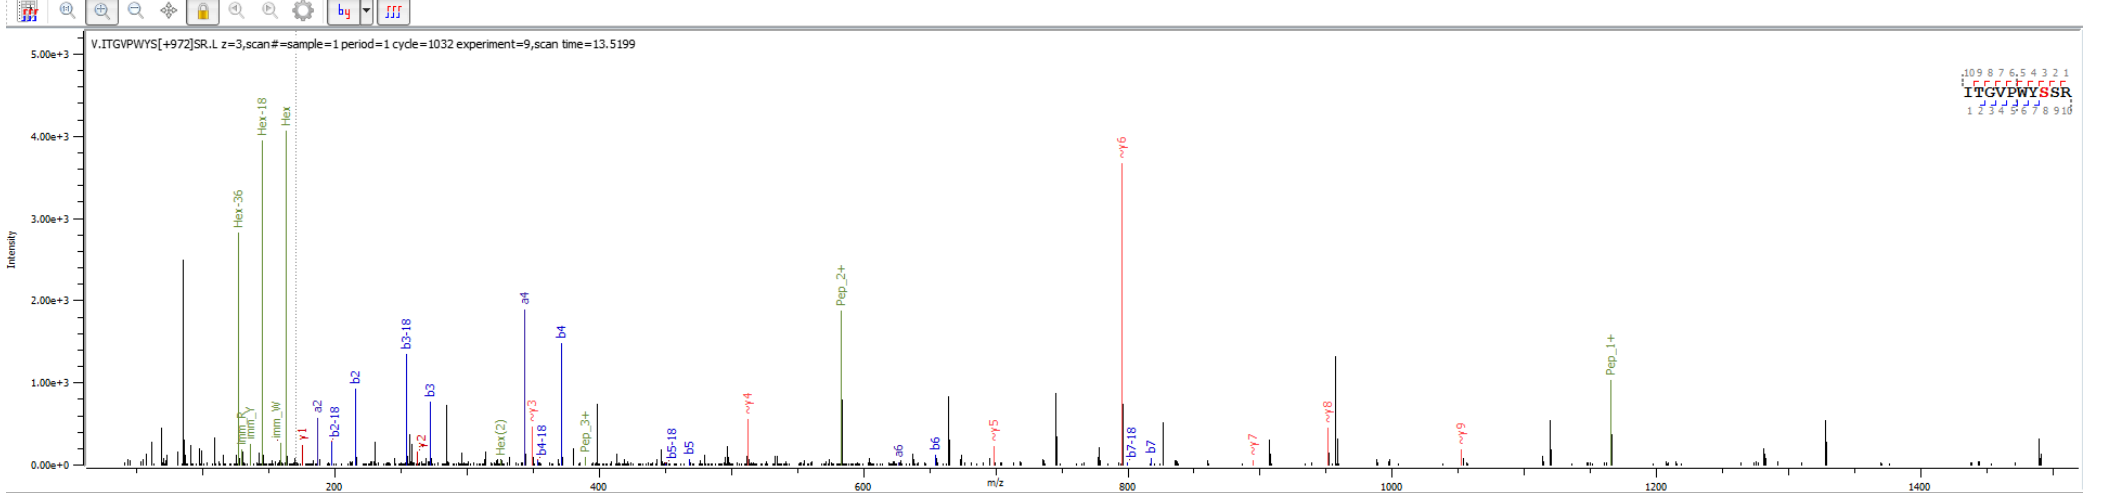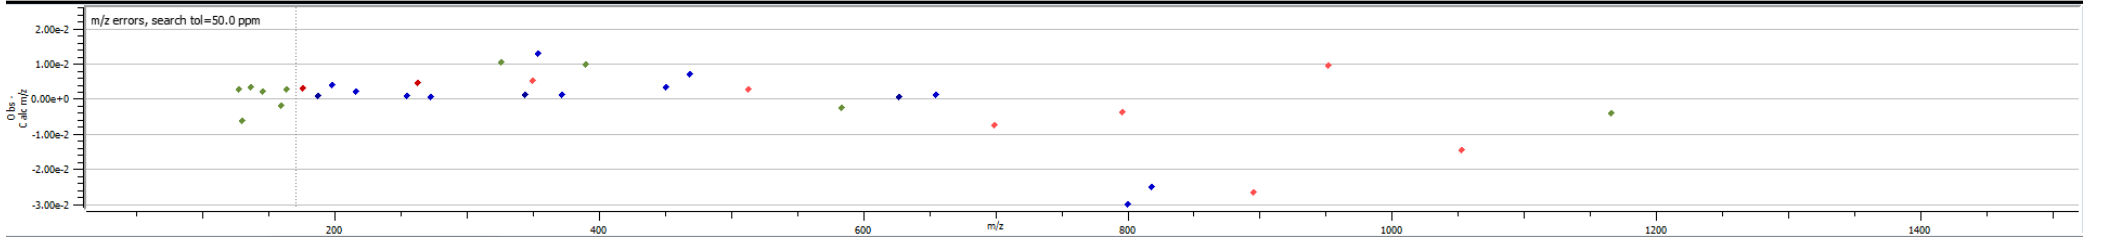

Sample S2 V.ITGVPWYS[+972.317]SR.L

| PID | Prot. Rank | Pos. | Sequence | Mods (variable)             | Glycans                 | Score  | ± Mo Score | z   | Obs. m/z | Calc. m/z | ppm err.  | Off-By-X | Obs. MH   | Calc. MH  | Cleavage | Glycans Pos. | Protein Name                                                                       | Prot. Id | Scan Time |
|-----|------------|------|----------|-----------------------------|-------------------------|--------|------------|-----|----------|-----------|-----------|----------|-----------|-----------|----------|--------------|------------------------------------------------------------------------------------|----------|-----------|
| 1   | 150...     | 3    | 94       | V.ITGVPWYS[+1134.36976]SR.L | S8(Oglycan / 1134.3698) | Hex(7) | 426.5      | 1.2 | 2        | 1150.4675 | 1150.4885 | -18.26   | 2299.9278 | 2299.9698 | NRagged  | 8            | >sp P43575 PAU5_YEAST Seripauperin-5 OS=Saccharomyces cerevisiae (strain ATCC 2... | 3411     | 13.3551   |

| Prot. Rank | Protein Name                                                                                            | [Log Prob] | Best [Log Prob] | Best Score | # Spectra | # Uniq. Peps. | # Mod Peps. | % Cov. | # AAs | Intensity |
|------------|---------------------------------------------------------------------------------------------------------|------------|-----------------|------------|-----------|---------------|-------------|--------|-------|-----------|
| 3   3      | >sp P43575 PAU5_YEAST Seripauperin-5 OS=Saccharomyces cerevisiae (strain ATCC 204508 / S288c) OX=559... | 117.08     | 14.43           | 972.1      | 214       | 40            | 39          | 34.4   | 122   | 3.360e+6  |

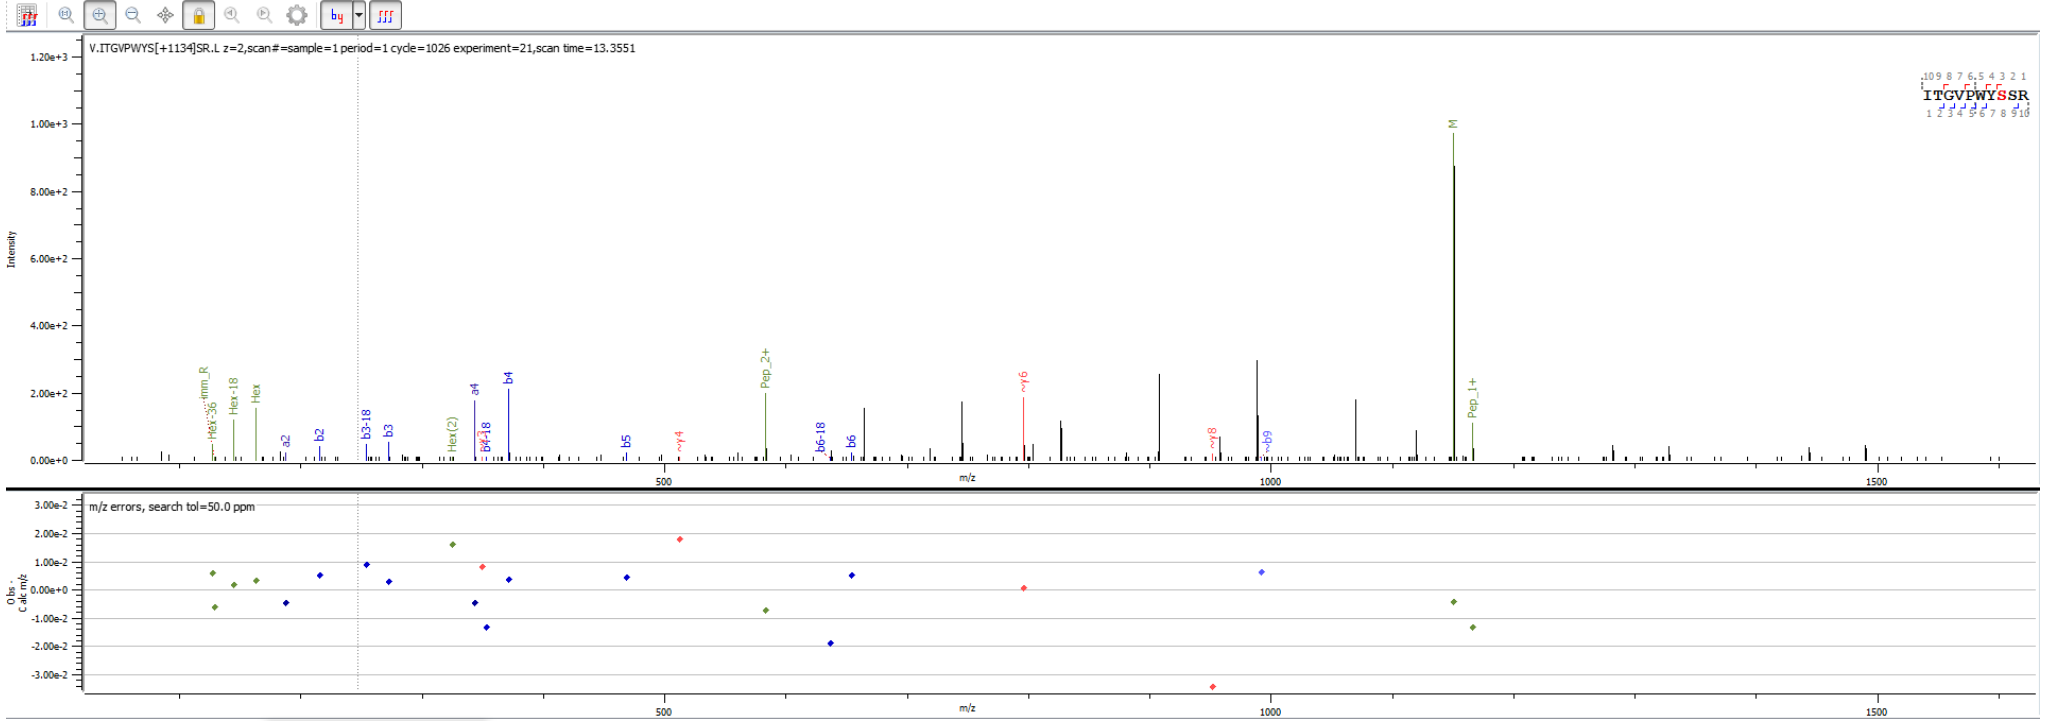

Sample S2 V.ITGVPWYS[+1134.370]SR.L

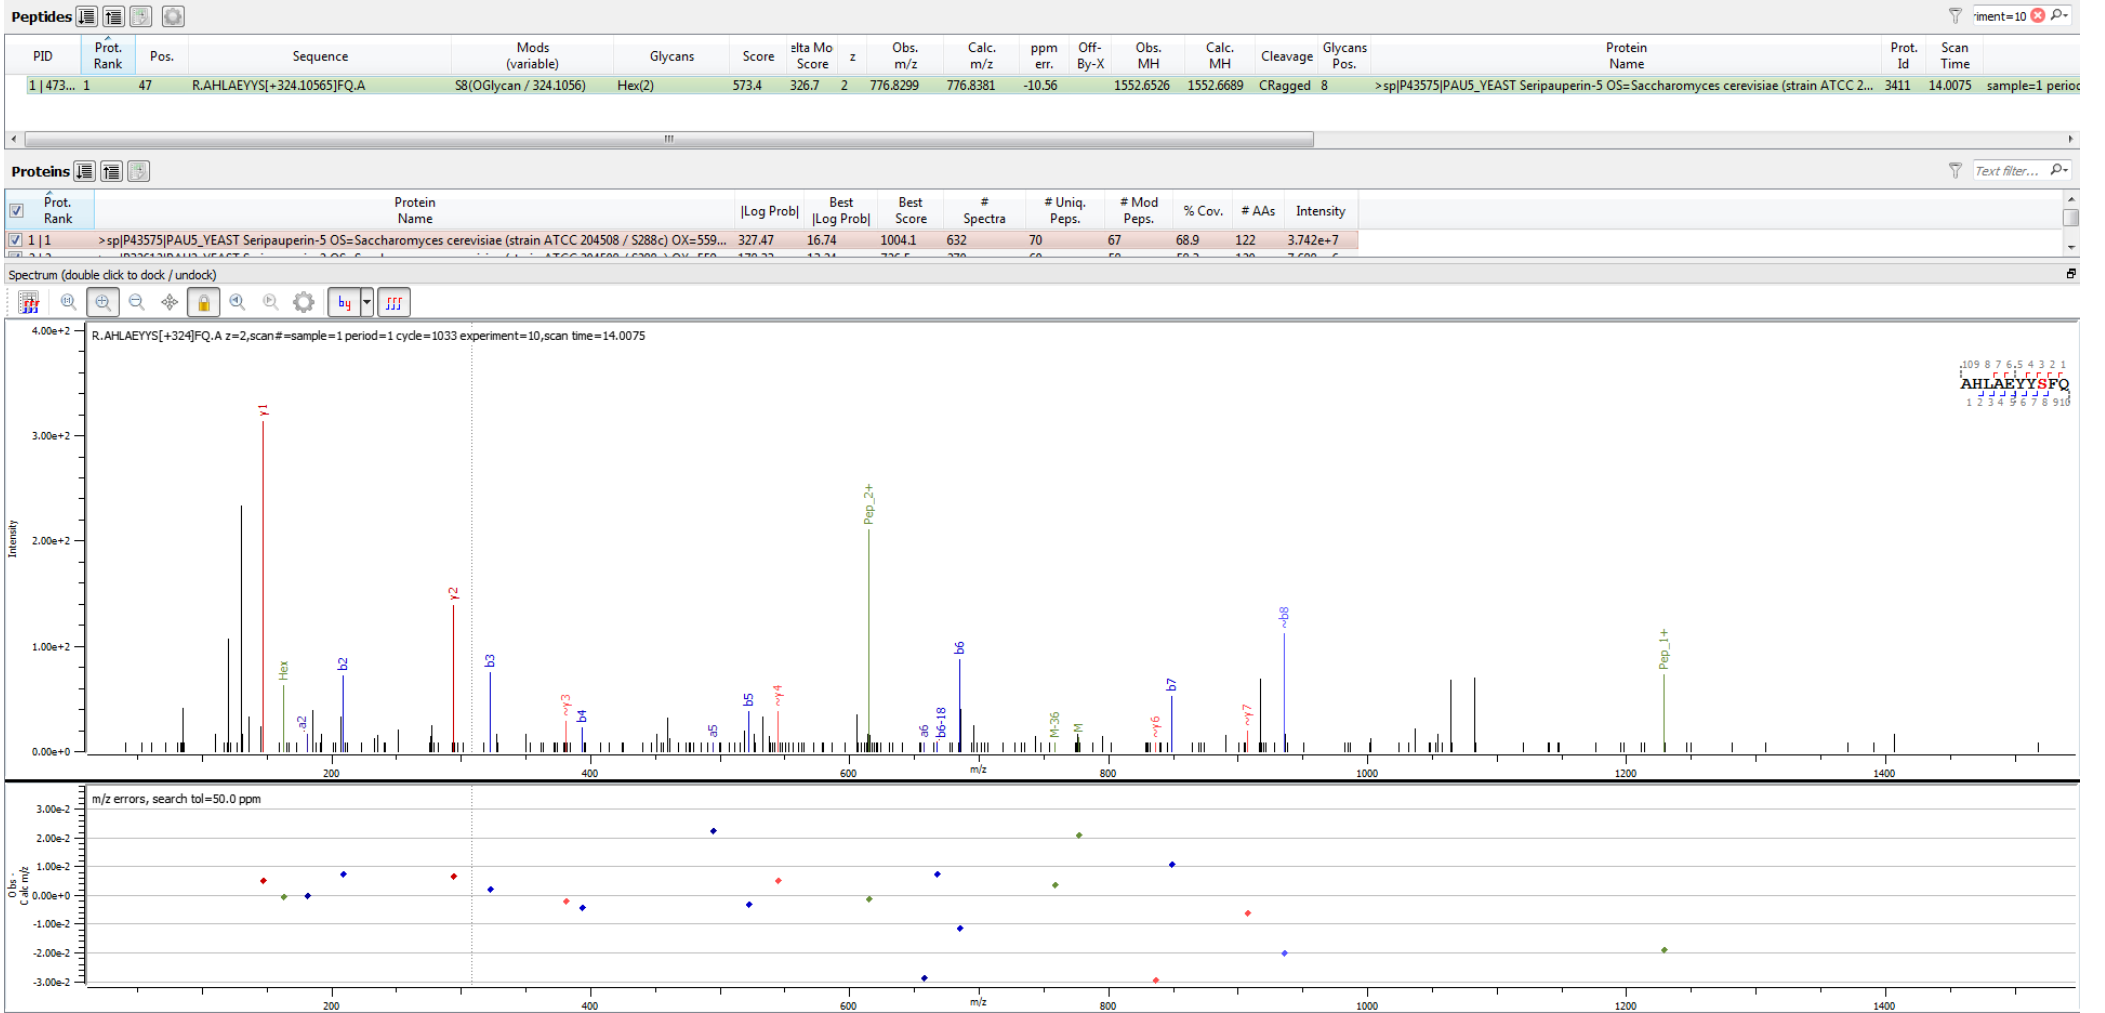

Sample S1 R.AHLAEYYS[+324.106]FQ.A



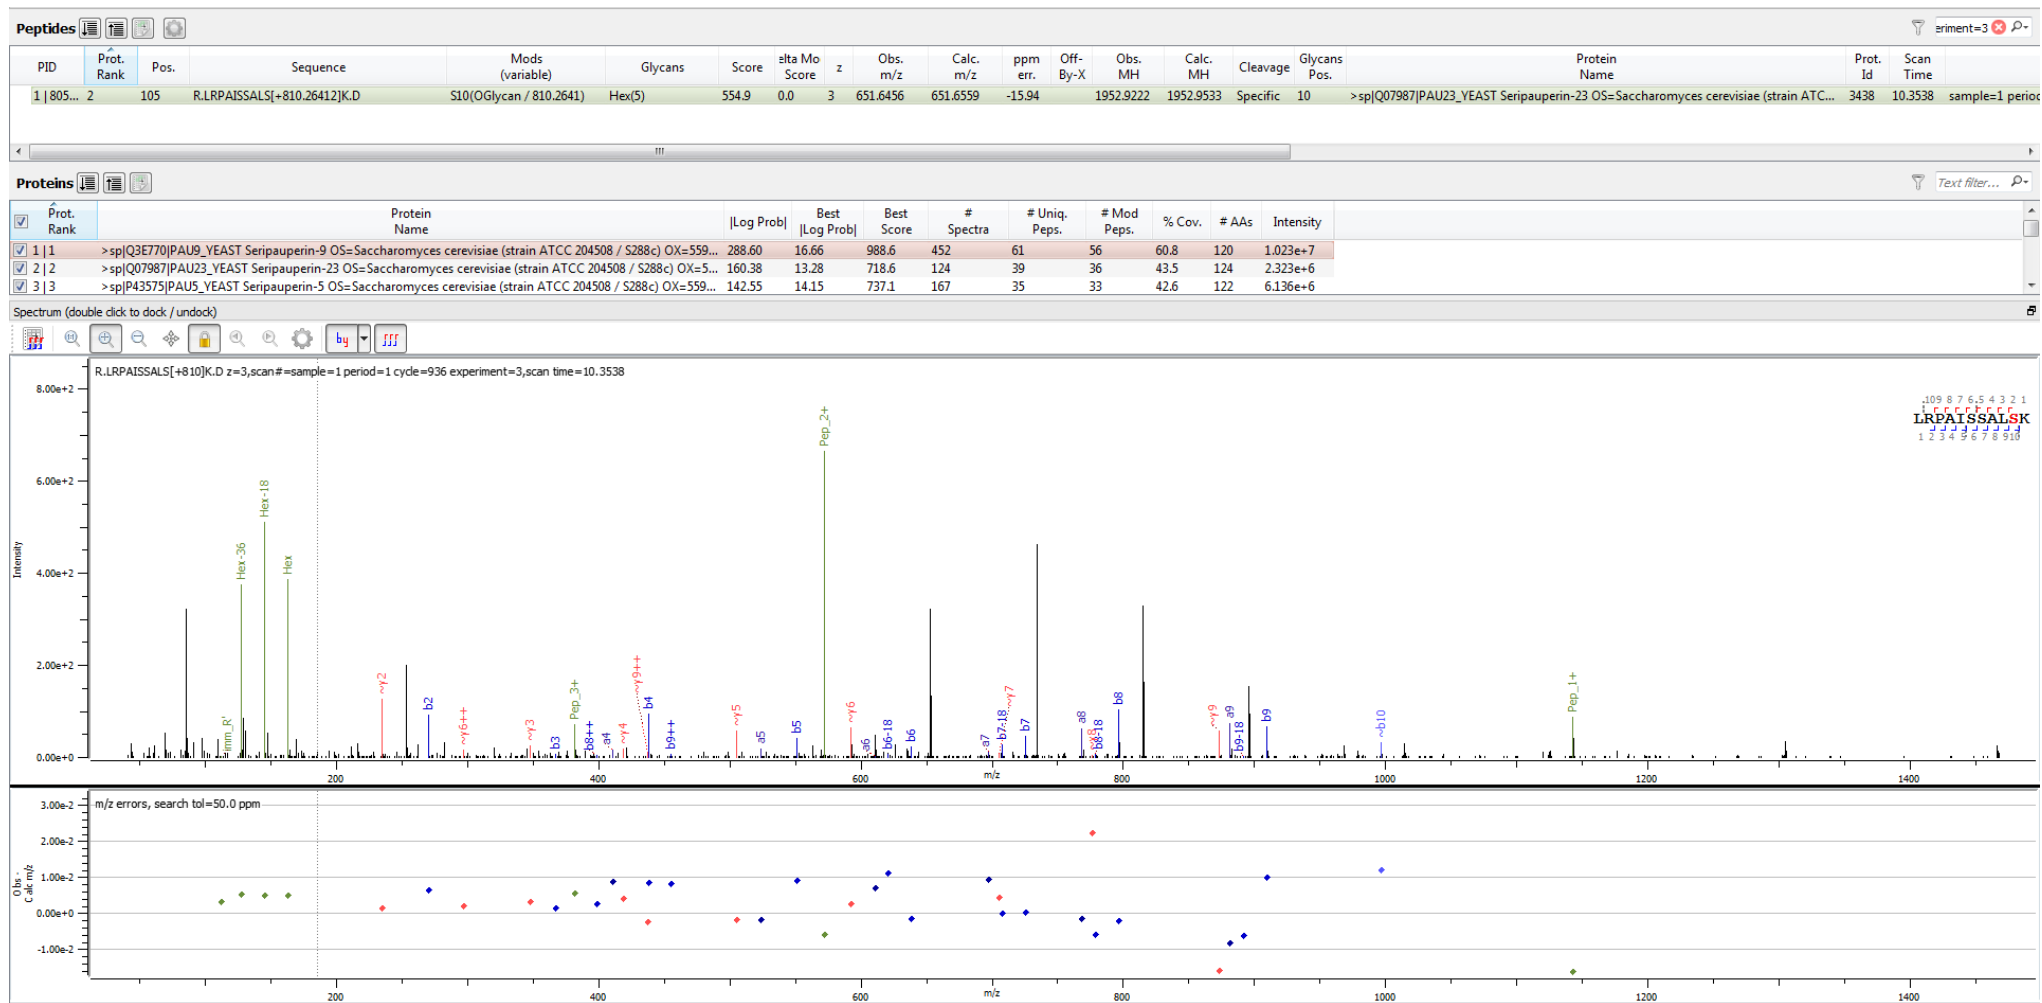





| PID | Prot. Rank | Pos. | Sequence | Mods (variable)              | Glycans                 | Score  | delta Mo Score | z   | Obs. m/z | Calc. m/z | ppm err. | Off-By-X | Obs. MH   | Calc. MH  | Cleavage | Glycans Pos. | Protein Name                                                                      | Prot. Id | Scan Time |
|-----|------------|------|----------|------------------------------|-------------------------|--------|----------------|-----|----------|-----------|----------|----------|-----------|-----------|----------|--------------|-----------------------------------------------------------------------------------|----------|-----------|
| 1   | 1163...    | 4    | 105      | R.LRPAISS[+1134.36976]ALSK.D | S7(OGlycan / 1134.3698) | Hex(7) | 393.5          | 3.6 | 3        | 759.6760  | 759.6912 | -19.95   | 2277.0135 | 2277.0589 | Specific | 7            | >sp Q07987 PAU23_YEAST Seripauperin-23 OS=Saccharomyces cerevisiae (strain ATC... | 3438     | 9.9396    |

| Prot. Rank | Protein Name                                                                                            | [Log Prob] | Best [Log Prob] | Best Score | # Spectra | # Uniq. Peps. | # Mod Peps. | % Cov. | # AAs | Intensity |
|------------|---------------------------------------------------------------------------------------------------------|------------|-----------------|------------|-----------|---------------|-------------|--------|-------|-----------|
| 1          | >sp P43575 PAU5_YEAST Seripauperin-5 OS=Saccharomyces cerevisiae (strain ATCC 204508 / S288c) OX=559... | 327.47     | 16.74           | 1004.1     | 632       | 70            | 67          | 68.9   | 122   | 3.742e+7  |

Spectrum (double click to dock / undock)

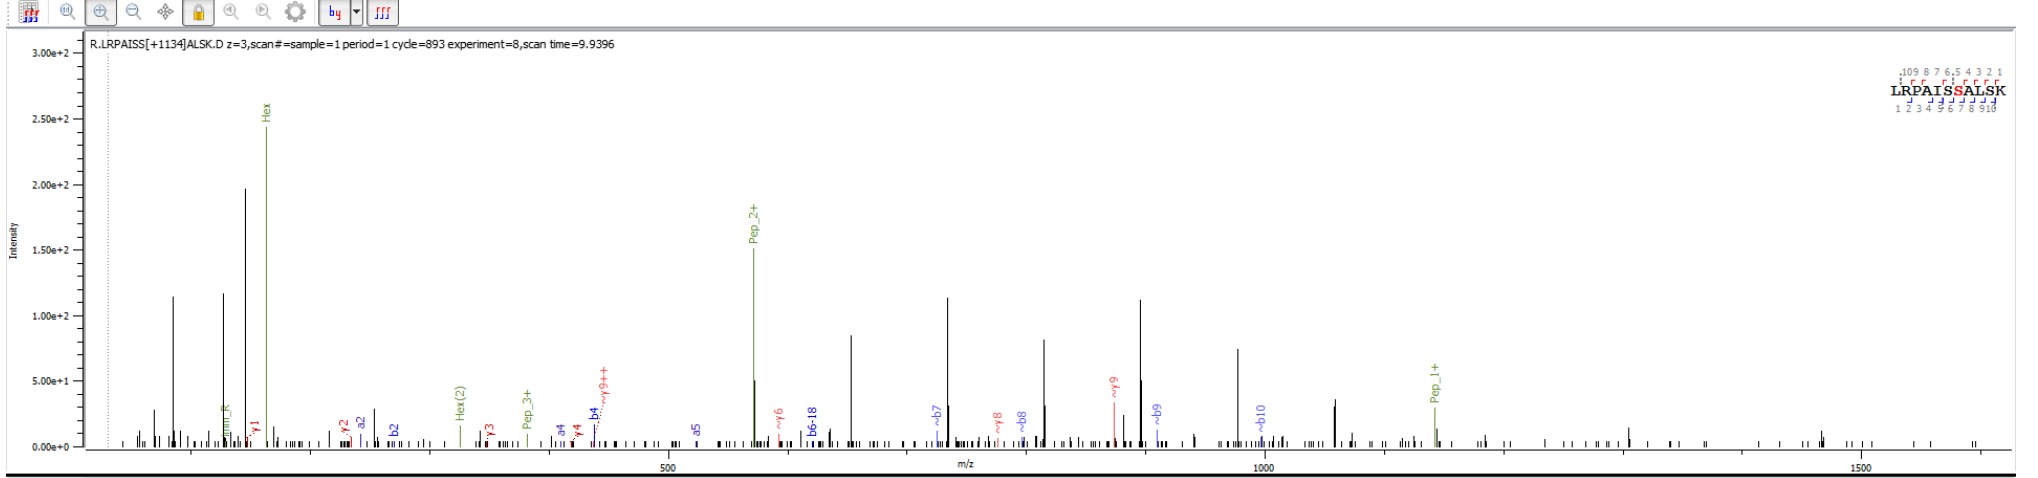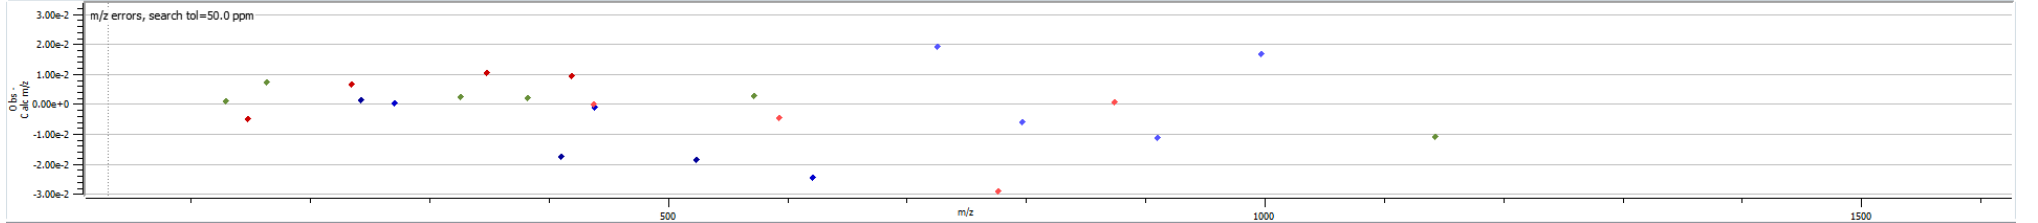

Sample S1 R.LRPAISS[+1134.370]ALSK.D

| PID | Prot. Rank | Pos. | Sequence | Mods (variable)              | Glycans                 | Score  | delta Mo Score | z   | Obs. m/z | Calc. m/z | ppm err. | Off-By-X | Obs. MH   | Calc. MH  | Cleavage | Glycans Pos. | Protein Name                                                                      | Prot. Id | Scan Time |                 |
|-----|------------|------|----------|------------------------------|-------------------------|--------|----------------|-----|----------|-----------|----------|----------|-----------|-----------|----------|--------------|-----------------------------------------------------------------------------------|----------|-----------|-----------------|
| 1   | 165...     | 2    | 105      | R.LRPAIS[+1296.42259]SALSK.D | S6(Oglycan / 1296.4226) | Hex(8) | 230.7          | 2.0 | 3        | 813.6931  | 813.7088 | -19.29   | 2439.0647 | 2439.1117 | Specific | 6            | >sp POCE85 PAU19_YEAST Seripauperin-19 OS=Saccharomyces cerevisiae (strain ATC... | 3420     | 9.7650    | sample=1 period |

| Prot. Rank | Protein Name                                                                                              | [Log Prob] | Best [Log Prob] | Best Score | # Spectra | # Uniq. Peps. | # Mod Peps. | % Cov. | # AAs | Intensity |
|------------|-----------------------------------------------------------------------------------------------------------|------------|-----------------|------------|-----------|---------------|-------------|--------|-------|-----------|
| 1          | >sp P32612 PAU2_YEAST Seripauperin-2 OS=Saccharomyces cerevisiae (strain ATCC 204508 / S288c) OX=559...   | 304.25     | 17.48           | 982.9      | 381       | 64            | 61          | 67.5   | 120   | 1.839e+7  |
| 2          | >sp D0CFRS1B PAU19_YEAST Seripauperin-19 OS=Saccharomyces cerevisiae (strain ATCC 204508 / S288c) OX=5... | 138.61     | 11.51           | 683.8      | 93        | 32            | 31          | 42.7   | 124   | 3.148e+6  |

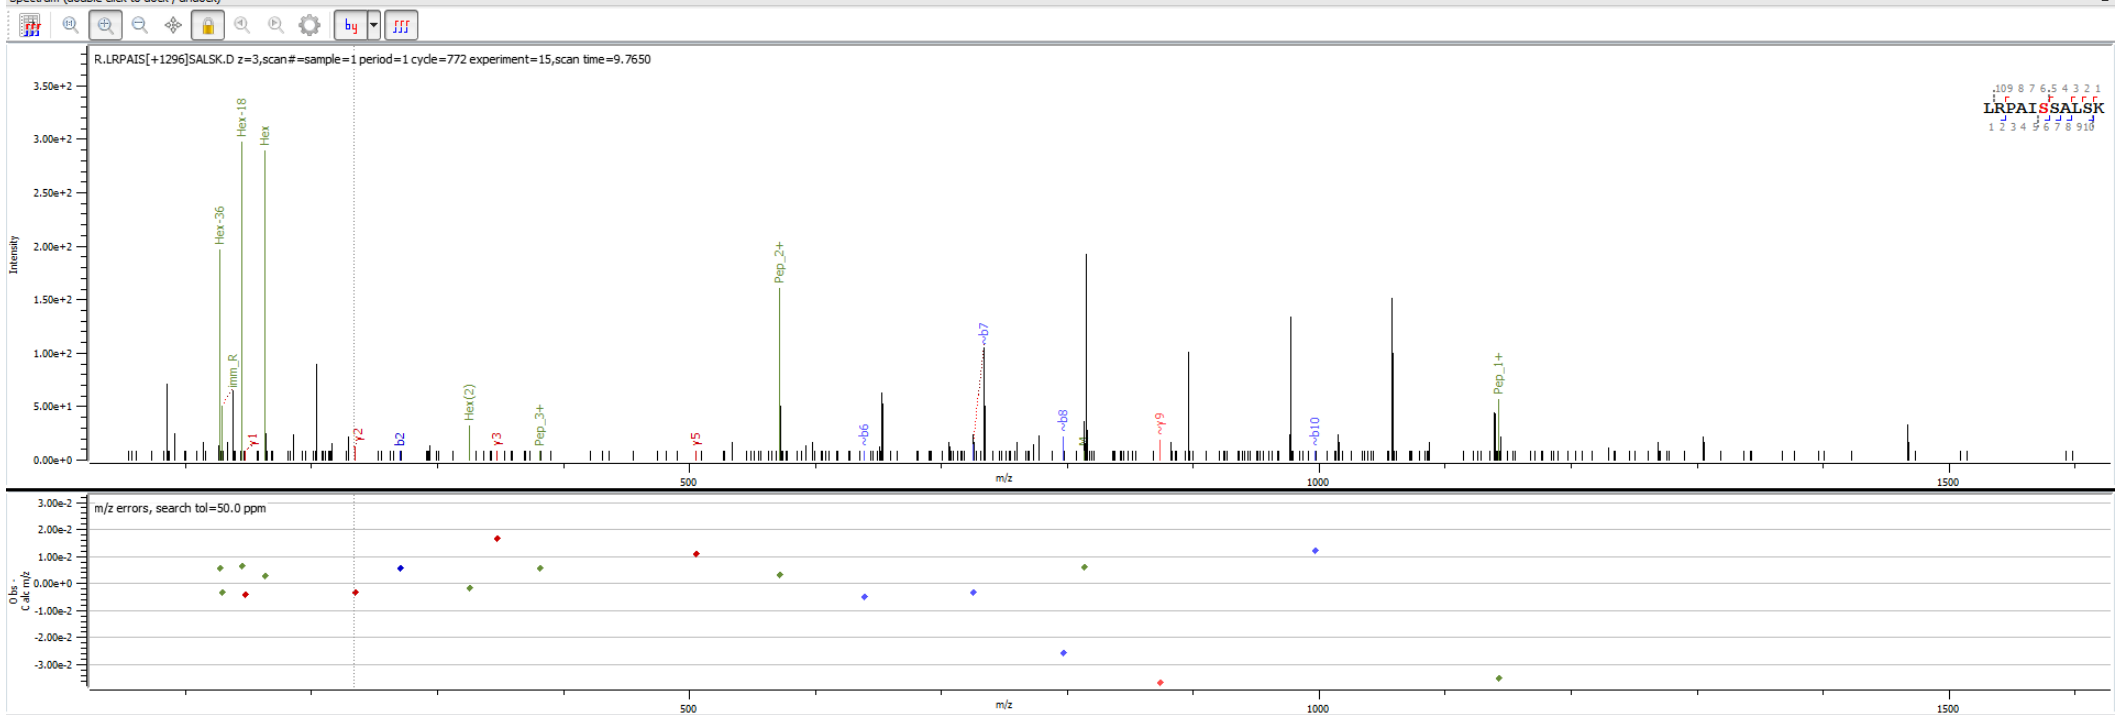

Sample S4 R.LRPAIS[+1296.423]SALSK.D

| PID        | Prot. Rank | Pos. | Sequence                 | Mods (variable)        | Glycans | Score | delta Mo Score | z | Obs. m/z | Calc. m/z | ppm err. | Off-By-X | Obs. MH   | Calc. MH  | Cleavage  | Glycans Pos. | Protein Name                                                                       | Prot. Id | Scan Time               |
|------------|------------|------|--------------------------|------------------------|---------|-------|----------------|---|----------|-----------|----------|----------|-----------|-----------|-----------|--------------|------------------------------------------------------------------------------------|----------|-------------------------|
| 1   112... | 1          | 92   | M.ITGVPWYSS[+648.211]R.L | S9(Oglycan / 648.2113) | Hex(4)  | 551.3 | 0.0            | 2 | 907.3915 | 907.4093  | -19.65   |          | 1813.7757 | 1813.8113 | NRagged 9 |              | >sp P32612 PAU2_YEAST Seripauperin-2 OS=Saccharomyces cerevisiae (strain ATCC 2... | 3410     | 13.8662 sample=1 period |

| Prot. Rank | Protein Name                                                                                             | [Log Prob] | Best [Log Prob] | Best Score | # Spectra | # Uniq. Peps. | # Mod Peps. | % Cov. | # AAs | Intensity |
|------------|----------------------------------------------------------------------------------------------------------|------------|-----------------|------------|-----------|---------------|-------------|--------|-------|-----------|
| 2   2      | >sp P0CE85 PAU19_YEAST Seripauperin-19 OS=Saccharomyces cerevisiae (strain ATCC 204508 / S288c) OX=5...  | 138.61     | 11.51           | 683.8      | 93        | 32            | 31          | 42.7   | 124   | 3.148e+6  |
| 2   3      | >sp D13575 DAL15_YEAST Seripauperin-5 OS=Saccharomyces cerevisiae (strain ATCC 204508 / S288c) OX=550... | 120.60     | 12.22           | 721.6      | 114       | 28            | 27          | 53.2   | 122   | 7.278e+6  |

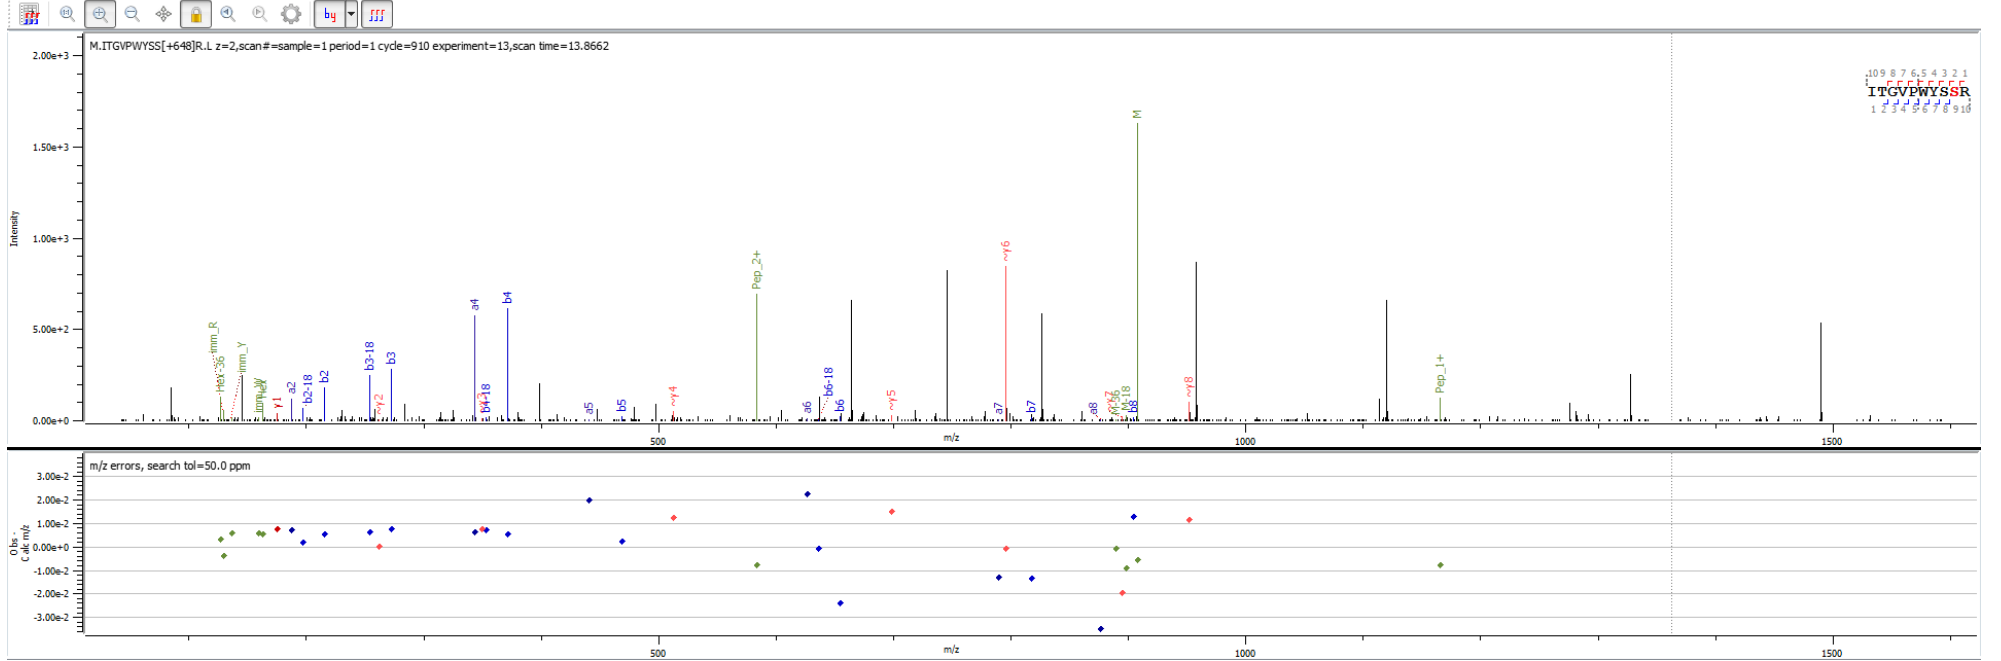

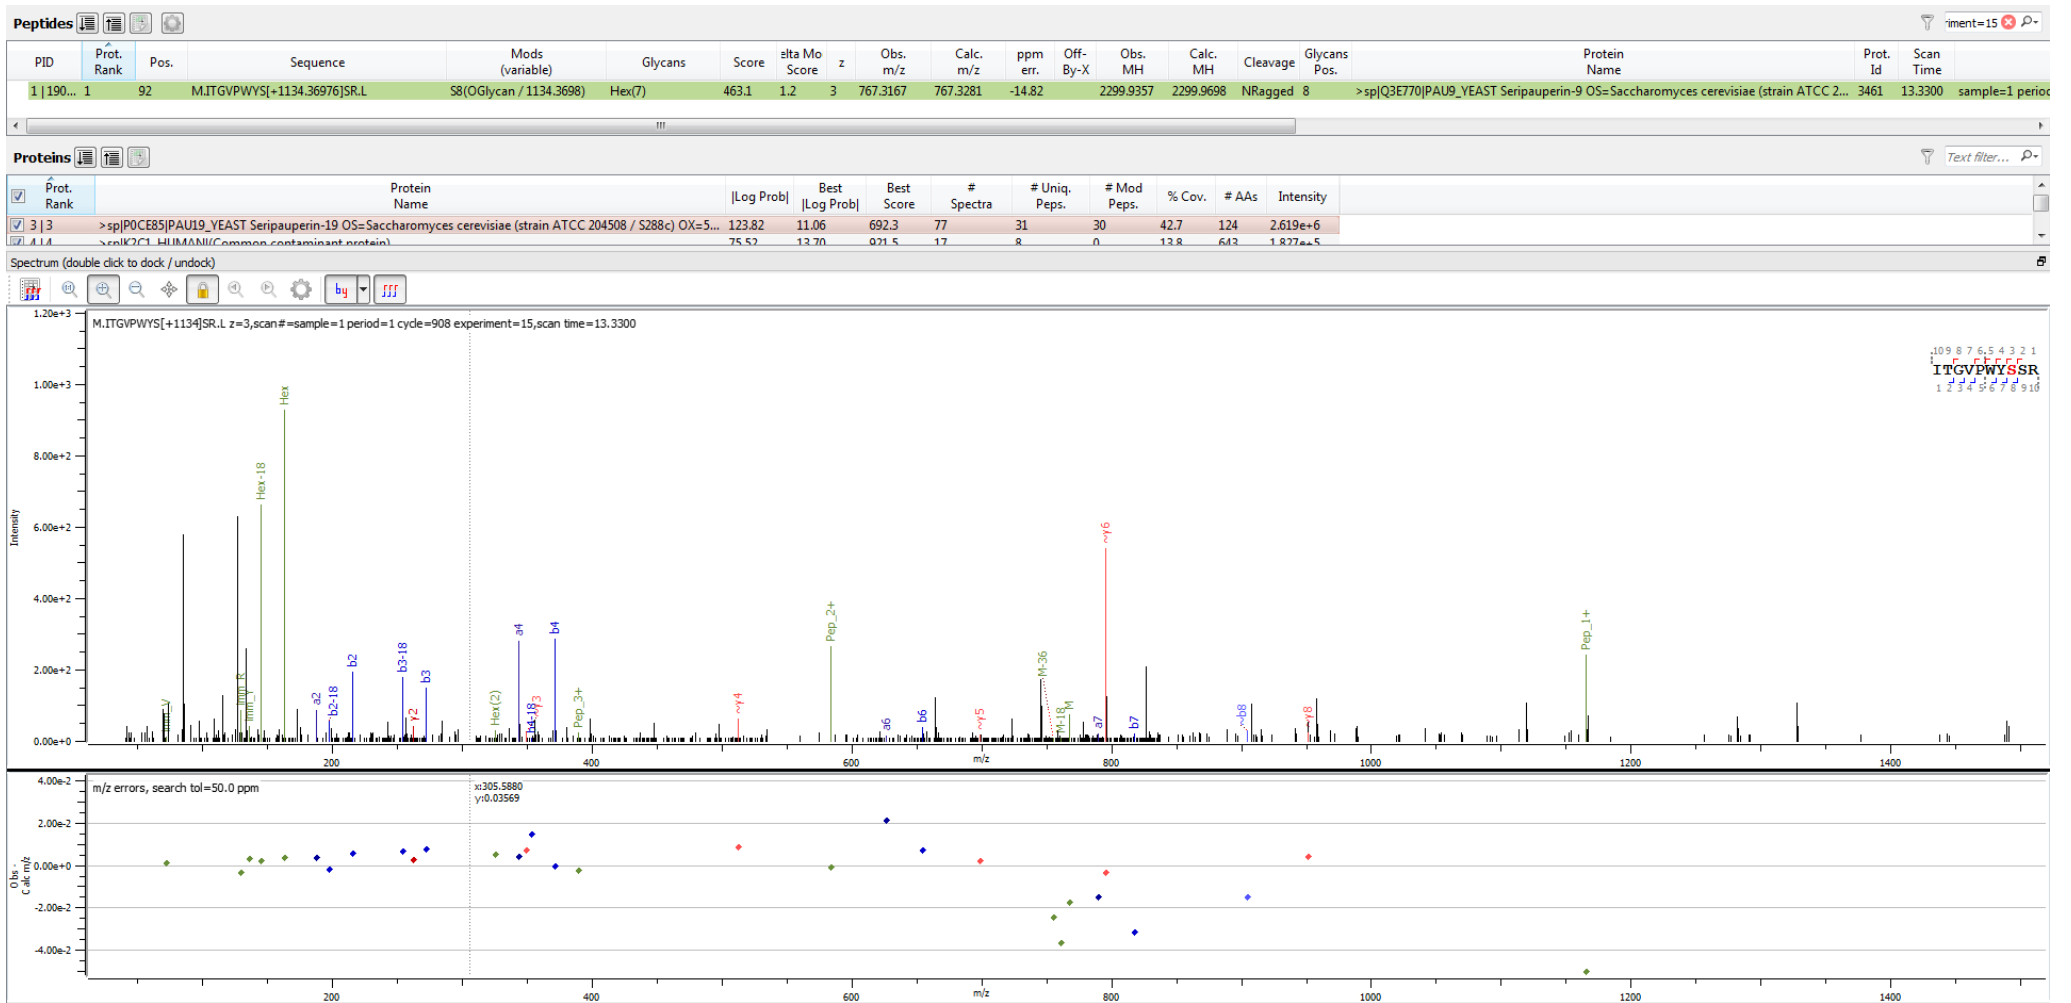

Sample S3 M.ITGVPWYS[+1134.370]SR.L

| PID | Prot. Rank | Pos. | Sequence                    | Mods (variable)         | Glycans | Score | alta Mo Score | z | Obs. m/z | Calc. m/z | ppm err. | Off-By-X | Obs. MH   | Calc. MH  | Cleavage | Glycans Pos. | Protein Name                                                                       | Prot. Id | Scan Time |
|-----|------------|------|-----------------------------|-------------------------|---------|-------|---------------|---|----------|-----------|----------|----------|-----------|-----------|----------|--------------|------------------------------------------------------------------------------------|----------|-----------|
| 1   | 1          | 92   | M.ITGVPWYS[+1296.42259]SR.L | S8(OGlycan / 1296.4226) | Hex(8)  | 474.5 | 1.2           | 3 | 821.3375 | 821.3457  | -10.00   |          | 2461.9980 | 2462.0226 | NRagged  | 8            | >sp P32612 PAU2_YEAST Seripauperin-2_OS=Saccharomyces cerevisiae (strain ATCC 2... | 3410     | 13.1470   |

| Prot. Rank | Protein Name                                                                                             | [Log Prob] | Best [Log Prob] | Best Score | # Spectra | # Uniq. Peps. | # Mod Peps. | % Cov. | # AAs | Intensity |
|------------|----------------------------------------------------------------------------------------------------------|------------|-----------------|------------|-----------|---------------|-------------|--------|-------|-----------|
| 1          | >sp P32612 PAU2_YEAST Seripauperin-2_OS=Saccharomyces cerevisiae (strain ATCC 204508 / S288c) OX=559...  | 304.25     | 17.48           | 982.9      | 381       | 64            | 61          | 67.5   | 120   | 1.839e+7  |
| 2          | >sp D0CER5 DPA110_YEAST Seripauperin-10_OS=Saccharomyces cerevisiae (strain ATCC 204508 / S288c) OX=5... | 138.61     | 11.51           | 683.8      | 92        | 32            | 31          | 42.7   | 124   | 3.148e+6  |

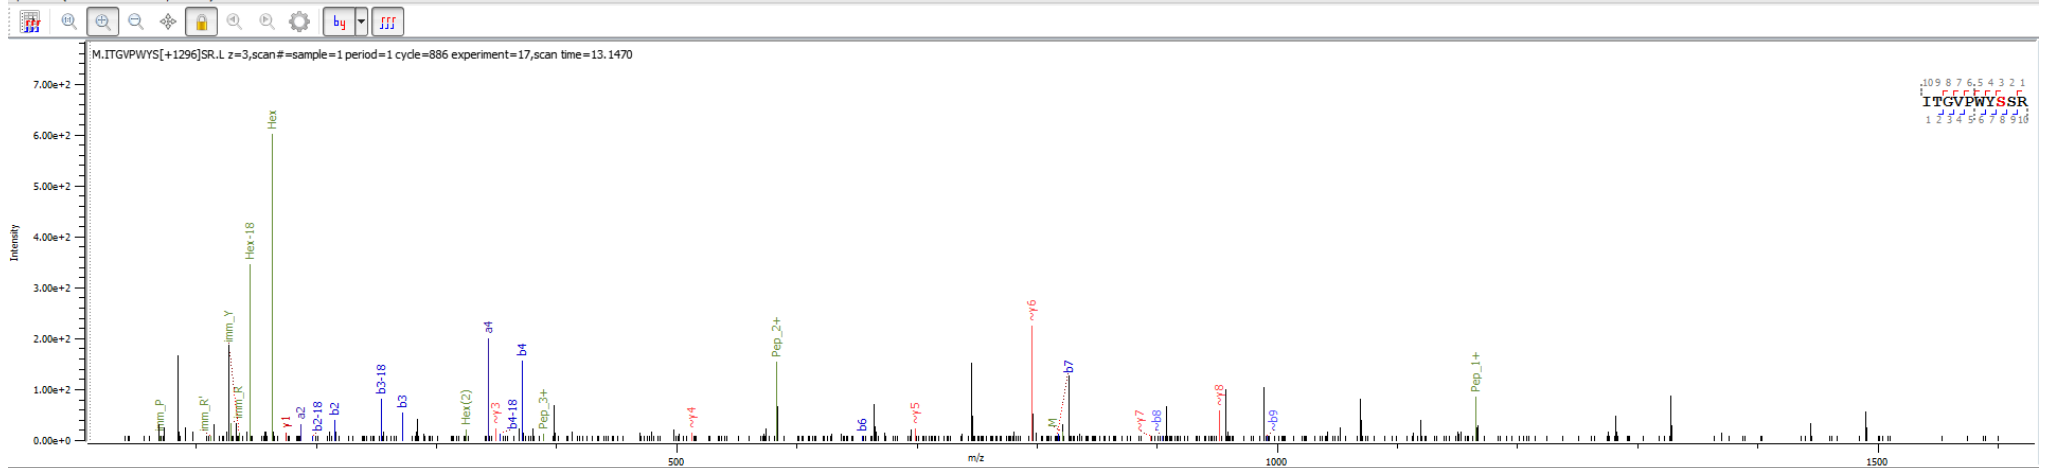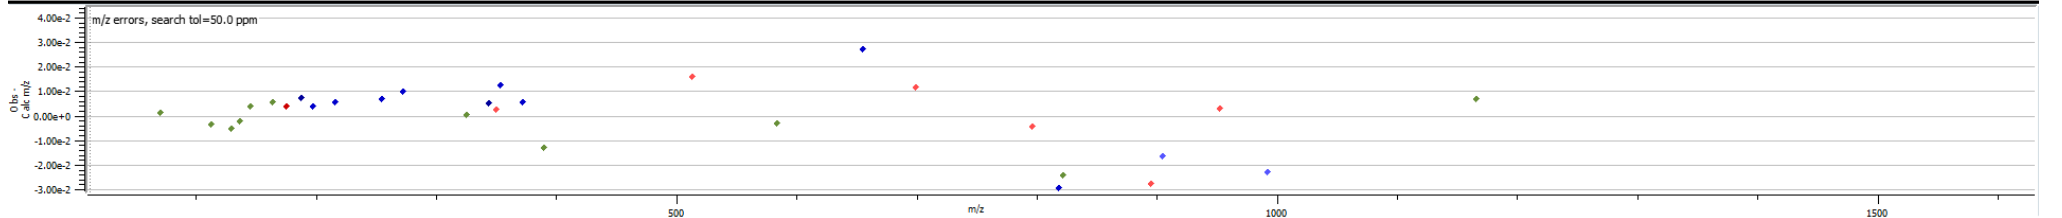

Sample S4 M.ITGVPWYS[+1296.423]SR.L

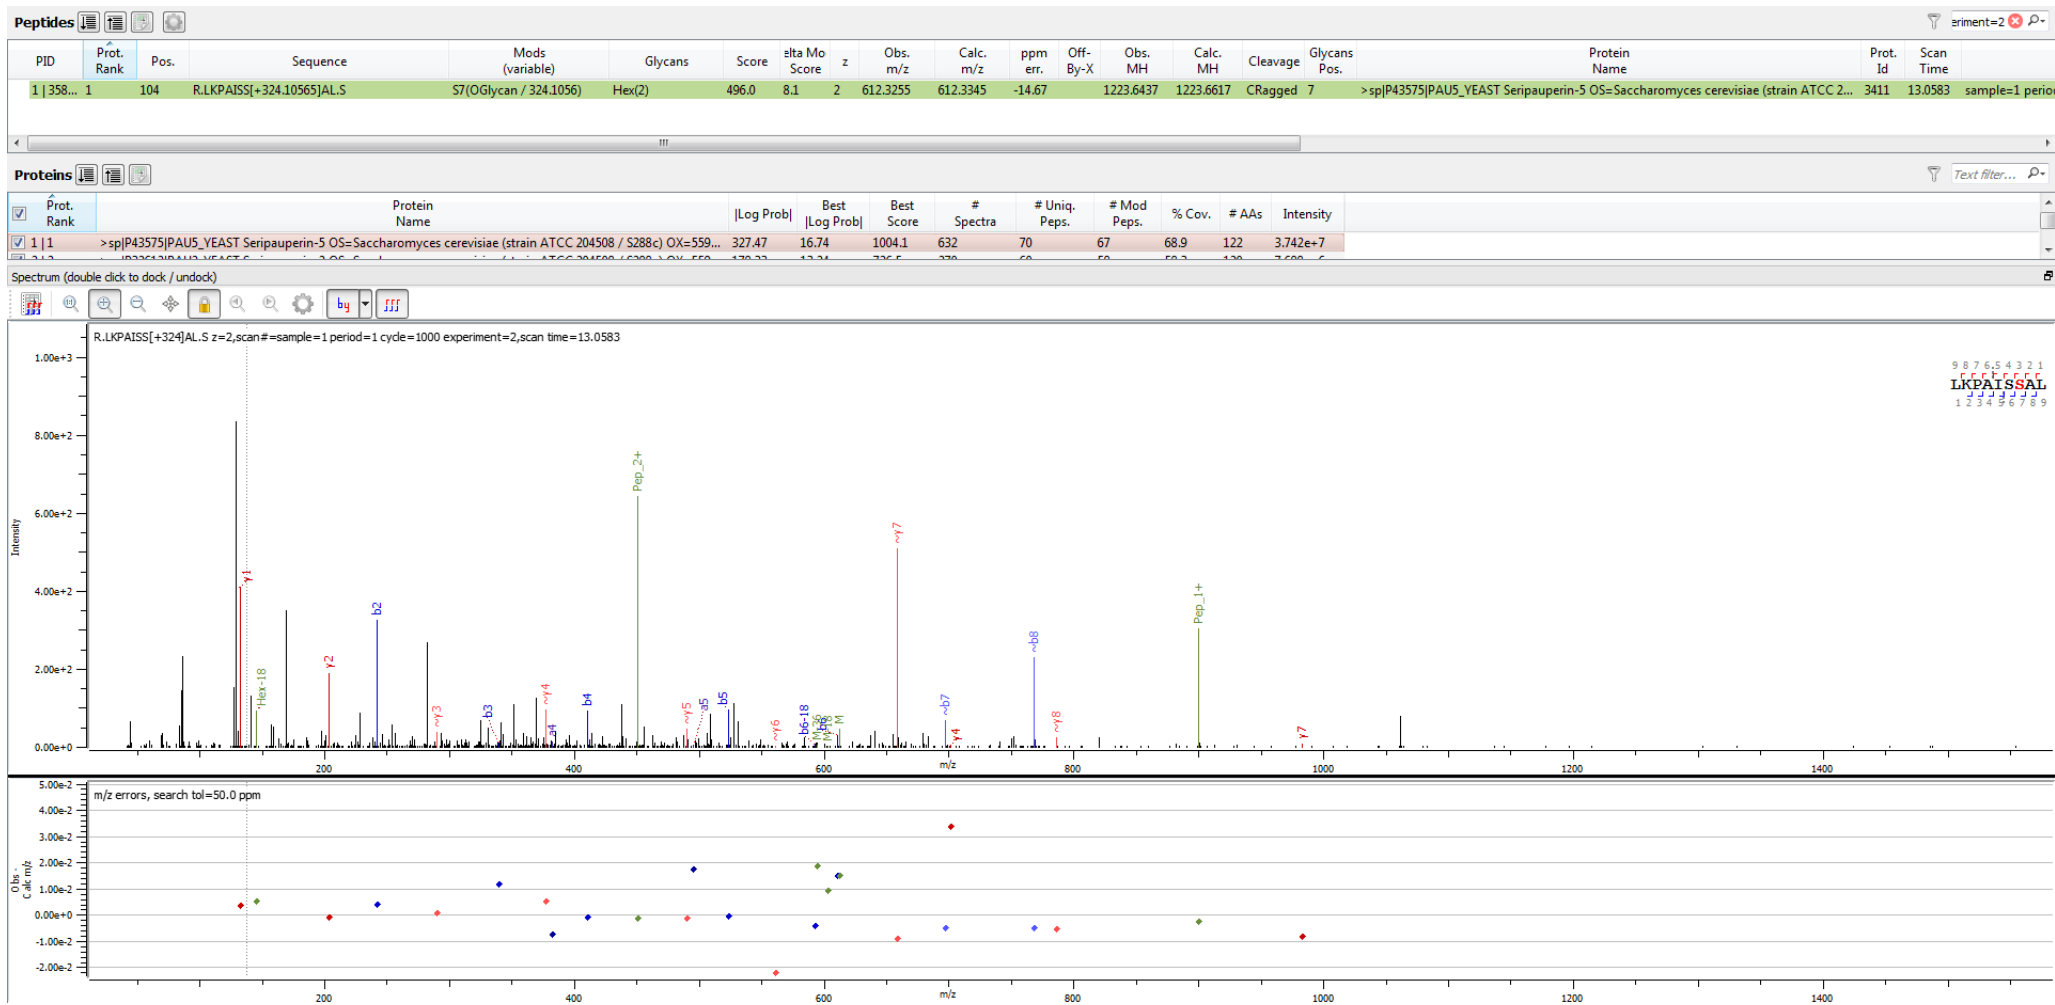

Sample S1 R.LKPAISS[+324.106]AL.S

| PID        | Prot. Rank | Pos. | Sequence                  | Mods (variable)        | Glycans | Score | delta Mo Score | z | Obs. m/z | Calc. m/z | ppm err. | Off-By-X | Obs. MH   | Calc. MH  | Cleavage  | Glycans Pos. | Protein Name                                                                       | Prot. Id | Scan Time |
|------------|------------|------|---------------------------|------------------------|---------|-------|----------------|---|----------|-----------|----------|----------|-----------|-----------|-----------|--------------|------------------------------------------------------------------------------------|----------|-----------|
| 1   315... | 1          | 104  | R.LKPAIS[+486.15847]SAL.S | S6(Oglycan / 486.1585) | Hex(3)  | 481.0 | 2.0            | 2 | 693.3480 | 693.3609  | -18.64   |          | 1385.6887 | 1385.7145 | Cragged 6 |              | >sp P43575 PAU5_YEAST Seripauperin-5 OS=Saccharomyces cerevisiae (strain ATCC 2... | 3411     | 12.7191   |

| Prot. Rank | Protein Name                                                                                            | [Log Prob] | Best [Log Prob] | Best Score | # Spectra | # Uniq. Peps. | # Mod Peps. | % Cov. | # AAs | Intensity |
|------------|---------------------------------------------------------------------------------------------------------|------------|-----------------|------------|-----------|---------------|-------------|--------|-------|-----------|
| 1   1      | >sp P43575 PAU5_YEAST Seripauperin-5 OS=Saccharomyces cerevisiae (strain ATCC 204508 / S288c) OX=559... | 327.47     | 16.74           | 1004.1     | 632       | 70            | 67          | 68.9   | 122   | 3.742e+7  |

Spectrum (double click to dock / undock)

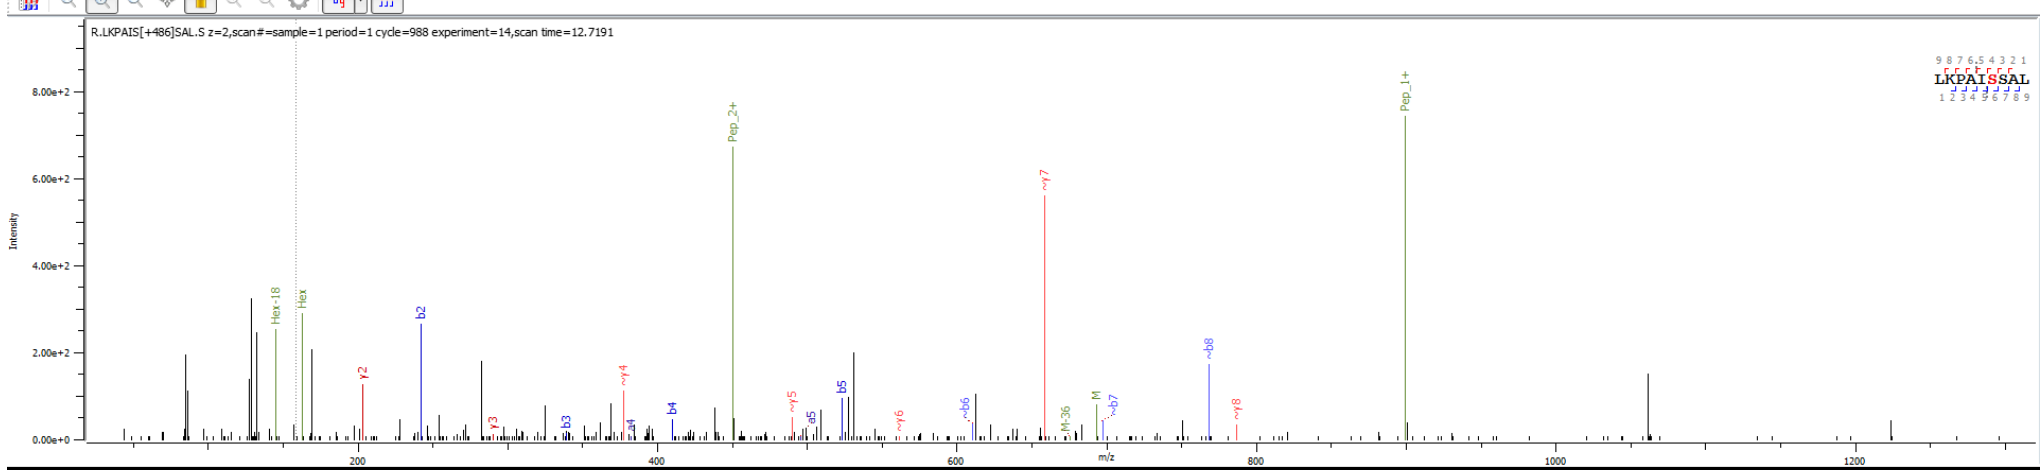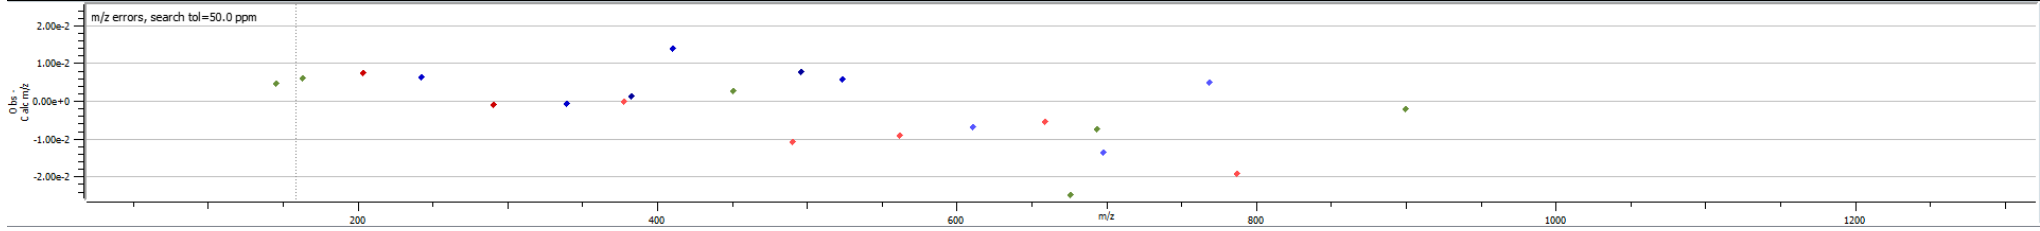

Sample S1 R.LKPAIS[+486.158]SAL.S

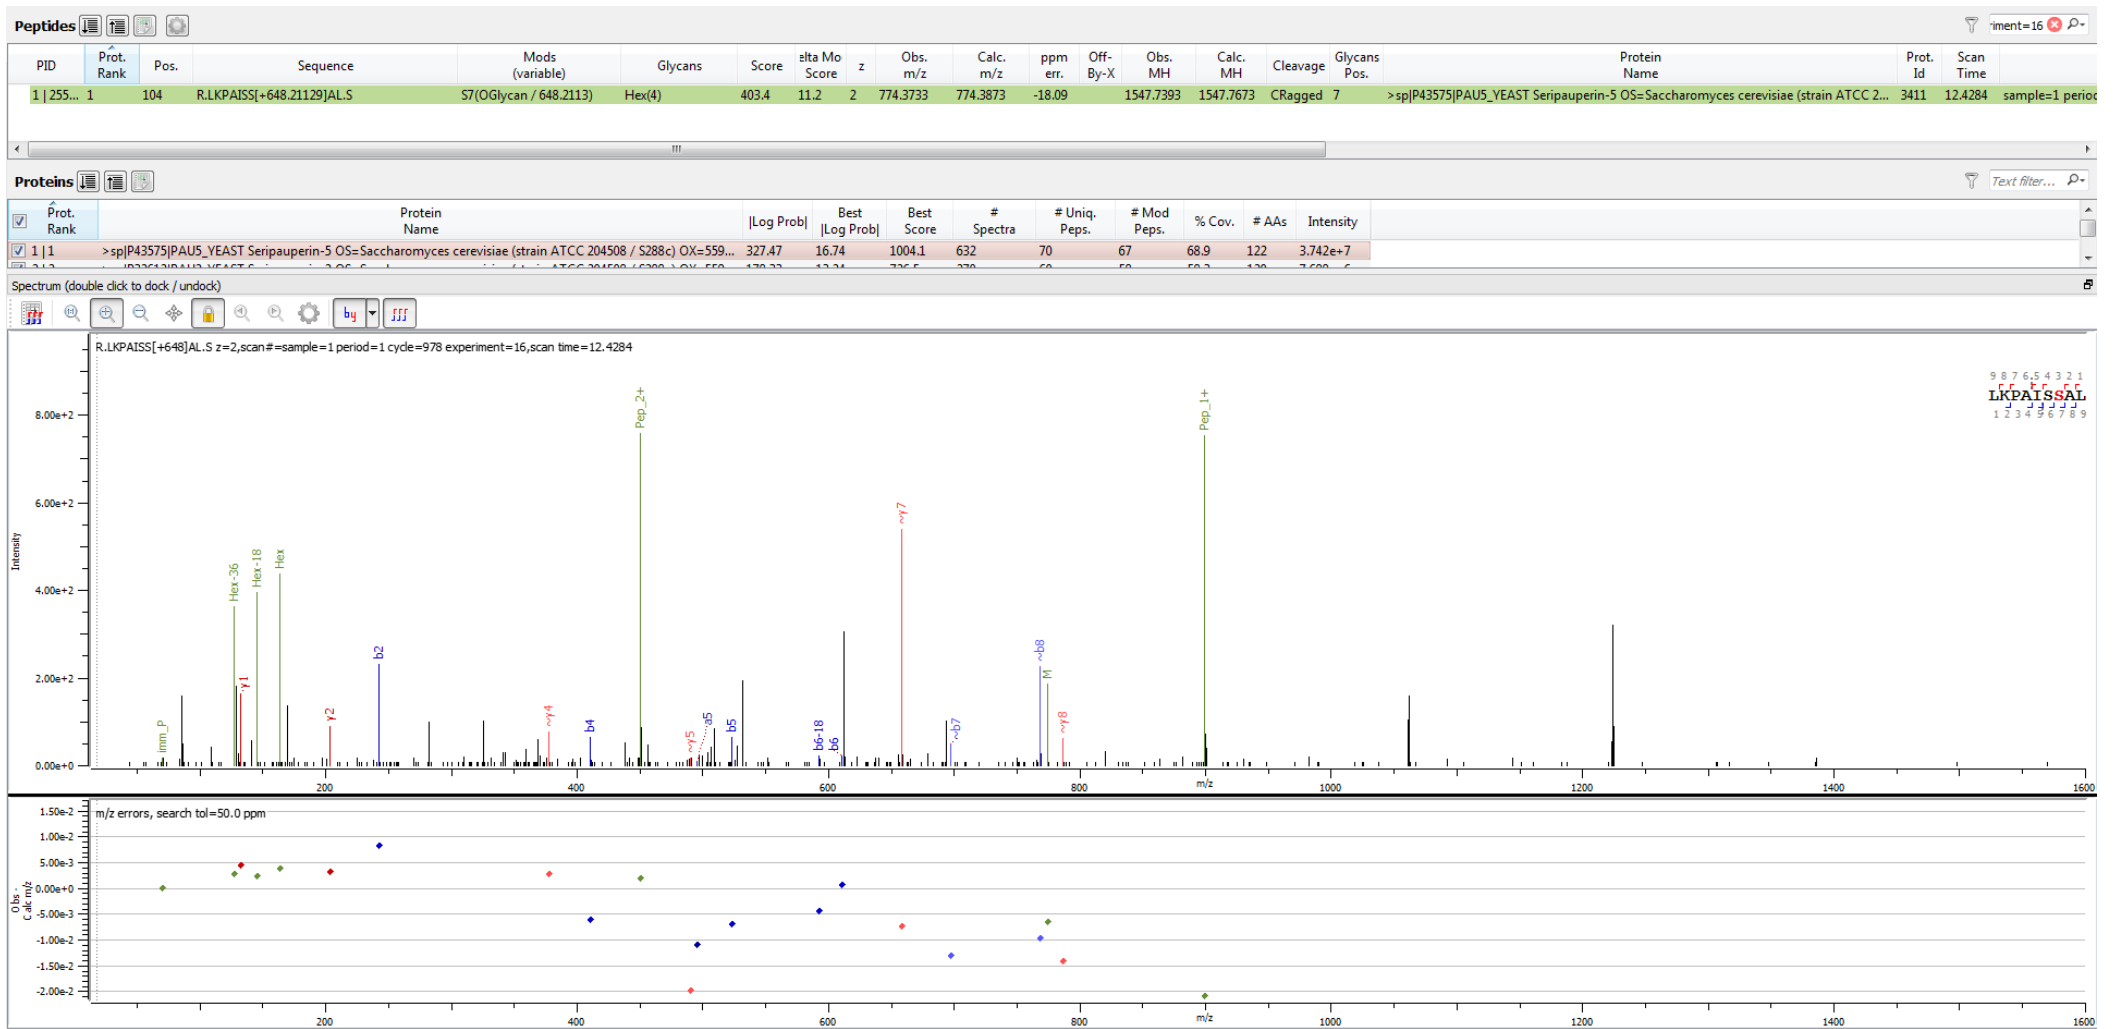

Sample S1 R.LKPAISS[+648.211]AL.S



| PID | Prot. Rank | Pos. | Sequence | Mods (variable)            | Glycans                | Score  | delta Mo Score | z   | Obs. m/z | Calc. m/z | ppm err.  | Off-By-X | Obs. MH   | Calc. MH  | Cleavage  | Glycans Pos. | Protein Name                                                                          | Prot. Id | Scan Time |                 |
|-----|------------|------|----------|----------------------------|------------------------|--------|----------------|-----|----------|-----------|-----------|----------|-----------|-----------|-----------|--------------|---------------------------------------------------------------------------------------|----------|-----------|-----------------|
| 1   | 1189...    | 17   | 93       | M.LTMVPWYS[+972.31694]SR.L | S8(OGlycan / 972.3169) | Hex(6) | 444.4          | 1.2 | 2        | 1106.4530 | 1106.4716 | -16.89   | 2211.8986 | 2211.9360 | NRagged 8 |              | >sp Q12218 TIR4_YEAST Cell wall protein TIR4 OS=Saccharomyces cerevisiae (strain A... | 4963     | 14.7199   | sample=1 period |

| Prot. Rank | Protein Name                                                                                            | [Log Prob] | Best [Log Prob] | Best Score | # Spectra | # Uniq. Peps. | # Mod Peps. | % Cov. | # AAs | Intensity |
|------------|---------------------------------------------------------------------------------------------------------|------------|-----------------|------------|-----------|---------------|-------------|--------|-------|-----------|
| 1          | >sp P32612 PAU2_YEAST Seripauperin-2 OS=Saccharomyces cerevisiae (strain ATCC 204508 / S288c) OX=559... | 304.25     | 17.48           | 982.9      | 381       | 64            | 61          | 67.5   | 120   | 1.839e+7  |
| 2          | >sp P32612 PAU2_YEAST Seripauperin-2 OS=Saccharomyces cerevisiae (strain ATCC 204508 / S288c) OX=559... | 138.61     | 11.51           | 683.8      | 92        | 22            | 21          | 42.7   | 124   | 3.148e+6  |

Spectrum (double click to dock / undock)

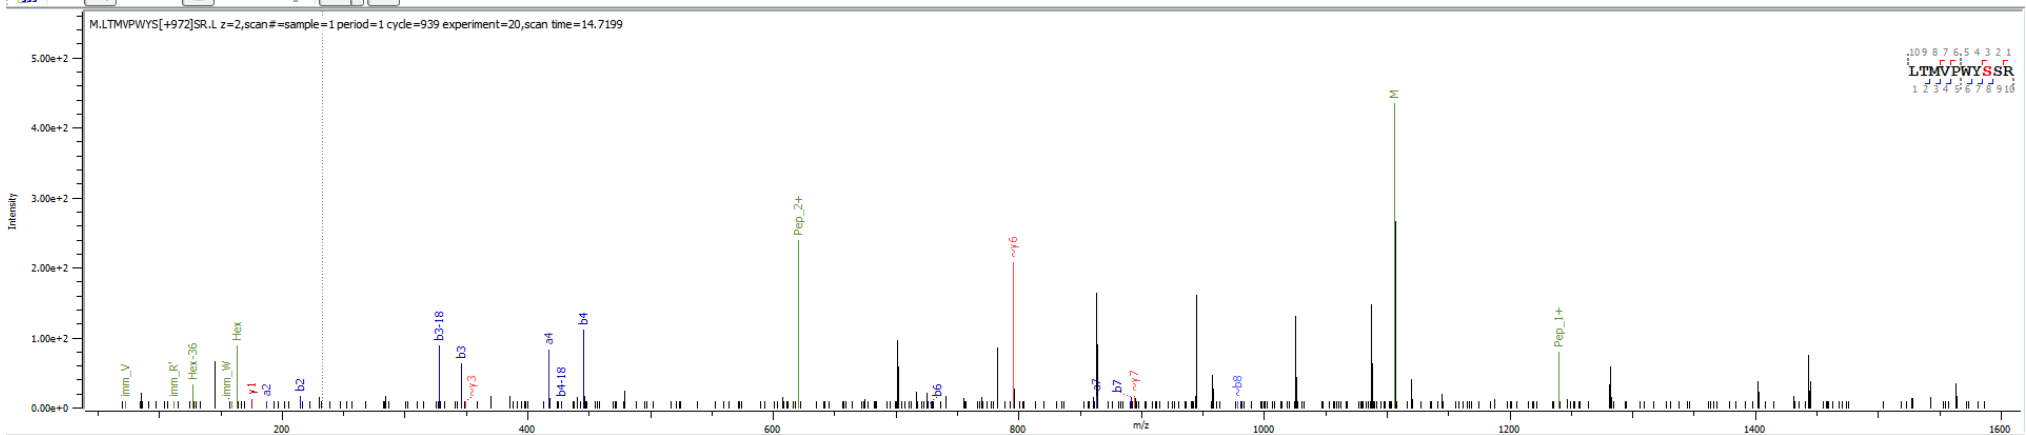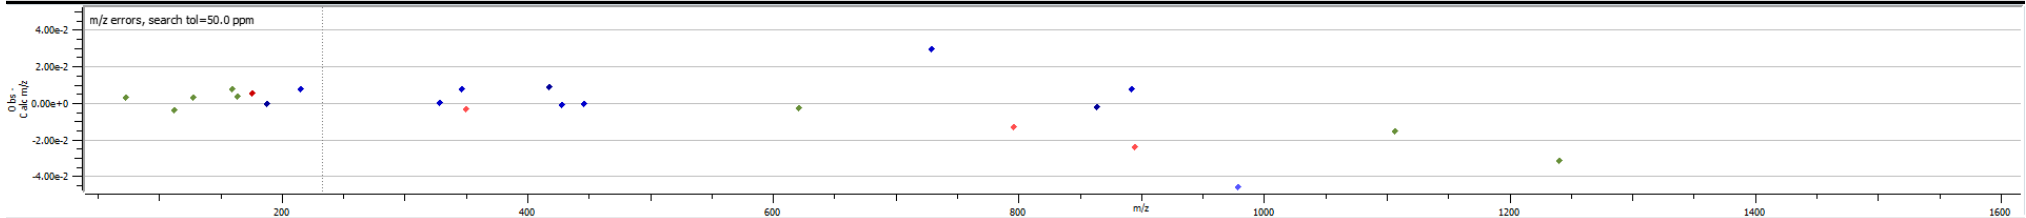

Sample S4 M.LTMVPWYS[+972.317]SR.L

| PID | Prot. Rank | Pos. | Sequence | Mods (variable)             | Glycans                 | Score  | delta Mo Score | z   | Obs. m/z | Calc. m/z | ppm err. | Off-By-X | Obs. MH   | Calc. MH  | Cleavage  | Glycans Pos. | Protein Name                                                                       | Prot. Id | Scan Time |
|-----|------------|------|----------|-----------------------------|-------------------------|--------|----------------|-----|----------|-----------|----------|----------|-----------|-----------|-----------|--------------|------------------------------------------------------------------------------------|----------|-----------|
| 1   | 1897...    | 10   | 92       | M.LTMVPWYS[+1134.36976]SR.L | S8(Oglycan / 1134.3698) | Hex(7) | 384.4          | 1.2 | 3        | 791.9855  | 792.0011 | -19.74   | 2373.9419 | 2373.9888 | NRagged 8 |              | >sp P10863 TIR1_YEAST Cold shock-induced protein TIR1 OS=Saccharomyces cerevisi... | 4256     | 14.9474   |

| Prot. Rank | Protein Name                                                                                            | [Log Prob] | Best [Log Prob] | Best Score | # Spectra | # Uniq. Peps. | # Mod Peps. | % Cov. | # AAs | Intensity |
|------------|---------------------------------------------------------------------------------------------------------|------------|-----------------|------------|-----------|---------------|-------------|--------|-------|-----------|
| 1          | >sp P43575 PAU5_YEAST Seripauperin-5 OS=Saccharomyces cerevisiae (strain ATCC 204508 / S288c) OX=559... | 136.57     | 14.25           | 968.4      | 163       | 30            | 27          | 28.7   | 122   | 1.440e+6  |

Spectrum (double click to dock / undock)

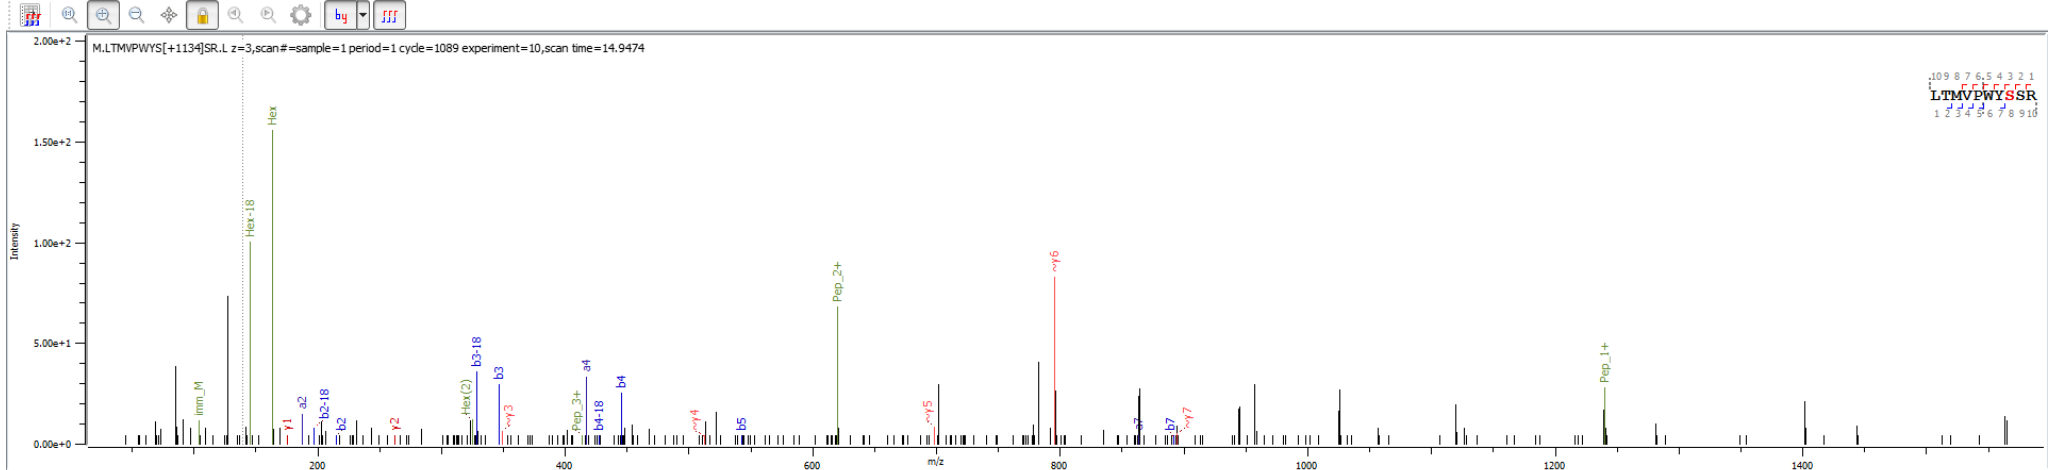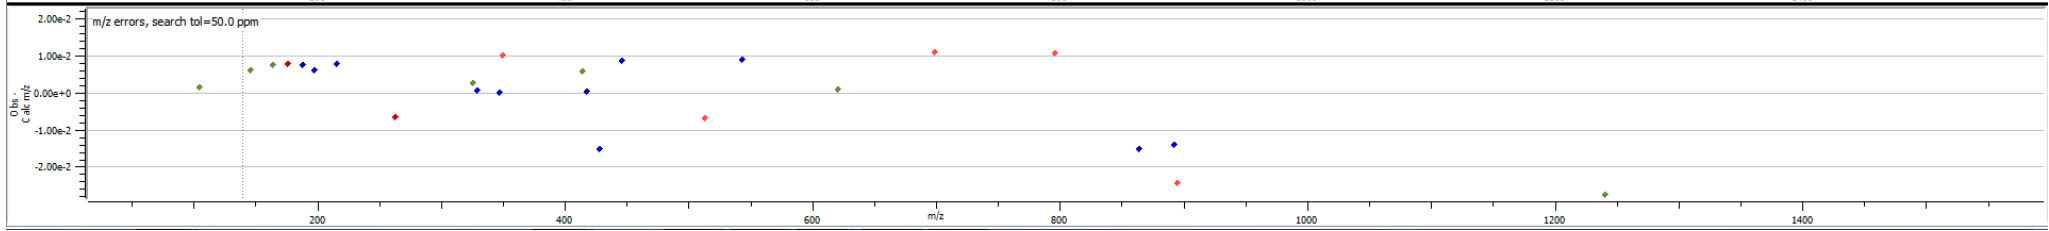

Sample S4 M.LTMVPWYS[+1134.370]SR.L

**Peptides** Print Download Filter Experiment=8

| PID | Prot. Rank | Pos. | Sequence | Mods (variable)             | Glycans                 | Score  | Delta Mo Score | z   | Obs. m/z | Calc. m/z | ppm err. | Off-By-X | Obs. MH   | Calc. MH  | Cleavage | Glycans Pos. | Protein Name                                                                       | Prot. Id | Scan Time |                  |
|-----|------------|------|----------|-----------------------------|-------------------------|--------|----------------|-----|----------|-----------|----------|----------|-----------|-----------|----------|--------------|------------------------------------------------------------------------------------|----------|-----------|------------------|
| 1   | 1416...    | 17   | 92       | M.LTMVPWYS[+1458.47541]SR.L | S8(Oglycan / 1458.4754) | Hex(9) | 548.1          | 1.2 | 3        | 900.0226  | 900.0363 | -15.26   | 2698.0533 | 2698.0945 | NRagged  | 8            | >sp P10863 TIR1_YEAST Cold shock-induced protein TIR1 OS=Saccharomyces cerevisi... | 4256     | 14.4545   | sample=1 period= |

**Proteins** Print Download Filter Text filter...

| Prot. Rank | Protein Name                                                                                            | [Log Prob] | Best [Log Prob] | Best Score | # Spectra | # Uniq. Peps. | # Mod Peps. | % Cov. | # AAs | Intensity |
|------------|---------------------------------------------------------------------------------------------------------|------------|-----------------|------------|-----------|---------------|-------------|--------|-------|-----------|
| 1          | >sp Q3E770 PAU9_YEAST Seripauperin-9 OS=Saccharomyces cerevisiae (strain ATCC 204508 / S288c) OX=559... | 288.60     | 16.66           | 988.6      | 452       | 61            | 56          | 60.8   | 120   | 1.023e+7  |
| 2          | >sp Q07987 PAU23_YEAST Seripauperin-23 OS=Saccharomyces cerevisiae (strain ATCC 204508 / S288c) OX=5... | 160.38     | 13.28           | 718.6      | 124       | 39            | 36          | 43.5   | 124   | 2.323e+6  |
| 3          | >sp P43575 PAU5_YEAST Seripauperin-5 OS=Saccharomyces cerevisiae (strain ATCC 204508 / S288c) OX=559... | 142.55     | 14.15           | 737.1      | 167       | 35            | 33          | 42.6   | 122   | 6.136e+6  |

Spectrum (double click to dock / undock)

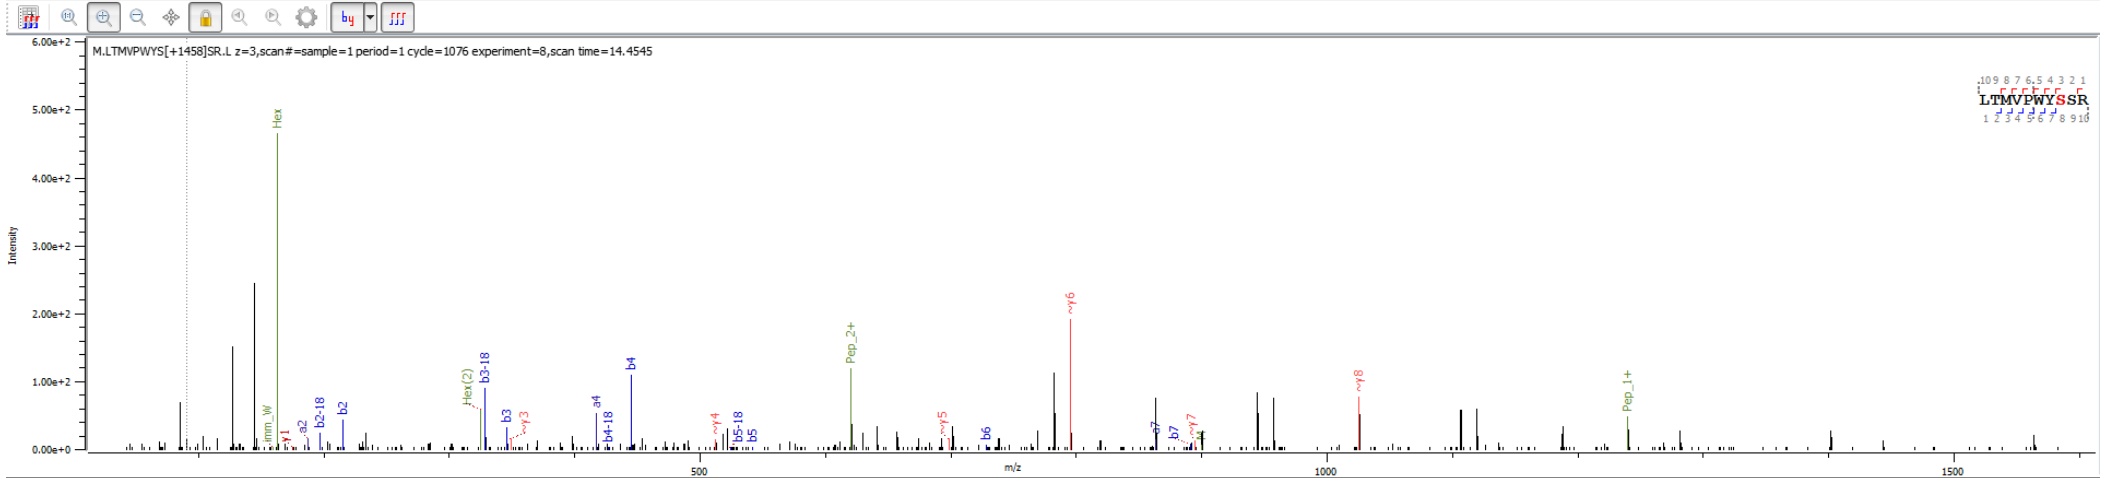

| PID        | Prot. Rank | Pos. | Sequence                  | Mods (variable)        | Glycans | Score | $\Delta$ Mo Score | z | Obs. m/z | Calc. m/z | ppm err. | Off-By-X | Obs. MH   | Calc. MH  | Cleavage  | Glycans Pos. | Protein Name                                                                      | Prot. Id | Scan Time |               |
|------------|------------|------|---------------------------|------------------------|---------|-------|-------------------|---|----------|-----------|----------|----------|-----------|-----------|-----------|--------------|-----------------------------------------------------------------------------------|----------|-----------|---------------|
| 1   262... | 3          | 105  | R.LRPAISS[+486.15847]AL.S | S7(OGlycan / 486.1585) | Hex(3)  | 481.0 | 17.7              | 2 | 707.3562 | 707.3640  | -10.92   |          | 1413.7052 | 1413.7206 | CRagged 7 |              | >sp P0CE85 PAU19_YEAST Seripauperin-19 OS=Saccharomyces cerevisiae (strain ATC... | 3420     | 12.7089   | sample=1 peri |

| Prot. Rank | Protein Name                                                                                            | [Log Prob] | Best [Log Prob] | Best Score | # Spectra | # Uniq. Peps. | # Mod Peps. | % Cov. | # AAs | Intensity |
|------------|---------------------------------------------------------------------------------------------------------|------------|-----------------|------------|-----------|---------------|-------------|--------|-------|-----------|
| 3   3      | >sp P0CE85 PAU19_YEAST Seripauperin-19 OS=Saccharomyces cerevisiae (strain ATCC 204508 / S288c) OX=5... | 123.82     | 11.06           | 692.3      | 77        | 31            | 30          | 42.7   | 124   | 2.619e+6  |
| 1   1   1  | >sp K0C1_HUMAN Common contaminant protein                                                               | 75.52      | 12.70           | 971.5      | 17        | 8             | 0           | 12.8   | 642   | 1.827e+5  |

Spectrum (double click to dock / undock)

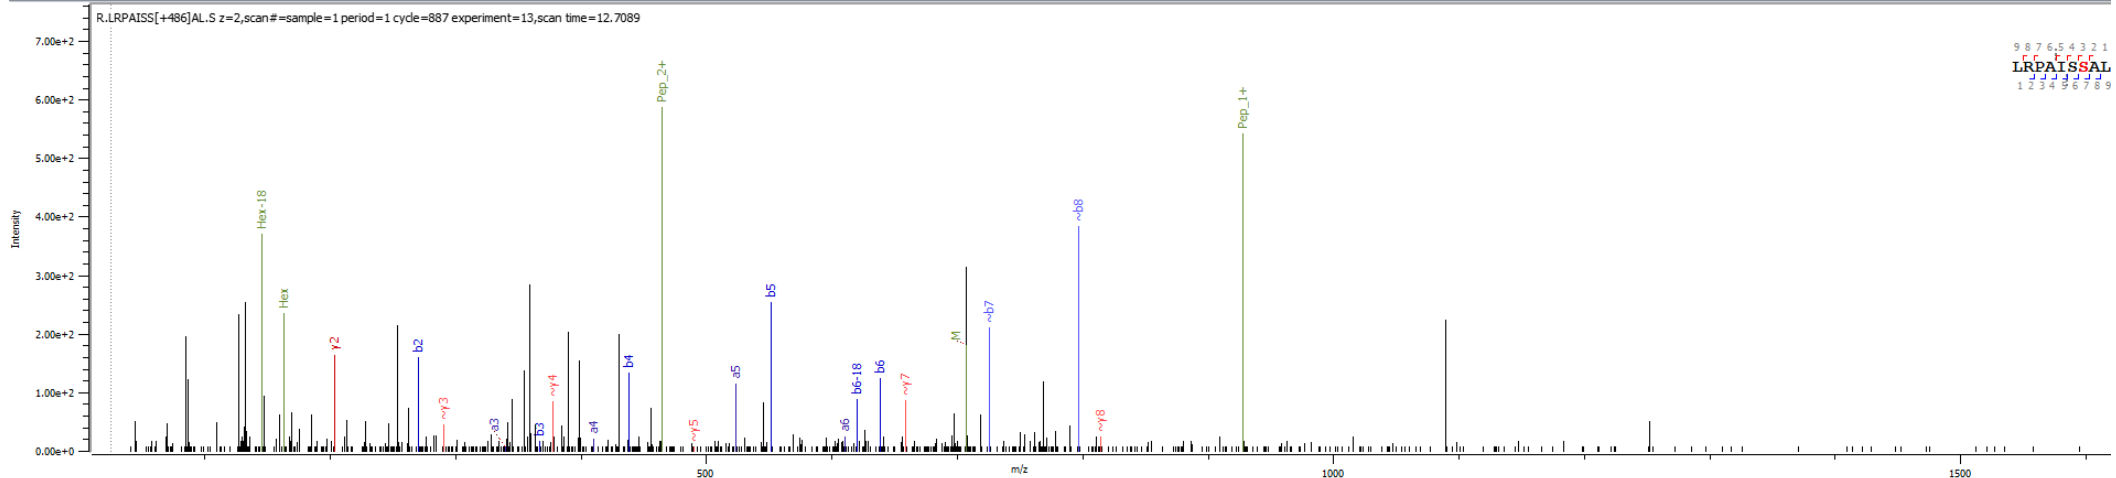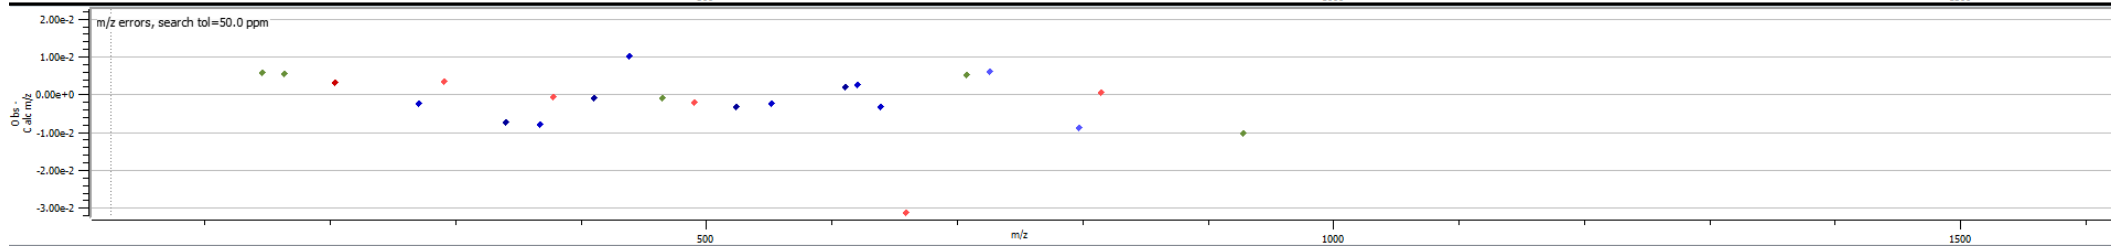

Sample S3 R.LRPAISS[+486.158]AL.S

| PID        | Prot. Rank | Pos. | Sequence                  | Mods (variable)        | Glycans | Score | delta Mo | z | Obs. m/z | Calc. m/z | ppm err. | Off-By-X | Obs. MH   | Calc. MH  | Cleavage | Glycans Pos. | Protein Name                                                                      | Prot. Id | Scan Time |
|------------|------------|------|---------------------------|------------------------|---------|-------|----------|---|----------|-----------|----------|----------|-----------|-----------|----------|--------------|-----------------------------------------------------------------------------------|----------|-----------|
| 1   218... | 2          | 105  | R.LRPAIS[+648.21129]SAL.S | S6(OGlycan / 648.2113) | Hex(4)  | 412.1 | 1.4      | 2 | 788.3810 | 788.3904  | -11.86   |          | 1575.7548 | 1575.7735 | Cragged  | 6            | >sp Q07987 PAU23_YEAST Seripauperin-23 OS=Saccharomyces cerevisiae (strain ATC... | 3438     | 12.6460   |

| Prot. Rank | Protein Name                                                                                            | [Log Prob] | Best [Log Prob] | Best Score | # Spectra | # Uniq. Peps. | # Mod Peps. | % Cov. | # AAs | Intensity |
|------------|---------------------------------------------------------------------------------------------------------|------------|-----------------|------------|-----------|---------------|-------------|--------|-------|-----------|
| 1   1      | >sp Q3E770 PAU9_YEAST Seripauperin-9 OS=Saccharomyces cerevisiae (strain ATCC 204508 / S288c) OX=559... | 288.60     | 16.66           | 988.6      | 452       | 61            | 56          | 60.8   | 120   | 1.023e+7  |
| 2   2      | >sp Q07987 PAU23_YEAST Seripauperin-23 OS=Saccharomyces cerevisiae (strain ATCC 204508 / S288c) OX=5... | 160.38     | 13.28           | 718.6      | 124       | 39            | 36          | 43.5   | 124   | 2.323e+6  |
| 3   3      | >sp P43575 PAU5_YEAST Seripauperin-5 OS=Saccharomyces cerevisiae (strain ATCC 204508 / S288c) OX=559... | 142.55     | 14.15           | 737.1      | 167       | 35            | 33          | 42.6   | 122   | 6.136e+6  |

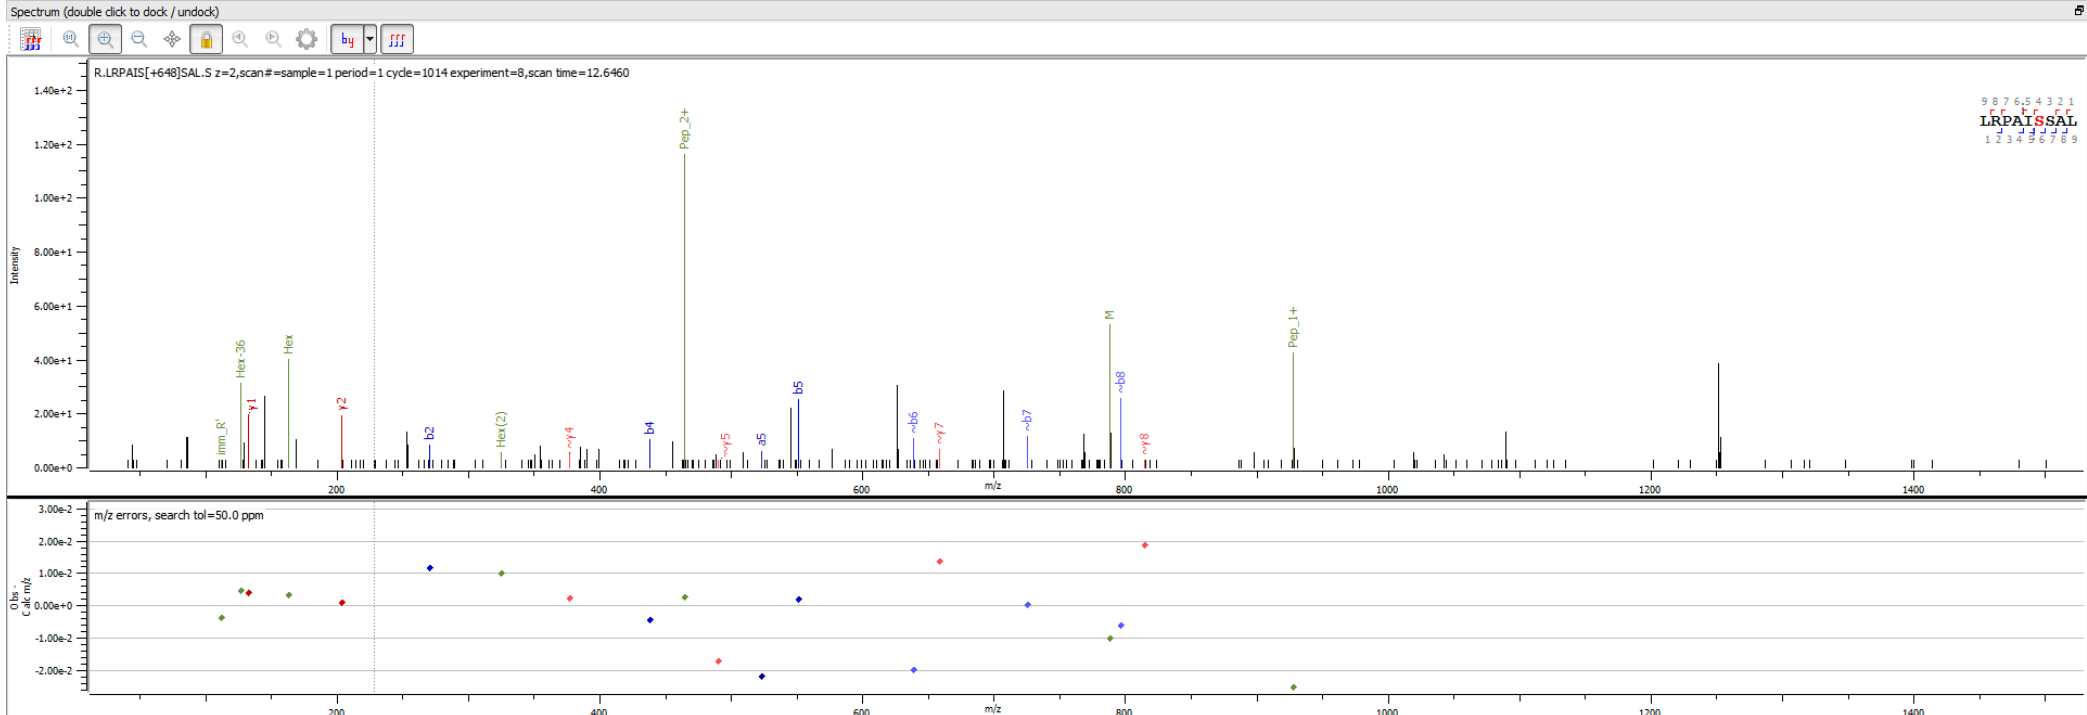

Sample S6 R.LRPAIS[+648.211]SAL.S

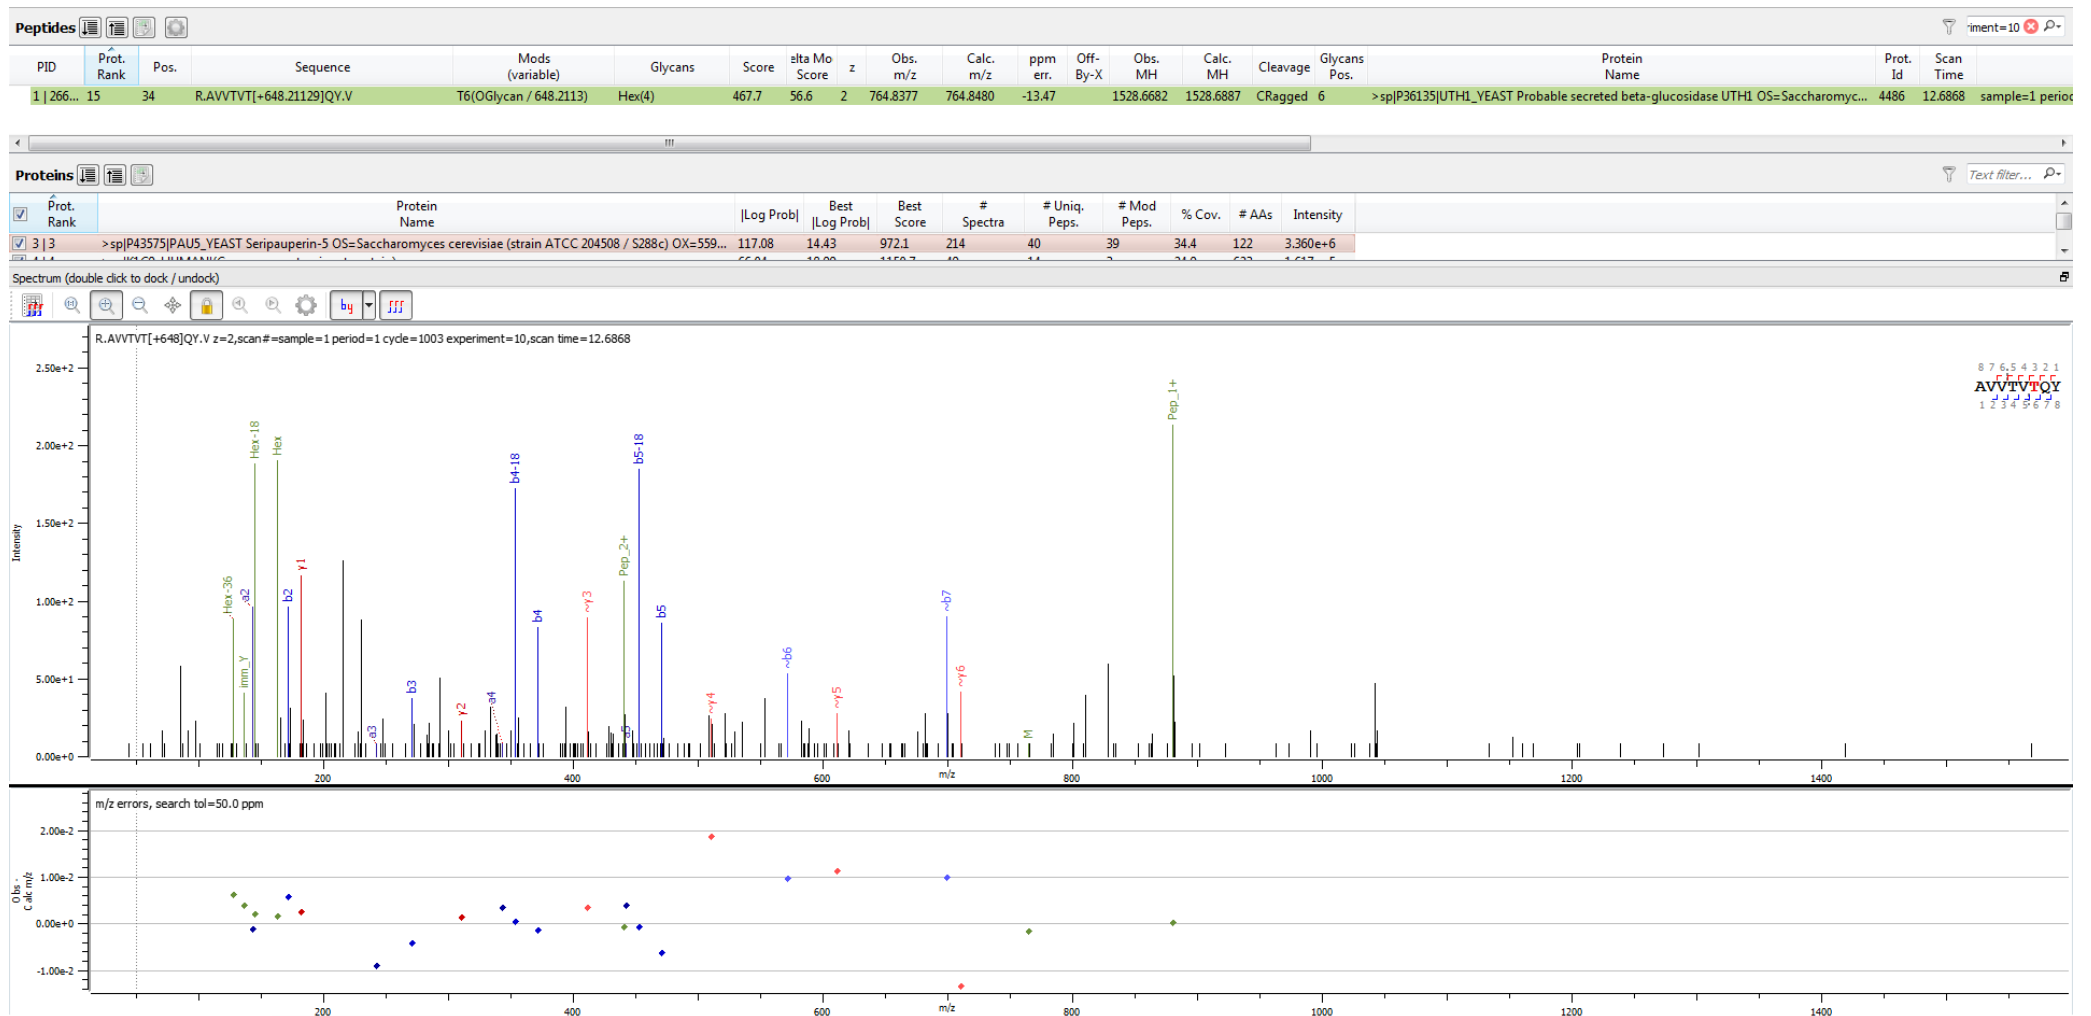

Sample S2 R.AVVTVT[+648.211]QY.V

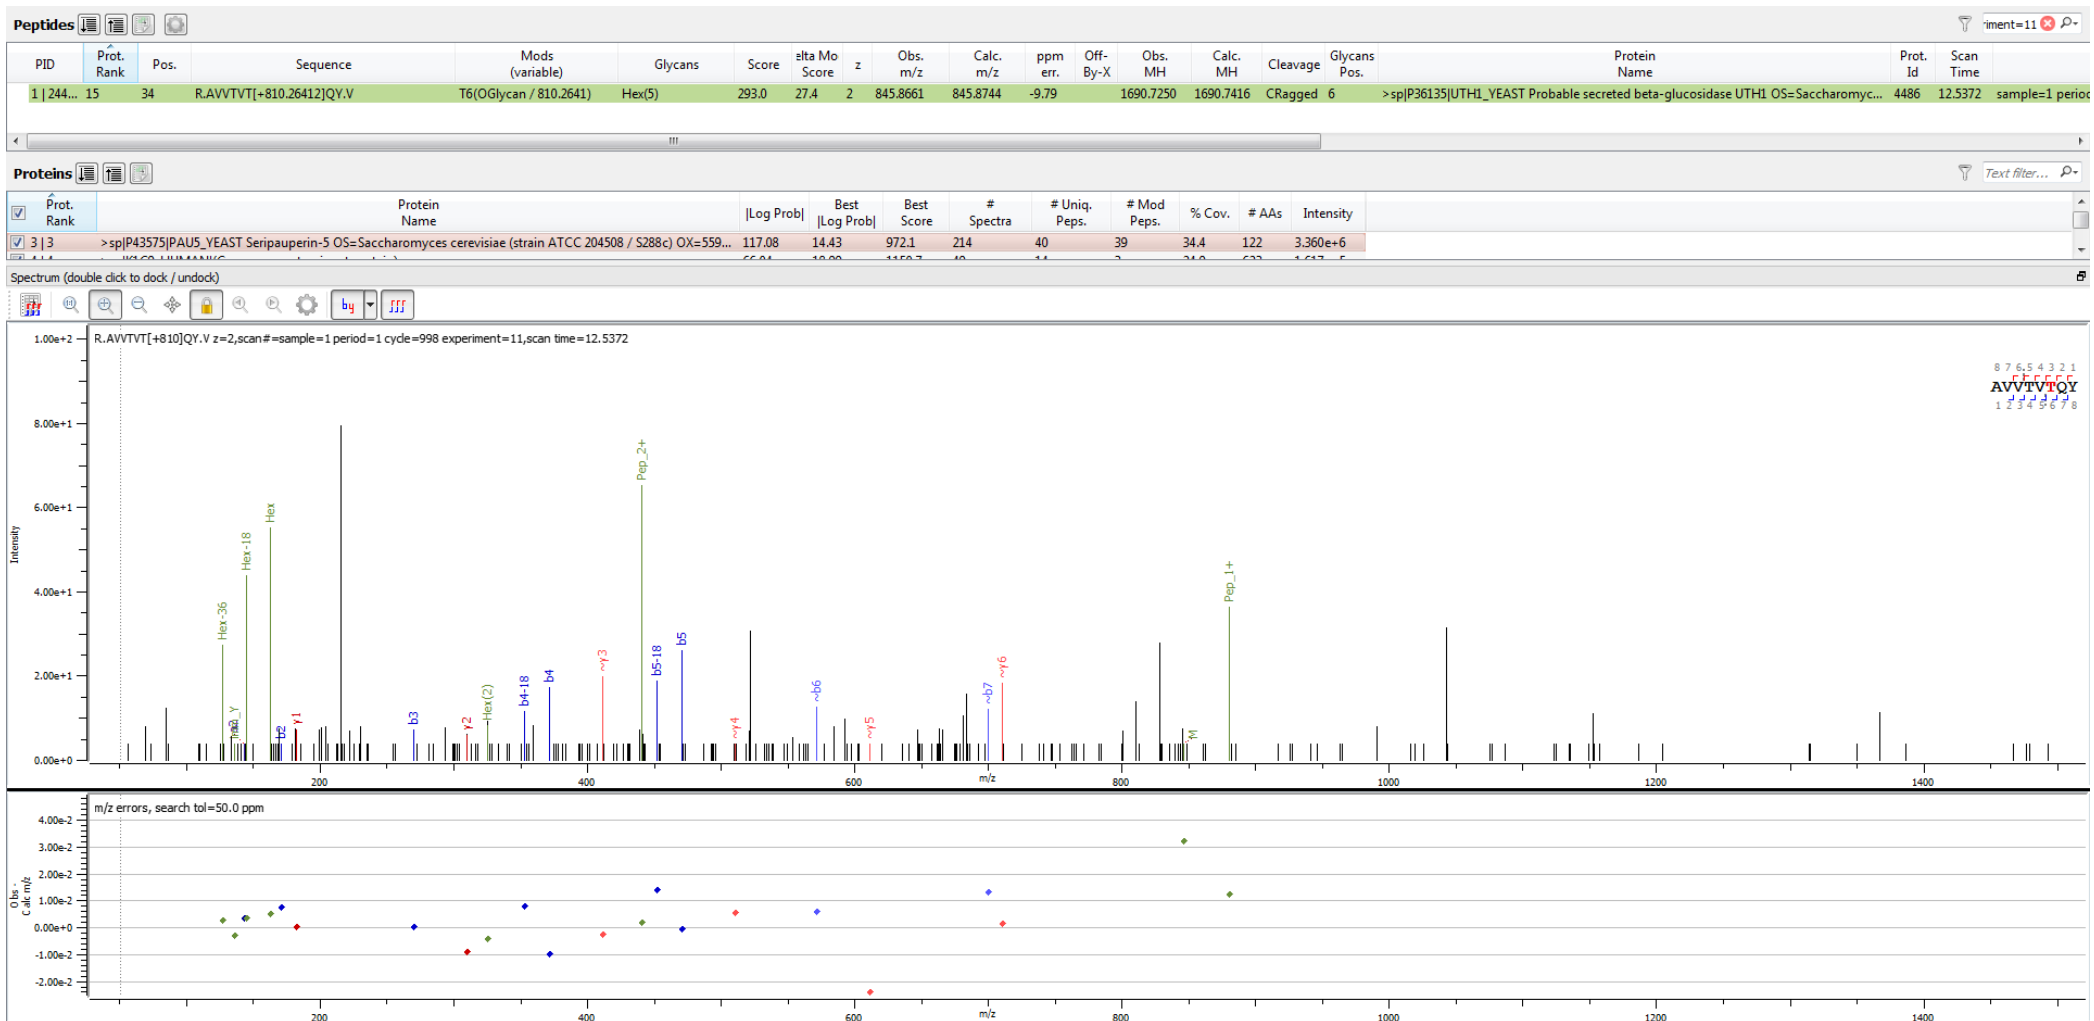

Sample S2 R.AVVTVT[+810.264]QY.V

| PID | Prot. Rank | Pos. | Sequence | Mods (variable)         | Glycans                | Score  | delta Mo Score | z    | Obs. m/z | Calc. m/z | ppm err. | Off-By-X | Obs. MH   | Calc. MH  | Cleavage | Glycans Pos. | Protein Name                                                                       | Prot. Id | Scan Time |                 |
|-----|------------|------|----------|-------------------------|------------------------|--------|----------------|------|----------|-----------|----------|----------|-----------|-----------|----------|--------------|------------------------------------------------------------------------------------|----------|-----------|-----------------|
| 1   | 425...     | 19   | 93       | K.LPWYT[+486.15847]TR.L | T5(Oglycan / 486.1585) | Hex(3) | 460.4          | 24.3 | 2        | 711.8204  | 711.8298 | -13.10   | 1422.6336 | 1422.6522 | Specific | 5            | >sp P27654 TIPI1_YEAST Temperature shock-inducible protein 1 OS=Saccharomyces c... | 4237     | 13.5003   | sample=1 period |

| Prot. Rank | Protein Name                                                                                            | [Log Prob] | Best [Log Prob] | Best Score | # Spectra | # Uniq. Peps. | # Mod. Peps. | % Cov. | # AAs | Intensity |
|------------|---------------------------------------------------------------------------------------------------------|------------|-----------------|------------|-----------|---------------|--------------|--------|-------|-----------|
| 1          | >sp P43575 PAU5_YEAST Seripauperin-5 OS=Saccharomyces cerevisiae (strain ATCC 204508 / S288c) OX=559... | 327.47     | 16.74           | 1004.1     | 632       | 70            | 67           | 68.9   | 122   | 3.742e+7  |

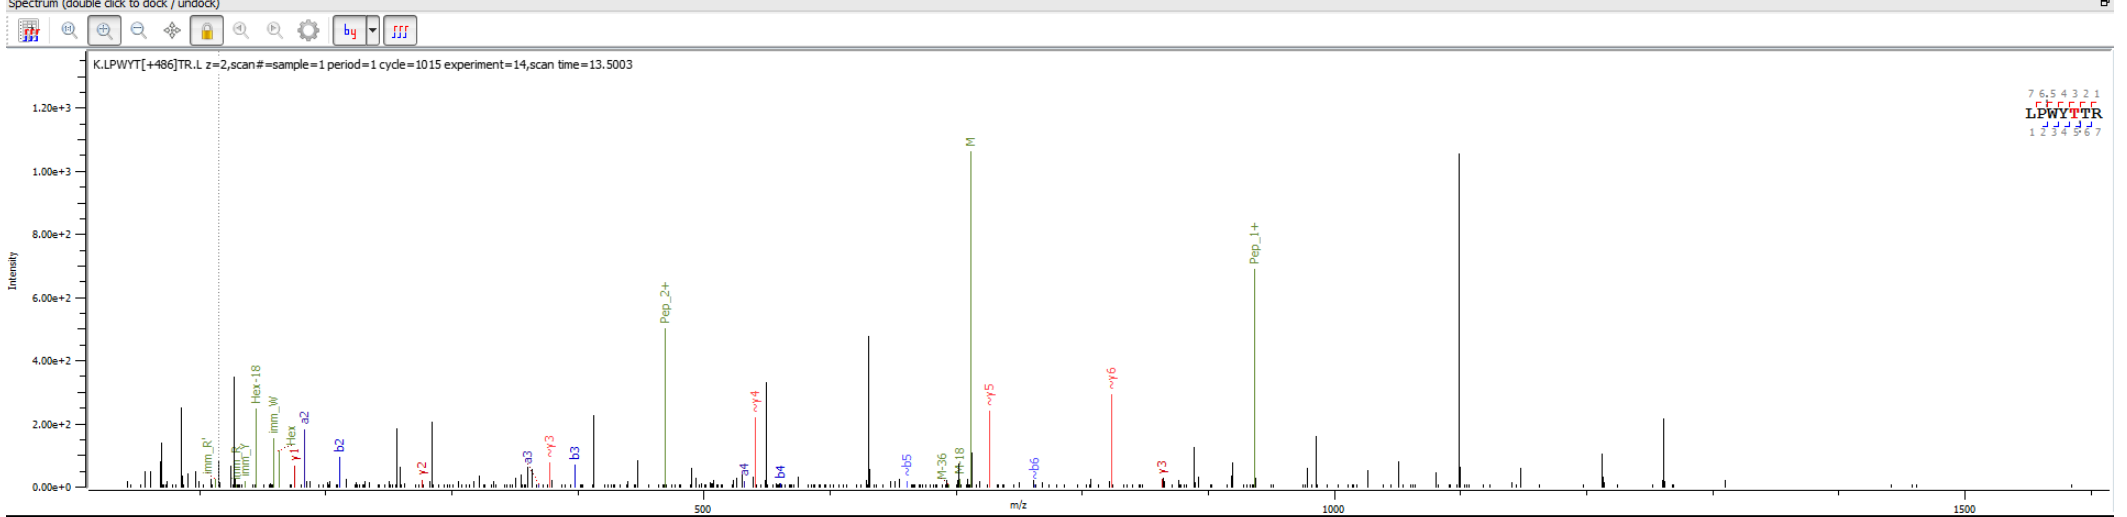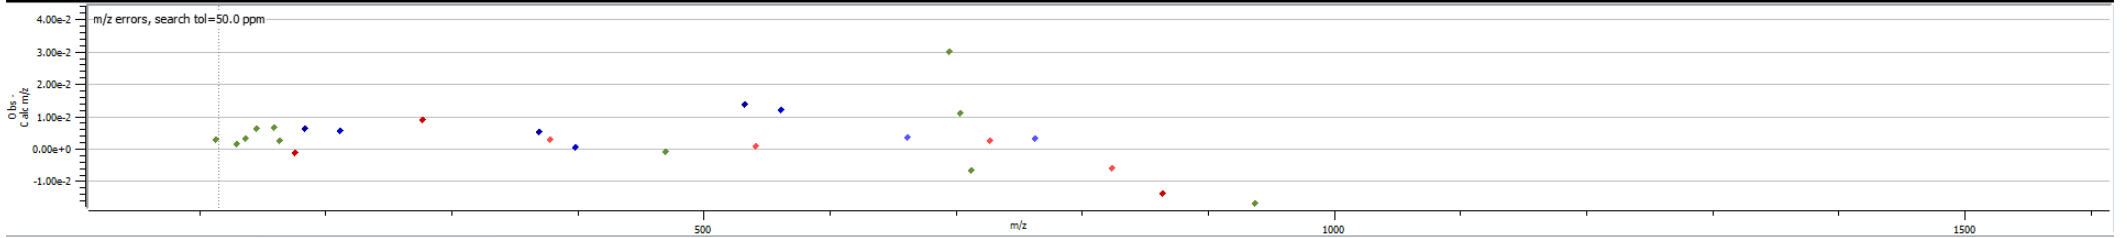

Sample S1 K.LPWYT[+486.158]TR.L



Peptides

| PID        | Prot. Rank | Pos. | Sequence                | Mods (variable)        | Glycans | Score | Delta Mo Score | z | Obs. m/z | Calc. m/z | ppm err. | Off-By-X | Obs. MH   | Calc. MH  | Cleavage | Glycans Pos. | Protein Name                                                                      | Prot. Id | Scan Time                 |
|------------|------------|------|-------------------------|------------------------|---------|-------|----------------|---|----------|-----------|----------|----------|-----------|-----------|----------|--------------|-----------------------------------------------------------------------------------|----------|---------------------------|
| 1   316... | 22         | 93   | K.LPWYT[+648.21129]TR.L | T5(OGlycan / 648.2113) | Hex(4)  | 408.8 | 1.0            | 2 | 792.8440 | 792.8562  | -15.32   |          | 1584.6808 | 1584.7051 | Specific | 5            | >sp P27654 TIP1_YEAST Temperature shock-inducible protein 1 OS=Saccharomyces c... | 4237     | 13.4180 sample=1 period=1 |

Proteins

| Prot. Rank | Protein Name                                                                                            | [Log Prob] | Best [Log Prob] | Best Score | # Spectra | # Uniq. Peps. | # Mod Peps. | % Cov. | # AAs | Intensity |
|------------|---------------------------------------------------------------------------------------------------------|------------|-----------------|------------|-----------|---------------|-------------|--------|-------|-----------|
| 1   1      | >sp Q3E770 PAU9_YEAST Seripauperin-9 OS=Saccharomyces cerevisiae (strain ATCC 204508 / S288c) OX=559... | 288.60     | 16.66           | 988.6      | 452       | 61            | 56          | 60.8   | 120   | 1.023e+7  |
| 2   2      | >sp Q07987 PAU23_YEAST Seripauperin-23 OS=Saccharomyces cerevisiae (strain ATCC 204508 / S288c) OX=5... | 160.38     | 13.28           | 718.6      | 124       | 39            | 36          | 43.5   | 124   | 2.323e+6  |
| 3   3      | >sp P43575 PAU5_YEAST Seripauperin-5 OS=Saccharomyces cerevisiae (strain ATCC 204508 / S288c) OX=559... | 142.55     | 14.15           | 737.1      | 167       | 35            | 33          | 42.6   | 122   | 6.136e+6  |

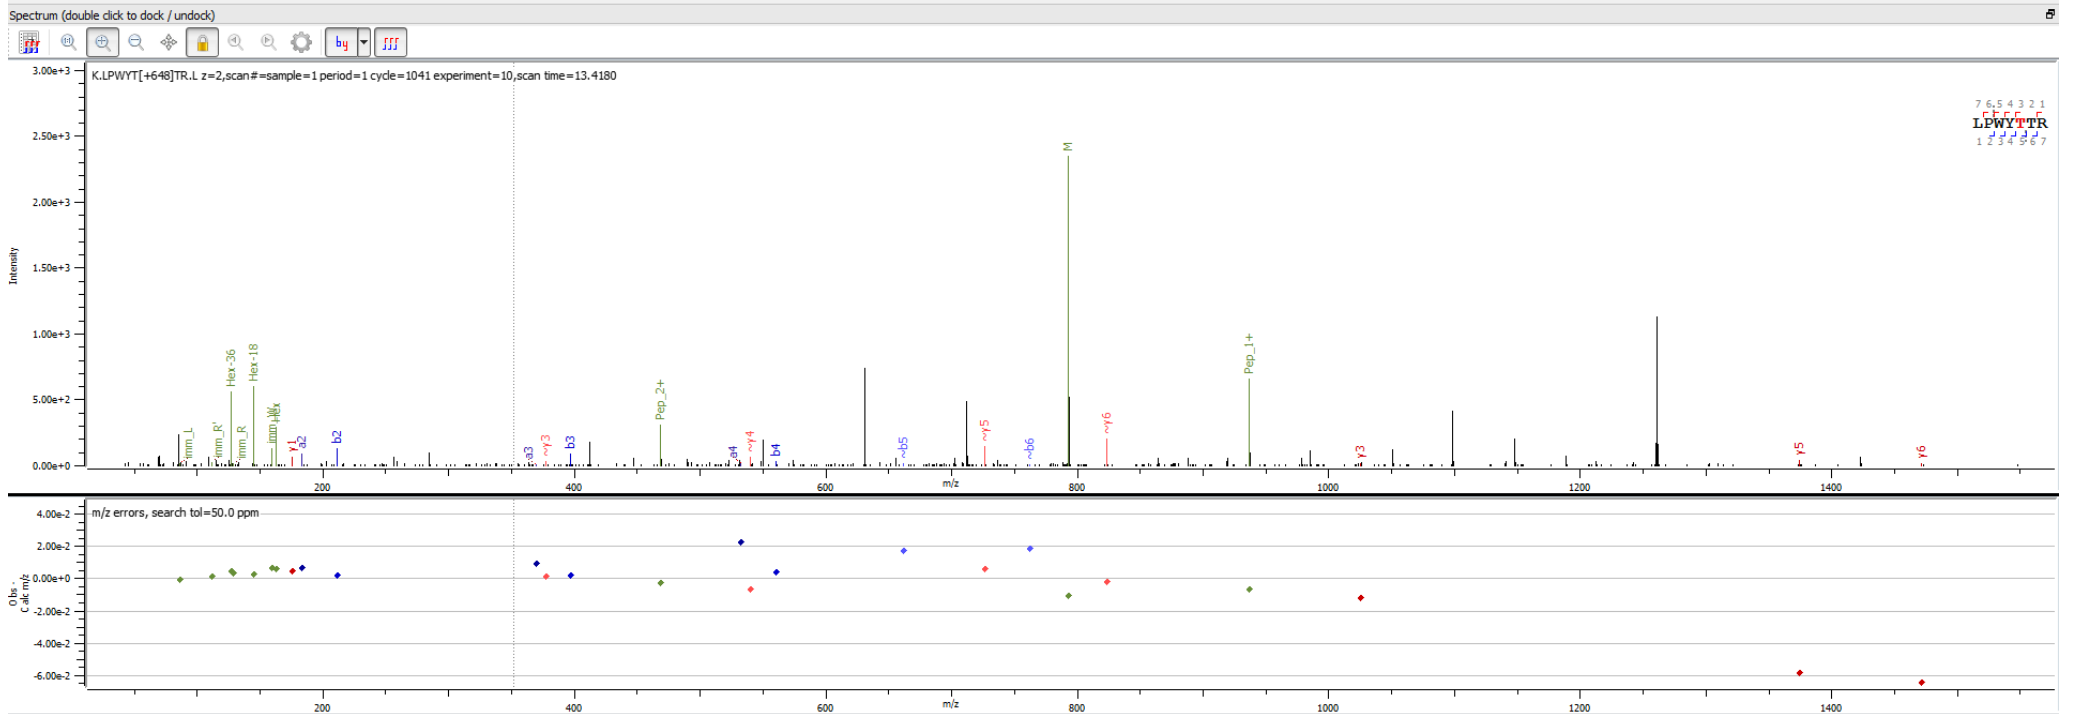

Sample S6 K.LPWYT[+648.211]TR.L

| PID | Prot. Rank | Pos. | Sequence | Mods (variable)                | Glycans                 | Score  | delta Mo Score | z     | Obs. m/z | Calc. m/z | ppm err. | Off-By-X | Obs. MH   | Calc. MH  | Cleavage | Glycans Pos. | Protein Name                                                                         | Prot. Id | Scan Time |                     |
|-----|------------|------|----------|--------------------------------|-------------------------|--------|----------------|-------|----------|-----------|----------|----------|-----------|-----------|----------|--------------|--------------------------------------------------------------------------------------|----------|-----------|---------------------|
| 1   | 109...     | 21   | 33       | R.VNLIELAVYVS[+324.10565]DIR.A | S11(OGlycan / 324.1056) | Hex(2) | 552.7          | 316.1 | 2        | 964.4951  | 964.5091 | -14.52   | 1927.9830 | 1928.0110 | Specific | 11           | >sp P47179 DAN4_YEAST Cell wall protein DAN4 OS=Saccharomyces cerevisiae (strain ... | 273      | 19.6318   | sample=1 period=... |

| Prot. Rank | Protein Name                                                                                            | [Log Prob] | Best [Log Prob] | Best Score | # Spectra | # Uniq. Peps. | # Mod Peps. | % Cov. | # AAs | Intensity |
|------------|---------------------------------------------------------------------------------------------------------|------------|-----------------|------------|-----------|---------------|-------------|--------|-------|-----------|
| 1          | >sp Q3E770 PAU9_YEAST Seripauperin-9 OS=Saccharomyces cerevisiae (strain ATCC 204508 / S288c) OX=559... | 288.60     | 16.66           | 988.6      | 452       | 61            | 56          | 60.8   | 120   | 1.023e+7  |
| 2          | >sp Q07987 PAU23_YEAST Seripauperin-23 OS=Saccharomyces cerevisiae (strain ATCC 204508 / S288c) OX=5... | 160.38     | 13.28           | 718.6      | 124       | 39            | 36          | 43.5   | 124   | 2.323e+6  |
| 3          | >sp P43575 PAU5_YEAST Seripauperin-5 OS=Saccharomyces cerevisiae (strain ATCC 204508 / S288c) OX=559... | 142.55     | 14.15           | 737.1      | 167       | 35            | 33          | 42.6   | 122   | 6.136e+6  |

Spectrum (double click to dock / undock)

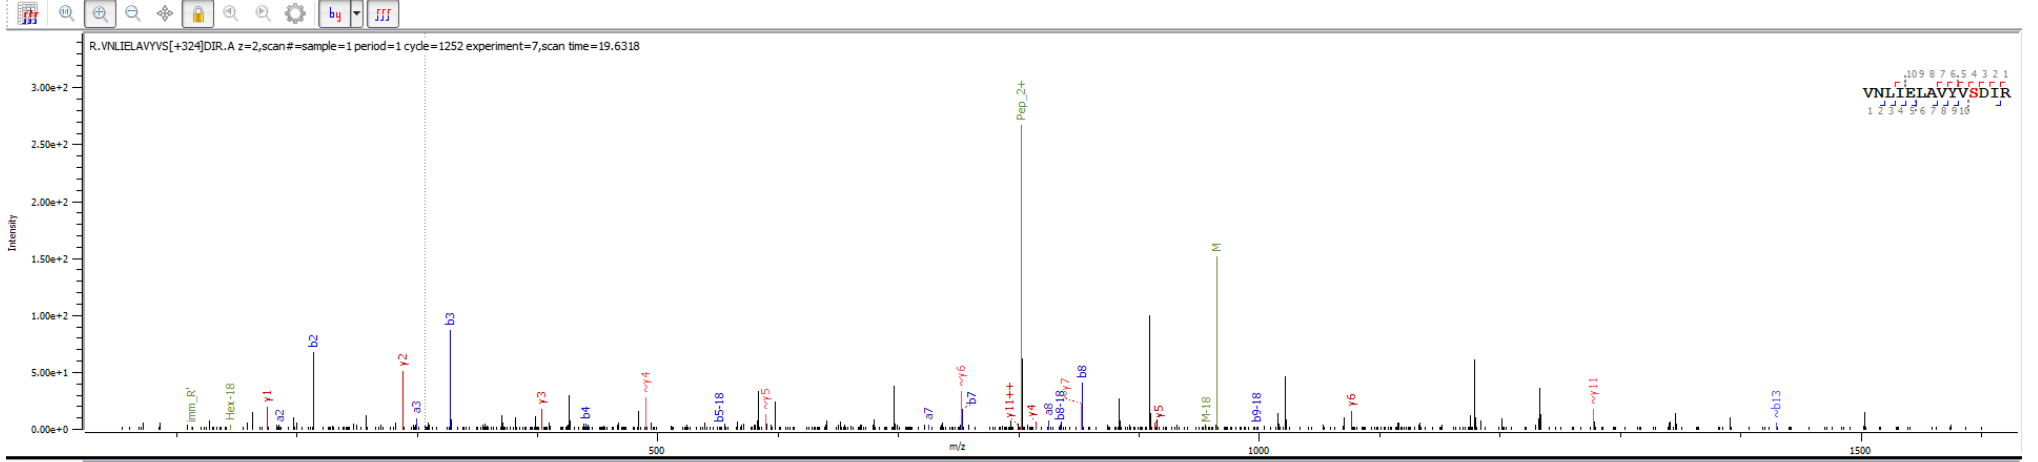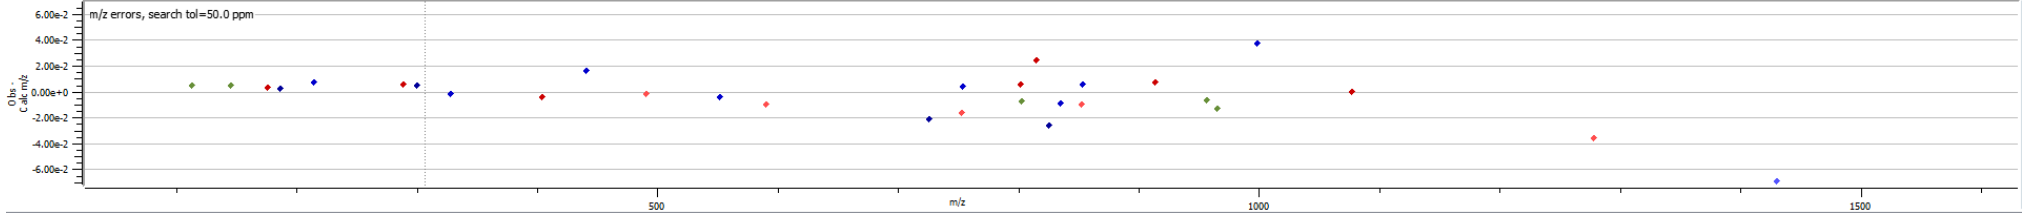

Sample S6 R.VNLIELAVYVS[+324.106]DIR.A

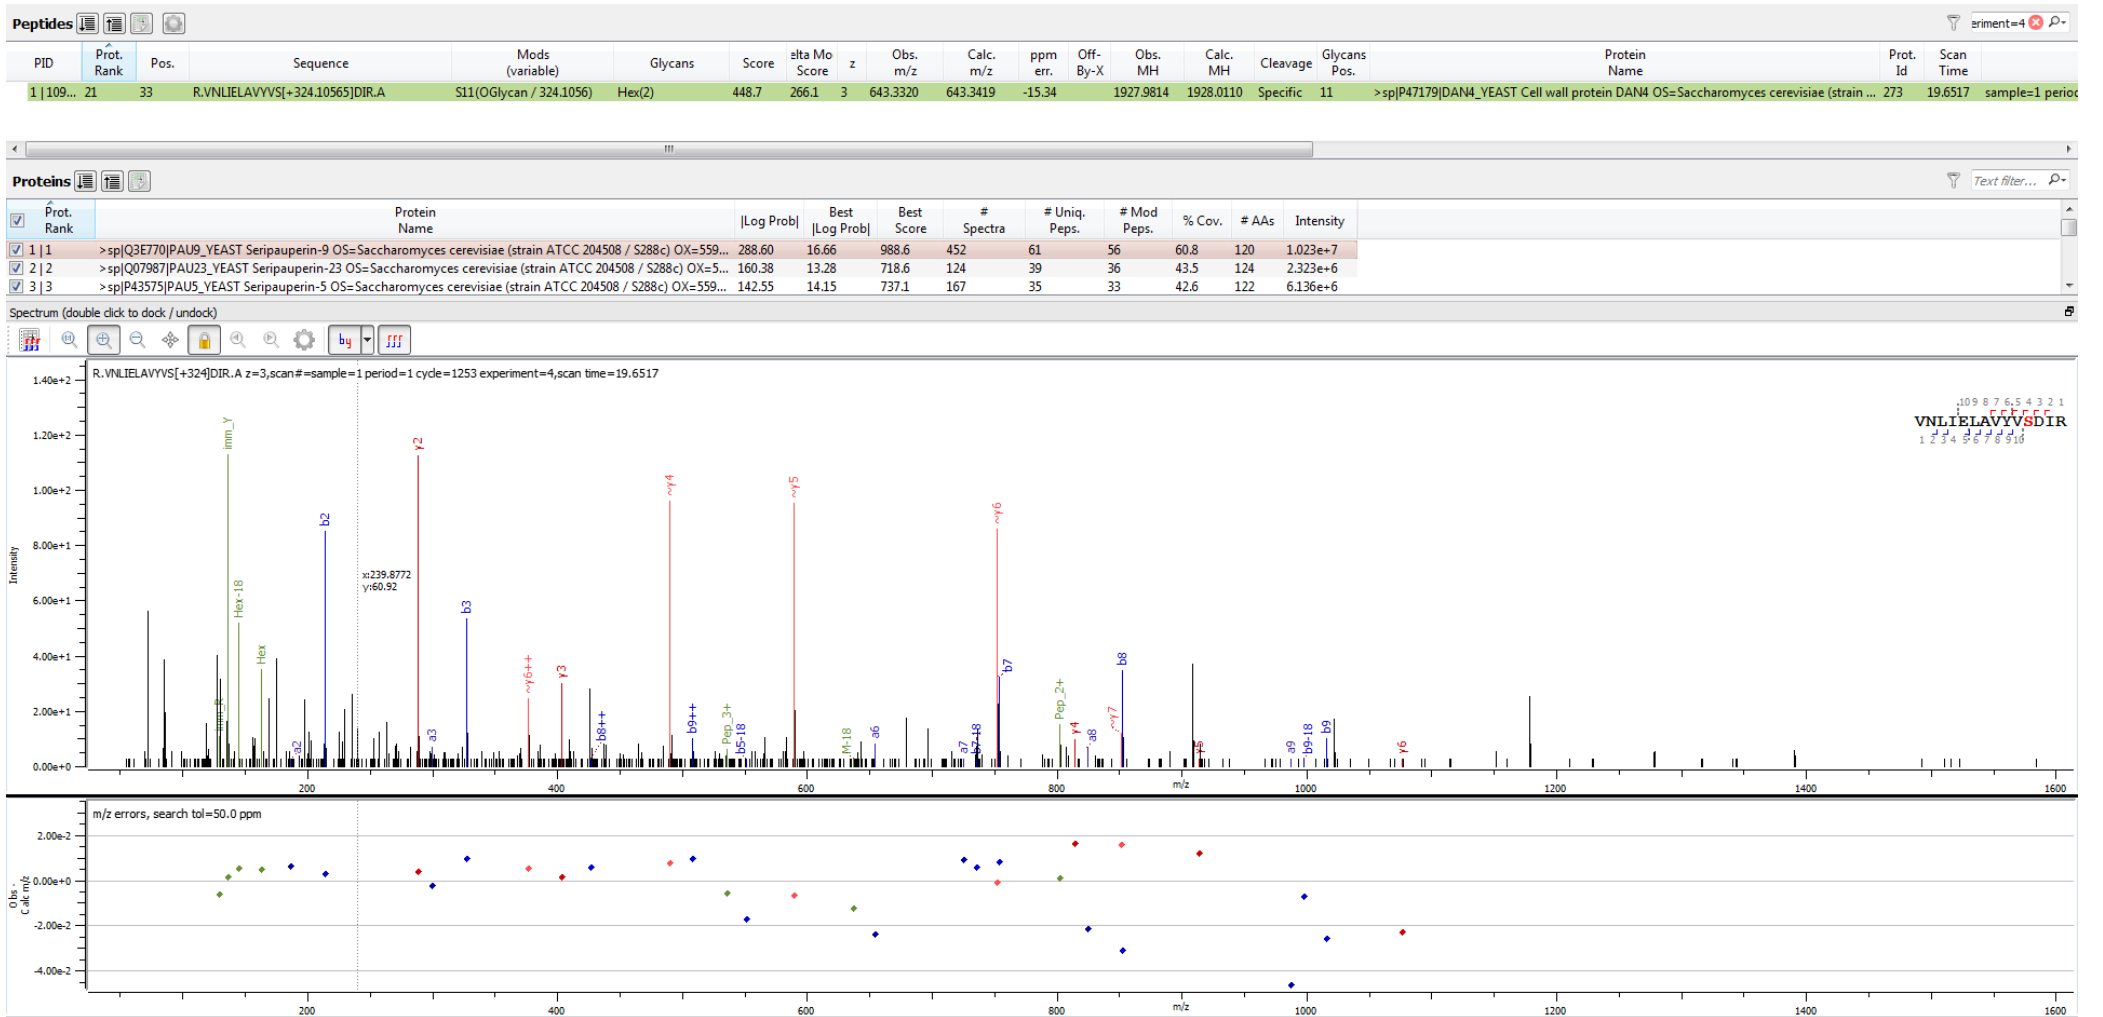

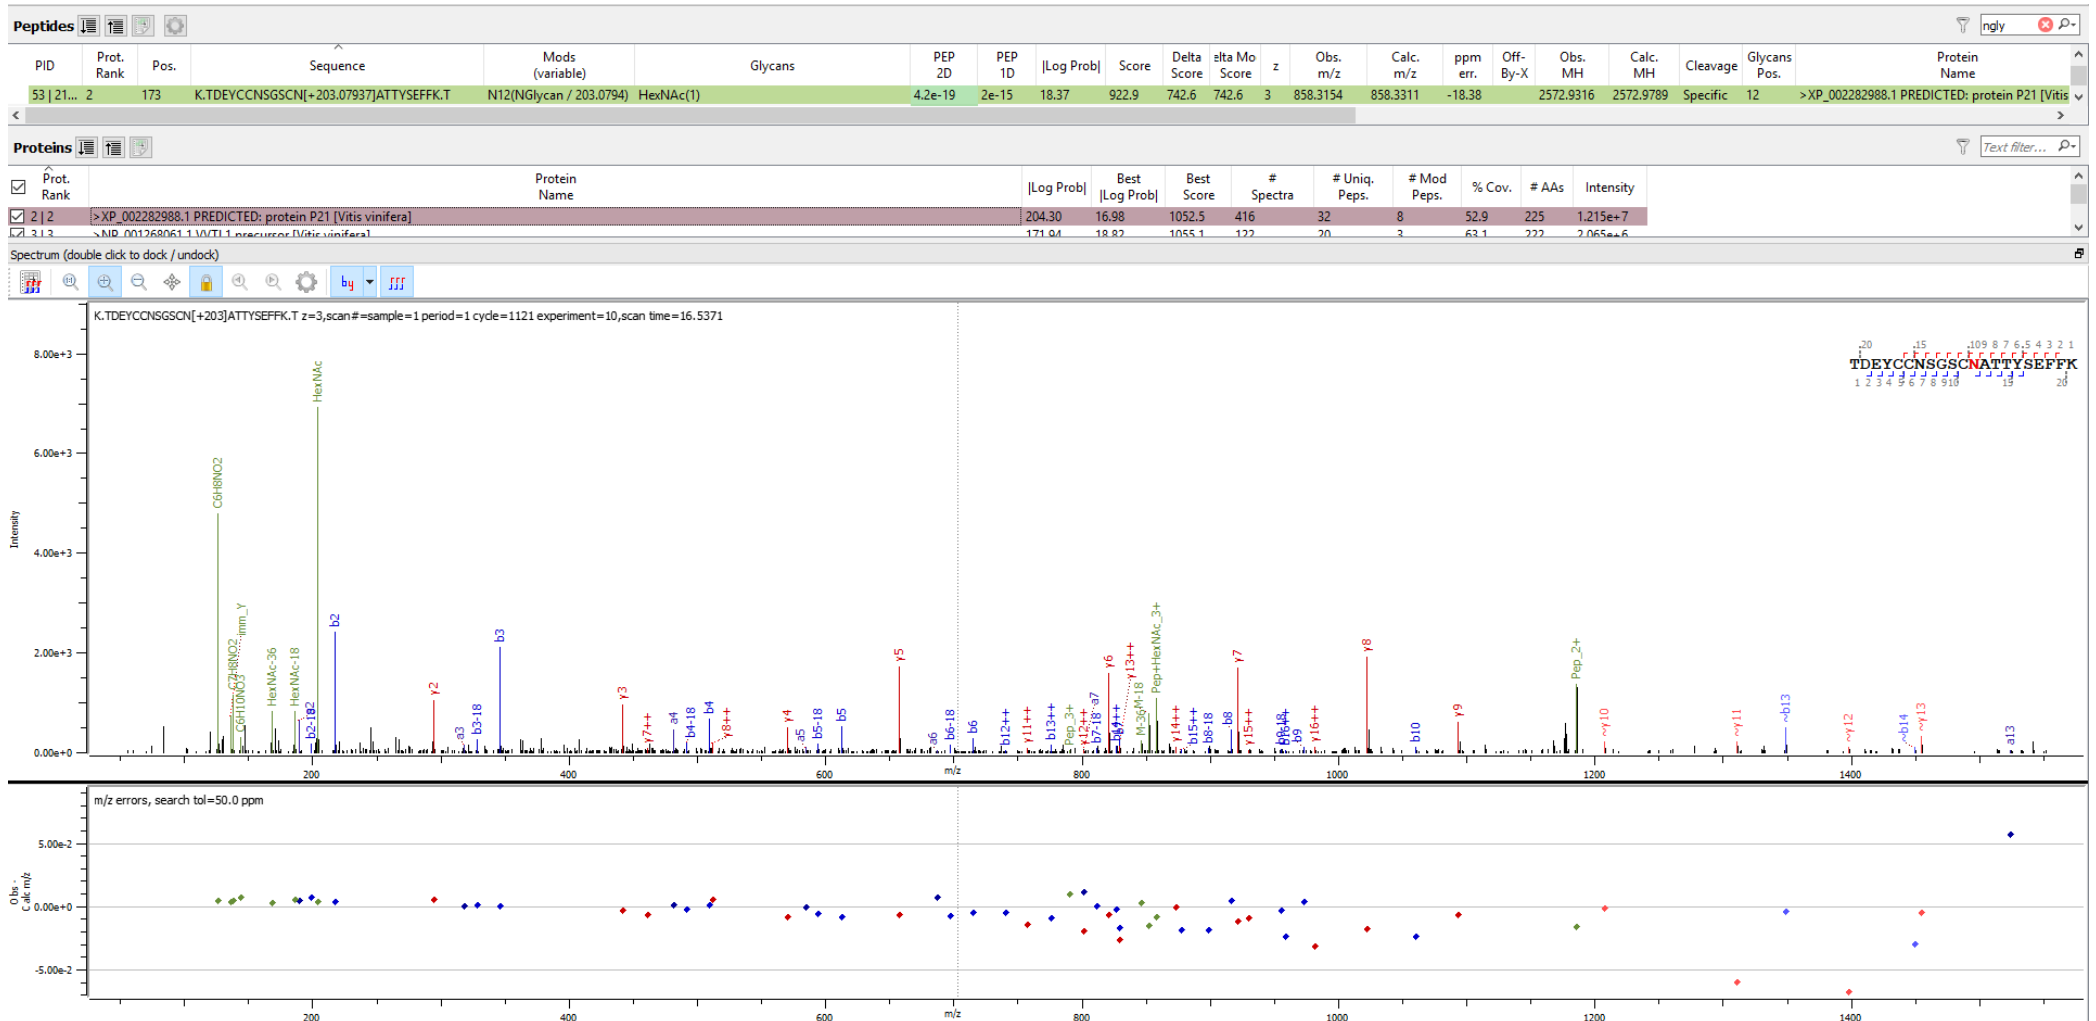

Sample S1 K.TDEYCCNSGSCN[+203.079]ATTYSEFFK.T

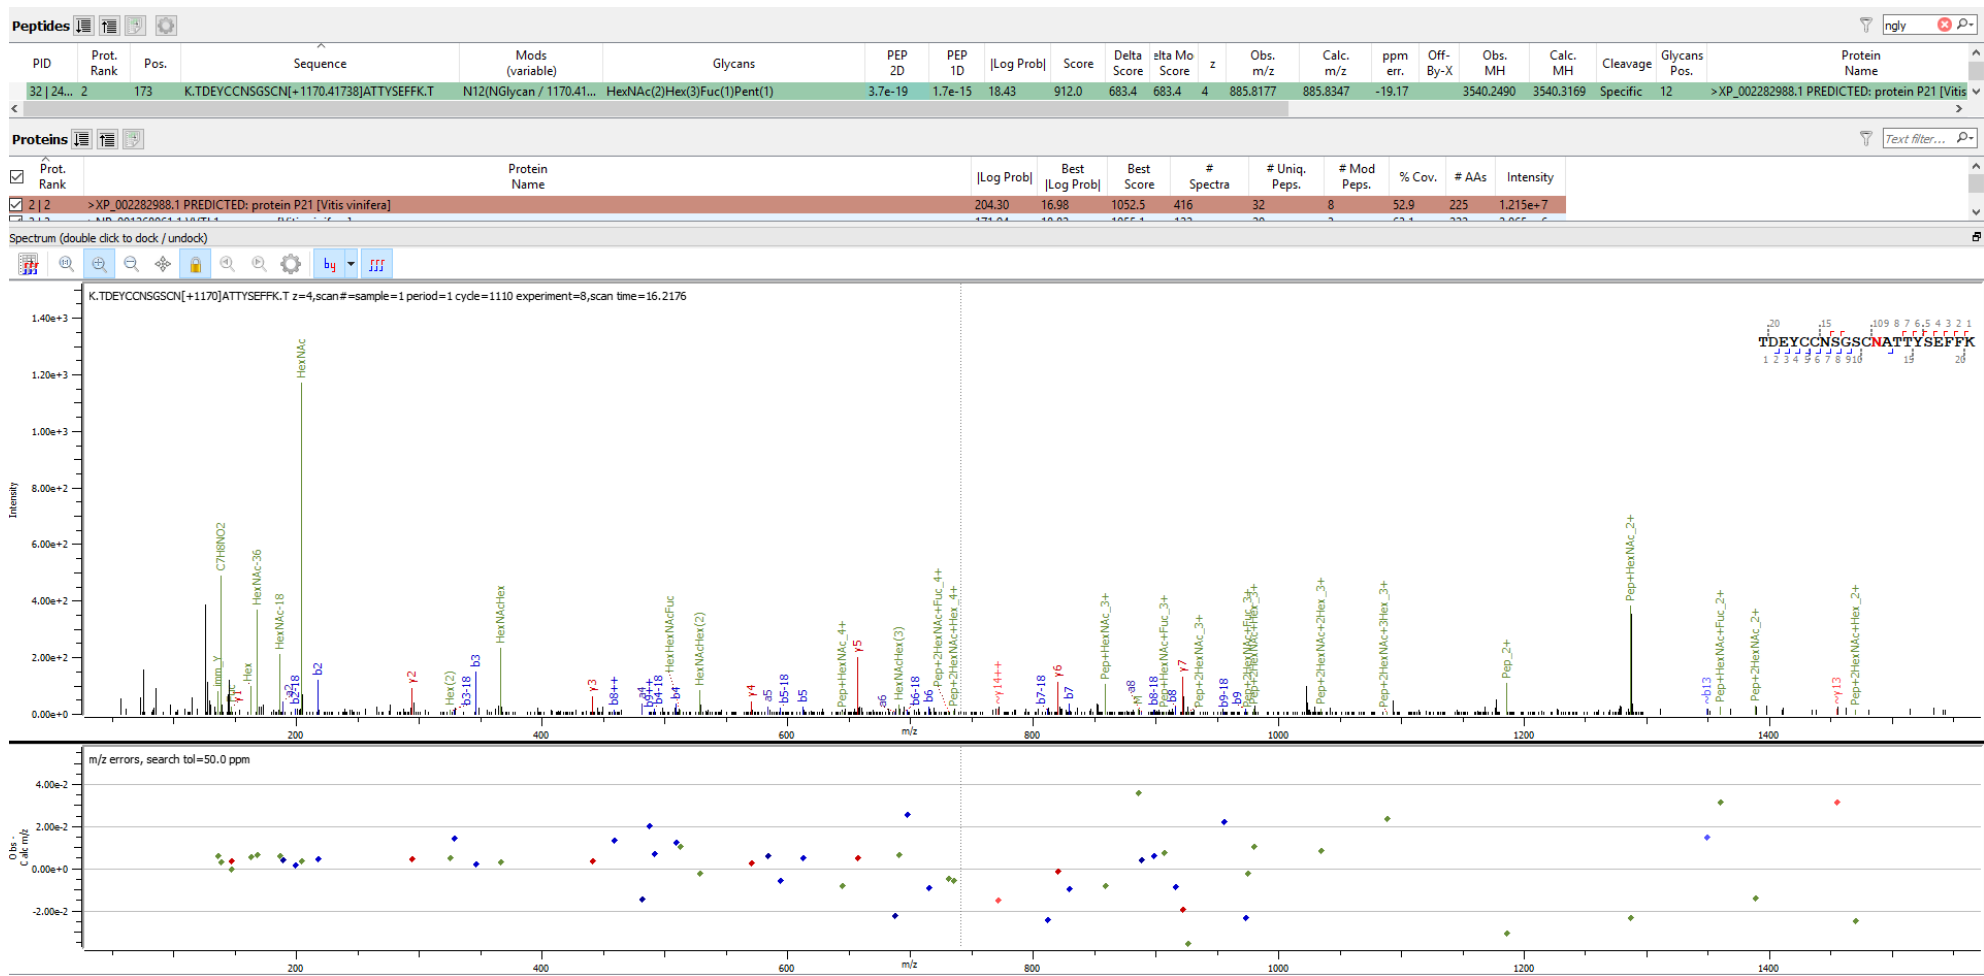

Sample S1 K.TDEYCCNSGSCN[+1170.417]ATTYSEFFK.T

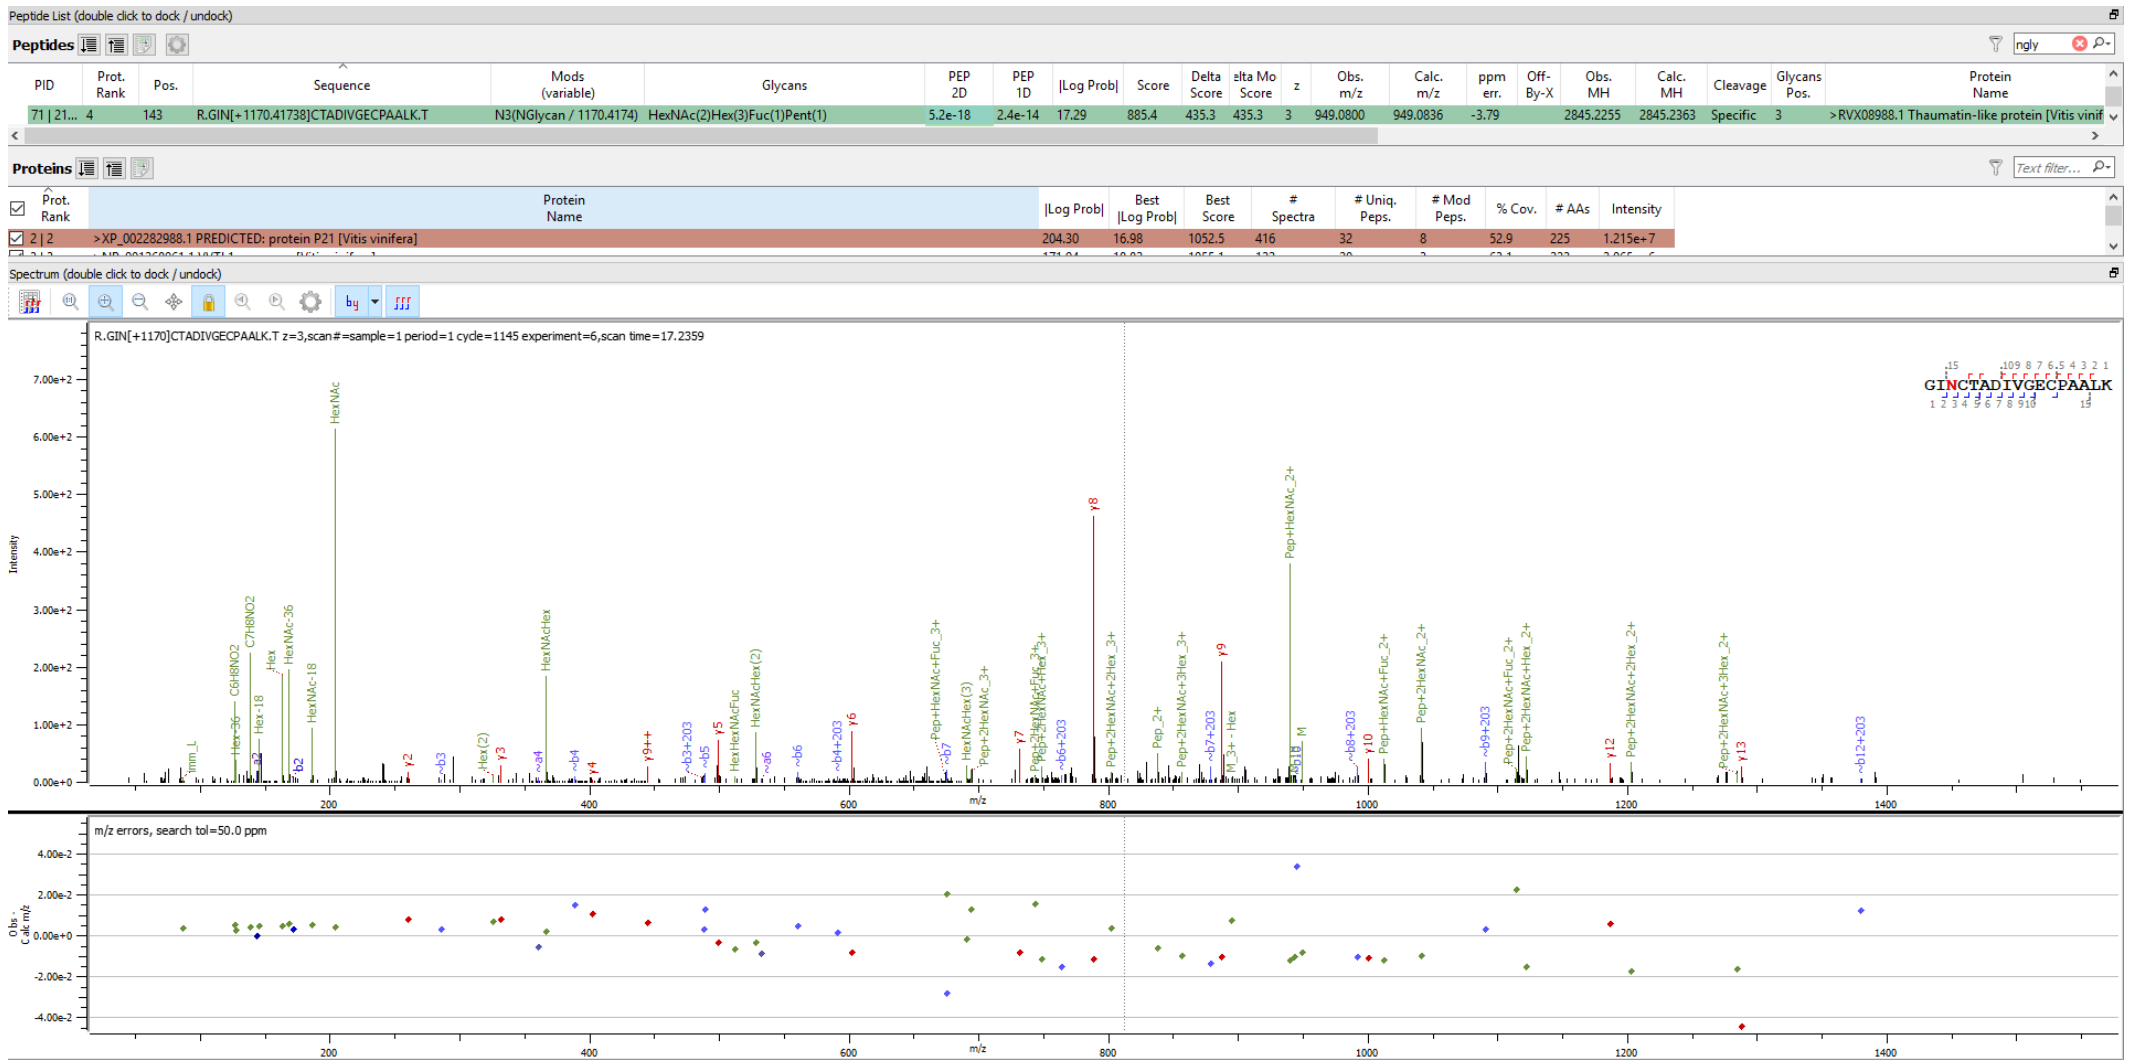

Sample S1 R.GIN[+1170.417]CTADIVGECPAALK.T

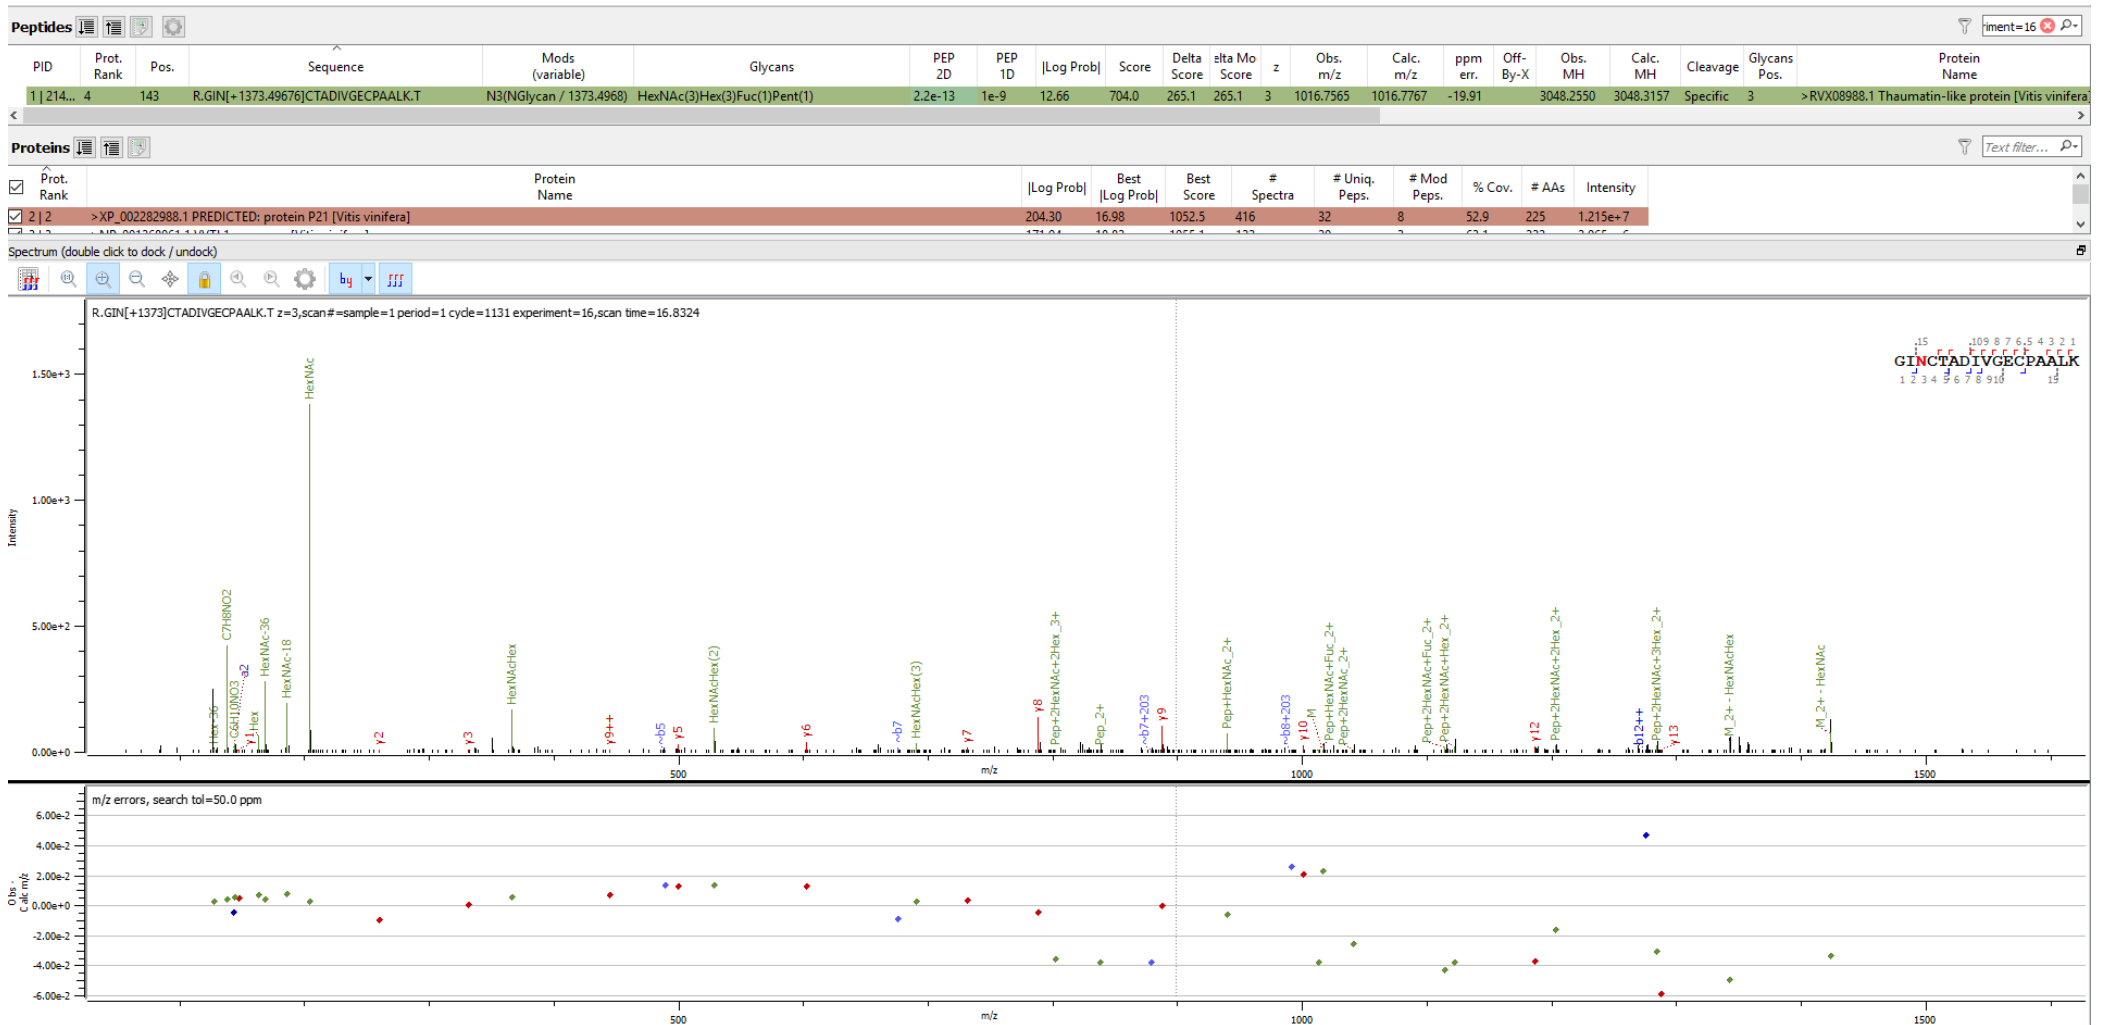

Sample S1 R.GIN[+1373.497]CTADIVGECPAALK.T

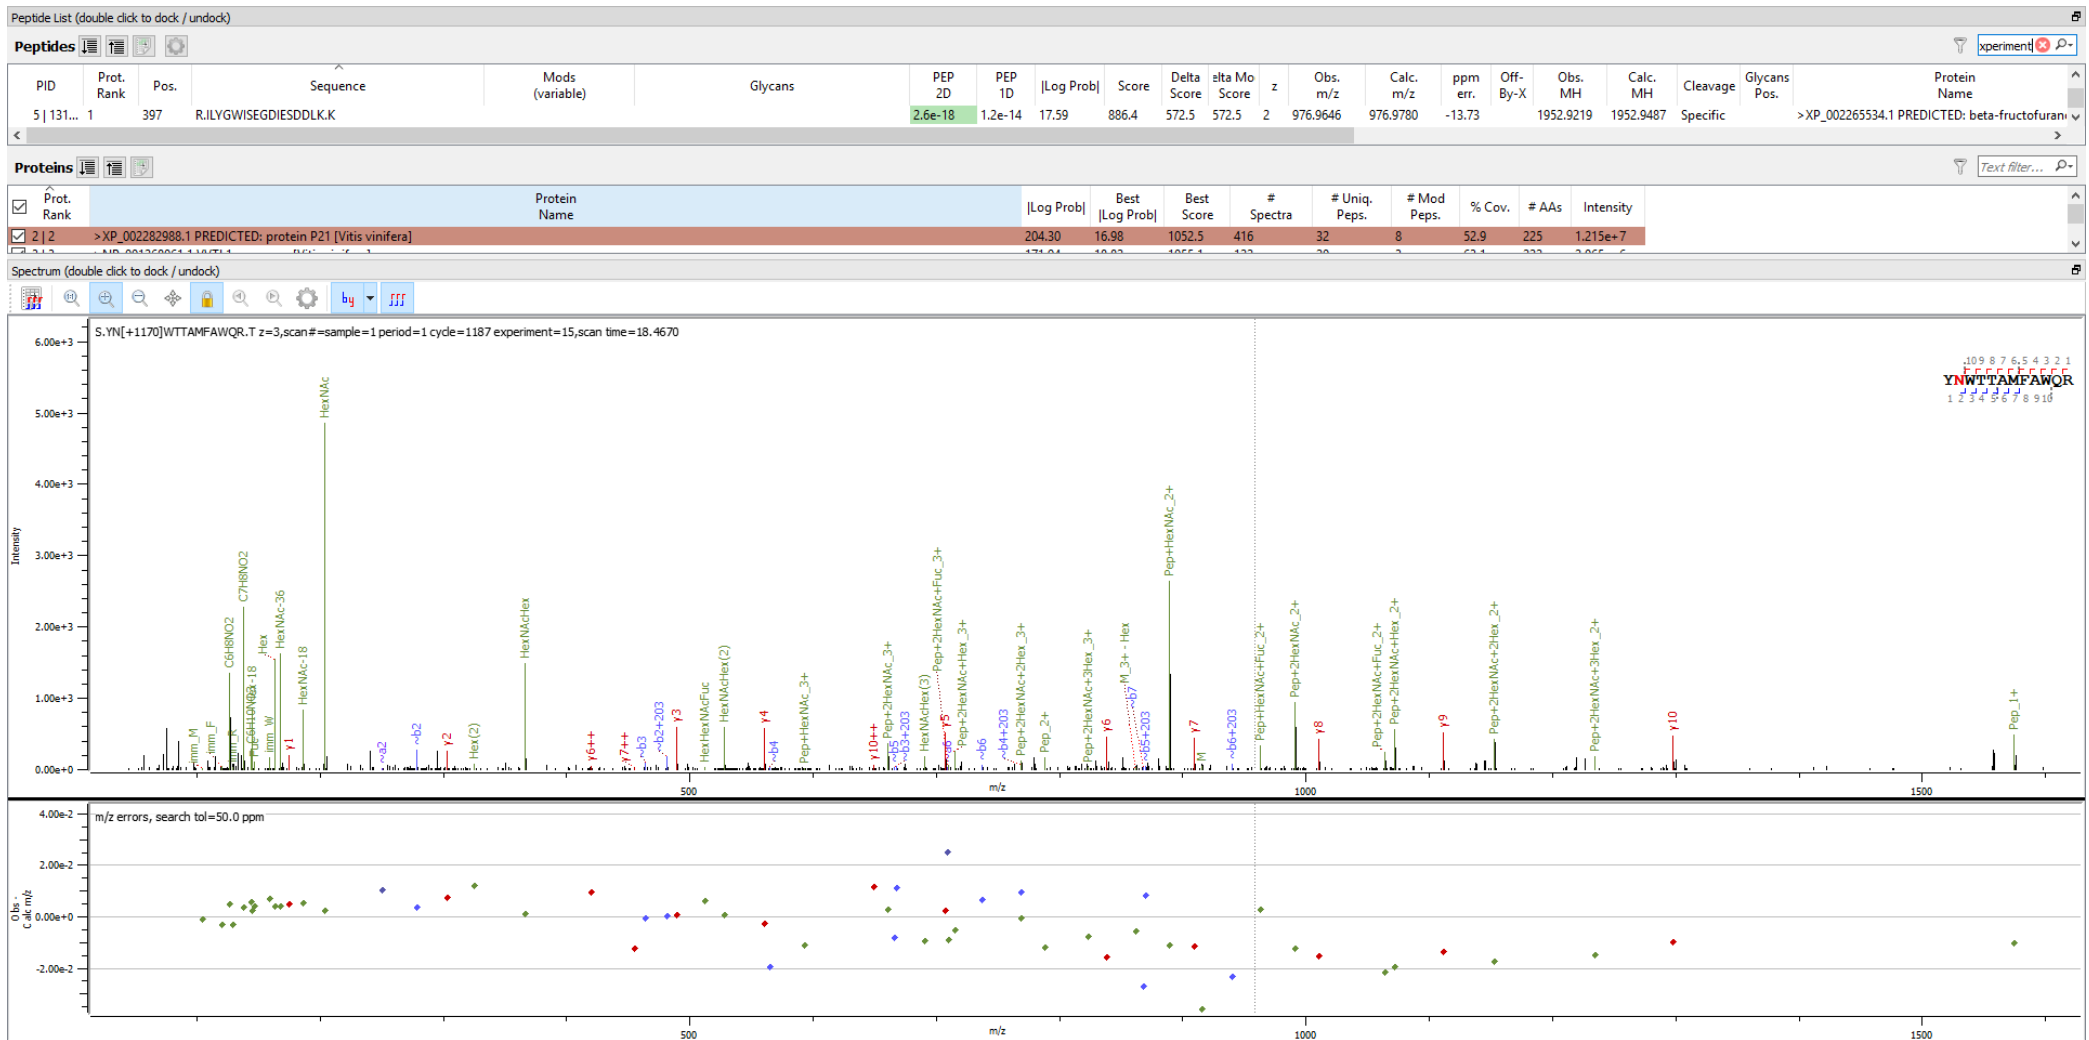

Sample S1 S.YN[+1170.417]WTTAMFAWQR.T



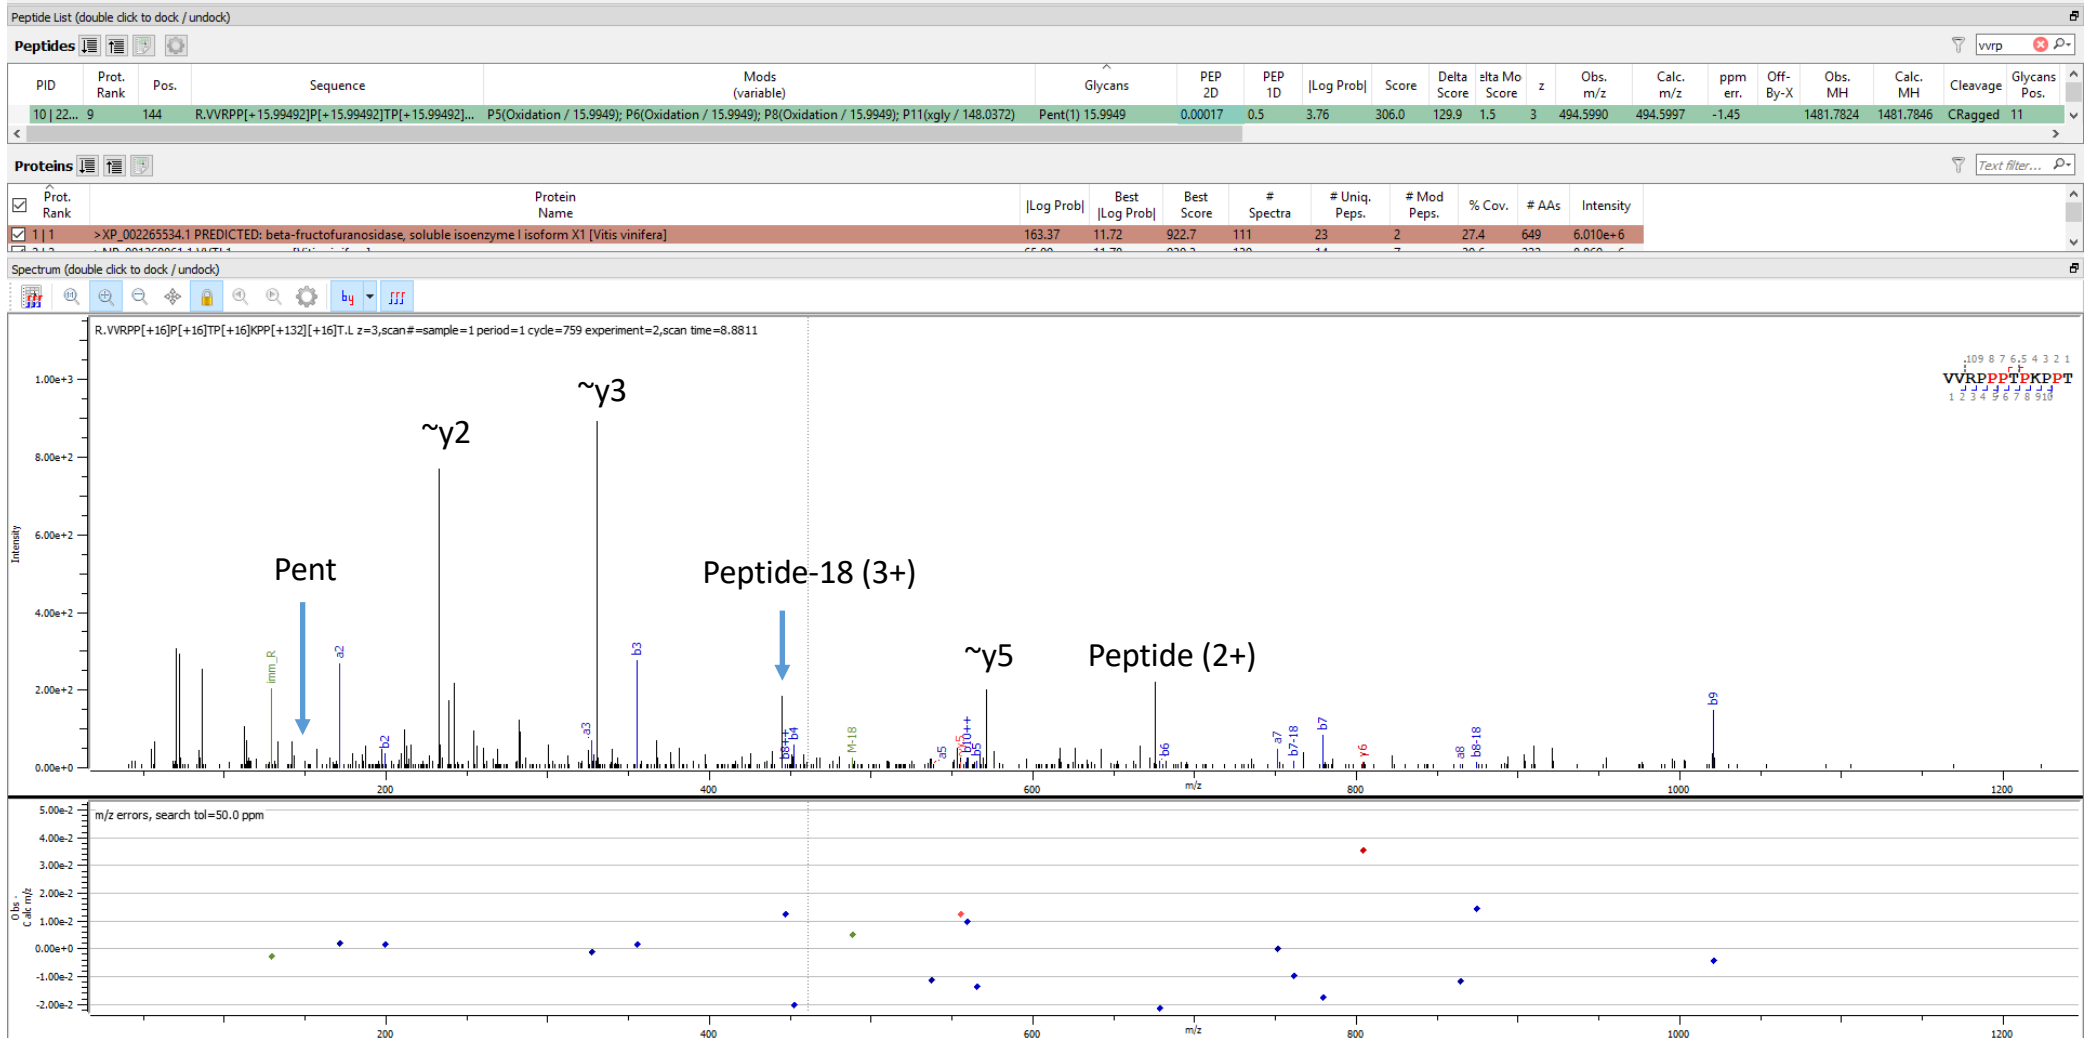

Sample S3 R.VVRRPP[+15.995]P[+15.995]TP[+15.995]KPP[+132.042][+15.995]T.L

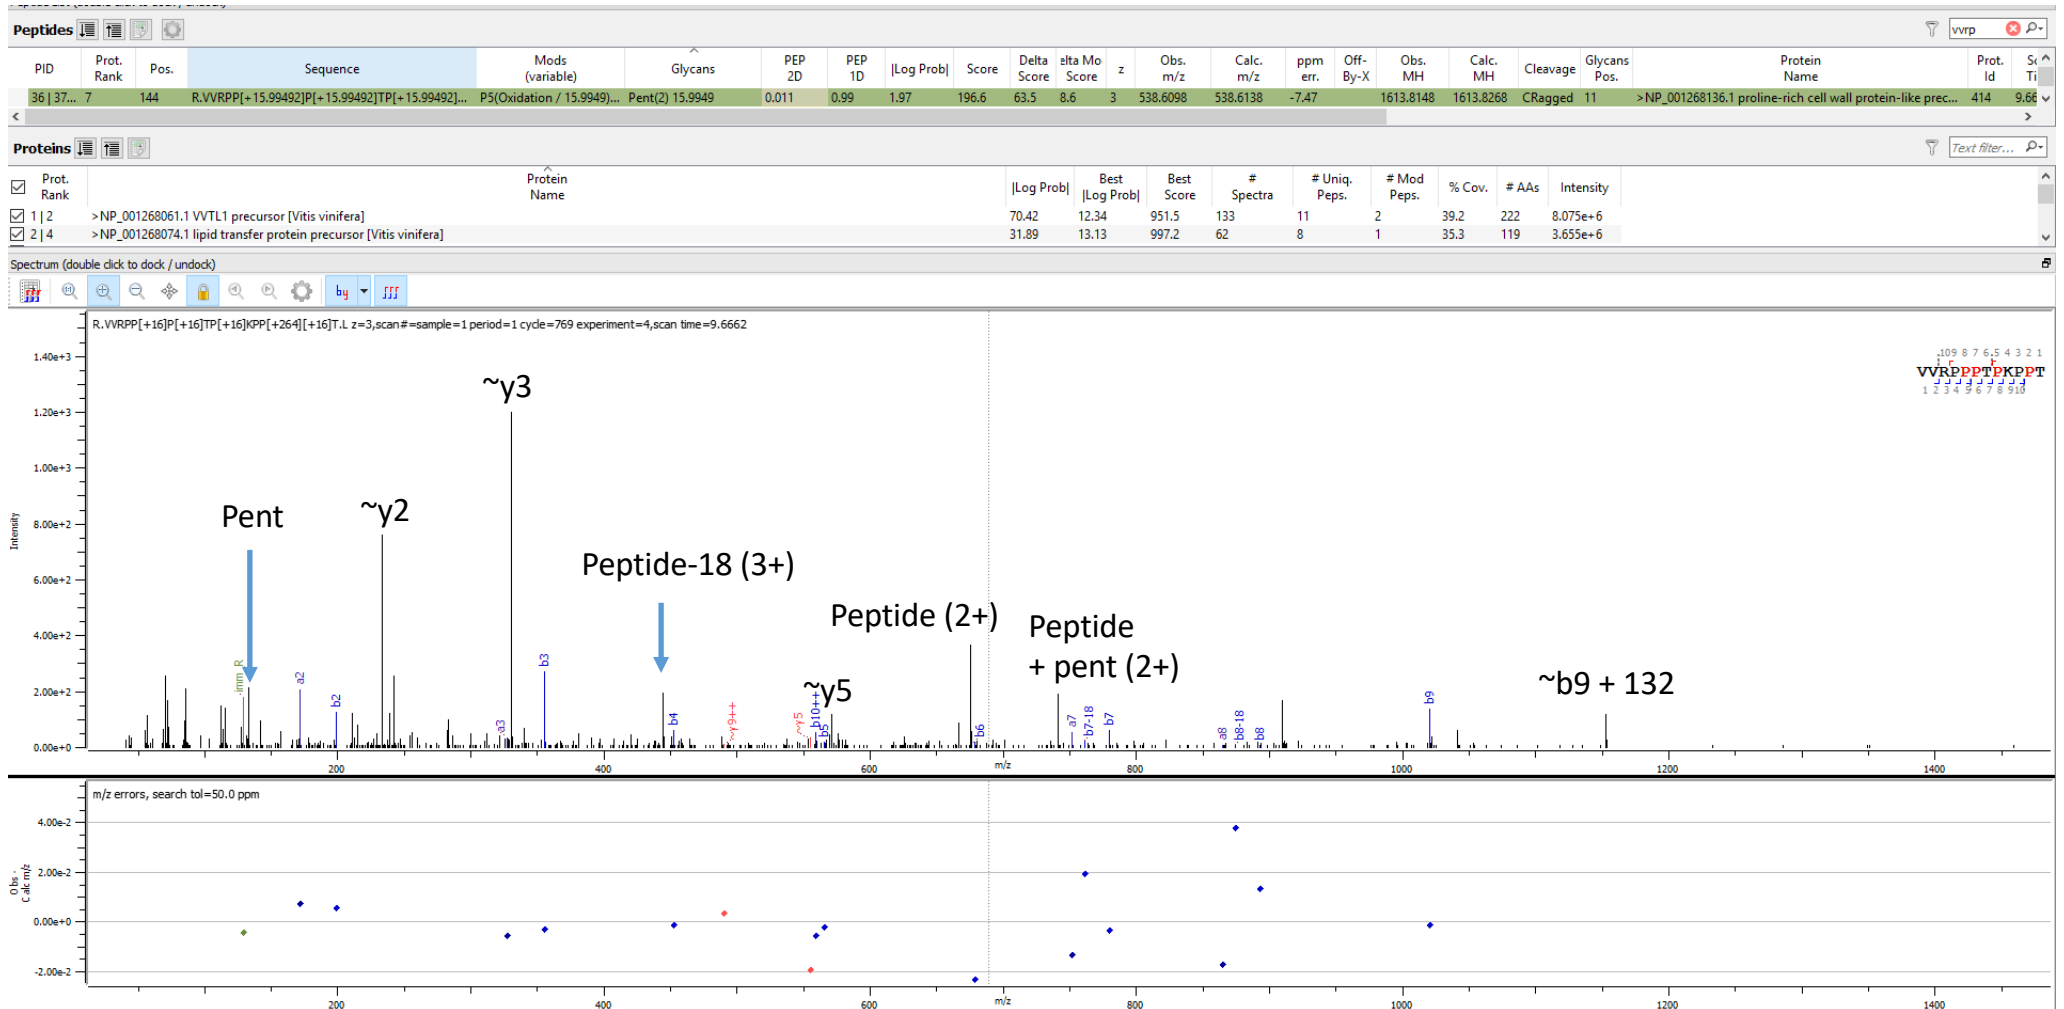

Sample S4 R.VVRPP[+15.995]P[+15.995]TP[+15.995]KPP[+264.085][+15.995]T.L

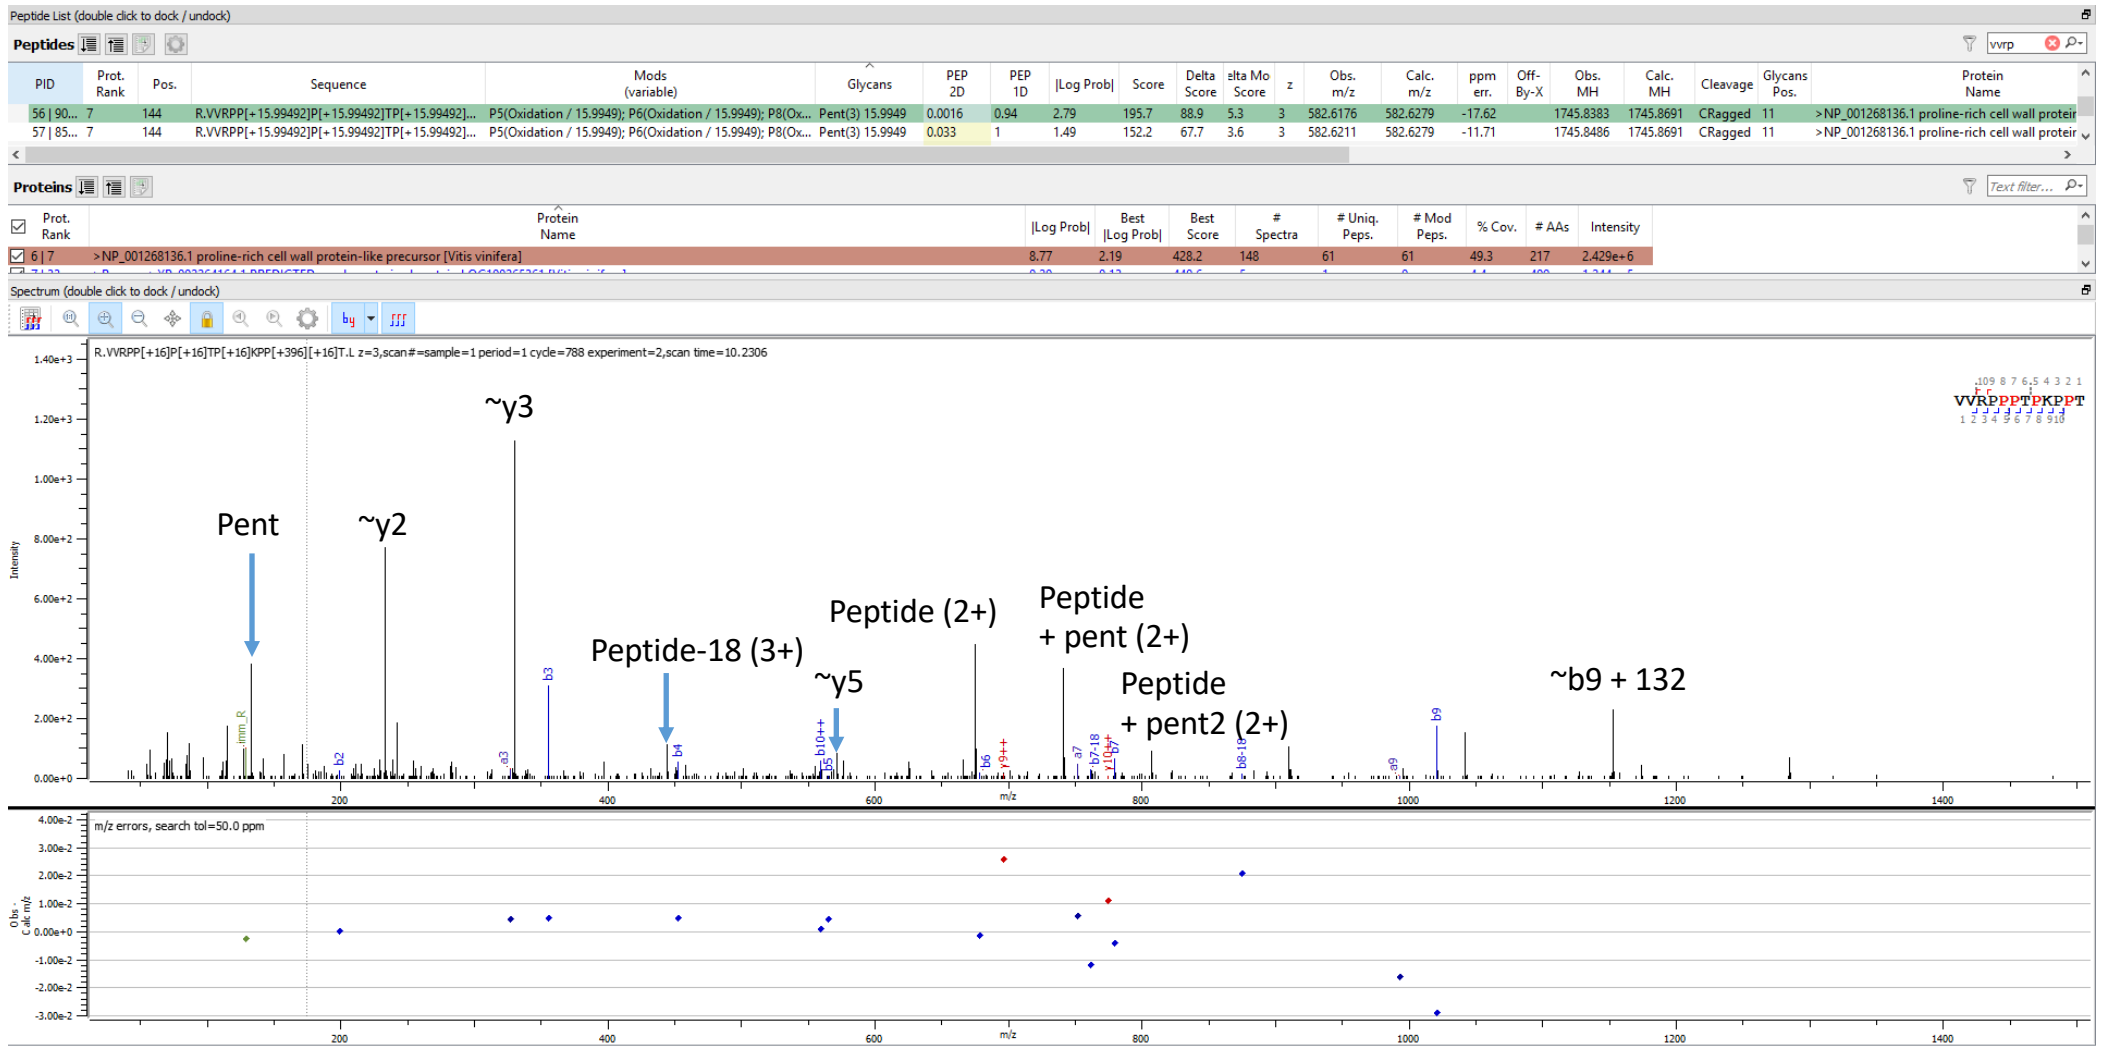

Sample S4 R.VVRRPP[+15.995]P[+15.995]TP[+15.995]KPP[+396.127][+15.995]T.L

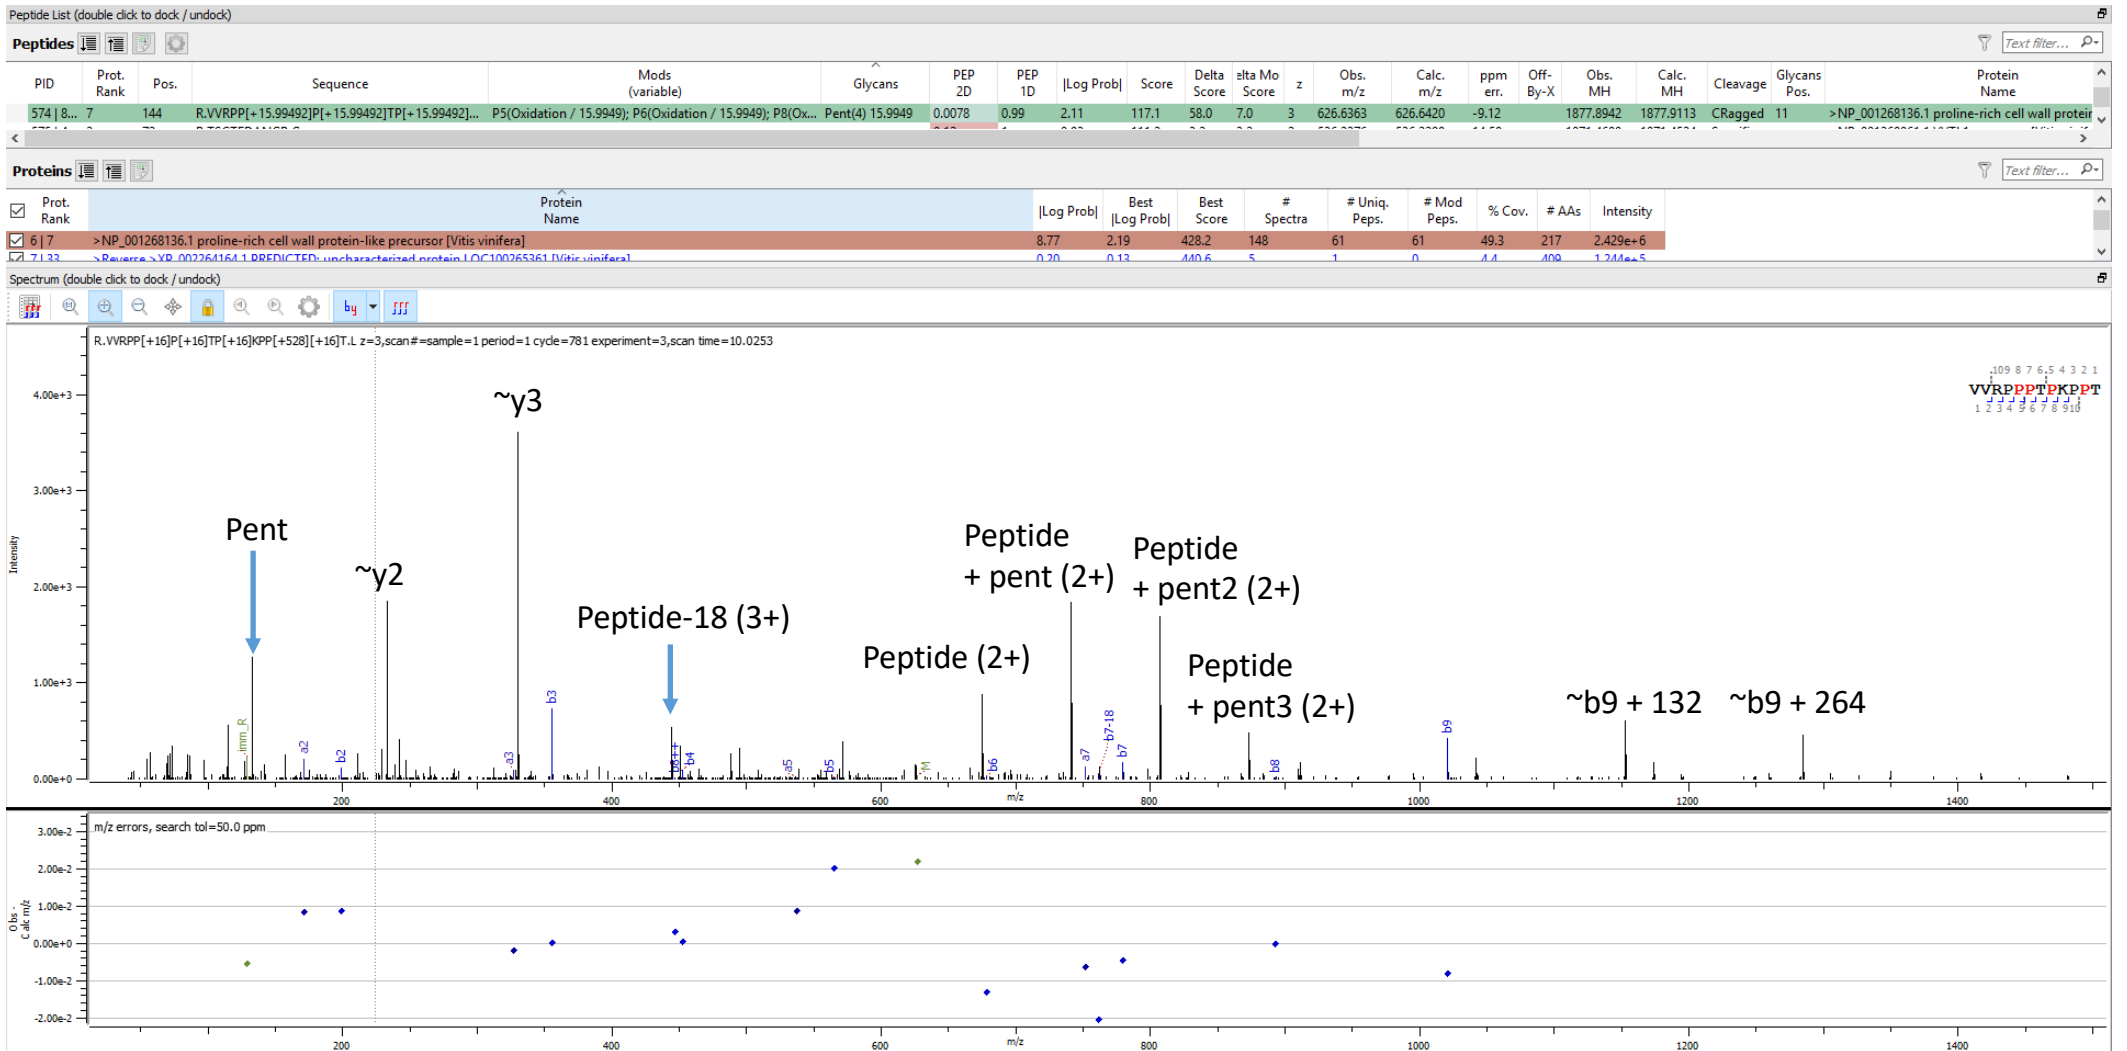

Sample S4 R.VVRPP[+15.995]P[+15.995]TP[+15.995]KPP[+528.169][+15.995]T.L

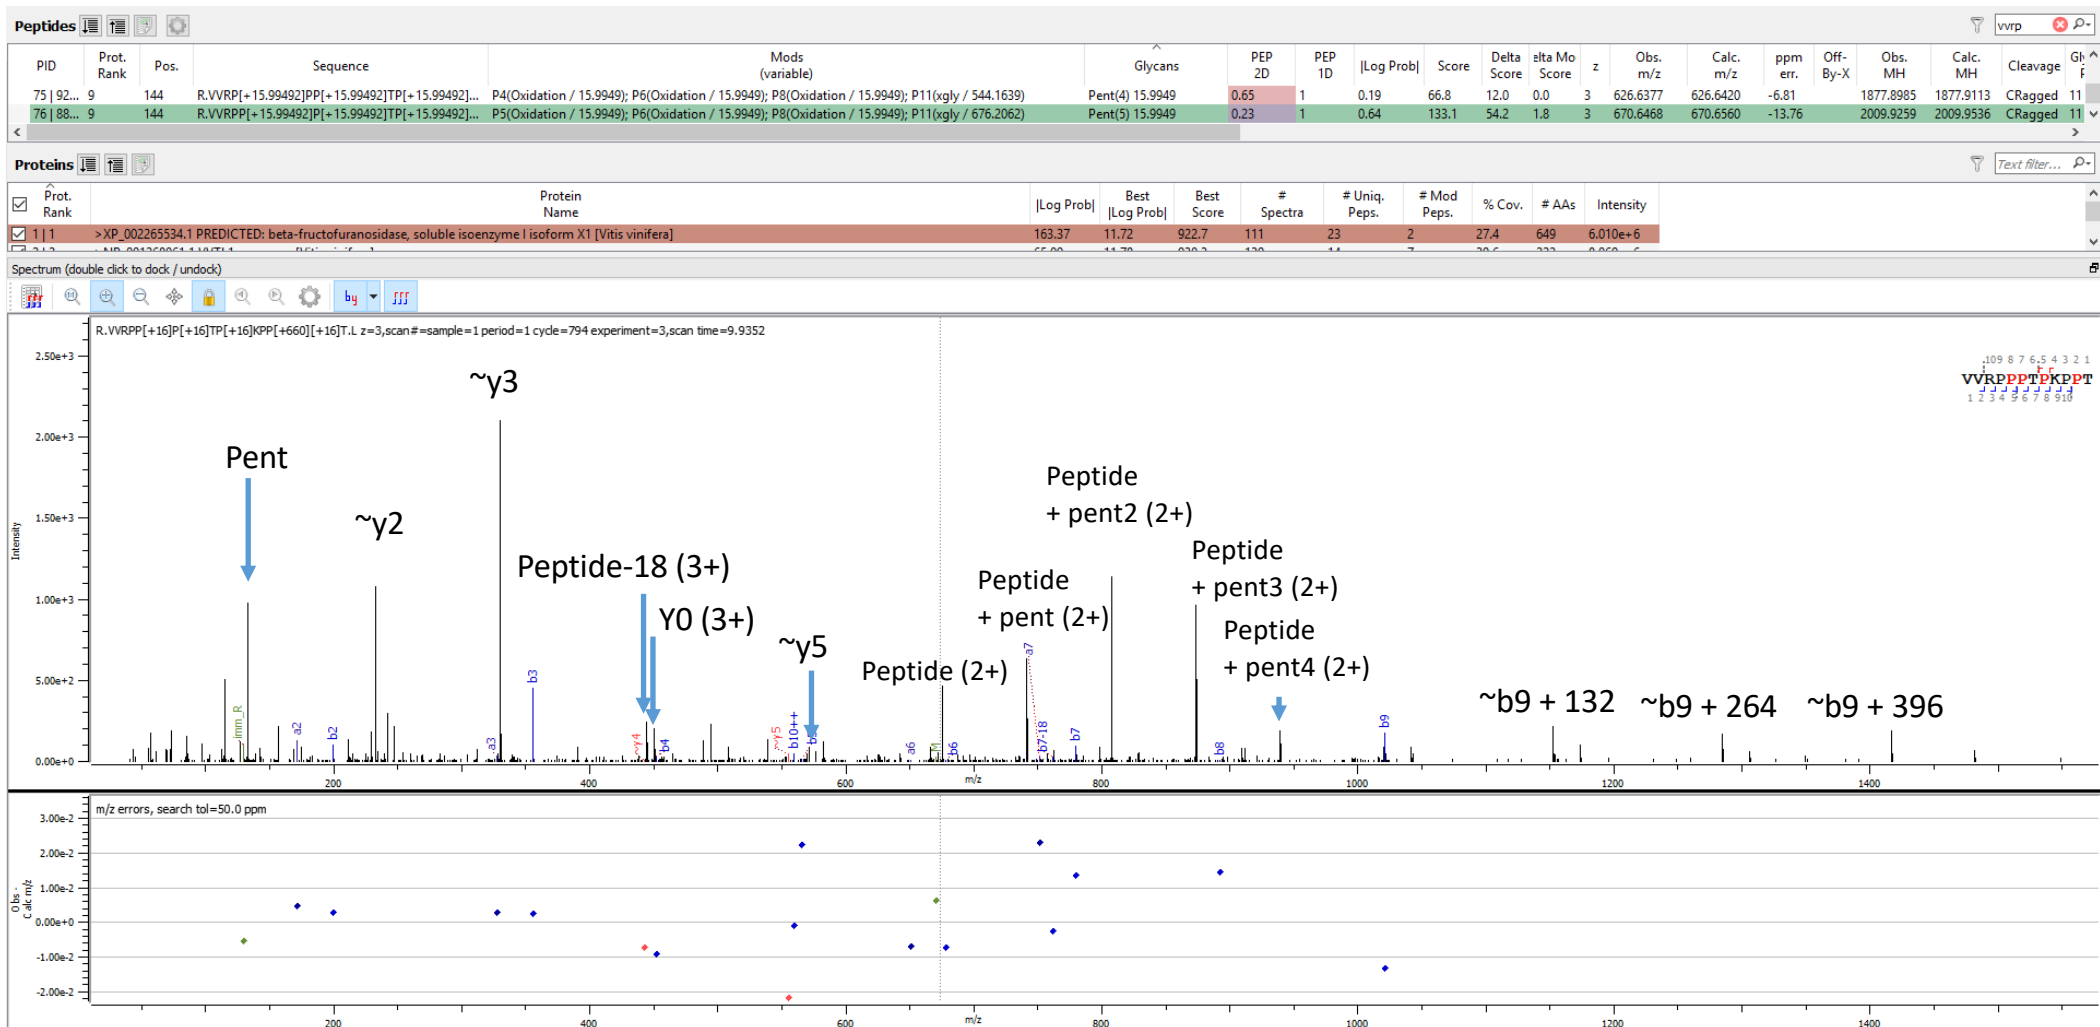

Sample S3 R.VVVRPP[+15.995]P[+15.995]TP[+15.995]KPP[+660.211][+15.995]T.L

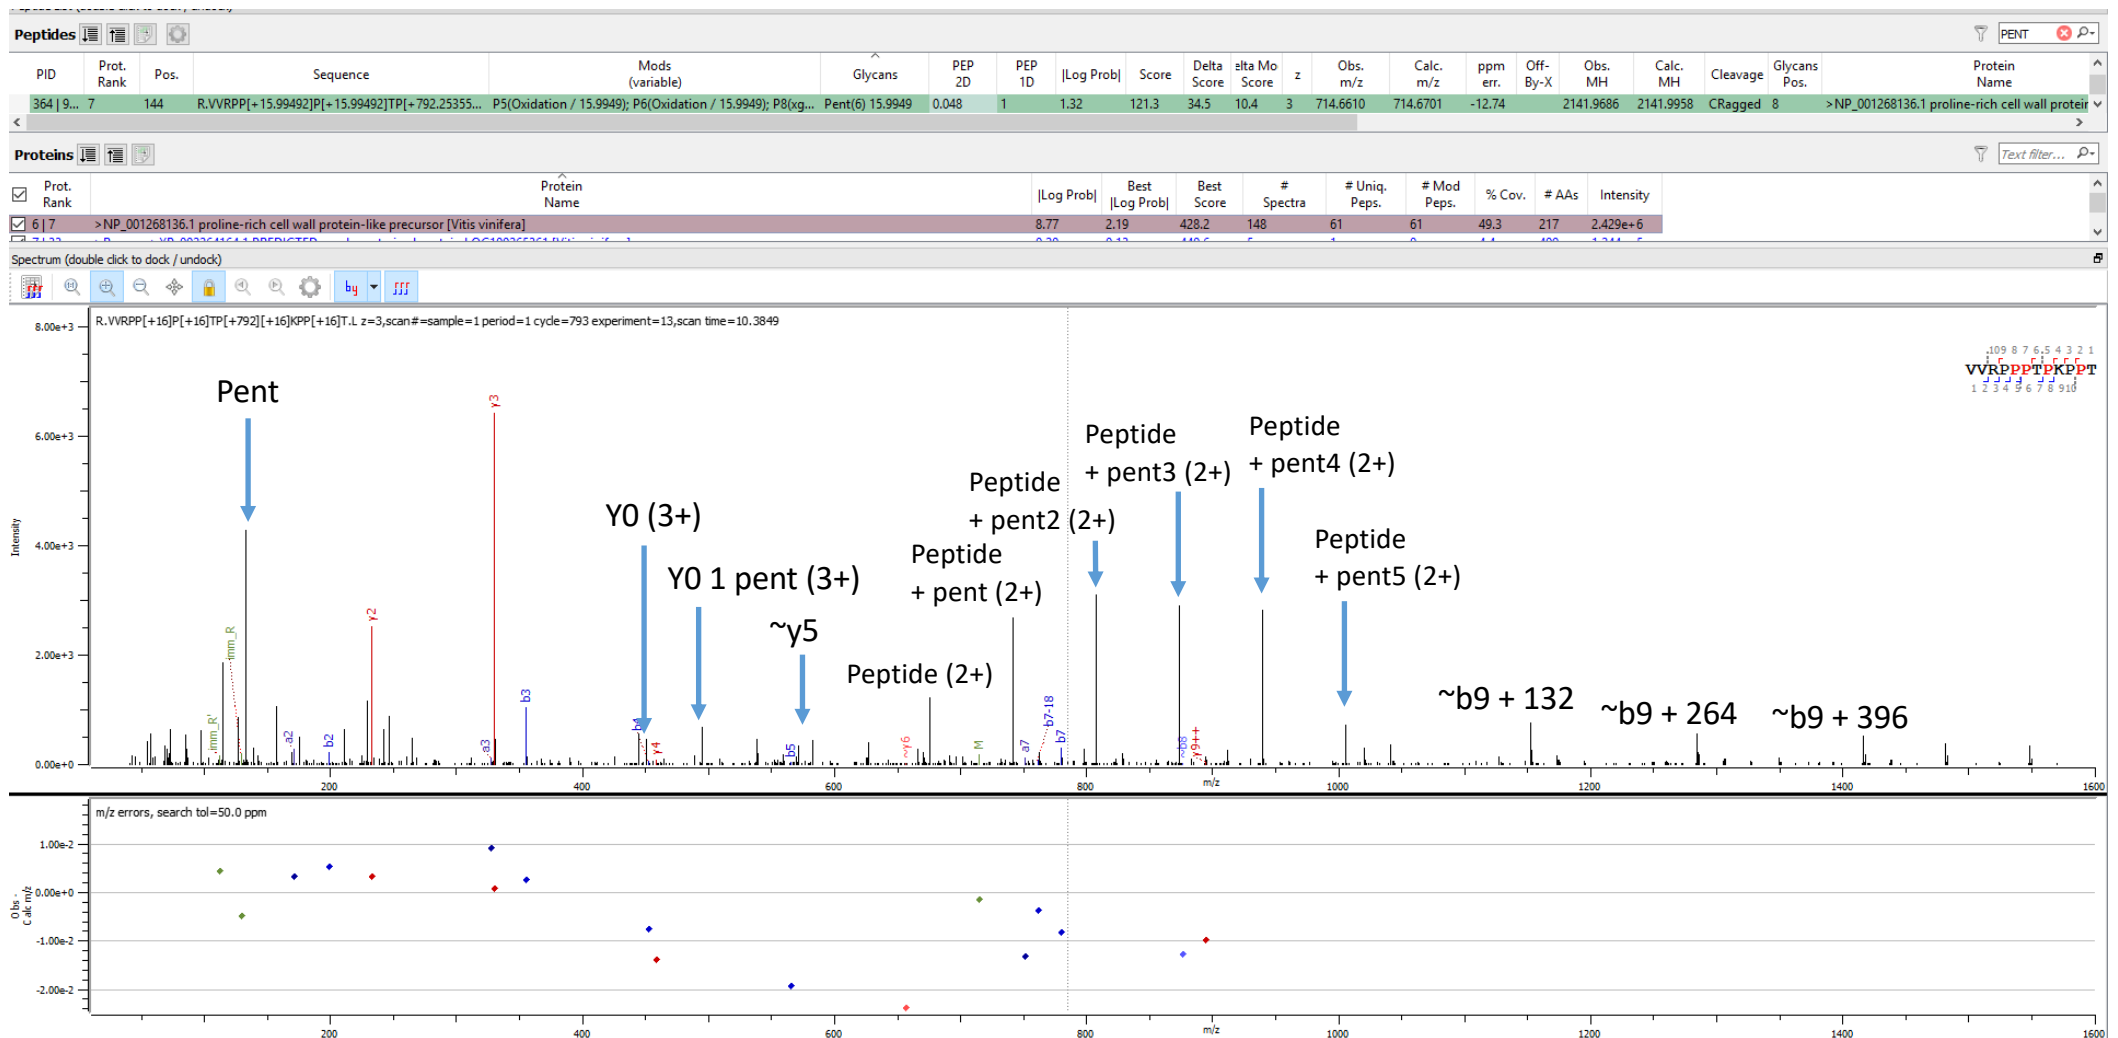

Sample S4 R.VVRPP[+15.995]P[+15.995]TP[+792.254][+15.995]KPP[+15.995]T.L
